# Supplementary material
Source: publisher site journal article supplement (https://www.spandidos-publications.com/4979/downloadSupplementary)
Supplement: Supplementary file 1 [file downloadSupplementary]

## Sheet: TCGA-Hispanic
Table SVII. Mutation significance scores.
Gene	expr	reptime	hic	N_nonsilent	N_silent	N_noncoding	n_nonsilent	n_silent	n_noncoding	nnei	x	X	p	q
TP53	2069567	213	34	101937	28149	0	9	0	0	50	0	1710225	2.5876e-10	4.88072e-06
PIK3CA	401889	613	11	260502	64911	0	11	0	0	50	0	2024022	8.36795e-06	0.0789182
GATA3	182932	675	-2	102366	31383	0	4	0	0	50	2	1956405	6.929e-05	0.435649
MAP3K1	200595	412	38	354024	102861	0	9	1	0	50	1	1861497	0.000166114	0.783309
TYW3	104029	1055	-14	64218	15378	0	4	0	0	50	0	2478531	0.000327849	1
KHDC1	742452	565	13	39402	10791	0	2	0	0	50	0	2259246	0.000433986	1
CEACAM8	495357	380	5	81543	24585	0	2	0	0	50	0	2229843	0.000654697	1
TCP10L2	NaN	NaN	NaN	83655	24156	0	2	0	0	50	0	3699168	0.00072554	1
GPS2	1911735	206	36	80355	21219	0	2	0	0	50	0	2046000	0.000755593	1
SNAP29	470051	216	39	61842	16665	0	2	0	0	50	0	1554267	0.000775591	1
WBSCR28	1099366	208	37	60225	19965	0	3	0	0	50	0	1513380	0.000775847	1
UBE3C	389401	334	9	260337	70323	0	4	0	0	50	0	2238885	0.000845685	1
CDH1	924096	240	30	207768	60423	0	3	0	0	50	0	1684023	0.000963162	1
SHISA9	NaN	NaN	NaN	106854	31350	0	2	0	0	50	0	3706362	0.00117113	1
EIF2B2	875817	222	53	83688	23826	0	2	0	0	50	0	1686399	0.0012089	1
KPNA7	NaN	NaN	NaN	121341	35772	0	3	0	0	50	0	3710784	0.0015002	1
44810	656561	NaN	61	107712	27225	0	2	0	0	50	0	1815363	0.00173114	1
UPP1	108417	409	26	74250	20889	0	2	0	0	50	0	1965810	0.00199047	1
TREM1	270628	607	34	54879	16302	0	2	0	0	50	0	1392039	0.00216449	1
KPNA3	422339	296	51	127941	33429	0	3	0	0	50	0	1665939	0.00269551	1
GSTO2	293891	376	8	58905	15543	0	2	0	0	50	1	1901559	0.00306671	1
DNAJB5	676166	394	23	97515	28710	0	3	0	0	50	1	2821005	0.0032088	1
BSX	698665	416	8	53097	17094	0	2	0	0	50	1	1568325	0.00364525	1
QARS	1898051	203	36	187275	52701	0	2	0	0	50	0	2131140	0.00381202	1
NFKBID	1060028	321	47	71841	24585	0	2	0	0	50	1	1788831	0.00386836	1
SEC23B	414545	392	23	184371	51249	0	2	0	0	50	0	2030820	0.00406996	1
NAA15	389880	299	26	215424	49599	0	2	0	0	50	0	2262513	0.00447862	1
IGDCC3	646843	280	40	186054	61149	0	2	0	0	50	0	1915518	0.00466141	1
LPP	148376	685	6	142494	43131	0	2	0	0	50	0	2404644	0.00478486	1
DCDC1	84163	938	-25	85371	22836	0	2	0	0	50	1	2167770	0.00488628	1
P2RY13	67416	548	15	82764	23265	0	2	0	0	50	1	2082135	0.00497482	1
SPATA17	87153	966	-21	89925	21747	0	2	0	0	45	1	2227302	0.0051269	1
RBMS2	2807863	166	57	99198	27126	0	2	0	0	50	1	2421672	0.00527223	1
SNRNP40	643810	234	30	86526	23562	0	3	0	0	50	1	1811568	0.00541174	1
TIAL1	823029	217	22	97185	23892	0	2	0	0	50	0	1508793	0.00562158	1
MAGEB1	74310	NaN	16	80454	23298	0	2	0	0	50	1	1895223	0.00564804	1
C15orf52	872646	184	42	124806	38247	0	3	0	0	50	0	1886676	0.00591786	1
TIGD2	147602	529	24	123750	32472	0	2	0	0	50	0	1868460	0.00593161	1
FOXA1	67481	487	-58	107448	33429	0	2	0	0	50	0	1616637	0.00597191	1
C11orf66	1415260	274	58	103356	28314	0	3	0	0	50	0	1536414	0.00611238	1
ZBTB26	407115	430	26	105138	26532	0	2	0	0	50	1	2219052	0.00697713	1
NMT1	831501	191	28	120648	31515	0	2	0	0	50	1	2208030	0.00700146	1
CASP6	211934	473	25	71709	18183	0	2	0	0	50	1	1503282	0.00706843	1
PKM2	1130931	192	36	138501	40392	0	2	0	0	50	0	1885752	0.00723684	1
SYT14	223343	547	-5	149820	38082	0	2	0	0	50	0	1989174	0.00759472	1
MCHR1	726133	165	54	95172	30855	0	2	0	0	50	1	1853709	0.00813791	1
SLC9A10	268687	508	22	289278	71676	0	3	0	0	50	0	2248323	0.0081944	1
REPS1	310511	613	16	190377	53856	0	2	0	0	50	0	2392797	0.0084356	1
LANCL3	108134	NaN	13	102432	31119	0	2	0	0	50	1	1940367	0.00858256	1
PARP12	462854	639	35	167310	45540	0	2	0	0	50	0	2062368	0.00875518	1
NOP10	542657	234	22	15675	4224	0	1	0	0	50	0	1746789	0.00897334	1
BRD7	303953	520	14	161766	38709	0	2	0	0	50	0	1940796	0.00921952	1
MT1G	661565	143	26	16104	3300	0	1	0	0	49	0	1738902	0.00926015	1
SRXN1	622277	480	42	30855	10725	0	2	0	0	50	4	2609244	0.00932736	1
WDR44	131060	NaN	25	220803	58179	0	2	0	0	50	0	1598817	0.00944283	1
SNURF	233460	1194	-44	17886	4884	0	1	0	0	44	0	1847538	0.00968047	1
BCL9	NaN	NaN	NaN	324687	101508	0	4	0	0	50	0	3776520	0.00978113	1
H2BFM	NaN	NaN	NaN	36234	10791	0	1	0	0	50	0	3685803	0.0098298	1
ZMPSTE24	627703	373	18	114708	30228	0	2	0	0	50	1	1992672	0.0101232	1
KRT9	1494501	323	11	145497	42801	0	2	0	0	20	0	1015575	0.0101623	1
FAM172A	264052	622	6	102531	25278	0	2	0	0	50	1	1734678	0.0106449	1
VAMP2	1381225	202	37	28611	7920	0	1	0	0	50	0	2612544	0.0109509	1
CFLAR	617625	205	39	120582	31581	0	2	0	0	50	1	2000196	0.0110516	1
POLR3A	362530	184	31	333630	91377	0	3	0	0	50	0	2222913	0.0111529	1
WSCD2	451405	644	29	133518	37356	0	3	0	0	50	1	2181267	0.0113208	1
CAMK2N2	NaN	NaN	NaN	18777	5379	0	1	0	0	31	0	1624656	0.0115564	1
CHAC2	NaN	NaN	NaN	43890	12045	0	1	0	0	50	0	3687057	0.0119029	1
C17orf72	NaN	NaN	NaN	44979	13629	0	1	0	0	50	0	3688641	0.0121922	1
SAP25	NaN	NaN	NaN	45804	15378	0	2	0	0	50	0	3690390	0.0124102	1
NIPAL4	266195	1087	41	106788	33891	0	2	0	0	50	1	1665081	0.0124266	1
PTEN	259678	300	34	99924	23232	0	2	0	0	50	2	1690590	0.0125107	1
ITIH5L	257678	NaN	19	298452	96756	0	3	0	0	50	0	1873146	0.0125673	1
MDGA1	359430	461	50	222519	67749	0	2	0	0	50	0	2266935	0.0125807	1
ZNF185	235275	NaN	23	185196	52404	0	2	0	0	50	0	1878987	0.0126787	1
CD99	NaN	NaN	NaN	46827	11979	0	1	0	0	50	0	3686991	0.0126992	1
TFAP2A	199695	375	6	107283	31515	0	2	0	0	50	1	1650000	0.0127532	1
VPS39	625465	394	35	213939	55737	0	2	0	0	50	0	2140512	0.0130179	1
URB2	299238	340	15	350625	105864	0	3	0	0	50	0	2138829	0.013302	1
ELFN2	969938	179	53	184668	59169	0	2	0	0	50	0	1823514	0.0133455	1
FAM25A	NaN	NaN	NaN	21879	6039	0	1	0	0	31	0	1625316	0.0134594	1
AMELX	NaN	NaN	NaN	49797	13761	0	1	0	0	50	0	3688773	0.0134977	1
PWWP2A	199338	417	21	183513	55473	0	2	0	0	50	0	1792362	0.0136245	1
PPP1R9A	419387	534	-15	331881	86394	0	3	0	0	50	0	1999536	0.0136352	1
MORC1	88595	1029	-12	244629	58806	0	2	0	0	50	0	2375703	0.0137719	1
HOOK1	59567	747	-3	182556	42273	0	3	0	0	50	1	2330328	0.0139272	1
SLC5A7	122653	911	-16	135267	40458	0	2	0	0	50	1	1977459	0.014035	1
TMEM14A	531039	498	18	24189	7095	0	1	0	0	50	0	1717419	0.0140829	1
MRPS17	760564	642	11	30459	9240	0	1	0	0	50	0	2136156	0.0142569	1
ATP6V1G2	2517285	220	35	28941	7590	0	1	0	0	50	0	2023098	0.0143033	1
C7orf29	NaN	NaN	NaN	54087	16302	0	1	0	0	50	0	3691314	0.0146491	1
COX7B2	86349	938	11	19569	5181	0	1	0	0	50	3	2194995	0.0147149	1
TUBB3	1131847	221	40	105996	29337	0	2	0	0	50	1	1507803	0.0147756	1
KRTAP5-5	NaN	NaN	NaN	54780	16104	0	1	0	0	50	0	3691116	0.0148388	1
TBC1D16	660356	237	21	179388	53064	0	3	0	0	50	0	1672869	0.0148662	1
C1orf204	NaN	NaN	NaN	55374	16797	0	1	0	0	50	0	3691809	0.0149965	1
GNL3L	302365	NaN	31	141867	37224	0	2	0	0	50	1	2257002	0.015146	1
KRT24	953708	269	13	122991	36201	0	3	0	0	50	2	1865226	0.01538	1
LBH	136617	581	18	25971	6303	0	1	0	0	50	0	1676598	0.0154875	1
VPS53	486092	514	7	201960	55044	0	2	0	0	50	0	1836318	0.0155907	1
CARNS1	1269888	177	51	211035	74976	0	5	0	0	50	0	1918719	0.0155925	1
C1orf68	NaN	NaN	NaN	57585	16962	0	1	0	0	50	0	3691974	0.0155949	1
CHCHD2	738325	642	4	35343	11187	0	1	0	0	50	0	2249016	0.0157125	1
RGPD3	NaN	NaN	NaN	420156	111177	0	2	0	0	50	0	3786189	0.0158555	1
PTBP1	2041736	198	25	132924	38346	0	2	0	0	50	1	2043129	0.0160411	1
ZNF732	NaN	NaN	NaN	140712	33825	0	4	1	0	31	1	1653102	0.0162744	1
SLIT2	44181	1366	3	372801	95865	0	3	0	0	50	0	2055075	0.0162759	1
TCF7L1	973960	394	18	136851	42636	0	2	0	0	50	1	2075370	0.0164055	1
RBP2	232582	754	21	33693	7788	0	1	0	0	50	0	2037321	0.0165345	1
CTR9	794670	261	20	286539	71643	0	2	0	0	50	0	1563507	0.0166098	1
NPNT	262174	361	7	147015	40194	0	2	0	0	50	1	1694319	0.0166176	1
UBE2D1	153069	326	-12	37290	9042	0	1	0	0	50	0	2207700	0.0168873	1
SR140	361096	467	23	254958	61842	0	3	0	0	50	1	2928321	0.0169871	1
PNPLA7	1453700	213	35	317163	95172	0	3	0	0	50	0	2744049	0.0171142	1
PCP2	611341	384	33	32901	9273	0	1	0	0	50	0	1919808	0.0171343	1
UBL5	1069900	579	-26	19074	4488	0	1	0	0	50	1	1900470	0.0173013	1
SERP2	190099	161	43	16500	3894	0	1	0	0	50	1	1639242	0.0173515	1
LYZL4	342219	527	19	35904	9339	0	1	0	0	50	0	2065173	0.0173818	1
UBE2V2	890573	464	31	35640	9108	0	1	0	0	50	0	2043096	0.0174405	1
C5orf60	NaN	NaN	NaN	64746	19998	0	1	0	0	50	0	3695010	0.017518	1
TCEB2	1717244	210	42	39567	10923	0	1	0	0	50	0	2234496	0.0177033	1
DENND2C	626568	394	8	210804	54516	0	2	0	0	50	0	1789920	0.0177265	1
UBE2D4	872910	239	44	37224	9306	0	1	0	0	50	0	2097513	0.0177428	1
C6orf201	181759	353	22	34287	8778	0	1	0	0	50	0	1924131	0.0178152	1
SRP14	846041	256	23	33099	9372	0	1	0	0	50	0	1844403	0.0179416	1
UQCR10	848649	195	37	18645	5016	0	1	0	0	50	1	1775169	0.0181026	1
IL25	1220624	456	31	42207	12144	0	1	0	0	50	0	2308515	0.0182793	1
GLYATL3	NaN	NaN	NaN	68145	19668	0	1	0	0	50	0	3694680	0.0184394	1
INPP5A	155331	452	12	103719	25278	0	2	0	0	50	3	2075040	0.0184472	1
CT47B1	NaN	NaN	NaN	68673	21219	0	1	0	0	50	0	3696231	0.0185757	1
IL15	74660	679	5	41349	9438	0	1	0	0	50	0	2201265	0.0187797	1
MRPS24	872910	239	44	39402	11880	0	1	0	0	50	0	2097513	0.0187805	1
COX6A2	839076	558	11	23001	7293	0	1	0	0	50	1	2094246	0.0189255	1
PMCH	229712	552	12	40128	10362	0	1	0	0	50	0	2116983	0.0189507	1
CCDC101	NaN	NaN	NaN	70983	20097	0	1	0	0	50	0	3695109	0.0192046	1
TMSB15A	96151	NaN	0	11946	2508	0	1	0	0	27	1	1064547	0.0193017	1
OR5M8	NaN	NaN	NaN	71940	20724	0	1	0	0	50	0	3695736	0.0194613	1
SLC25A6	NaN	NaN	NaN	72006	21648	0	1	0	0	50	0	3696660	0.019473	1
NALCN	47011	804	5	422730	110781	0	3	0	0	50	0	2116422	0.0197059	1
GRM1	92600	941	-13	281127	83193	0	2	0	0	50	0	2253669	0.0197357	1
MAL	171487	647	-1	35871	11253	0	2	0	0	50	0	1813020	0.0197797	1
TXN2	1199592	195	21	38907	11682	0	1	0	0	50	0	1956999	0.0198758	1
C3orf45	843769	206	51	38016	12375	0	1	0	0	50	0	1897764	0.020027	1
C2CD4D	NaN	NaN	NaN	75075	30261	0	1	0	0	50	0	3705273	0.020256	1
OSBPL8	586978	492	3	219351	54087	0	2	0	0	50	0	1731609	0.0203092	1
LIN7C	371553	477	-10	47223	13365	0	1	0	0	50	0	2315841	0.0203858	1
CNGB3	191008	1171	2	196053	51447	0	2	0	0	50	0	1542453	0.0204376	1
C4orf47	NaN	NaN	NaN	75834	19206	0	1	0	0	50	0	3694218	0.0205216	1
PLCXD1	NaN	NaN	NaN	75999	22605	0	3	0	0	50	0	3697617	0.0205465	1
MRPS18A	1626879	278	43	46761	13926	0	2	0	0	50	0	2274030	0.0205571	1
LCN10	1898901	190	39	47784	14091	0	1	0	0	50	0	2307096	0.0207057	1
TRAPPC9	327071	689	16	293898	85371	0	3	0	0	50	0	2287923	0.0208439	1
DPH3	205091	437	26	20724	4719	0	1	0	0	50	1	1704351	0.0209424	1
UTS2	375594	415	23	40821	10461	0	1	0	0	47	0	1943667	0.0209958	1
LY6G6D	2517236	193	20	31119	9471	0	1	0	0	50	1	2545917	0.0210518	1
LIX1L	NaN	NaN	NaN	77913	24651	0	1	0	0	50	0	3699663	0.0210527	1
DHRSX	NaN	NaN	NaN	78012	23067	0	1	0	0	50	0	3698079	0.0210892	1
C19orf10	921603	203	35	41976	11880	0	1	0	0	50	0	1985577	0.021134	1
TMEM126B	325720	554	-19	48477	12804	0	1	0	0	50	0	2292015	0.0211442	1
PIRT	58616	911	-49	31449	9537	0	1	0	0	50	0	1472889	0.021345	1
OGDHL	251871	545	15	241692	67188	0	2	0	0	38	0	1847538	0.0215619	1
ANKRD37	173409	422	20	38643	10461	0	1	0	0	50	0	1779822	0.0217052	1
MTPN	387359	588	-9	28479	8052	0	1	0	0	50	0	1292247	0.022031	1
COX7B	549293	NaN	19	19932	5115	0	1	0	0	50	2	2206974	0.022082	1
CTXN3	284904	682	29	18975	5775	0	1	0	0	50	2	2099889	0.0220938	1
RPL12	784133	209	45	41019	11055	0	1	0	0	50	0	1853676	0.0221212	1
SPAG11A	69060	693	-5	25938	7623	0	1	0	0	50	1	1968450	0.0226845	1
MMP9	630342	381	51	165858	49368	0	2	0	0	50	1	2063358	0.022832	1
SCGB3A1	855370	515	13	23562	8613	0	1	0	0	50	1	1772067	0.0228891	1
CRYAA	687433	279	59	40359	12309	0	1	0	0	50	0	1761540	0.0229029	1
CTF1	1508459	247	46	44088	16896	0	1	0	0	50	0	1907961	0.0230992	1
IL22	383435	623	12	43461	11781	0	1	0	0	50	0	1854303	0.0234292	1
FBXO48	212087	617	30	37950	9174	0	1	0	0	50	0	1618584	0.0234377	1
IPO8	239796	580	-19	254034	63756	0	2	0	0	50	0	1849023	0.023612	1
HIST1H3G	390169	544	57	30690	10197	0	1	0	0	50	0	1285020	0.0238734	1
HMGN3	233858	624	0	25674	6006	0	1	0	0	50	1	1843974	0.0239622	1
CLIC1	2513551	176	26	57453	16401	0	1	0	0	50	0	2387781	0.0240518	1
S100A4	1454773	186	26	25245	5841	0	1	0	0	50	1	1796157	0.0241876	1
TTBK2	611976	453	31	291654	83655	0	3	0	0	50	0	2090385	0.0242945	1
C10orf11	29386	1001	3	48279	13002	0	1	0	0	50	0	1985214	0.02431	1
RALA	221320	445	20	50589	12474	0	1	0	0	50	0	2042007	0.0247639	1
RAB27B	105818	372	-13	53460	13563	0	1	0	0	50	0	2129985	0.0250883	1
FAM186A	NaN	NaN	NaN	544797	156717	0	3	0	0	50	0	3831729	0.0251562	1
SPCS1	1217701	272	47	39798	12078	0	1	0	0	50	1	2703756	0.0253239	1
DOC2A	NaN	NaN	NaN	94776	28281	0	2	0	0	50	0	3703293	0.025581	1
INS-IGF2	837088	579	38	45870	15411	0	1	0	0	50	0	1791702	0.0255899	1
PAEP	327501	539	37	44913	11616	0	1	0	0	50	0	1749561	0.0256595	1
LOXHD1	NaN	NaN	NaN	550176	145200	0	2	0	0	50	0	3820212	0.0257588	1
LYZL2	82218	425	28	47487	12210	0	1	0	0	50	0	1835823	0.0258553	1
EBP	726793	NaN	2	54252	15939	0	1	0	0	50	0	2092662	0.0259134	1
SAA1	601955	371	17	29832	7887	0	1	0	0	50	1	1978680	0.0259345	1
IFNA6	232155	466	-14	44319	11913	0	1	0	0	50	0	1704318	0.0259919	1
C11orf17	548433	243	21	50028	14619	0	1	0	0	50	0	1922712	0.0260078	1
PTTG1	197504	619	30	48741	13728	0	1	0	0	50	0	1872090	0.0260235	1
IFNA10	193208	498	-3	44319	12309	0	1	0	0	50	0	1700721	0.0260468	1
RPS5	1900140	270	-14	48708	14256	0	1	0	0	50	0	1859649	0.0261796	1
BANF1	3854361	208	57	21582	5940	0	1	0	0	50	2	2004222	0.0262938	1
PRSS1	285408	636	11	59202	16434	0	1	0	0	50	0	2244792	0.0263605	1
BID	395559	280	-18	57255	16599	0	1	0	0	50	0	2153514	0.0265744	1
MYL6B	2878044	171	40	51183	13662	0	1	0	0	50	0	1921194	0.0266283	1
IQCF1	1013177	370	39	48840	13926	0	2	0	0	50	0	1831896	0.0266483	1
APOC2	1003719	196	6	24585	6897	0	1	0	0	50	1	1586607	0.02665	1
GDF2	NaN	NaN	NaN	98901	29205	0	3	0	0	50	0	3704217	0.0266859	1
CARD16	NaN	NaN	NaN	49962	12606	0	1	0	0	50	0	3687618	0.0267281	1
C3orf57	240601	602	-4	18645	4620	0	1	0	0	50	2	1699401	0.0267856	1
CBFB	1068656	125	48	48807	12078	0	2	0	0	50	3	1886478	0.0270364	1
PABPC4L	NaN	NaN	NaN	100683	27126	0	2	0	0	50	0	3702138	0.0271824	1
KLRC1	382960	334	1	57453	14421	0	1	0	0	50	0	2112561	0.0271824	1
FAM159A	663153	261	19	45309	12606	0	1	0	0	50	0	1655412	0.0273563	1
CXCL9	489826	399	43	30789	8019	0	1	0	0	50	1	1934856	0.0273629	1
GPRIN2	NaN	NaN	NaN	101871	34848	0	1	0	0	50	0	3709860	0.027446	1
DLG3	306369	NaN	30	218229	60159	0	3	0	0	50	1	2208360	0.0275663	1
TRPM8	297512	527	14	267630	70455	0	3	0	0	50	0	1788336	0.027644	1
IQCK	289773	639	13	70653	18051	0	1	0	0	50	0	2547369	0.0277206	1
EVI2B	NaN	NaN	NaN	102795	30954	0	1	0	0	50	0	3705966	0.027723	1
ARF1	702621	391	5	43890	11748	0	1	0	0	50	0	1577169	0.0278138	1
ACP6	NaN	NaN	NaN	103092	28083	0	1	0	0	50	0	3703095	0.0278244	1
SEPX1	1766472	214	39	28776	7161	0	1	0	0	25	0	1032966	0.0278427	1
C1orf95	608933	509	12	33363	9999	0	1	0	0	50	1	2058903	0.0278604	1
ZMYND19	1315685	404	41	54747	14949	0	1	0	0	50	0	1946274	0.028114	1
ELOF1	1152381	272	31	20955	5181	0	1	0	0	50	2	1816287	0.0281542	1
SCN7A	68529	918	-11	406296	103059	0	2	0	0	50	0	2687487	0.0281643	1
CELA2A	554165	212	29	64449	18909	0	1	0	0	50	0	2273502	0.0283322	1
MPZ	735152	293	41	58674	17457	0	1	0	0	50	0	2066130	0.0283823	1
DECR2	1549307	207	37	68409	21582	0	1	0	0	50	0	2405997	0.028417	1
TNP2	632841	308	37	33660	8217	0	2	0	0	50	1	2033559	0.0284543	1
CTRC	554165	212	29	64779	18282	0	1	0	0	50	0	2273502	0.0284774	1
RSPH9	1626879	278	43	65538	18711	0	1	0	0	50	0	2274030	0.028804	1
CTSG	897577	582	3	59400	18414	0	1	0	0	50	0	2054646	0.0288931	1
SLC12A6	498240	193	16	283602	79629	0	3	0	0	50	0	1847439	0.0289656	1
NOC2L	1851188	467	3	179421	50655	0	3	0	0	50	3	2313465	0.0289823	1
FAM101A	1197100	504	34	31581	9603	0	1	0	0	23	0	1081311	0.0291893	1
TRIM77	NaN	NaN	NaN	108570	27159	0	1	0	0	50	0	3702171	0.029309	1
GRPEL2	422727	380	28	52734	15576	0	1	0	0	50	0	1792890	0.029396	1
C19orf40	481910	448	-16	50919	14817	0	1	0	0	50	0	1727484	0.0294587	1
EIF4E1B	579630	359	40	58938	16005	0	1	0	0	50	0	1998018	0.0294808	1
SNF8	793101	174	29	62898	16995	0	1	0	0	50	0	2127972	0.0295398	1
SVOP	574926	NaN	32	72501	21252	0	1	0	0	50	0	2448567	0.0295919	1
DHX29	280901	417	31	330231	86955	0	2	0	0	50	0	2122197	0.0296946	1
SERTAD2	632067	332	25	71907	22044	0	2	0	0	50	0	2418537	0.0297145	1
GNRH2	835590	288	54	28215	9108	0	1	0	0	50	1	1621158	0.0299084	1
SPSB1	980939	281	32	62304	19470	0	1	0	0	50	0	2077449	0.0299728	1
PTP4A2	1200691	128	37	41910	9570	0	1	0	0	50	1	2400156	0.0300056	1
C7orf44	654530	310	38	36498	9141	0	1	0	0	50	1	2053326	0.0305404	1
NDUFV2	419199	391	53	60753	16467	0	1	0	0	50	0	1974291	0.0307524	1
SH2D1B	363646	391	1	32505	8184	0	2	0	0	50	1	1815891	0.0307538	1
CDRT15	96214	975	-61	42867	13860	0	1	0	0	50	0	1392798	0.0307582	1
DOHH	2172733	210	36	68805	22770	0	1	0	0	50	0	2233836	0.0307812	1
PRDX2	1937827	226	32	60456	17457	0	1	0	0	50	0	1955151	0.0309016	1
DNAH14	NaN	NaN	NaN	1100154	278124	0	3	0	0	50	0	3953136	0.0309985	1
AQP2	1033911	220	48	60621	21549	0	1	0	0	50	0	1948023	0.0310988	1
NNMT	162422	499	-4	61974	17721	0	1	0	0	50	0	1988382	0.0311476	1
BIK	624112	241	48	38049	11352	0	1	0	0	50	1	2089164	0.0312008	1
C22orf23	1370748	203	50	53229	13893	0	1	0	0	50	0	1703922	0.031218	1
ZBTB8B	NaN	NaN	NaN	115995	32505	0	1	0	0	50	0	3707517	0.0312658	1
KCTD5	1803069	200	47	56067	15906	0	1	0	0	50	0	1791075	0.0312826	1
TXNRD3IT1	283619	508	43	31350	9240	0	1	0	0	50	1	1708509	0.0315194	1
TMEM85	453823	242	11	44484	11946	0	1	0	0	50	1	2422200	0.0315462	1
LY6D	427585	373	34	29931	9372	0	1	0	0	50	1	1628979	0.0315616	1
UROS	211688	280	-5	65109	17457	0	1	0	0	50	0	2030457	0.0320438	1
SH3BGRL2	205695	824	2	26796	6468	0	1	0	0	50	2	2036166	0.0320737	1
PPIL1	836025	244	43	40095	10692	0	1	0	0	50	1	2146056	0.0320883	1
RABL2B	266017	295	32	60687	14157	0	1	0	0	50	0	1888788	0.0321079	1
MRPL16	395993	494	8	58938	17094	0	1	0	0	50	0	1821930	0.0323264	1
CYTH2	1418188	209	41	97779	25674	0	1	0	0	50	0	3019500	0.0323593	1
REEP3	207194	412	22	62337	16467	0	1	0	0	50	0	1912251	0.0325757	1
C17orf78	498943	171	21	66396	18150	0	1	0	0	50	0	2030160	0.0326813	1
BTG3	101069	479	-5	71478	18711	0	1	0	0	50	0	2169717	0.0329196	1
SLC7A6OS	819579	281	46	73722	20328	0	1	0	0	50	0	2228523	0.0330569	1
IL9R	NaN	NaN	NaN	122760	35442	0	1	0	0	50	0	3710454	0.0330602	1
APOC4	1003719	196	6	30591	8415	0	1	0	0	50	1	1586607	0.0331064	1
PRSS21	1717244	210	42	74085	21450	0	1	0	0	50	0	2234496	0.0331304	1
IGLL5	223193	631	29	49071	15576	0	1	0	0	50	0	1472691	0.0332953	1
GNMT	1200368	259	40	70158	19932	0	1	0	0	50	0	2104839	0.033307	1
GGTLC1	159782	930	-48	53394	15708	0	1	0	0	50	0	1597827	0.0333917	1
ZNF576	441738	209	6	39996	11583	0	1	0	0	50	1	2052798	0.0334514	1
TMEM169	603452	419	35	69201	19701	0	1	0	0	50	0	2058375	0.0335933	1
ARL6IP6	275277	716	6	52173	16434	0	2	0	0	50	1	1872288	0.0336209	1
UCK1	609539	272	36	68673	16467	0	1	0	0	50	0	2028213	0.0338331	1
TMBIM6	1828526	265	67	71907	19569	0	1	0	0	50	0	2109657	0.0340579	1
C22orf43	604420	399	31	59202	13464	0	1	0	0	50	0	1732335	0.0341474	1
C13orf28	191446	610	-22	48939	11847	0	1	0	0	50	1	2454177	0.0342303	1
CRISP3	67784	1246	-2	61248	14586	0	1	0	0	50	0	1787478	0.0342382	1
RPA2	891090	272	20	66231	17424	0	1	0	0	50	0	1930071	0.0342879	1
SNAI3	802673	189	41	66066	21945	0	1	0	0	50	0	1923471	0.0343199	1
SCN2B	707709	293	56	51183	14157	0	1	0	0	50	0	1487376	0.0343842	1
TMEM45B	632501	231	-2	66165	17787	0	1	0	0	50	0	1915716	0.0345102	1
IGFBP4	1202660	149	21	59862	18249	0	1	0	0	50	0	1727220	0.0346301	1
SH2D1A	216982	NaN	-14	30987	8514	0	1	0	0	50	1	1534368	0.0346628	1
YKT6	1492561	412	68	48378	13101	0	1	0	0	50	0	1391247	0.0347449	1
NECAP1	142724	300	23	66264	18678	0	1	0	0	50	0	1904067	0.0347728	1
ENDOG	1768145	201	34	66594	22902	0	1	0	0	50	0	1909776	0.0348419	1
LTC4S	1610057	359	38	34320	12309	0	1	0	0	50	1	1673793	0.0351882	1
PATL2	NaN	NaN	NaN	130779	36729	0	1	0	0	50	0	3711741	0.0352045	1
TBC1D21	358897	439	26	84150	20097	0	1	0	0	50	0	2377089	0.0353713	1
PPP1R3B	159748	526	23	67815	17523	0	1	0	0	50	0	1915287	0.0353771	1
C2orf81	NaN	NaN	NaN	131736	44385	0	1	0	0	50	0	3719397	0.035389	1
VCX	43100	NaN	-9	48807	13068	0	1	0	0	50	0	2700291	0.0354941	1
HIRIP3	NaN	NaN	NaN	131901	35904	0	1	0	0	50	0	3710916	0.0355133	1
MSMB	406207	579	41	31086	4455	0	1	0	0	50	2	2128764	0.0355497	1
AGPAT2	1918290	190	56	64746	20295	0	1	0	0	50	0	1819587	0.035552	1
C1QTNF1	592461	285	15	66759	18183	0	1	0	0	50	0	1872123	0.0356287	1
MAL2	247332	442	-1	40887	13167	0	1	0	0	50	1	1960200	0.0357904	1
BLOC1S1	1814311	384	26	30888	8118	0	1	0	0	50	1	1478136	0.0358551	1
FGF1	293119	481	28	37884	9636	0	2	0	0	50	1	1809126	0.0359297	1
C7orf53	171853	470	-5	31515	8877	0	1	0	0	50	0	1718871	0.0359955	1
POTEC	NaN	NaN	NaN	133617	31614	0	1	0	0	50	0	3706626	0.0360176	1
LMCD1	92154	581	1	86658	24024	0	2	0	0	50	0	2401839	0.0360481	1
HEATR5B	614688	281	16	485166	144078	0	2	0	0	50	0	1785663	0.0361133	1
NOB1	1410481	NaN	39	98142	27885	0	2	0	0	50	0	2709894	0.0361844	1
TMIE	298503	495	41	37125	10692	0	1	0	0	50	1	1758702	0.0362168	1
CIAO1	904852	213	43	81180	22176	0	2	0	0	50	0	2235024	0.0362897	1
CIB1	876945	154	52	46728	12672	0	1	0	0	50	1	2207931	0.0363095	1
SFRS1	854628	182	27	61512	18777	0	1	0	0	50	0	1692042	0.0363217	1
QSER1	408746	172	23	404910	115038	0	2	0	0	50	0	2328579	0.036351	1
ART1	537999	403	23	75702	23298	0	1	0	0	50	0	2080551	0.0363532	1
MCART6	357831	NaN	45	69663	22209	0	1	0	0	50	0	1907961	0.0364792	1
CYBASC3	1394229	286	57	60819	18381	0	1	0	0	50	0	1661220	0.0365779	1
TMEM35	422603	NaN	29	37686	12606	0	1	0	0	50	1	1762992	0.0366703	1
PLSCR2	122649	611	-16	55473	13728	0	1	0	0	50	1	2591523	0.0367209	1
VAMP5	1158965	170	43	27522	8217	0	1	0	0	50	2	1822689	0.0367451	1
YIPF2	2009333	193	41	74448	23265	0	1	0	0	50	0	2022900	0.036769	1
CHAD	1332860	200	23	82533	25773	0	2	0	0	50	0	2241261	0.0367908	1
ZFAND2A	774288	346	36	36828	8118	0	1	0	0	50	1	1716264	0.0368096	1
WRB	383982	346	44	42603	11154	0	1	0	0	50	1	1983597	0.0368428	1
ATP6V1D	484235	291	32	60786	16038	0	1	0	0	50	0	1647327	0.0368663	1
SSX7	250163	NaN	25	48279	10626	0	1	0	0	50	1	2246310	0.0368685	1
OR9G1	NaN	NaN	NaN	69531	21153	0	1	0	0	50	0	3696165	0.0369135	1
PSAT1	248468	637	-20	89496	24057	0	1	0	0	50	0	2420979	0.0369329	1
PPP2R3B	NaN	NaN	NaN	137280	38544	0	1	0	0	50	0	3713556	0.0369337	1
NAPA	794875	276	44	74118	17754	0	1	0	0	50	0	2003562	0.036959	1
RHOC	559669	325	27	46332	12870	0	1	0	0	50	1	2146881	0.0370189	1
PRDX6	426891	390	12	53163	15444	0	1	0	0	50	1	2460810	0.0370572	1
TSPAN7	99411	NaN	23	60192	17028	0	1	0	0	50	0	1622808	0.0370573	1
CCDC75	603425	281	27	66231	14157	0	1	0	0	50	0	1776687	0.0372434	1
HIST1H1B	228884	634	40	51183	16632	0	2	0	0	50	0	1372305	0.0372624	1
EPS15	568927	251	11	227667	57948	0	2	0	0	50	2	2536149	0.0373074	1
C9orf30	245284	516	0	66297	16467	0	1	0	0	50	0	1775037	0.0373151	1
PRR21	315906	569	21	84711	31020	0	2	0	0	50	0	2260698	0.0374355	1
CNFN	792230	218	42	27225	7524	0	1	0	0	50	3	2272050	0.0375883	1
C5orf15	568918	269	60	61743	18051	0	1	0	0	50	0	1630827	0.0378237	1
ADCY9	740126	140	19	314325	91773	0	2	0	0	50	0	1766424	0.0378997	1
OR5AR1	NaN	NaN	NaN	71445	20724	0	1	0	0	50	0	3695736	0.0379156	1
ST8SIA5	292667	608	15	89958	24387	0	1	0	0	50	0	2368740	0.0379402	1
CST5	159399	889	-45	34518	8943	0	1	0	0	50	1	1559811	0.0379502	1
HADH	230614	771	21	79860	21912	0	1	0	0	50	0	2101440	0.0379657	1
SULT1B1	14468	1020	1	74118	16863	0	1	0	0	50	0	1949805	0.0379761	1
C3orf26	267848	573	10	70983	17127	0	1	0	0	50	0	1867206	0.0379784	1
PRSS27	1803069	200	47	68244	20163	0	1	0	0	50	0	1791075	0.0380648	1
SFXN4	789279	149	29	83556	22176	0	1	0	0	50	0	2192685	0.0380697	1
GSX2	77093	472	20	68805	22374	0	1	0	0	50	0	1804473	0.0380929	1
LGALS12	887496	459	31	79728	23826	0	2	0	0	50	0	2090253	0.0381054	1
APOA1BP	2049505	180	37	67452	20559	0	1	0	0	50	0	1768272	0.0381086	1
C22orf25	587146	218	50	67320	18117	0	1	0	0	50	0	1763124	0.0381451	1
DEFB116	562665	594	-29	24948	5940	0	1	0	0	50	2	1590402	0.038156	1
SLFN13	763419	456	18	210738	57552	0	3	0	0	50	1	1780317	0.0383036	1
GPR32	652250	593	27	79893	26037	0	1	0	0	50	0	2082630	0.0383241	1
FAM92B	553233	273	36	73491	19866	0	1	0	0	50	0	1915551	0.0383276	1
RASSF4	75634	905	25	78606	20988	0	1	0	0	50	0	2047914	0.0383453	1
ASAM	713809	216	13	87186	26268	0	2	0	0	50	0	2264559	0.038462	1
PGPEP1L	217299	248	-20	45903	14190	0	1	0	0	50	1	2041083	0.0385618	1
NKX6-2	278505	581	-12	62667	21087	0	1	0	0	50	0	1621785	0.0386019	1
OR51I2	99042	1030	1	71049	22308	0	2	0	0	50	0	1837176	0.0386341	1
LENG1	735613	439	-53	61446	19041	0	1	0	0	50	1	2724876	0.0386647	1
TMEM150C	712807	493	17	60687	16335	0	1	0	0	50	0	1567434	0.0386786	1
GPR35	837485	485	35	68244	23826	0	1	0	0	50	0	1760088	0.0387343	1
EFCAB2	675692	505	10	43857	10395	0	1	0	0	50	1	1931853	0.0389223	1
OR1K1	433740	487	10	69960	24090	0	1	0	0	50	0	1790679	0.0390291	1
RNF125	417722	442	28	56100	15081	0	1	0	0	50	1	2458797	0.0391164	1
DNAJB7	NaN	NaN	NaN	73722	18348	0	1	0	0	50	0	3693360	0.0391236	1
GMFB	466180	371	28	36663	8382	0	1	0	0	50	1	1605417	0.0391514	1
C14orf68	412002	237	37	70290	23661	0	1	0	0	50	0	1793352	0.039154	1
ADAL	823006	415	50	89529	22737	0	1	0	0	50	0	2279310	0.0392383	1
MED27	593548	566	29	74910	20724	0	1	0	0	50	0	1899876	0.0393874	1
TOMM34	952219	282	32	74151	20295	0	1	0	0	50	0	1878492	0.0394327	1
UBE2W	257905	407	34	41250	9735	0	1	0	0	50	1	1792527	0.039449	1
UQCC	1308738	170	50	73689	18975	0	1	0	0	50	0	1857207	0.0396354	1
TNFRSF6B	1126597	202	36	67848	23133	0	1	0	0	50	0	1703955	0.0397757	1
SPDEF	890476	207	34	79695	22077	0	1	0	0	50	0	1993002	0.0399444	1
KCNIP4	35439	1264	3	72963	17424	0	1	0	0	50	0	1824372	0.0399506	1
TCEAL3	490345	NaN	31	47949	12144	0	1	0	0	50	1	2049927	0.0400908	1
ZNF805	NaN	NaN	NaN	149226	38478	0	1	0	0	50	0	3713490	0.0401412	1
DCUN1D1	232043	574	13	65538	14256	0	1	0	0	50	0	1628088	0.0402106	1
C16orf90	805495	246	39	42009	13134	0	1	0	0	50	0	2042799	0.0402817	1
PTRF	2209303	160	31	88671	27852	0	1	0	0	50	0	2180409	0.0406216	1
BAI2	1169755	173	36	368874	114444	0	3	0	0	50	0	1994454	0.0406324	1
NRAS	600650	472	11	46431	11979	0	1	0	0	50	1	1949409	0.0408155	1
RNF215	696089	214	57	86361	29073	0	1	0	0	50	0	2109426	0.0408948	1
KRTAP9-3	996799	468	-7	37983	9735	0	1	0	0	50	1	1588950	0.0409623	1
KIAA0913	1009357	191	42	424248	133221	0	2	0	0	50	0	2276934	0.0411772	1
C14orf182	689076	154	46	26301	6963	0	1	0	0	50	2	1545258	0.0412029	1
FAM20B	352872	244	1	96591	27555	0	1	0	0	50	0	2340030	0.0412305	1
GALM	860461	176	27	80685	23562	0	1	0	0	50	0	1950498	0.0413188	1
WDR82	1114111	181	50	76989	19437	0	1	0	0	50	0	1859253	0.0413609	1
GUCA1C	90728	971	-15	51546	12210	0	1	0	0	50	1	2133780	0.0413905	1
SUN5	461222	461	40	94512	23496	0	1	0	0	50	0	2280795	0.0413907	1
PALM3	NaN	NaN	NaN	154440	47718	0	1	0	0	50	0	3722730	0.0414381	1
ISOC1	38196	985	-2	69168	21417	0	1	0	0	50	0	1663596	0.0415292	1
WDR61	447425	371	54	75207	19635	0	1	0	0	50	0	1805760	0.0415998	1
CXorf30	NaN	NaN	NaN	154704	39138	0	3	0	0	50	0	3714150	0.0416045	1
KIF22	NaN	NaN	NaN	155232	48114	0	1	0	0	50	0	3723126	0.0416456	1
TMEM223	2405109	248	44	44550	16335	0	1	0	0	50	1	1831962	0.0416634	1
ELOVL3	1041024	187	45	64812	16863	0	1	0	0	50	1	2663628	0.0416875	1
AGAP7	NaN	NaN	NaN	155793	43791	0	1	0	0	50	0	3718803	0.0418439	1
CA14	1213150	197	38	81873	22473	0	1	0	0	50	0	1953270	0.0418668	1
ETV2	1162794	390	27	80157	24288	0	1	0	0	50	0	1911921	0.0418758	1
AUH	124246	342	24	80586	24156	0	1	0	0	50	0	1918983	0.0419444	1
HRASLS2	854193	303	56	37653	12144	0	1	0	0	50	1	1531959	0.0421042	1
GPR3	847257	188	26	72501	26202	0	1	0	0	50	0	1717353	0.0421664	1
CALU	852821	304	33	95271	20559	0	1	0	0	50	0	2253702	0.0422228	1
DUSP19	350474	524	20	52140	13794	0	1	0	0	50	1	2115102	0.0422278	1
CCDC154	NaN	NaN	NaN	157443	47487	0	1	0	0	50	0	3722499	0.0422444	1
KLF7	207002	598	20	70719	20460	0	1	0	0	50	0	1669899	0.0422987	1
USF1	689033	250	23	75273	21054	0	1	0	0	50	0	1767777	0.0425289	1
KLK12	490795	632	22	66132	15939	0	1	0	0	50	0	1551660	0.0425683	1
SCAMP3	1574928	194	45	82236	24288	0	1	0	0	50	0	1927695	0.0426085	1
PEX3	318754	401	13	91872	23562	0	2	0	0	50	0	2152590	0.0426279	1
CDC37	1956832	207	38	93159	22176	0	1	0	0	50	0	2178132	0.0427179	1
FAM8A1	470794	339	13	93852	30690	0	1	0	0	50	0	2193807	0.0427282	1
QTRT1	2174644	224	32	95040	28908	0	1	0	0	50	0	2219844	0.0427619	1
POU4F2	38882	987	-10	93423	28743	0	2	0	0	50	0	2179584	0.0428103	1
OR10A5	427462	681	8	72501	21945	0	1	0	0	50	0	1689666	0.0428557	1
BMP2	44205	385	-10	92037	26664	0	1	0	0	50	0	2143878	0.0428773	1
SPINT4	777303	359	16	25080	5808	0	1	0	0	50	3	1829454	0.0428947	1
ZBED2	188186	406	-14	50952	14091	0	1	0	0	50	1	2032635	0.0429319	1
NXPH1	85530	915	-11	64053	17127	0	1	0	0	50	0	2899050	0.0432124	1
ZBED5	NaN	NaN	NaN	161337	44781	0	1	0	0	50	0	3719793	0.0433185	1
DAGLB	NaN	NaN	NaN	161601	43824	0	1	0	0	50	0	3718836	0.0434001	1
DNAJC12	286530	441	-5	50886	12276	0	1	0	0	50	1	2004552	0.0434711	1
HOXA7	356045	385	28	53493	15510	0	1	0	0	50	1	2105268	0.0435118	1
OSCAR	767094	317	-50	74646	26136	0	1	0	0	50	0	1708905	0.0436246	1
IZUMO1	1635420	190	44	85371	22638	0	1	0	0	50	0	1953336	0.0436491	1
GUCY2C	339860	720	4	262416	66858	0	2	0	0	50	1	1657425	0.0436772	1
CMBL	625000	192	9	60192	14850	0	1	0	0	50	2	1990758	0.0437079	1
KHDRBS2	1561	1153	-32	83787	23331	0	1	0	0	50	0	1912185	0.0437611	1
EFCAB5	652131	303	15	377223	94512	0	2	0	0	50	0	1956273	0.0437916	1
NNAT	790368	549	52	19800	6138	0	1	0	0	23	1	769230	0.0440719	1
OR56A3	262387	914	-13	71445	22209	0	1	0	0	50	0	1617825	0.0441039	1
RARRES3	854193	303	56	39468	10923	0	1	0	0	50	1	1531959	0.0441107	1
RAPSN	1022438	245	47	98043	27390	0	1	0	0	50	0	2213937	0.0442268	1
TAAR9	178165	618	22	80487	23166	0	1	0	0	50	0	1817013	0.0442383	1
HOXA6	356045	385	28	54615	15279	0	1	0	0	50	1	2105268	0.0444139	1
STRA13	3814891	211	28	15873	4521	0	1	0	0	14	0	355509	0.0445892	1
CTSL1	122983	577	26	82038	19932	0	1	0	0	50	0	1829718	0.0447762	1
PDK2	1197823	210	20	98472	26664	0	1	0	0	50	0	2194335	0.0448154	1
ARPM1	397180	820	-9	86559	24618	0	1	0	0	50	0	1926408	0.0448726	1
RGS4	315405	691	-14	74547	17424	0	1	0	0	50	0	1658250	0.0448949	1
SSTR4	199022	554	-50	85866	30063	0	2	0	0	50	0	1908555	0.0449296	1
ARMC7	1511891	168	25	45441	14454	0	1	0	0	50	1	1729662	0.0449715	1
ATPAF1	612038	266	23	78606	22275	0	1	0	0	50	0	1741674	0.0450713	1
IL10RB	861800	317	87	79365	20031	0	3	0	0	50	1	2108007	0.0453049	1
DNAJC18	832127	177	48	87384	22209	0	1	0	0	50	0	1925253	0.045326	1
TSGA14	419615	298	27	90750	24486	0	2	0	0	50	0	1998315	0.0453505	1
PROZ	759371	229	38	95667	26400	0	1	0	0	50	0	2103090	0.0454261	1
CHADL	NaN	NaN	NaN	170478	63954	0	1	0	0	50	0	3738966	0.0455324	1
CACNG8	813774	360	-33	94809	33198	0	1	0	0	50	0	2078901	0.0455422	1
SH2D4B	302345	686	-11	89496	23562	0	1	0	0	50	0	1961421	0.0455651	1
FOXI1	94287	650	24	87582	25575	0	1	0	0	50	0	1918026	0.0455992	1
ADAP1	737267	310	41	91278	24057	0	1	0	0	50	0	1997523	0.045632	1
DBNDD2	1037999	382	35	43329	12309	0	1	0	0	50	1	1615515	0.0457004	1
TRIM54	1245306	182	52	96129	26433	0	1	0	0	50	0	2098602	0.045743	1
TOR3A	345937	301	4	93720	26466	0	1	0	0	50	0	2045835	0.0457462	1
IGF1	186749	752	-3	53889	13332	0	1	0	0	50	1	2014320	0.0457857	1
IQCD	417427	252	35	81939	22209	0	1	0	0	50	0	1783518	0.0458777	1
TPPP3	1115833	153	42	42372	11385	0	1	0	0	50	2	2225091	0.0460058	1
GRPR	217879	NaN	19	88638	26499	0	1	0	0	50	0	1920072	0.0460986	1
CUTA	1441897	236	31	49665	16269	0	1	0	0	50	1	1841202	0.0461595	1
S100A8	1140044	401	32	23496	5412	0	1	0	0	50	3	1582020	0.0462011	1
C17orf46	789809	207	23	90486	25839	0	1	0	0	50	0	1952412	0.0462799	1
ZBTB8OS	1441027	144	28	45738	10296	0	1	0	0	50	0	1929543	0.0462859	1
DACT2	NaN	NaN	NaN	173382	58179	0	1	0	0	50	0	3733191	0.0463759	1
ANXA9	1621279	172	30	83589	23925	0	1	0	0	50	0	1796982	0.0464496	1
ASPDH	762018	517	35	68145	22143	0	1	0	0	50	2	2122989	0.0464558	1
OPN3	172337	341	-13	91905	28974	0	2	0	0	50	0	1974126	0.0464876	1
CKM	1280459	215	23	91608	24618	0	1	0	0	50	0	1964490	0.046564	1
NUDT1	814176	430	38	44319	11319	0	1	0	0	50	1	1627791	0.0465864	1
AP4M1	1401098	205	46	107844	32736	0	1	0	0	50	0	2310693	0.0466041	1
HIST1H3E	390169	544	57	30690	10197	0	1	0	0	50	0	1285020	0.0466263	1
RFXANK	940952	232	17	62073	18612	0	1	0	0	50	2	1913736	0.0469348	1
TEAD3	683460	280	36	105138	29106	0	1	0	0	50	0	2231031	0.0470556	1
KLK1	655673	589	25	62832	17259	0	1	0	0	50	1	2284425	0.0470559	1
APOBEC1	237142	672	14	57849	14322	0	1	0	0	50	1	2102529	0.0470721	1
GPR137C	356488	313	14	99660	30426	0	1	0	0	50	0	2111901	0.0471199	1
MS4A1	333232	899	13	71775	19107	0	3	0	0	50	1	1833480	0.0471219	1
C19orf46	984653	303	21	92664	30591	0	2	0	0	50	0	1962246	0.0471533	1
FAM71E1	1038277	491	30	53460	17226	0	1	0	0	50	1	1935846	0.047244	1
LPGAT1	465080	281	13	90255	22704	0	1	0	0	50	0	1907499	0.0472458	1
UROD	939872	310	20	86823	26037	0	1	0	0	50	0	1833513	0.0472828	1
UBA5	210898	768	21	99099	25542	0	2	0	0	50	0	2090847	0.0473263	1
FBXO32	535498	203	19	86889	22011	0	1	0	0	50	0	1829883	0.0474117	1
NGFR	971109	303	31	98736	30360	0	1	0	0	50	0	2079330	0.0474135	1
TMEM178	155474	624	-7	68475	21417	0	1	0	0	50	1	2468400	0.0474545	1
BDH2	350185	454	27	60786	15840	0	1	0	0	50	1	2184336	0.0476027	1
UBR2	1007026	194	42	444543	109461	0	2	0	0	50	0	2198889	0.0476518	1
TMEM9B	548433	243	21	46992	13695	0	1	0	0	50	0	1922712	0.0476885	1
CDH26	73597	856	-36	199518	56595	0	2	1	0	50	3	1864137	0.0477057	1
OR7D2	311030	471	-63	70983	21978	0	1	0	0	50	1	2543112	0.0477442	1
ATP6AP2	456094	NaN	63	84051	23562	0	1	0	0	50	0	1755930	0.0477939	1
PQLC3	491115	255	25	48312	14355	0	1	0	0	50	1	1726692	0.0478584	1
PSMC3	1022438	245	47	106227	29007	0	2	0	0	50	0	2213937	0.0479076	1
RGS5	194452	794	-8	44880	10758	0	1	0	0	50	0	1827441	0.0479137	1
TDGF1	277267	528	52	46200	12507	0	1	0	0	50	1	1648251	0.0479431	1
DLK2	1278255	230	56	88935	27093	0	1	0	0	50	0	1849848	0.0480033	1
C19orf39	1385739	197	31	50754	18150	0	1	0	0	50	0	2060685	0.0480483	1
B3GNTL1	303219	483	14	88407	24057	0	1	0	0	50	0	1837011	0.0480518	1
LASS6	192358	937	21	93357	24552	0	1	0	0	50	0	1935582	0.0481575	1
ADSS	710088	534	2	111012	29469	0	1	0	0	50	0	2300727	0.0481763	1
CHAT	NaN	NaN	NaN	180147	52602	0	1	0	0	50	0	3727614	0.0482525	1
RAD9A	1269888	177	51	92796	27786	0	1	0	0	50	0	1918719	0.0482886	1
ANKH	503265	410	8	116721	34056	0	1	0	0	50	0	2412432	0.0483076	1
CHRNA10	537999	403	23	100980	34749	0	1	0	0	50	0	2080551	0.0484591	1
GCH1	673378	380	40	68046	18777	0	1	0	0	50	1	2399628	0.0484957	1
WWTR1	558006	263	18	94710	26763	0	1	0	0	50	0	1949739	0.0484997	1
ESRRA	1613996	257	65	96030	32274	0	1	0	0	50	0	1976700	0.0485052	1
PRR7	1038665	261	59	61545	20526	0	1	0	0	50	1	2169420	0.0485169	1
CTAGE9	NaN	NaN	NaN	181104	49962	0	1	0	0	50	0	3724974	0.0485425	1
ACTL6B	1884430	247	60	103587	28380	0	1	0	0	50	0	2129985	0.0485566	1
GRB7	1448852	226	36	126786	37059	0	1	0	0	50	0	2600895	0.0486703	1
TNFRSF10A	633411	240	42	110418	32439	0	1	0	0	50	0	2264955	0.0486741	1
WNT1	1737773	214	55	84084	27291	0	1	0	0	50	0	1721643	0.0487622	1
JOSD2	762018	517	35	42900	14817	0	1	0	0	50	2	2122989	0.0487626	1
MACROD2	37709	920	-12	114873	25212	0	1	0	0	50	0	2349369	0.0488176	1
SERPINF1	1447501	189	32	98109	29106	0	1	0	0	50	0	2000361	0.0489672	1
HSPB6	1151198	321	30	35937	12870	0	1	0	0	50	2	1770549	0.0489747	1
MED14	479033	NaN	63	344685	99330	0	2	0	0	50	0	1678611	0.0489903	1
RAB39B	371405	NaN	-13	49599	14355	0	1	0	0	50	0	1968912	0.0491154	1
ZNF665	392290	946	-49	162393	40458	0	2	0	0	50	2	1546644	0.0491636	1
ELFN1	NaN	NaN	NaN	184503	61710	0	1	0	0	50	0	3736722	0.0492956	1
FAM134C	1884163	177	38	109131	33033	0	1	0	0	50	0	2208657	0.0493304	1
LCMT1	273088	418	23	82434	21021	0	1	0	0	50	0	1666434	0.0493869	1
OPN4	352918	192	27	114378	35112	0	1	0	0	50	0	2308284	0.0494706	1
MMP13	374035	482	-10	114873	29073	0	1	0	0	50	0	2318019	0.0494758	1
C9orf150	77482	482	-32	52866	15543	0	1	0	0	50	1	1820940	0.0496358	1
HBP1	249919	627	12	125631	31284	0	2	0	0	50	0	2525985	0.049654	1
RPS6	498767	339	12	59697	16929	0	1	0	0	50	0	2342175	0.0496792	1
AP4S1	432061	238	23	50292	12177	0	1	0	0	50	1	1730388	0.0496895	1
BPHL	444075	435	41	69498	19800	0	1	0	0	50	1	2386032	0.0497959	1
KLF11	922437	234	42	117315	36432	0	1	0	0	50	0	2346894	0.0499045	1
SPOCK3	7931	1043	-11	109098	24849	0	2	0	0	50	0	2180574	0.0499487	1
MPI	764533	195	46	100188	28710	0	1	0	0	50	0	1995576	0.0501215	1
LPAR1	247269	624	21	84777	24519	0	1	0	0	50	0	1686828	0.050174	1
CABP7	848649	195	37	52107	13827	0	1	0	0	50	1	1775169	0.0501776	1
TMEM98	443753	833	-6	53394	16401	0	1	0	0	50	1	1818069	0.0502034	1
PURG	339429	549	-11	89265	24882	0	1	0	0	50	0	1769526	0.0503608	1
CPA1	419615	298	27	100881	27819	0	1	0	0	50	0	1998315	0.0503973	1
PIAS4	2296242	207	29	120747	35178	0	1	0	0	50	0	2391279	0.0504094	1
KRTAP4-3	996799	468	-7	46860	11352	0	1	0	0	50	1	1588950	0.0504102	1
C18orf62	63196	1063	-18	24684	6600	0	1	0	0	50	2	1713789	0.0504617	1
NAV1	778347	223	27	441144	133551	0	2	0	0	50	0	2112792	0.0504647	1
VNN1	127166	569	2	121572	33660	0	1	0	0	50	0	2401872	0.0505295	1
MTERFD3	156112	473	21	90750	24288	0	1	0	0	50	0	1791537	0.0505688	1
TBPL2	729264	159	37	88539	25509	0	1	0	0	50	0	1747713	0.0505738	1
ANXA2	431518	299	14	89232	22440	0	1	0	0	50	0	1760847	0.0505895	1
SAMD14	1237828	210	23	103884	32538	0	1	0	0	50	0	2047881	0.050641	1
COL24A1	263693	863	-12	411774	121143	0	2	0	0	50	0	1967691	0.0506668	1
MPDZ	77490	688	-36	485562	138534	0	6	0	0	50	0	2317557	0.0507729	1
CYB561D2	843769	206	51	49467	17952	0	1	0	0	50	0	1897764	0.0507772	1
FRG2B	50016	525	-16	65802	18348	0	1	0	0	50	1	2212287	0.0508362	1
ZC3H10	2878044	171	40	97845	31746	0	1	0	0	50	0	1921194	0.0508419	1
PSMB3	1198833	207	37	50193	13365	0	1	0	0	50	1	1685310	0.0509015	1
ACR	669934	295	41	96822	30492	0	1	0	0	50	0	1897995	0.0509252	1
CFP	775214	NaN	38	111441	31911	0	3	0	0	50	0	2184039	0.0509368	1
RASA4	NaN	NaN	NaN	190575	56331	0	1	0	0	50	0	3731343	0.0509855	1
MYH9	1223952	226	49	473847	124410	0	3	1	0	50	1	2164965	0.0511573	1
HM13	741997	309	-33	106986	31614	0	1	0	0	50	0	2085435	0.0512121	1
KRTAP1-3	977588	404	10	39699	10395	0	1	0	0	50	1	1323399	0.0512642	1
GPR63	130400	1336	-5	96096	28644	0	1	0	0	50	0	1866711	0.0513881	1
C1orf74	220312	429	18	60720	19866	0	1	0	0	50	1	2018511	0.0514056	1
C1orf58	221959	236	-1	101574	25740	0	1	0	0	50	0	1972311	0.0514096	1
UBAC2	333101	390	55	98340	22935	0	2	0	0	50	2	1888161	0.0514387	1
RAD51L1	446885	404	37	95172	26895	0	2	0	0	50	3	2175789	0.0514601	1
HSF1	2525749	200	28	125334	36828	0	1	0	0	50	0	2426919	0.0515523	1
PPAN	NaN	NaN	NaN	98109	27522	0	1	0	0	50	0	3702534	0.0515958	1
CRLS1	301141	290	4	71016	22143	0	1	0	0	50	1	2336829	0.051672	1
NKD1	307084	646	-6	111408	32043	0	1	0	0	50	0	2150115	0.051723	1
ACTR3	402980	629	15	102069	26730	0	1	0	0	50	0	1969440	0.0517343	1
MND1	202295	238	27	52668	11484	0	1	0	0	50	1	1736559	0.0518222	1
SPIN1	126591	495	-6	63327	16368	0	1	0	0	50	1	2086623	0.0518563	1
SGK2	345777	303	4	102531	28941	0	1	0	0	50	0	1972410	0.0518894	1
SCN1A	98532	550	-11	480777	126291	0	2	0	0	50	0	2265912	0.0519221	1
XPNPEP3	969480	269	43	121143	33495	0	1	0	0	50	0	2320758	0.0521057	1
OPN1LW	2438903	NaN	17	86097	24486	0	1	0	0	50	1	2822820	0.0521117	1
THRB	370625	518	-12	111837	28545	0	1	0	0	50	0	2139555	0.0521772	1
UBP1	483698	352	9	133122	33891	0	2	0	0	50	0	2536149	0.0523938	1
GORASP1	213514	500	30	102729	31614	0	1	0	0	50	0	1955877	0.0524269	1
BCMO1	302391	288	1	132066	34650	0	1	0	0	50	0	2512653	0.0524646	1
PORCN	726793	NaN	2	110286	32472	0	1	0	0	50	0	2092662	0.0526047	1
CDK5	622098	373	41	71775	19602	0	1	0	0	50	1	2330460	0.0526139	1
DDX47	742991	129	27	108999	30987	0	1	0	0	50	0	2067615	0.0526207	1
NXPH4	2162032	238	58	69003	23166	0	1	0	0	50	1	2232813	0.0527916	1
POU2AF1	238940	567	19	58641	19272	0	1	0	0	50	1	1894695	0.0528695	1
UEVLD	630607	341	24	114642	30096	0	1	0	0	50	0	2163546	0.05289	1
PCNP	549032	445	14	43362	11583	0	1	0	0	50	2	1964952	0.0529609	1
TMEM91	1193025	249	33	47553	14223	0	1	0	0	50	1	1530804	0.0530611	1
FBXO4	113456	795	23	95106	25080	0	1	0	0	50	0	1787379	0.0531103	1
C5orf33	184013	476	2	105798	30129	0	1	0	0	50	0	1984785	0.0532044	1
CLEC9A	351158	445	9	60687	13563	0	1	0	0	50	1	1944921	0.0532949	1
C19orf26	2214581	234	29	101904	34320	0	1	0	0	50	0	1898952	0.0535613	1
SPANXN5	476232	NaN	26	18051	4026	0	1	0	0	19	1	575124	0.0536037	1
CT62	276800	462	10	32274	9207	0	2	0	0	50	2	2105763	0.0536092	1
SPSB4	245950	574	22	60885	20889	0	1	0	0	50	1	1939113	0.0536239	1
CRIP3	1293543	363	51	50721	12936	0	1	0	0	50	2	2267001	0.0536763	1
FAM153C	961008	363	32	30129	7194	0	1	0	0	50	3	1738242	0.0536863	1
EFS	1220624	456	31	124311	44583	0	1	0	0	50	0	2308515	0.053746	1
DKKL1	2183690	309	30	56397	17556	0	1	0	0	50	4	2002539	0.0537717	1
TNFRSF9	381467	207	24	62667	16137	0	1	0	0	50	1	1982508	0.0538397	1
MPND	2122615	220	27	119394	34848	0	1	0	0	50	0	2211495	0.053884	1
C5orf34	490107	369	10	154308	40227	0	1	0	0	50	0	2857767	0.0538925	1
CDK3	1639614	194	22	72567	21087	0	1	0	0	50	1	2296074	0.0539715	1
SNRPC	995432	242	24	39633	9867	0	1	0	0	50	2	1759890	0.0540187	1
KRT85	936407	213	42	119262	34782	0	2	0	0	50	0	2197173	0.0541746	1
OAZ3	1062482	255	29	66297	19140	0	1	0	0	50	1	2078538	0.0543185	1
IFLTD1	200328	517	1	106656	27588	0	1	0	0	50	0	1958616	0.0543485	1
UBE2M	2673870	276	11	45111	11517	0	1	0	0	50	1	2244825	0.0543685	1
DAPK3	2173603	207	30	107085	31020	0	1	0	0	50	0	1964655	0.054399	1
NR2F1	263987	505	-1	97317	29403	0	1	0	0	50	0	1783749	0.0544506	1
STX1A	1082063	214	54	73656	15939	0	1	0	0	50	1	2296965	0.0546041	1
SIRT7	3798594	211	19	93720	29139	0	1	0	0	50	0	1712799	0.0546099	1
GYG1	356219	442	8	92433	20328	0	1	0	0	50	0	1689072	0.0546165	1
AIP	1392213	215	53	78474	21813	0	1	0	0	50	0	1432662	0.0546666	1
COPS7B	955894	365	41	63459	17622	0	1	0	0	50	1	1975941	0.0546867	1
RNF138	409393	481	23	61281	14751	0	1	0	0	50	2	2682306	0.0547803	1
TRMT61A	900930	225	38	65604	21714	0	1	0	0	50	1	2038014	0.0548112	1
OR7C2	961949	546	4	72105	22836	0	1	0	0	50	1	2236311	0.0548992	1
GIF	366560	494	8	99726	27786	0	1	0	0	50	0	1812657	0.0549066	1
C12orf24	922262	206	43	66825	16929	0	1	0	0	50	1	2069958	0.0549669	1
YIPF6	201571	NaN	12	56793	16170	0	1	0	0	50	1	1756128	0.0550617	1
IL19	466144	357	34	52767	13563	0	1	0	0	50	1	1626537	0.0550922	1
CDC42BPG	2740031	204	61	360987	114213	0	3	1	0	50	1	2475594	0.055113	1
WDR85	1315685	404	41	107547	30162	0	1	0	0	50	0	1946274	0.0551465	1
GNB5	540700	195	21	97152	25410	0	1	0	0	50	0	1752036	0.0553387	1
PMS2	NaN	NaN	NaN	207042	55011	0	1	0	0	50	0	3730023	0.0553938	1
F7	789162	285	14	110154	31911	0	1	0	0	50	0	1981056	0.0554904	1
ISG15	1971475	239	15	37554	12342	0	1	0	0	50	2	2363955	0.0555112	1
LILRA1	978578	625	-1	114378	34716	0	1	0	0	50	0	2054019	0.0555715	1
ARHGEF33	NaN	NaN	NaN	208197	56628	0	1	0	0	50	0	3731640	0.0556779	1
ASTL	821367	251	45	100386	30987	0	1	0	0	50	0	1796256	0.0557714	1
FIBIN	176115	648	-17	48906	14058	0	1	0	0	50	1	2369367	0.0558019	1
SHH	213448	634	23	103290	35211	0	1	0	0	50	0	1846680	0.0558177	1
RFXAP	191525	731	-15	63195	18678	0	1	0	0	50	0	2191431	0.0560194	1
SAMD12	190644	575	17	50127	13530	0	1	0	0	50	1	1520640	0.0561066	1
CACNG6	806175	338	-40	58377	20328	0	1	0	0	50	1	1770615	0.0561156	1
GAL3ST4	1299015	205	52	108900	36531	0	1	0	0	50	0	1931985	0.0562489	1
TRAF2	1950713	176	39	119790	33264	0	1	0	0	50	0	2124903	0.0562568	1
ROPN1B	215425	583	27	50919	14322	0	1	0	0	50	2	2168133	0.0562707	1
PHB2	2704950	211	47	71445	20823	0	1	0	0	50	0	2465892	0.0562759	1
OR52K2	264090	862	-7	71115	22836	0	1	0	0	50	1	2147013	0.056371	1
ONECUT3	NaN	NaN	NaN	107910	39402	0	1	0	0	50	0	3714414	0.0564234	1
NECAB2	494952	460	3	93720	26169	0	1	0	0	50	0	1657326	0.0564302	1
TSR2	296262	NaN	5	46398	12408	0	1	0	0	50	0	1594032	0.0565285	1
ATM	415837	582	16	745701	186780	0	5	0	0	50	0	2162589	0.0566843	1
LAX1	515575	280	39	97944	26400	0	1	0	0	50	0	1720983	0.0567905	1
PPP1R8	717145	218	26	82962	24156	0	1	0	0	50	1	2485329	0.0568023	1
ALKBH2	595266	487	20	61050	18051	0	1	0	0	50	1	1825230	0.0569147	1
PCDHGA12	NaN	NaN	NaN	213609	68145	0	1	0	0	50	0	3743157	0.0569445	1
MEX3A	2005405	213	39	115203	39930	0	1	0	0	50	0	2017851	0.0569695	1
DYNC1LI2	804191	145	10	118503	32868	0	1	0	0	50	0	2074710	0.0569956	1
IDI1	338115	407	30	68508	17721	0	1	0	0	50	1	2044515	0.0570154	1
UPK1B	222933	588	0	64185	16104	0	3	0	0	50	3	1898721	0.0570669	1
RBM42	1162794	390	27	109362	37257	0	2	0	0	50	0	1911921	0.0570771	1
SYT15	165245	269	20	103059	30591	0	1	0	0	50	0	1801338	0.0570898	1
GAPDHS	1081638	390	41	96525	28908	0	1	0	0	50	0	1685706	0.0571378	1
SLC14A1	381180	401	25	105501	30525	0	1	0	0	50	0	1842093	0.0571492	1
NAA40	1322584	277	42	59367	14091	0	1	0	0	50	2	2483811	0.0572404	1
CD34	320873	450	22	90849	28248	0	1	0	0	50	1	2695638	0.0573397	1
IL15RA	650283	305	32	62106	19866	0	1	0	0	50	2	2591721	0.0573842	1
TAF7L	404269	NaN	29	115731	26730	0	2	0	0	50	0	2010888	0.0574274	1
TRIT1	996021	270	31	112761	30393	0	1	0	0	50	0	1955613	0.0575343	1
ATP6AP1	2277674	NaN	40	109956	33693	0	1	0	0	50	0	1906806	0.057539	1
MS4A10	744779	621	23	64053	18315	0	1	0	0	50	0	2159619	0.057569	1
HPCA	1019374	232	15	47091	11715	0	1	0	0	50	2	1957527	0.0576014	1
PROCA1	1695792	208	40	80289	21186	0	1	0	0	50	1	2365473	0.0577403	1
PPM1K	432936	304	25	88539	24618	0	2	0	0	50	0	1529583	0.0577571	1
CHKA	1168866	251	63	111012	29370	0	1	0	0	50	0	1917498	0.0577669	1
PCYT2	3798594	211	19	99231	27093	0	1	0	0	50	0	1712799	0.0578076	1
RILPL1	1039355	424	49	96030	26334	0	1	0	0	50	2	2409462	0.0578311	1
PCDHA11	NaN	NaN	NaN	217569	69630	0	1	0	0	50	0	3744642	0.057972	1
F10	774267	229	26	117777	30624	0	1	0	0	50	0	2026992	0.0579756	1
TULP1	683460	280	36	129789	37224	0	1	0	0	50	0	2231031	0.058045	1
KIAA0895	342379	285	17	126390	33594	0	1	0	0	50	0	2171268	0.0580802	1
FAM13C	121813	707	-15	142263	37125	0	1	0	0	50	0	2442099	0.0581248	1
PDDC1	1788356	193	48	53196	15411	0	1	0	0	50	0	1775796	0.0581268	1
ZBTB44	658636	276	18	107250	29568	0	2	0	0	50	0	1839882	0.0581618	1
PSG8	386041	417	-19	102003	28677	0	1	0	0	50	0	1748802	0.058197	1
EHD2	812020	262	36	125763	37785	0	1	0	0	50	0	2152953	0.0582834	1
FGF9	298481	648	37	49005	13860	0	1	0	0	50	0	1629309	0.0583549	1
SCPEP1	333715	254	-10	110187	29304	0	1	0	0	50	0	1881825	0.0584218	1
OR1J2	373314	646	3	71247	21912	0	1	0	0	50	1	2071707	0.0584895	1
ITPRIPL1	904852	213	43	131043	38247	0	2	0	0	50	0	2235024	0.0584993	1
ADHFE1	259302	268	12	111276	33066	0	1	0	0	50	0	1894959	0.0585897	1
BAIAP2L1	609918	249	36	124212	33000	0	1	0	0	50	0	2112231	0.0586725	1
C20orf46	442604	527	22	56826	19899	0	1	0	0	50	1	2613666	0.058688	1
OR2Z1	536422	487	-47	70356	23100	0	1	0	0	50	2	2867766	0.0587115	1
LYG1	386109	630	24	46992	12903	0	1	0	0	50	1	2159751	0.0587309	1
FAM9B	47340	NaN	-11	48906	9603	0	1	0	0	50	2	2900436	0.0588185	1
RDH8	1555841	413	0	71478	23166	0	1	0	0	50	1	2065569	0.058847	1
RAB6B	530925	520	25	51876	12969	0	1	0	0	50	1	1495923	0.05897	1
MS4A12	333232	899	13	63624	18348	0	1	0	0	50	1	1833480	0.0590081	1
MRPL47	397411	520	10	61281	15840	0	1	0	0	50	1	1764972	0.0590407	1
GUCY1A2	63799	885	-21	171534	48939	0	3	0	0	32	1	984357	0.0591954	1
ZNHIT6	277976	411	-20	115962	27489	0	1	0	0	50	0	1952907	0.0592418	1
RBP4	450249	305	20	49269	12705	0	1	0	0	50	2	1987788	0.0592981	1
FLNA	2356905	NaN	27	620004	184668	0	2	0	0	50	0	2709630	0.0593077	1
SNRNP200	904852	213	43	511434	140679	0	2	0	0	50	0	2235024	0.0593131	1
ATF7	1542915	154	52	115665	35706	0	2	0	0	50	0	1945251	0.0593223	1
IFT57	289544	711	11	105171	26499	0	1	0	0	50	0	1766721	0.0593906	1
FAM83A	519858	171	22	104973	32637	0	1	0	0	50	0	1762497	0.0594209	1
ANP32D	904892	390	11	30921	8184	0	1	0	0	50	1	1402137	0.0595021	1
PPP3CB	966152	220	40	128205	33165	0	1	0	0	50	0	2149257	0.0595117	1
TMEM65	330177	445	14	56298	17655	0	1	0	0	50	1	1607958	0.0595268	1
RBM9	1264586	388	-26	115632	27621	0	1	0	0	50	0	1937760	0.0595339	1
IQCG	612221	410	33	110154	25674	0	2	0	0	50	0	1843545	0.0596112	1
KLC3	1280459	215	23	117711	37224	0	1	0	0	50	0	1964490	0.0597783	1
SDHB	678965	221	52	68442	17787	0	1	0	0	50	1	1942875	0.059886	1
NUP62	1679101	205	45	115797	39930	0	2	0	0	50	0	1926738	0.0599579	1
PCDHA10	NaN	NaN	NaN	225423	71775	0	1	0	0	50	0	3746787	0.0600208	1
CCS	1343990	194	62	65505	19140	0	1	0	0	50	1	1854138	0.0600559	1
DUOXA2	667418	544	27	90420	26895	0	1	0	0	50	1	2557071	0.0601085	1
B4GALT7	1316033	475	42	76824	22770	0	1	0	0	50	1	2171829	0.060129	1
WDR34	1891397	197	41	123783	39270	0	1	0	0	50	0	2053359	0.0601396	1
PEX14	819616	392	27	89991	25641	0	3	0	0	50	1	2549811	0.0601693	1
AGPAT9	186399	436	21	104742	28809	0	1	0	0	50	0	1735074	0.0602232	1
HSD17B7	336864	396	12	82236	22704	0	1	0	0	50	1	2320626	0.0602358	1
ALG1	552298	419	3	111078	31977	0	2	0	0	50	0	1838826	0.0602626	1
PACSIN2	627533	222	56	119526	29073	0	1	0	0	50	0	1977261	0.0603055	1
PHF23	1782958	316	21	93225	28347	0	1	0	0	50	0	1540671	0.0603643	1
GLO1	280153	845	28	45969	10956	0	1	0	0	50	3	2348742	0.0603851	1
SLC25A42	1293709	215	30	73887	23628	0	1	0	0	50	1	2077614	0.0604466	1
FBXW7	117295	501	51	201432	53988	0	2	0	0	50	1	2225487	0.0604737	1
KYNU	48515	369	20	116292	30030	0	1	0	0	50	0	1916970	0.0605184	1
CD48	1156068	634	26	58245	15609	0	1	0	0	50	1	1634325	0.0605719	1
FBXL20	1467668	179	20	106359	28974	0	1	0	0	50	0	1751442	0.0605798	1
OR4D11	430021	507	-1	70191	22473	0	1	0	0	50	1	1968978	0.0605884	1
ACOT9	473183	NaN	48	112134	27159	0	1	0	0	50	0	1845525	0.0606134	1
TXNDC5	748889	288	10	102531	29832	0	2	0	0	50	3	2549745	0.0606273	1
OR4D10	430021	507	-1	70257	22407	0	1	0	0	50	1	1968978	0.0606445	1
SERPINE2	314351	346	11	98208	27027	0	1	0	0	50	1	1968285	0.060671	1
KRT13	1445853	325	-22	107679	31614	0	1	0	0	50	0	1770384	0.0606751	1
IL4I1	1676173	205	41	137643	42042	0	1	0	0	50	0	2260236	0.0607501	1
LIF	548674	211	43	46926	14157	0	1	0	0	50	2	1846614	0.0607519	1
FOLR3	715293	267	62	59961	14685	0	1	0	0	50	1	1677225	0.0607579	1
ZC4H2	98165	NaN	-21	58542	11748	0	1	0	0	50	1	1637196	0.0607701	1
CENPB	860065	241	43	135894	42306	0	1	0	0	50	0	2229777	0.0607971	1
STK33	314196	551	13	126687	30624	0	2	0	0	50	0	2075634	0.0608866	1
CACNG2	1202913	359	42	75702	21714	0	1	0	0	50	1	2112693	0.0608946	1
ATL2	808394	366	25	149985	39303	0	1	0	0	50	0	2456520	0.0609063	1
PYROXD2	142644	581	4	138072	40920	0	1	0	0	50	0	2258058	0.0609967	1
CD1E	135429	902	5	93588	23925	0	1	0	0	50	0	1529781	0.0610275	1
KRT36	1445853	325	-22	108537	32835	0	1	0	0	50	0	1770384	0.0611563	1
PCGF3	672497	312	27	61050	14289	0	1	0	0	50	2	2383920	0.0612093	1
SMOC1	607548	307	41	105237	28611	0	1	0	0	50	0	1713129	0.0612779	1
FOXB2	180535	713	-10	96393	32208	0	1	0	0	50	1	2672373	0.0612911	1
SLC35D2	340302	400	21	81609	23331	0	1	0	0	50	1	2257530	0.0614238	1
EIF2B4	1245306	182	52	129393	40491	0	2	0	0	50	0	2098602	0.0615034	1
ENTPD7	422578	304	12	143352	41085	0	1	0	0	50	0	2324322	0.0615212	1
TTLL5	415501	540	40	309111	83919	0	2	0	0	50	1	1682010	0.0615266	1
PARM1	175795	775	18	70191	23364	0	1	0	0	50	1	1937529	0.0615529	1
OR5A1	430021	507	-1	71412	22440	0	1	0	0	50	1	1968978	0.061622	1
GJC3	1584669	391	36	63657	19899	0	1	0	0	50	1	1753620	0.0616748	1
PRSS16	161388	645	24	118767	38742	0	1	0	0	50	0	1920501	0.0616866	1
BEGAIN	402460	304	5	136488	42306	0	1	0	0	50	0	2206644	0.0616982	1
C15orf27	374349	405	22	125664	36300	0	1	0	0	50	0	2030391	0.0617366	1
RPGRIP1L	248316	406	-15	321816	79332	0	2	0	0	50	1	1710753	0.0617537	1
HIST1H2BC	398813	636	53	28974	8943	0	1	0	0	50	1	1264197	0.0617651	1
OR10H2	878287	605	13	71115	23133	0	1	0	0	50	1	1954062	0.0618298	1
GMEB1	817267	128	27	136818	37719	0	1	0	0	50	0	2206842	0.0618411	1
ERLEC1	NaN	NaN	NaN	118437	30459	0	1	0	0	50	0	3705471	0.0618961	1
CXorf26	102519	NaN	16	57453	14025	0	1	0	0	50	2	2215752	0.0619521	1
ZNF346	1195948	218	40	72204	17985	0	1	0	0	50	1	1979043	0.0619813	1
TMEM106C	374433	246	47	60357	16962	0	1	0	0	50	1	1651353	0.0620911	1
GDF5	1521661	167	53	112794	36696	0	1	0	0	50	0	1811799	0.0620976	1
OR10H1	808269	590	18	72303	22836	0	1	0	0	50	0	2253801	0.0621167	1
SRM	577167	408	34	73095	19866	0	1	0	0	50	1	1998381	0.0621359	1
ZFAND3	303392	630	32	55209	14487	0	1	0	0	50	1	1507473	0.062213	1
CCBP2	335379	396	26	88374	26367	0	1	0	0	50	1	2411640	0.0622485	1
EEF1A2	1262904	298	54	108834	31746	0	1	0	0	50	0	1743423	0.0622661	1
TMEM50B	884788	182	63	39798	9801	0	1	0	0	50	2	1524468	0.0623618	1
RAB6C	342211	671	4	58575	17160	0	1	0	0	50	0	1818201	0.0623701	1
SLC39A9	857161	395	40	71280	22572	0	1	0	0	50	1	1935087	0.0625662	1
FDXR	1027517	320	20	115566	36894	0	1	0	0	50	0	1842324	0.0625674	1
FAM122C	293030	NaN	27	91443	24486	0	1	0	0	50	1	2480181	0.0626233	1
FBRSL1	NaN	NaN	NaN	235851	81147	0	1	0	0	50	0	3756159	0.0626287	1
CTSK	1818753	188	35	79926	20757	0	1	0	0	50	1	2166879	0.062649	1
DNAJB2	694442	193	44	78375	22605	0	1	0	0	50	1	2123253	0.0626949	1
BTN2A2	378286	330	51	123189	35211	0	1	0	0	50	0	1958946	0.0627226	1
LECT1	288742	469	24	80553	21318	0	1	0	0	50	1	2180871	0.0627338	1
CD55	500581	191	20	106260	28677	0	1	0	0	50	0	1686630	0.0628382	1
RXFP4	1880483	213	32	81873	29601	0	1	0	0	50	1	2206512	0.0630152	1
ASB9	204248	NaN	17	73194	19866	0	1	0	0	50	1	1972311	0.0630242	1
TMEM104	1005466	320	19	116094	35079	0	1	0	0	50	0	1835097	0.0630975	1
ZNF512	1192074	306	43	138534	35508	0	1	0	0	50	1	2671020	0.0631048	1
GJB4	548013	580	19	60555	18744	0	1	0	0	50	1	1629375	0.0631142	1
SIGLEC15	384767	380	42	74778	24915	0	1	0	0	50	1	2006037	0.0631187	1
SARS	1000045	287	32	124179	32934	0	1	0	0	50	0	1959870	0.0631946	1
GPC5	12353	1007	-9	135201	37752	0	1	0	0	50	0	2132328	0.0632385	1
ZNF727	NaN	NaN	NaN	121077	28413	0	1	0	0	50	0	3703425	0.0632642	1
DAO	494991	393	49	83655	23661	0	1	0	0	50	1	2238159	0.0632846	1
LAMP3	296133	596	24	95964	29865	0	1	0	0	50	1	2571855	0.063361	1
ACAT1	417904	695	19	102564	29106	0	1	0	0	50	1	2747877	0.0633807	1
PGC	429684	341	47	115599	33693	0	1	0	0	50	0	1817640	0.0634302	1
ANGPTL5	416999	514	-21	95766	22935	0	1	0	0	50	1	2561097	0.0634931	1
KRT72	1280474	464	36	121143	34683	0	1	0	0	50	0	1902747	0.0634986	1
ANKRD34C	NaN	NaN	NaN	121902	37686	0	1	0	0	50	0	3712698	0.0635276	1
MRPL49	3267059	207	46	39171	11814	0	1	0	0	50	3	1898688	0.0635351	1
C4orf50	109875	686	16	64911	19932	0	1	0	0	50	1	1734051	0.0635611	1
ANGPT2	NaN	NaN	NaN	121902	28875	0	1	0	0	50	0	3703887	0.0636736	1
GNS	441663	484	28	133122	36267	0	1	0	0	50	0	2084841	0.0636829	1
RARG	1677275	191	49	118569	34485	0	1	0	0	50	0	1856580	0.0636941	1
PCYOX1L	422727	380	28	114807	34386	0	1	0	0	50	0	1792890	0.0638638	1
SLC22A16	248863	469	20	135795	38841	0	1	0	0	50	0	2118501	0.0639274	1
PHYH	246468	433	33	82929	21120	0	1	0	0	50	1	2202387	0.0639293	1
GOT1L1	660779	379	37	90321	24222	0	1	0	0	50	1	2397714	0.0639545	1
SAMD3	84835	891	27	128997	31284	0	1	0	0	50	0	2010063	0.0640028	1
MCCC2	436559	600	36	136323	37521	0	1	0	0	50	0	2123055	0.064038	1
ISG20L2	1851672	180	37	82137	23793	0	1	0	0	50	1	2176086	0.0640805	1
HAAO	344647	338	34	69333	19668	0	1	0	0	50	1	1832556	0.0642279	1
KLHL21	628180	259	38	134838	44154	0	1	0	0	50	0	2089824	0.0643457	1
DKK4	535273	459	37	53229	14982	0	1	0	0	50	2	1973994	0.0643498	1
FBXW8	208959	359	16	141471	40590	0	2	0	0	50	1	1642245	0.0643534	1
SYP	724395	NaN	44	74184	21648	0	1	0	0	50	1	1954920	0.0644166	1
SAMHD1	817783	225	47	153483	39072	0	1	0	0	50	0	2375307	0.06444	1
TMEM8B	847663	227	54	123750	39501	0	1	0	0	50	0	1914594	0.064459	1
AMICA1	707709	293	56	96195	26169	0	1	0	0	50	0	1487376	0.0644983	1
HAGH	1604603	288	36	73062	21879	0	1	0	0	50	1	1920402	0.0645789	1
ANKRD13D	1369264	177	44	143286	42240	0	1	0	0	50	0	2212584	0.0645824	1
TSPAN9	523539	476	24	58542	15510	0	1	0	0	50	1	1535985	0.0646932	1
ANKRD40	1585602	196	18	85899	25278	0	1	0	0	50	1	2251260	0.0647632	1
ANKRD18A	NaN	NaN	NaN	242583	58476	0	1	0	0	50	0	3733488	0.064796	1
ESD	272205	820	63	70059	17160	0	2	0	0	50	1	1900041	0.0648227	1
SRMS	1262904	298	54	113355	35046	0	1	0	0	50	0	1743423	0.0648391	1
MSTN	508463	478	28	88770	23694	0	1	0	0	50	1	2321187	0.0649089	1
HOXB5	946208	524	29	62337	18447	0	1	0	0	50	1	1628187	0.0649797	1
ANXA4	864962	193	50	79497	20889	0	1	0	0	50	1	2072169	0.0651096	1
CEACAM21	1044508	451	31	69696	19998	0	2	0	0	50	1	1879845	0.0651722	1
SLC26A10	1329939	344	52	129690	43164	0	2	0	0	50	2	2285316	0.0652115	1
KRT74	1280474	464	36	124509	36267	0	1	0	0	50	0	1902747	0.0652533	1
PEMT	958193	236	12	55902	17061	0	1	0	0	50	2	2041776	0.0653062	1
GBP4	344056	834	-2	154242	40095	0	2	0	0	50	1	2021382	0.0653228	1
SOX2	39313	1104	-14	72963	21483	0	1	0	0	50	2	2663628	0.0653371	1
FBL	1289328	526	23	75834	23166	0	1	0	0	50	1	1968978	0.0653592	1
MSL3	53978	NaN	41	133848	33660	0	2	0	0	50	0	2041479	0.0653804	1
DHRS2	1299548	595	26	74019	18546	0	1	0	0	50	1	1919775	0.0654285	1
CCDC121	1192074	306	43	103026	28347	0	1	0	0	50	1	2671020	0.0654545	1
KPNA5	244987	581	14	132264	33660	0	1	0	0	50	0	2014914	0.0654582	1
CST4	189028	819	-21	33792	9372	0	1	0	0	50	3	1587366	0.0654855	1
LIN9	739974	278	21	136455	35112	0	1	0	0	50	0	2077779	0.065489	1
BACE1	436617	360	36	117513	34749	0	1	0	0	50	0	1787808	0.0655454	1
RUNDC2A	570118	441	51	90948	23694	0	1	0	0	50	1	2353692	0.0655689	1
OR2AG2	424776	548	8	70983	23166	0	1	0	0	50	1	1834437	0.0656589	1
OR52K1	190769	879	-1	71313	22638	0	1	0	0	50	1	1836978	0.0658683	1
MYLPF	2312884	165	47	43263	9999	0	1	0	0	50	1	1764510	0.0659302	1
EEPD1	357816	522	18	132099	39567	0	1	0	0	50	0	1996665	0.0659712	1
ARHGAP1	939971	176	44	106788	28644	0	2	0	0	50	0	1613964	0.0659763	1
CBX3	915230	445	43	46035	10593	0	1	0	0	50	3	2145363	0.0659882	1
MAGEB2	74310	NaN	16	73722	21714	0	1	0	0	50	1	1895223	0.0659983	1
YJEFN3	868278	284	7	69102	22770	0	1	0	0	50	1	1775730	0.0660244	1
SYPL2	1056159	272	37	64911	18150	0	1	0	0	50	1	1666401	0.0660876	1
CACNB4	279730	592	21	130482	35541	0	1	0	0	50	0	1967757	0.0661201	1
SURF2	1827885	416	28	61974	16731	0	1	0	0	50	1	1589313	0.0661564	1
SLC25A18	431029	390	-37	74613	22407	0	1	0	0	50	1	1912878	0.0661752	1
PVRL4	689033	250	23	117348	37587	0	1	0	0	50	0	1767777	0.0661908	1
STX6	217489	398	22	62931	15873	0	1	0	0	50	0	1827969	0.0665028	1
AVPR2	2328608	NaN	27	84084	29172	0	1	0	0	50	0	2441901	0.0665163	1
HAGHL	1207790	194	33	81906	23826	0	1	0	0	50	1	2086491	0.0665902	1
SMARCD1	1003045	211	56	123057	34947	0	1	0	0	50	0	1840509	0.0666659	1
CLIC4	518507	198	30	61578	15840	0	1	0	0	50	2	2201595	0.0666699	1
ATL3	1058363	170	50	131340	34386	0	2	0	0	50	0	1963995	0.0666798	1
OR2T33	18846	936	-35	72963	22275	0	1	0	0	50	1	1854864	0.0667242	1
PRMT8	227736	768	15	96723	24156	0	1	0	0	50	1	1764741	0.0667431	1
KDSR	201946	278	77	79695	22770	0	1	0	0	50	1	2022801	0.0668276	1
ICA1	176442	544	19	120186	29106	0	1	0	0	50	0	1793088	0.0668315	1
OR8D2	154391	921	-14	70719	21846	0	1	0	0	50	1	1794837	0.0668326	1
SHC4	398758	314	9	149853	41910	0	1	0	0	50	0	2235420	0.0668398	1
NUTF2	959655	143	49	32505	7095	0	1	0	0	43	2	1688346	0.0668752	1
DTNBP1	118453	750	24	94116	24189	0	1	0	0	50	3	4322406	0.0669235	1
FBP2	261413	427	41	79695	23859	0	1	0	0	50	1	2018643	0.0669625	1
CENPQ	64168	1198	-6	67188	15873	0	1	1	0	50	1	1700721	0.067006	1
C2orf28	1238919	230	39	66858	20163	0	1	0	0	50	1	1692306	0.0670082	1
CTSA	725555	209	59	120846	33495	0	1	0	0	50	0	1795332	0.0671124	1
CDK9	1194942	179	58	89034	24123	0	1	0	0	50	1	2249610	0.0671254	1
CHEK2	515703	219	-8	142131	38148	0	1	0	0	50	0	2107281	0.0672478	1
PODNL1	930314	231	32	115632	41481	0	1	0	0	50	0	1713459	0.0672844	1
ARHGAP12	359237	346	25	207075	51612	0	2	0	0	50	1	2158266	0.0672891	1
PIP5K1A	1409327	184	32	135564	37587	0	1	0	0	50	0	2007588	0.0673256	1
AKR1B15	403585	319	21	84975	21450	0	1	0	0	50	1	2139852	0.067346	1
SFXN3	744964	188	46	78012	22770	0	1	0	0	50	1	1962708	0.0674066	1
GRHPR	534559	337	36	77649	23430	0	1	0	0	50	1	1953105	0.0674226	1
GOSR1	488195	329	28	62535	15774	0	1	0	0	50	1	1567962	0.0674255	1
ZNF330	71072	671	-4	81114	17787	0	1	0	0	50	1	2036760	0.0675359	1
OTUD6B	104917	935	1	78837	19965	0	1	0	0	50	1	1979505	0.0675386	1
KCTD12	202176	734	11	72171	24651	0	1	0	0	50	1	1811931	0.0675458	1
GPC2	1299015	205	52	131010	44814	0	1	0	0	50	0	1931985	0.0676084	1
MASP2	639826	307	33	163779	46002	0	1	0	0	50	0	2414181	0.0676375	1
CCDC9	1350139	232	33	125565	36795	0	1	0	0	50	0	1849353	0.0676935	1
AHCYL1	660515	373	29	129954	34089	0	1	0	0	50	0	1912119	0.0677593	1
ZNF77	1119793	197	35	130251	33099	0	1	0	0	50	0	1914924	0.0678142	1
SFRS18	259457	638	13	195756	47586	0	1	0	0	50	0	2877798	0.0678179	1
MRGPRE	583782	421	36	68673	24585	0	1	0	0	50	0	1954029	0.0678402	1
EFNB3	2066943	232	27	76428	26433	0	1	0	0	50	0	2174007	0.0678608	1
MUC1	1801444	194	32	74019	13002	0	1	0	0	50	1	1848000	0.0679151	1
EIF3I	1460758	218	29	80817	20163	0	1	0	0	50	1	2010096	0.0679573	1
TRPM5	833749	589	47	272778	82830	0	3	1	0	50	3	2167902	0.0683195	1
SLC22A15	589216	538	9	129294	37818	0	1	0	0	50	0	1885752	0.0683543	1
C7orf43	1299015	205	52	132495	44022	0	1	0	0	50	0	1931985	0.0683704	1
DPT	358217	440	9	49896	11484	0	1	0	0	50	1	1958880	0.0684034	1
RIF1	228411	589	19	591624	156717	0	3	0	0	50	0	1561626	0.068446	1
PKD2L2	946917	396	47	153417	36762	0	1	0	0	50	0	2233110	0.0684904	1
SEPP1	343552	626	-12	98076	26268	0	1	0	0	50	0	1427217	0.0685079	1
PRKCI	361822	270	18	148302	35739	0	1	0	0	50	0	2154042	0.0686358	1
DCDC2B	1460758	218	29	81642	25476	0	1	0	0	50	1	2010096	0.0686743	1
SLC6A9	875223	214	39	168663	50028	0	2	0	0	50	1	1844502	0.0687136	1
AZGP1	1584669	391	36	71280	18909	0	1	0	0	50	1	1753620	0.0687264	1
ZSWIM2	278175	629	-5	153417	38247	0	1	0	0	50	0	2219580	0.0689055	1
FHL3	445132	232	42	67881	17556	0	1	0	0	50	1	1661550	0.0690673	1
DHDPSL	564805	169	40	76626	23166	0	1	0	0	50	1	1875588	0.0690675	1
STIP1	1602391	278	57	134079	32637	0	1	0	0	50	0	1934031	0.0691098	1
CRNN	387153	671	6	115236	32868	0	2	0	0	50	0	1660164	0.0691957	1
SEC16A	1413299	233	44	546084	166122	0	2	0	0	50	0	2184303	0.0692003	1
ZNF292	222401	547	19	640992	171006	0	3	0	0	50	0	1682142	0.0692008	1
CHRNA7	199973	778	-9	119724	33429	0	1	0	0	50	0	1723788	0.0692365	1
CEACAM4	1249321	499	27	57057	18084	0	1	0	0	50	1	2211990	0.0692391	1
OR5B17	475497	835	-29	71907	21450	0	1	0	0	50	2	1512885	0.0693233	1
IL12A	422983	616	22	61017	16797	0	1	0	0	50	3	1471833	0.0694152	1
C1RL	2422791	224	38	114576	32538	0	1	0	0	50	0	1645083	0.0694285	1
HSDL2	458381	341	17	102927	25674	0	1	0	0	50	1	1805529	0.069463	1
OR8K3	10317	969	-43	71577	21186	0	1	0	0	50	1	1741608	0.0694701	1
STK32C	148625	280	4	116490	32505	0	2	0	0	50	0	1670163	0.0695273	1
SUDS3	635715	823	32	82335	19734	0	1	0	0	50	1	1998744	0.069627	1
RIOK1	789838	250	17	142659	32670	0	1	0	0	50	0	2041413	0.069661	1
SIRT6	2256881	244	42	82137	26565	0	1	0	0	50	1	1992111	0.0696895	1
LPCAT4	542657	234	22	122199	39072	0	1	0	0	50	0	1746789	0.0697345	1
OXCT2	975799	388	39	116754	37290	0	1	0	0	50	0	1668711	0.0697444	1
PRPSAP1	1622536	209	24	91707	26499	0	1	0	0	50	1	2222352	0.0697462	1
PDE1B	643658	392	33	135531	35739	0	1	0	0	50	0	1936077	0.06978	1
MITF	48041	436	-15	144639	37125	0	1	0	0	50	0	2065503	0.0698032	1
C2orf56	488101	253	42	105666	29370	0	1	0	0	50	0	1508826	0.0698091	1
HEXA	1126741	366	48	127809	34749	0	1	0	0	50	0	1824834	0.0698156	1
TJAP1	1278255	230	56	129624	39963	0	1	0	0	50	0	1849848	0.0698496	1
RGS9	391807	516	-16	168762	44088	0	1	0	0	50	0	2406096	0.0699155	1
RENBP	2355024	NaN	25	102927	28347	0	1	0	0	50	0	2835162	0.0699978	1
CALCRL	61297	453	1	114147	27819	0	1	0	0	50	0	1624590	0.0700371	1
WDR45L	1250099	217	26	84183	21846	0	1	0	0	50	1	2024352	0.0702726	1
HEXDC	2591323	179	28	136059	42735	0	1	0	0	50	0	1928850	0.0703112	1
PTHLH	315469	581	-4	41712	12540	0	1	0	0	50	2	1410156	0.070377	1
HSPA1L	2509866	183	32	147048	44022	0	2	0	0	50	0	2082399	0.0703867	1
NAP1L5	177679	486	8	43197	11154	0	1	0	0	50	3	1882287	0.0703924	1
RGSL1	NaN	NaN	NaN	264231	63756	0	1	0	0	50	0	3738768	0.0704444	1
ATG7	184628	425	30	170082	46134	0	1	0	0	50	0	2403819	0.0705251	1
MSN	325257	NaN	47	141306	35112	0	1	0	0	50	0	1995411	0.0705854	1
N4BP2L1	226626	435	53	66462	15015	0	1	0	0	50	2	2239446	0.0706021	1
RAB31	441061	148	43	48477	12111	0	1	0	0	50	2	1630002	0.0707463	1
BUB1	NaN	NaN	NaN	265716	66330	0	1	0	0	50	0	3741342	0.0707896	1
GABRP	216977	618	19	106425	28116	0	1	0	0	50	0	1498101	0.0708078	1
PNMA1	600464	191	47	81147	23991	0	1	0	0	50	1	1936209	0.0708085	1
GTF2B	284162	537	1	75438	21087	0	1	0	0	50	1	1798632	0.0708603	1
MAGEE2	117293	NaN	-10	121704	33924	0	2	0	0	50	2	2497407	0.071022	1
FGF18	300840	347	30	49434	13926	0	1	0	0	50	1	1862157	0.0711843	1
PVRIG	1465817	204	59	73227	25476	0	1	0	0	50	1	1736823	0.0712222	1
FLT3LG	2173457	290	44	55209	18051	0	1	0	0	50	2	1840080	0.0713505	1
ZNF462	259213	625	-7	590535	158796	0	2	0	0	50	0	2319009	0.0714377	1
SLC2A5	865627	264	31	129657	39831	0	1	0	0	50	0	1808697	0.0714473	1
HNRNPF	368953	270	7	97020	26928	0	1	0	0	50	1	2293566	0.071452	1
MSR1	53956	947	-48	113190	29172	0	1	0	0	50	0	1578786	0.0714557	1
HIBADH	427440	372	10	79695	23166	0	1	0	0	50	2	2652111	0.071456	1
LMBRD1	42273	983	-2	132198	34419	0	1	0	0	50	0	1843479	0.0714727	1
LGALS4	1843355	219	37	78408	21582	0	1	0	0	50	0	2112693	0.0714995	1
COIL	333715	254	-10	135300	38643	0	1	0	0	50	0	1881825	0.071658	1
RHOT1	675374	312	21	171171	42273	0	1	0	0	50	0	2377848	0.071744	1
NES	1851672	180	37	368412	114510	0	3	0	0	50	1	2176086	0.0717584	1
TTLL3	953772	264	43	181665	52668	0	1	0	0	50	0	2518857	0.0718784	1
SLC26A6	1386275	212	37	181566	55836	0	1	0	0	50	0	2517306	0.0718841	1
CPSF7	1394229	286	57	119856	37257	0	1	0	0	50	0	1661220	0.0719062	1
C3orf35	471302	442	16	49467	15180	0	1	0	0	50	2	1634787	0.0719365	1
TMX1	338961	610	38	68574	17655	0	1	0	0	50	1	1609509	0.0719534	1
KRT5	1280474	464	36	137445	41250	0	1	0	0	50	0	1902747	0.0719909	1
TYRP1	77286	530	-31	127281	35277	0	1	0	0	50	0	1760385	0.0720582	1
OIT3	635147	291	38	128964	36366	0	1	0	0	50	0	1783254	0.0720747	1
GPR152	1392213	215	53	103620	36663	0	1	0	0	50	0	1432662	0.0720818	1
PDGFA	598406	318	9	52239	14388	0	1	0	0	50	4	2717946	0.0720884	1
FPR3	435870	690	-35	81378	24156	0	1	0	0	50	1	1905123	0.0721344	1
ARSE	191640	NaN	18	139260	39930	0	1	0	0	50	0	1921161	0.0722412	1
UMPS	307759	254	36	111474	33363	0	1	0	0	50	0	1537074	0.0722769	1
TLE6	1119793	197	35	139128	37389	0	1	0	0	50	0	1914924	0.0724065	1
MTA2	2695768	217	42	159720	45705	0	3	0	0	50	0	2197866	0.0724224	1
MSL1	1573630	202	28	85206	22506	0	1	0	0	50	1	1983432	0.0725349	1
ACSM4	1157790	439	27	139458	37851	0	2	0	0	50	0	1913472	0.0726317	1
MTCH1	832054	220	41	88077	27060	0	1	0	0	50	1	2046198	0.0726753	1
PGAM5	724450	495	35	70917	22440	0	1	0	0	50	2	2318547	0.0726882	1
CCDC42	473874	604	17	77154	19371	0	1	0	0	50	1	1789524	0.0727902	1
GPR119	301748	NaN	37	75603	24585	0	1	0	0	50	1	1753554	0.0727905	1
NMUR2	261658	955	4	96987	27753	0	1	0	0	50	1	2246475	0.0728871	1
SUV39H1	824559	NaN	27	97680	27159	0	1	0	0	50	1	2261127	0.0729308	1
TSTA3	2183482	235	37	78672	20922	0	1	0	0	50	1	1820280	0.072964	1
EIF2S3	528219	NaN	41	113025	32010	0	1	0	0	50	1	2612313	0.0730405	1
CYP2C9	278564	721	-15	118074	31119	0	1	0	0	50	0	1610565	0.0730574	1
TSPAN32	990037	630	25	75966	22935	0	1	0	0	50	0	2000955	0.0730779	1
C6orf129	498007	434	43	24090	6402	0	1	0	0	10	0	327855	0.0732209	1
ICOSLG	1128093	219	76	72435	19932	0	1	0	0	50	0	1900602	0.0733498	1
ATF3	418310	224	22	48213	13167	0	1	0	0	50	1	1759593	0.0733866	1
WRAP53	2068255	213	31	129129	38379	0	1	0	0	50	0	1752960	0.0734051	1
METTL2B	893183	199	45	92466	23463	0	1	0	0	50	1	2125761	0.0734213	1
PIAS1	325771	194	31	155595	43395	0	1	0	0	50	0	2109855	0.0734877	1
SNX33	586224	231	34	134574	36795	0	1	0	0	50	0	1824735	0.0734907	1
NOX4	30048	1071	-25	142197	36498	0	2	0	0	25	1	1463187	0.0735367	1
RDH12	482264	186	44	73590	22935	0	1	0	0	50	1	1688973	0.0735413	1
SOX13	560073	314	31	149226	40854	0	1	0	0	50	0	2017488	0.0737046	1
COQ5	1552470	216	46	79200	20790	0	1	0	0	50	0	2064051	0.0738302	1
TMBIM1	730654	197	33	75075	21945	0	1	0	0	50	1	1715736	0.0738469	1
PRPF4	426351	312	26	126819	33858	0	1	0	0	50	0	1709961	0.073901	1
MLST8	2179404	224	39	79266	21021	0	1	0	0	50	1	1810116	0.0739024	1
CAPN13	131345	692	5	165528	42174	0	1	0	0	50	0	2228985	0.0739971	1
C7orf60	157620	814	-14	96492	25674	0	1	0	0	50	3	2183775	0.0740685	1
PGAM2	1151124	282	56	59631	16995	0	1	0	0	50	1	2154867	0.0740887	1
PDIK1L	783481	212	23	80520	21846	0	1	0	0	50	0	2089296	0.0741412	1
ZBTB16	162787	529	-6	158697	43857	0	1	0	0	50	0	2130777	0.0742114	1
SEMA7A	640438	204	54	158301	45342	0	1	0	0	50	0	2123979	0.0742632	1
DNM1L	307288	308	-5	176880	49533	0	1	0	0	50	0	2371413	0.0743208	1
PIPOX	1752742	236	34	92532	26367	0	1	0	0	50	1	2097051	0.0744045	1
CCR6	149346	696	40	87285	24882	0	1	0	0	50	1	1979142	0.0744151	1
TGM6	611435	477	30	166914	48015	0	1	0	0	50	0	2234595	0.0744264	1
ALG5	176745	650	16	78903	21384	0	1	0	0	50	1	1788501	0.0744386	1
TMEM161B	96521	1090	3	117249	32043	0	2	0	0	50	0	1568292	0.0744927	1
LILRB1	978578	625	-1	153582	45903	0	3	0	0	50	0	2054019	0.0745021	1
ATP5S	666223	337	28	56958	13530	0	1	0	0	50	2	1812756	0.074598	1
FMR1NB	96935	NaN	-13	62436	15774	0	1	0	0	50	2	1980660	0.0748323	1
CEACAM6	1341589	499	16	80190	24255	0	1	0	0	50	1	1807245	0.0748566	1
ZFP36L1	543449	259	46	76527	24552	0	1	0	0	50	1	1723986	0.0748867	1
TMPRSS4	579148	447	50	106788	28050	0	1	0	0	50	1	2402301	0.0749899	1
ZSWIM6	NaN	NaN	NaN	282942	83358	0	1	0	0	50	0	3758370	0.0750083	1
MRGPRX3	631291	436	20	72732	23595	0	1	0	0	50	2	2299539	0.0750748	1
BCAP29	512690	753	26	87219	19602	0	1	0	0	50	1	1952346	0.0753535	1
PDIA4	598458	279	31	154737	40689	0	1	0	0	50	0	2045637	0.0753633	1
ESPL1	1677275	191	49	487740	154077	0	2	0	0	50	0	1856580	0.0753743	1
VWA5B1	NaN	NaN	NaN	284559	84909	0	1	0	0	50	0	3759921	0.0754021	1
AIFM3	577297	192	58	147444	41844	0	1	0	0	50	0	1947066	0.0754464	1
STAR	705837	277	46	68376	18942	0	1	0	0	50	2	2149059	0.0755043	1
CPN2	344707	269	34	122661	39897	0	1	0	0	50	0	1617165	0.0755681	1
PRDM12	505506	211	24	85371	25707	0	1	0	0	50	1	1903308	0.0756493	1
CECR1	305072	574	-55	125598	33000	0	1	0	0	50	1	2796222	0.0757529	1
ZSCAN12	NaN	NaN	NaN	146553	36399	0	1	0	0	50	0	3711411	0.0758921	1
C21orf29	860604	461	30	156255	47289	0	1	0	0	50	0	2047980	0.0760108	1
RBCK1	802744	165	41	123618	34386	0	1	0	0	50	0	1618881	0.0760735	1
ADRBK1	1369264	177	44	168960	43890	0	1	0	0	50	0	2212584	0.0760761	1
UNG	595266	487	20	82500	23529	0	1	0	0	50	1	1825230	0.0762168	1
EIF2AK2	603425	281	27	136026	33858	0	1	0	0	50	0	1776687	0.0762726	1
NANS	484638	272	48	85536	23562	0	1	0	0	50	1	1889646	0.0763244	1
OVOL1	3834148	287	55	63195	17589	0	1	0	0	50	2	1963467	0.0763468	1
EMB	72996	1229	-3	80355	20229	0	1	0	0	50	1	1774608	0.076349	1
GZMA	222027	430	1	62568	17523	0	1	0	0	50	1	2190870	0.0763671	1
CLN6	376180	365	33	73458	21582	0	1	0	0	50	1	1621884	0.0763678	1
NMI	215149	617	17	76032	18216	0	1	0	0	50	1	1676433	0.0764684	1
MED1	1434634	214	17	371085	105105	0	3	0	0	19	0	923340	0.0764925	1
FCHSD1	771583	353	25	163746	49203	0	1	0	0	50	0	2131305	0.0765368	1
DCAF8L2	NaN	NaN	NaN	148038	40062	0	1	0	0	50	0	3715074	0.0765585	1
KRT75	1194800	389	29	129063	38247	0	1	0	0	50	0	1679304	0.0765626	1
KCMF1	926772	202	23	90387	25443	0	1	0	0	32	0	1172853	0.0767712	1
CNP	2081077	206	23	97119	29403	0	1	0	0	50	1	2131899	0.0767994	1
P4HA2	371617	246	35	134706	36366	0	1	0	0	50	0	1746129	0.0768496	1
RHOBTB1	99491	403	-13	166089	44484	0	1	0	0	50	0	2150841	0.0769243	1
GCK	1321842	282	62	119196	32472	0	1	0	0	50	0	1541925	0.0770061	1
OR2M2	19998	935	-32	79959	23199	0	1	0	0	50	1	1748472	0.0770876	1
TINAG	58216	617	4	117414	28215	0	1	0	0	50	1	2567136	0.0770981	1
TMPRSS15	274061	981	-64	249315	63327	0	2	0	0	50	1	1407186	0.077171	1
MPG	1005761	238	36	70554	22407	0	1	0	0	50	1	1541001	0.0771756	1
FLRT3	NaN	NaN	NaN	149490	43956	0	1	0	0	50	0	3718968	0.0772008	1
CD2BP2	2312884	165	47	80982	22968	0	1	0	0	50	1	1764510	0.0773568	1
GPR137B	483624	632	8	93753	27621	0	1	0	0	50	1	2041413	0.0774068	1
WDR73	341520	263	32	89364	26169	0	1	0	0	50	1	1940466	0.0776156	1
RXFP1	151976	534	-10	185691	46563	0	1	0	0	50	0	2382006	0.0776513	1
C8orf41	91648	507	12	117546	36399	0	2	0	0	50	3	2285910	0.0776781	1
ZBTB48	628180	259	38	163218	45573	0	1	0	0	50	0	2089824	0.0777947	1
SLC26A11	684326	219	17	139656	46959	0	1	0	0	50	0	1788138	0.0777948	1
SLC23A3	773232	177	36	144573	43626	0	1	0	0	50	0	1850607	0.077815	1
FAM189B	1574928	194	45	150645	52404	0	1	0	0	50	0	1927695	0.0778408	1
C3orf19	561517	424	39	114906	28248	0	1	0	0	50	1	2487474	0.0778467	1
TDP1	296799	607	12	148830	37983	0	1	0	0	50	0	1902978	0.0779016	1
CATSPER4	896535	217	30	113289	30657	0	1	0	0	50	1	2448006	0.0779849	1
TRMT1	1948449	221	41	155661	46893	0	1	0	0	50	0	1988052	0.0779895	1
FTMT	70878	920	-16	55374	16995	0	1	0	0	50	1	1895883	0.0780326	1
KRT6A	1194800	389	29	131571	39402	0	2	0	0	50	0	1679304	0.0780392	1
SLU7	197504	619	30	146817	33462	0	2	0	0	50	0	1872090	0.0781141	1
UBE2B	929843	170	46	38115	9306	0	1	0	0	50	5	2155791	0.0781177	1
PARVA	447343	318	-4	90816	24915	0	1	0	0	50	1	1958088	0.0781516	1
CD86	557964	715	39	80619	19767	0	1	0	0	50	1	1737648	0.0781771	1
KRT6C	1194800	389	29	131835	39336	0	1	0	0	50	0	1679304	0.0781944	1
LIMA1	1008076	144	57	182688	47289	0	2	0	0	50	1	1835229	0.0782353	1
BMP15	15214	NaN	27	90948	26565	0	1	0	0	50	1	1956306	0.0783311	1
SPC25	173915	724	7	56430	12771	0	1	0	0	50	3	2197668	0.0783896	1
RCN1	251970	683	-1	80256	20328	0	1	0	0	50	1	1724646	0.0784048	1
DCST2	1654795	214	40	180708	55308	0	1	0	0	50	0	2295414	0.0784123	1
PAX6	172494	631	-11	104907	29238	0	1	0	0	50	1	2253900	0.0784213	1
CCDC81	356405	283	12	159819	39666	0	1	0	0	50	0	2028873	0.0784583	1
SMPD3	794719	279	46	150711	46497	0	1	0	0	50	0	1913076	0.0784652	1
SMTNL2	1239739	318	24	106458	33726	0	1	0	0	50	1	1654323	0.0784815	1
MIER1	331801	635	-9	153186	35211	0	1	0	0	50	0	1941126	0.0786003	1
MLKL	586358	173	30	117843	29370	0	1	0	0	50	0	1486848	0.0789371	1
DHODH	438866	372	19	91278	29700	0	1	0	0	50	1	1947429	0.0789558	1
CCDC99	96768	495	19	148302	36036	0	1	0	0	50	0	1870638	0.0789588	1
GAN	316209	160	14	143319	38247	0	1	0	0	50	0	1802625	0.079183	1
ZNF426	706527	642	-58	133782	33033	0	1	0	0	50	1	2839782	0.0793467	1
UBE2E3	114904	888	11	50391	13365	0	1	0	0	50	3	1933899	0.0794961	1
DEAF1	1774224	236	57	132231	40227	0	1	0	0	50	0	1656270	0.0795099	1
LETM1	851373	239	44	174372	50556	0	2	0	0	50	0	2182686	0.0795619	1
FN3K	783773	243	18	73227	21021	0	1	0	0	50	0	1763091	0.0796622	1
CYP2B6	1041792	375	14	116358	33132	0	1	0	0	50	0	1451802	0.0798168	1
UNC5C	25813	910	-12	219747	62997	0	1	0	0	50	0	2740320	0.0798591	1
RPN1	1216952	303	49	142428	41910	0	1	0	0	50	0	1775796	0.0798737	1
CUL3	255624	463	20	187374	46959	0	2	0	0	50	0	2330922	0.0800527	1
FAIM	198181	515	26	56298	13794	0	1	0	0	50	1	1875324	0.0801148	1
44625	429135	317	31	66561	18282	0	1	0	0	50	0	1592745	0.0801337	1
RTDR1	223123	573	53	82203	24024	0	1	0	0	50	1	1725471	0.0802158	1
CRYL1	346767	584	28	77319	20691	0	1	0	0	50	2	2277132	0.0803793	1
NCK1	181954	195	20	90354	23100	0	1	0	0	50	1	1891065	0.0804423	1
CA3	100997	1460	-18	63228	16863	0	1	0	0	50	2	1860441	0.0804494	1
FAM160B2	584373	219	34	159786	47817	0	1	0	0	50	0	1977228	0.0804746	1
DNAJC1	197451	608	2	132990	36201	0	1	0	0	50	1	2004618	0.0806325	1
TOX3	62431	993	-53	142362	39402	0	1	0	0	50	0	1757316	0.0806703	1
SIM2	451019	447	47	165066	50853	0	1	0	0	50	1	2476221	0.0806736	1
MAP1D	537616	126	34	81774	21780	0	1	0	0	50	1	1706133	0.0806874	1
ZFP36L2	227876	208	47	109494	37917	0	2	0	0	50	2	1571526	0.0807118	1
RP9	376764	459	15	54747	13365	0	1	0	0	50	2	1601886	0.0808844	1
PHLDB3	392374	166	-19	150711	45606	0	1	0	0	50	0	1854666	0.0809162	1
MFSD11	827288	206	22	109560	29238	0	1	0	0	50	0	1345740	0.0810663	1
TAF6	1299015	205	52	157344	49764	0	2	0	0	50	0	1931985	0.0810954	1
PLOD2	118043	471	-12	186285	46662	0	1	0	0	50	0	2284854	0.081183	1
BAAT	112947	898	-22	96591	29040	0	1	0	0	50	1	2000196	0.0812784	1
CEACAM3	1360684	454	23	59598	18117	0	1	0	0	50	2	1733325	0.0813547	1
RDH14	39949	1075	-7	75702	24783	0	1	0	0	50	0	1782066	0.0814009	1
OR1S1	637499	828	-25	74613	22110	0	1	0	0	50	1	1542057	0.0814327	1
MAN1B1	1836975	202	38	165165	47685	0	1	0	0	50	0	2018412	0.0814782	1
RIMS3	678456	421	20	72072	22077	0	1	0	0	50	2	2092398	0.0814935	1
FERMT3	1602391	278	57	158400	45540	0	1	0	0	50	0	1934031	0.0815494	1
ASS1	502828	260	35	101838	26367	0	1	0	0	50	1	2100153	0.081605	1
CYP2R1	353856	596	-13	118305	32373	0	1	0	0	50	0	1442892	0.0816384	1
SNRK	153482	399	30	178365	50721	0	1	0	0	50	0	2174403	0.0816757	1
RDH5	1814311	384	26	71742	24585	0	1	0	0	50	1	1478136	0.0816779	1
OLR1	397577	398	18	68574	14784	0	1	0	0	50	2	1985148	0.0817181	1
FLYWCH1	1490697	189	48	164373	51843	0	1	0	0	50	0	2001450	0.0817719	1
NME1-NME2	817798	267	-4	64581	17985	0	1	0	0	50	2	1866942	0.081828	1
FGF5	61128	903	-3	62964	17721	0	1	0	0	50	2	1819851	0.0818428	1
FBXL19	1508459	247	46	156849	53526	0	1	0	0	50	0	1907961	0.0818521	1
SV2A	798975	560	17	174636	50391	0	1	0	0	50	0	2123319	0.0818902	1
ZNF474	69953	707	2	84150	24255	0	1	0	0	50	1	1728573	0.0819173	1
AMPD1	600650	472	11	190146	48147	0	2	0	0	50	1	1949409	0.0819449	1
CSNK1A1	607110	152	32	90717	21945	0	1	0	0	50	1	1861629	0.0819959	1
DUSP9	1716845	NaN	44	86361	29172	0	1	0	0	50	1	1770846	0.0820585	1
VGLL2	181822	589	-25	73293	22341	0	1	0	0	50	3	2718540	0.0821253	1
MAP2K4	45834	583	-52	97779	25179	0	1	0	0	50	3	1998480	0.0821652	1
CELF4	55294	588	-11	118536	30855	0	1	0	0	50	1	2425929	0.0822116	1
LRRC15	344707	269	34	133551	41877	0	1	0	0	50	0	1617165	0.0822224	1
GDPD2	270766	NaN	38	140184	41679	0	2	0	0	50	0	1697454	0.0822241	1
DPY19L3	308903	531	-54	173514	46563	0	1	0	0	50	1	2574495	0.0822253	1
CCDC157	696089	214	57	174273	53526	0	1	0	0	50	0	2109426	0.0822554	1
KIAA1310	889428	234	44	205029	64350	0	1	0	0	50	0	2480148	0.0823058	1
HOXB2	946208	524	29	79662	26763	0	1	0	0	50	1	1628187	0.0823173	1
ZNF782	313097	491	17	169092	40392	0	1	0	0	50	0	2044647	0.0823379	1
QRICH1	1848854	185	39	181929	52404	0	1	0	0	50	0	2199153	0.0823643	1
ZNRF4	932785	365	19	95403	32703	0	1	0	0	50	1	1948452	0.0823771	1
RAPGEF5	747975	629	4	182358	43857	0	1	0	0	50	0	2201199	0.0824811	1
DCAF15	930314	231	32	141999	41448	0	1	0	0	50	0	1713459	0.0825079	1
FOXD4L1	528113	595	15	90057	31416	0	1	0	0	50	1	1835823	0.0825276	1
CKMT2	182569	777	30	99297	29007	0	1	0	0	50	3	2021943	0.0825468	1
CCDC37	295496	600	35	149886	38214	0	1	0	0	50	0	1806321	0.0826127	1
GPER	774288	346	36	84282	27390	0	1	0	0	50	1	1716264	0.0826129	1
LRRC40	297942	492	-14	145299	39336	0	2	0	0	50	0	1750782	0.0826251	1
C10orf26	883280	188	44	86955	25410	0	1	0	0	50	1	1770252	0.082633	1
C4orf14	570731	443	33	160512	49863	0	2	0	0	50	0	1933701	0.0826416	1
NEDD9	228484	418	30	201300	57189	0	1	0	0	50	0	2424411	0.0826643	1
RAB37	929990	484	15	77616	21879	0	1	0	0	50	1	1577103	0.0827288	1
IL17RE	950574	170	54	155661	49071	0	1	0	0	50	0	1868262	0.0829485	1
MAPRE1	550127	293	48	65637	16632	0	1	0	0	50	2	1865094	0.0831908	1
ZNF599	932476	607	-52	140250	35871	0	1	0	0	50	1	2830773	0.0833262	1
LHX1	625114	462	21	95172	27489	0	1	0	0	50	1	1920699	0.0833357	1
ACSL3	261505	361	14	173580	46101	0	1	0	0	50	0	2073126	0.0833533	1
ZNF541	NaN	NaN	NaN	315876	95370	0	2	0	0	50	0	3770382	0.0834017	1
VDAC3	535273	459	37	69663	18150	0	1	0	0	50	2	1973994	0.0834129	1
SLC44A3	329970	274	-13	157575	42405	0	1	0	0	50	0	1880505	0.0834177	1
NTSR1	1286411	208	27	94941	30690	0	1	0	0	50	0	2178462	0.0834199	1
SUMF2	738325	642	4	98175	26169	0	1	0	0	50	0	2249016	0.0835494	1
GOLGA8A	542657	234	22	146751	38577	0	1	0	0	50	0	1746789	0.0836326	1
FBP1	260812	350	38	80388	23067	0	1	0	0	50	1	1616373	0.0836341	1
ZPBP	135352	917	-13	85173	22539	0	1	0	0	50	0	1947792	0.0836878	1
OR2K2	348469	501	19	71907	22143	0	1	0	0	50	1	2285085	0.0838108	1
BCO2	389593	362	2	139458	37158	0	1	0	0	50	0	1656270	0.0838183	1
ZDHHC17	181943	605	-12	156024	38313	0	1	0	0	50	0	1849122	0.0839936	1
BTBD9	295241	821	32	154473	41547	0	1	0	0	50	0	1830708	0.0839943	1
CPNE1	1423559	169	53	145992	41217	0	1	0	0	50	0	1728243	0.0840889	1
DPF2	4112809	242	50	95964	24618	0	1	0	0	50	1	1918125	0.0841181	1
TDRD10	1804226	337	43	91542	25278	0	1	0	0	50	1	1829289	0.0841381	1
FADS6	1027517	320	20	81147	25278	0	1	0	0	50	0	1842324	0.0842698	1
QPCTL	939821	180	44	86196	29931	0	1	0	0	50	1	1717782	0.0843599	1
LYPD3	368705	182	-29	79035	25608	0	1	0	0	50	5	2006796	0.0843898	1
AFAP1L2	303560	299	6	196416	53955	0	2	0	0	50	1	2149785	0.0844316	1
IRX2	18983	986	-29	106722	35046	0	1	0	0	50	1	2120052	0.0846219	1
PTOV1	1673246	205	37	98373	29832	0	1	0	0	50	1	1952610	0.0846887	1
NQO2	430294	268	42	56364	14916	0	1	0	0	50	1	1771308	0.0847086	1
FADS1	1239228	212	59	120252	33198	0	1	0	0	50	1	2381148	0.0848258	1
TEC	253162	404	42	157080	37356	0	1	0	0	50	0	1842192	0.084872	1
ARRB1	740999	252	46	102498	27885	0	1	0	0	50	1	2029929	0.084873	1
ACSS1	572146	563	-18	162162	47916	0	1	0	0	50	0	1901493	0.0848853	1
GABPB1	314083	161	5	97119	28017	0	1	0	0	50	1	1920567	0.0849945	1
GLS	537377	292	36	161139	44583	0	1	0	0	50	0	1886346	0.0850261	1
SPATS1	993997	443	40	73854	18612	0	1	0	0	50	1	2309076	0.085125	1
SPARCL1	526761	537	16	163251	38214	0	1	0	0	50	0	1906212	0.0852407	1
SCARB1	1090766	206	35	131703	36399	0	2	0	0	50	0	1536216	0.0853297	1
COL9A3	1044503	208	48	160446	55473	0	1	0	0	50	0	1871232	0.085341	1
MELK	394473	231	38	160017	40359	0	1	0	0	50	0	1864995	0.0853972	1
BTN3A3	384310	375	47	138072	39237	0	1	0	0	50	0	1608024	0.0854603	1
PIK3R3	1116382	318	20	114543	26631	0	1	0	0	50	1	2251194	0.0855049	1
LPIN3	383021	309	5	200772	59796	0	1	0	0	50	0	2336202	0.0855343	1
OR5V1	329776	872	7	73854	21879	0	1	0	0	50	2	2034318	0.0857088	1
GUF1	62787	1009	2	161139	44187	0	1	0	0	50	0	1868889	0.0858129	1
HDAC8	366313	NaN	39	98307	25839	0	1	0	0	50	1	1924725	0.0858224	1
FGL2	312362	639	30	104511	26763	0	1	0	0	50	1	2041776	0.0860019	1
GCLM	558028	275	9	66198	17853	0	1	0	0	50	3	2339205	0.0860049	1
CYP2W1	765060	346	34	110187	39006	0	2	0	0	50	3	1933734	0.0862113	1
ATXN1	109777	623	30	183645	59103	0	1	0	0	50	0	2119821	0.0862178	1
CPE	171042	494	-9	114048	30789	0	1	0	0	50	1	2222121	0.0862262	1
NDRG1	234084	322	0	96954	26301	0	1	0	0	50	2	2652210	0.0862784	1
TRIM50	902769	422	52	113058	34254	0	1	0	0	50	1	2201067	0.086293	1
FAM110B	190462	601	15	84711	25476	0	1	0	0	50	1	1647525	0.0863776	1
SFTPC	587455	196	50	46794	14388	0	2	0	0	50	2	1862025	0.0863923	1
APEH	1551582	271	48	176550	49467	0	3	0	0	50	0	2032239	0.086457	1
DNAJB13	533576	196	41	76758	20163	0	1	0	0	50	1	1490577	0.0865053	1
FAM76B	298879	467	2	85074	19470	0	1	0	0	50	2	2320230	0.0865276	1
E2F1	710350	161	55	99726	32736	0	1	0	0	50	1	1934625	0.0865909	1
FPR1	436280	690	-24	79233	25410	0	1	0	0	50	1	1535919	0.0866539	1
PDE1C	124074	828	6	155892	39435	0	1	0	0	50	0	1789326	0.086702	1
C1orf141	444524	673	-5	97746	23727	0	1	0	0	50	1	1893474	0.0867124	1
OR51D1	212267	935	-3	72732	24189	0	1	0	0	50	2	1978383	0.0867473	1
SELE	269222	597	12	148962	37653	0	1	0	0	50	0	1706463	0.0868686	1
NFIX	1914702	221	41	104313	30723	0	1	0	0	50	1	2015772	0.0869168	1
MINPP1	470910	190	25	118899	31185	0	1	0	0	50	1	2296437	0.0869611	1
ACAA1	302137	411	32	99825	30756	0	1	0	0	50	1	1927959	0.0869646	1
SRL	825667	154	32	112068	30888	0	1	0	0	50	1	2162424	0.0869778	1
TBX19	410552	299	20	105204	31119	0	1	0	0	50	1	2027487	0.0870817	1
TRIM52	1034999	415	35	71643	17259	0	1	0	0	50	1	1380357	0.0871667	1
GNA15	908206	241	21	89364	24387	0	1	0	0	50	1	1719696	0.0872695	1
CENPI	426524	NaN	26	186912	46035	0	1	0	0	50	0	2130315	0.0873091	1
FAM153B	592877	609	19	99891	23859	0	1	0	0	50	1	1917795	0.0874023	1
ING3	105792	514	7	103917	26268	0	1	0	0	50	1	1994487	0.0874925	1
RTN4R	530222	292	44	103587	37587	0	1	0	0	50	1	1987920	0.0875025	1
CCDC149	280003	621	34	127644	34518	0	1	0	0	50	0	1450614	0.0875592	1
GRAMD1C	442573	363	36	162921	40920	0	1	0	0	50	0	1851168	0.0875759	1
SPRYD3	1726226	177	38	106524	29205	0	1	0	0	50	1	2042271	0.0875862	1
SEMA3E	74057	955	-30	188595	48213	0	2	0	0	50	0	2141403	0.0876357	1
CCDC87	1343990	194	62	192621	60027	0	2	0	0	50	1	1854138	0.0876654	1
TGFB1I1	839076	558	11	109428	32538	0	1	0	0	50	1	2094246	0.0877359	1
TRPV2	829707	254	8	179289	53064	0	1	0	0	50	0	2033361	0.0877373	1
TFDP3	76255	NaN	28	94578	26202	0	1	0	0	50	2	2538360	0.087868	1
FERMT1	302334	351	-16	164901	42009	0	1	0	0	50	0	1865490	0.0879558	1
RPL3L	1756887	183	42	97152	27786	0	1	0	0	50	1	1853247	0.0880138	1
ZNF276	1162469	219	39	144672	42141	0	1	0	0	50	0	1633170	0.088141	1
MTIF3	306964	570	60	68508	18117	0	1	0	0	50	1	1302840	0.0882757	1
SLC2A8	700547	270	42	109725	36003	0	1	0	0	50	1	2086293	0.0882913	1
NUFIP1	685617	360	32	120747	30327	0	1	0	0	50	1	2294622	0.0883371	1
TRIM21	264090	862	-7	112992	30756	0	1	0	0	50	1	2147013	0.0883467	1
AGA	44980	837	-8	83589	22638	0	1	0	0	50	2	2230338	0.0883614	1
CDKL4	391680	375	16	77220	19404	0	1	0	0	50	2	2059068	0.0884161	1
GPR143	125267	NaN	2	94380	29073	0	1	0	0	50	1	1791636	0.0884292	1
CHIT1	507603	453	31	112200	30657	0	1	0	0	50	1	2125860	0.0885924	1
NOX5	370981	394	26	187341	52833	0	2	0	0	50	0	2103123	0.0886279	1
FGFR1	841062	381	47	226743	64911	0	1	0	0	50	0	2545257	0.0886351	1
ACTG1	3582152	268	26	87978	25674	0	1	0	0	50	1	1665510	0.0886655	1
GZMB	853527	610	-12	58938	16500	0	2	0	0	50	2	2279838	0.0887586	1
APEX1	464497	395	17	74646	21681	0	1	0	0	50	2	1982376	0.0887596	1
SEMA3F	905995	196	40	185658	54912	0	1	0	0	50	0	2078703	0.0888617	1
TMPRSS7	265735	336	21	173085	46101	0	1	0	0	50	0	1937826	0.0888659	1
F13A1	44522	696	22	175956	47289	0	1	0	0	50	0	1969935	0.0888678	1
SHMT2	2162032	238	58	118272	36069	0	1	0	0	50	1	2232813	0.0889034	1
BAP1	1078407	229	62	173085	50061	0	2	0	0	50	0	1936935	0.0889066	1
WIPF1	463489	400	39	112695	39765	0	1	0	0	50	1	2126124	0.0889599	1
CPSF3	658161	278	37	168663	41910	0	1	0	0	50	0	1885455	0.0889997	1
TAS2R1	349235	840	-18	68904	20196	0	1	0	0	50	2	1820412	0.0892017	1
MAGEA1	607570	NaN	18	70719	21747	0	1	0	0	50	2	1867536	0.0892394	1
POMT1	651666	272	34	179322	50358	0	1	0	0	50	0	1997358	0.0893199	1
CLEC18C	1353954	139	37	108042	29073	0	1	0	0	50	1	2029335	0.0893424	1
LSS	775666	624	68	177837	48774	0	1	0	0	50	0	1979835	0.0893637	1
SF3A1	696089	214	57	189552	52404	0	1	0	0	50	0	2109426	0.0893984	1
GSS	968413	236	40	112299	33528	0	1	0	0	50	1	2107083	0.089433	1
MRPL3	276806	843	15	84348	22869	0	1	0	0	50	1	1582482	0.0894416	1
STK40	636943	212	28	103884	29568	0	1	0	0	50	1	1942710	0.0897217	1
SLC5A1	451895	458	-26	158004	45045	0	1	0	0	50	0	1751574	0.0897408	1
COMP	1351321	189	26	183546	48906	0	1	0	0	50	0	2032239	0.0898491	1
NAPG	191442	594	17	77946	19371	0	1	0	0	50	1	1454640	0.0899015	1
RNF103	621664	442	36	162888	42042	0	1	0	0	50	0	1799556	0.0900445	1
ADK	622159	598	40	91014	22539	0	1	0	0	50	2	2380455	0.0900646	1
MAD2L1BP	1424296	166	44	74910	22407	0	1	0	0	50	1	2205951	0.0901342	1
DMGDH	215159	434	45	206019	57618	0	3	0	0	50	0	2272974	0.0901656	1
NR4A1	468067	234	41	135861	44418	0	1	0	0	50	0	1495824	0.0903515	1
LEF1	231204	771	22	104940	27423	0	1	0	0	50	1	1948254	0.0903544	1
LASS5	1040456	192	58	95436	25047	0	1	0	0	50	0	2010294	0.0905174	1
OR1J4	373314	646	3	70686	22473	0	1	0	0	50	1	2071707	0.0905427	1
LSG1	370452	255	34	159918	40953	0	1	0	0	50	0	1756491	0.0905648	1
ADAMTS4	728669	234	37	190212	61842	0	1	0	0	50	0	2088306	0.0906045	1
HPGDS	129148	311	14	49599	11781	0	1	0	0	50	3	1658283	0.0906478	1
MTSS1	481244	561	39	177606	52074	0	2	0	0	50	0	1947825	0.0907011	1
C12orf50	152672	507	-36	103752	23859	0	1	0	0	50	1	1917630	0.090745	1
CDRT4	405431	452	-68	36135	9801	0	1	0	0	18	0	395967	0.090775	1
CASQ2	287179	639	8	99792	22968	0	1	0	0	50	1	1842654	0.0908299	1
SMO	811174	420	54	181995	56397	0	2	0	0	50	0	1992804	0.0908425	1
ICAM1	1729517	200	31	120615	40062	0	1	0	0	50	1	2226576	0.0908525	1
C3orf75	884829	197	44	63789	17886	0	1	0	0	50	1	1858395	0.091061	1
ENTPD1	370896	631	30	131439	33297	0	1	0	0	50	1	2419824	0.0910912	1
FCHO1	1181745	246	21	212553	63459	0	1	0	0	50	0	2320791	0.0910993	1
DDX31	1546589	581	42	202686	58575	0	3	0	0	50	1	2688939	0.0912291	1
GPHN	262406	846	19	184701	52701	0	2	0	0	50	0	2012373	0.0912925	1
ZNF675	451758	1464	-69	137907	32274	0	1	0	0	50	1	2531991	0.0913319	1
IGF2BP2	928734	367	38	144441	39897	0	3	0	0	50	1	1913307	0.0913693	1
PCDHGB1	662513	568	2	212520	66264	0	1	0	0	50	0	2313168	0.0913822	1
LBP	563754	350	47	115731	33165	0	1	0	0	50	1	2120613	0.0915075	1
FHAD1	NaN	NaN	NaN	346269	85272	0	1	0	0	50	0	3760284	0.0915907	1
CNOT10	464002	493	28	182424	45969	0	1	0	0	50	0	1980693	0.0916053	1
GYS1	1927185	211	43	175560	49566	0	2	0	0	50	0	1906080	0.0916097	1
SLC14A2	374175	438	-8	217371	63690	0	1	0	0	50	0	2358477	0.0916695	1
ACRBP	2816983	210	61	129624	35706	0	1	0	0	50	1	2369235	0.0917298	1
GTPBP10	138505	1085	-5	94512	24486	0	1	0	0	50	1	1725999	0.0918051	1
KLF17	865527	167	38	90618	26400	0	1	0	0	50	0	1880472	0.0918152	1
ENOX2	138723	NaN	23	149952	36663	0	3	0	0	50	0	1623171	0.091882	1
ADAM15	1696720	214	44	205491	60027	0	2	0	0	50	0	2223639	0.091912	1
SLC38A11	80659	427	-3	91707	26202	0	1	0	0	50	0	1900008	0.0919559	1
B3GAT1	270422	686	5	76230	25245	0	1	0	0	50	2	1950531	0.091972	1
SSC5D	NaN	NaN	NaN	351351	121671	0	1	0	0	50	0	3796683	0.0920396	1
MRGPRF	557282	416	51	77880	25476	0	1	0	0	50	1	2241822	0.0921093	1
TMTC2	61571	1375	-11	198264	54681	0	1	0	0	50	0	2139522	0.0921634	1
HSPBAP1	424676	412	39	117612	30393	0	1	0	0	50	1	2139192	0.0921646	1
KLF12	32882	755	41	94347	28116	0	1	0	0	50	1	1715043	0.0922161	1
CD40	559725	526	55	71148	14784	0	1	0	0	50	1	1290168	0.0924346	1
GPC3	96913	NaN	25	145068	37488	0	1	0	0	50	0	1560438	0.0924571	1
SNX31	1141276	196	50	109527	26598	0	1	0	0	50	1	1985478	0.0924632	1
HEPACAM2	311972	785	12	114378	31152	0	1	0	0	50	1	2070750	0.0925783	1
OR6Y1	179404	940	1	74547	22077	0	1	0	0	50	1	2130018	0.0927619	1
TRIM35	353563	561	8	115302	33594	0	1	0	0	50	1	2082267	0.0928024	1
PCDHGA1	662513	568	2	215919	66825	0	1	0	0	50	0	2313168	0.0928286	1
CLEC18B	475713	278	44	110583	29601	0	1	0	0	50	1	1996104	0.0928443	1
NDUFS5	682309	208	26	26136	6435	0	1	0	0	10	1	471669	0.0928651	1
SLC25A31	220342	437	-6	74283	21549	0	1	0	0	50	2	1879845	0.0929463	1
PLAGL1	358761	422	8	106062	32142	0	1	0	0	50	1	1910172	0.0930477	1
DPP3	1941577	194	51	174537	51678	0	1	0	0	50	0	1865193	0.0930572	1
SEMA3G	1078407	229	62	181302	57189	0	1	0	0	50	0	1936935	0.0930834	1
SEH1L	436900	355	69	102168	27819	0	1	0	0	50	1	1838133	0.0931411	1
KLHDC1	627751	342	18	101871	23958	0	1	0	0	50	1	1832721	0.0931446	1
MBD5	119685	955	7	346401	101178	0	2	0	0	50	3	2190210	0.093317	1
SH3BP5L	411701	567	-4	90618	28380	0	1	0	0	50	1	1626570	0.0933494	1
TRNT1	59117	1039	-15	105402	26565	0	1	0	0	50	1	1890900	0.0933992	1
FKBP8	1394856	259	48	96261	29865	0	1	0	0	50	2	2422893	0.0934274	1
FOXB1	573015	427	14	73755	23661	0	1	0	0	50	2	1855161	0.0934878	1
TUT1	2695768	217	42	206712	68013	0	2	0	0	49	0	2196546	0.0935804	1
AMACR	270768	793	4	123123	24882	0	1	0	0	50	1	2202354	0.0936638	1
RRP1B	892193	157	72	181863	49500	0	1	0	0	50	0	1928586	0.0937681	1
UBXN1	2425755	248	51	74085	21648	0	1	0	0	50	2	1854633	0.0939125	1
PROX2	884998	232	41	136587	40722	0	1	0	0	50	1	2436390	0.093916	1
ALOXE3	1455014	202	31	198363	58245	0	1	0	0	50	0	2099889	0.0939302	1
OR4K13	383274	768	-37	69399	20988	0	1	0	0	50	2	1735866	0.0939877	1
CA11	1597109	242	31	77088	23793	0	1	0	0	50	2	1926375	0.0940721	1
NPAS4	1963418	182	55	184041	57222	0	1	0	0	50	0	1945218	0.0940764	1
OSBPL11	269912	188	31	179487	47421	0	2	0	0	50	0	1896576	0.0941012	1
ARHGAP4	2328608	NaN	27	231429	70620	0	1	0	0	50	0	2441901	0.0942359	1
ACTR8	128709	552	39	150216	40359	0	3	0	0	50	0	1581591	0.0944362	1
SLCO2A1	547213	487	21	151668	44748	0	1	0	0	50	0	1595979	0.094489	1
CAPN10	837485	485	35	167277	52107	0	1	0	0	50	0	1760088	0.0944965	1
STAT5B	2101162	190	31	190410	50754	0	1	0	0	50	0	2003430	0.0944996	1
FOXP4	461476	388	43	160842	47751	0	1	0	0	50	0	1692141	0.0945093	1
CHD9	228561	675	-9	686928	183678	0	2	0	0	43	0	2288418	0.0945273	1
EML3	2695768	217	42	208989	65736	0	1	0	0	49	0	2196546	0.0945997	1
SRRM4	116468	835	2	143550	42966	0	2	1	0	50	2	1889613	0.0946341	1
SRD5A1	253440	585	-1	61446	17358	0	1	1	0	29	2	940467	0.0946535	1
TUBA1C	2154742	171	49	104841	30294	0	1	0	0	50	1	1854237	0.0946928	1
ZNF574	886688	438	31	200046	66759	0	1	0	0	50	0	2097414	0.0948295	1
ZNF496	352232	742	-15	138303	39105	0	1	0	0	50	0	1447281	0.0950093	1
FCRL3	180228	829	21	173712	50127	0	1	0	0	50	0	1817772	0.0950116	1
MTERFD2	1394664	278	35	91146	23694	0	1	0	0	50	2	2253273	0.0950436	1
CYP3A7	1430454	438	42	122034	32505	0	1	0	0	50	1	2148597	0.0951064	1
PRDM4	119393	805	22	190047	52107	0	1	0	0	50	0	1984092	0.09523	1
TM9SF2	310978	472	69	161271	42273	0	1	0	0	50	0	1683462	0.0952416	1
LRSAM1	784133	209	45	177771	46761	0	1	0	0	50	0	1853676	0.0953446	1
EPB49	584373	219	34	99165	27654	0	1	0	0	50	0	1977228	0.0953716	1
DDX39	954144	204	43	103653	27423	0	1	0	0	50	0	2066163	0.0953956	1
FAM81B	316501	511	4	111738	26565	0	1	0	0	50	1	1961124	0.0953965	1
KLHL29	NaN	NaN	NaN	187308	58014	0	1	0	0	50	0	3733026	0.0954116	1
TBC1D14	474439	259	58	166452	45309	0	1	0	0	50	0	1733457	0.0954641	1
GSTK1	379894	399	14	67188	19437	0	1	0	0	50	3	2121834	0.0956785	1
TARS	349408	674	4	178431	43725	0	1	0	0	50	0	1851201	0.0958212	1
CYP2C8	318306	717	-10	117744	31449	0	1	0	0	50	1	2055966	0.0958701	1
ADAM17	691902	278	38	202653	49500	0	1	0	0	50	0	2098074	0.0960214	1
EIF2C3	966499	282	25	205557	57288	0	1	0	0	50	0	2127246	0.0960608	1
CCDC19	803074	403	7	134805	33693	0	1	0	0	50	0	1394514	0.0960979	1
SQRDL	201356	490	1	107085	30426	0	1	0	0	50	0	2117247	0.0961368	1
TFAP4	944378	161	33	79860	23199	0	1	0	0	50	2	1950564	0.0961439	1
REEP2	1196831	209	49	60357	17556	0	1	0	0	50	2	2145462	0.0962018	1
EFNA5	78424	628	21	55308	14289	0	1	0	0	50	2	1964523	0.0962702	1
STK38	942238	148	37	116226	27324	0	1	0	0	50	1	2019699	0.0963172	1
IL28RA	840519	235	31	122529	34782	0	1	0	0	50	1	2126454	0.0964387	1
SLC35A4	706371	319	29	69861	26664	0	1	0	0	50	3	2184270	0.0965882	1
AVEN	409752	499	0	84480	25509	0	1	0	0	50	2	2050818	0.0967061	1
CUL4A	787509	214	46	187275	46167	0	1	0	0	50	0	1924428	0.0967335	1
PCDHGC5	665835	568	9	224301	74679	0	1	0	0	50	0	2304720	0.0967414	1
LMLN	607598	410	30	167640	44715	0	1	0	0	50	0	1722270	0.0967553	1
ANKS6	298496	375	12	200739	63987	0	1	0	0	50	0	2060124	0.096857	1
ZNF662	301212	447	21	116325	30195	0	1	0	0	50	0	2280036	0.0969334	1
KIF9	816399	242	46	192423	50424	0	1	0	0	50	0	1973136	0.0969367	1
EPC1	511962	189	15	199452	54681	0	1	0	0	50	0	2044779	0.0969571	1
TOB1	1152451	161	15	81048	21912	0	1	0	0	50	0	1587894	0.0969734	1
BAT5	2517236	193	20	147543	42141	0	1	0	0	50	1	2545917	0.0969743	1
VSIG2	168652	622	14	75669	24519	0	1	0	0	50	2	1830675	0.0970206	1
TMOD1	523548	420	35	87219	23265	0	1	0	0	50	2	2110086	0.0970214	1
VANGL1	71378	604	7	122232	36069	0	1	0	0	50	1	2103486	0.0972262	1
C14orf166B	357783	370	41	119427	30954	0	1	0	0	50	1	2054976	0.0972375	1
HADHA	641003	274	38	182688	51744	0	1	0	0	50	0	1865853	0.0973194	1
HSD17B12	432669	791	0	75999	20922	0	1	0	0	50	2	1831698	0.0973717	1
TMEM139	379894	399	14	49302	15939	0	3	0	0	50	3	2121834	0.0973867	1
FZR1	2160126	269	39	117678	35079	0	1	0	0	50	1	2020689	0.097432	1
RHCG	747784	363	22	114411	32307	0	1	0	0	50	2	2748867	0.0976623	1
LUM	23173	523	-18	79299	22176	0	1	0	0	39	0	1541826	0.0976778	1
ACCN3	622098	373	41	136191	37356	0	1	0	0	50	1	2330460	0.0977594	1
TAAR5	125852	605	19	77220	23562	0	1	0	0	50	2	1851333	0.097862	1
PAX5	429504	542	34	92730	27258	0	1	0	0	50	1	1584957	0.0978671	1
MRPL1	159162	508	15	80190	19800	0	1	0	0	50	2	1921788	0.0978987	1
TAS2R13	363803	644	2	70653	19635	0	1	0	0	50	1	1906971	0.0979235	1
MAGT1	549266	NaN	20	89232	23826	0	1	0	0	50	2	2137410	0.0979452	1
DSTYK	715889	277	39	219087	62073	0	2	0	0	50	0	2222913	0.0979556	1
COG7	521590	611	28	184503	50820	0	1	0	0	50	0	1869945	0.0980628	1
AKAP7	165730	682	15	90750	21219	0	1	0	0	50	1	1547898	0.0980636	1
RGL4	610486	266	30	111408	33330	0	1	0	0	50	1	1900239	0.0980643	1
MFSD6	651647	371	30	183909	53691	0	1	0	0	50	0	1861827	0.0981716	1
GALNT11	286605	586	15	145926	39303	0	1	0	0	50	1	2485857	0.0981833	1
CTAGE5	314800	300	16	200508	50556	0	1	0	0	50	0	2029434	0.0981927	1
ZNF207	679038	286	30	117876	33495	0	2	0	0	50	4	1979439	0.0981994	1
OSBP2	752472	303	37	214665	62832	0	1	0	0	50	0	2170971	0.0982713	1
OSTalpha	1042183	210	51	79233	25212	0	1	0	0	50	0	1528692	0.0983959	1
RNF10	1583841	209	40	194766	52734	0	1	0	0	50	0	1966107	0.0984495	1
RHBDL3	671605	271	22	95007	28644	0	1	0	0	50	0	1831764	0.0984602	1
GC	17296	933	-6	115203	30624	0	1	0	0	50	1	1956768	0.0984605	1
TAF1A	228041	467	-2	112497	25410	0	1	0	0	50	1	1910106	0.0984953	1
SYT12	1643265	152	47	99066	29040	0	1	0	0	50	0	1906014	0.098657	1
UPRT	145779	NaN	-5	73854	20592	0	1	0	0	50	2	1754709	0.0987076	1
AAGAB	312039	320	45	77451	19965	0	1	0	0	50	1	2070057	0.0988387	1
AHSA1	504548	359	47	82467	21384	0	2	0	0	50	1	1955448	0.0988642	1
PLA2G4F	655295	394	36	200805	59367	0	1	0	0	50	0	2017092	0.0989312	1
TFAP2B	17044	1081	-14	106755	32538	0	1	0	0	50	2	2529153	0.0989766	1
EPS8L1	1125216	432	-26	174306	53394	0	1	0	0	50	0	1748868	0.0990452	1
TGFB1	1193025	249	33	90750	27753	0	1	0	0	50	1	1530804	0.0991192	1
DPYS	39710	972	15	122397	35607	0	1	0	0	50	1	2061708	0.0991724	1
CCT2	484023	382	5	129558	35772	0	1	0	0	50	1	2182455	0.099249	1
KIAA0368	366471	419	28	482823	136323	0	2	0	0	36	1	1636008	0.0993283	1
THAP2	259684	393	-11	54615	14190	0	2	0	0	50	2	1872354	0.0995656	1
BCKDK	1296884	351	35	97449	29370	0	2	0	0	50	6	2077977	0.0995667	1
EXD1	933164	175	39	123189	33330	0	1	0	0	50	1	2062665	0.0998292	1
PA2G4	2785610	165	39	97713	24354	0	1	0	0	50	0	1856481	0.0998401	1
IFRD1	166238	412	-4	109857	28743	0	1	0	0	50	1	1838628	0.0998709	1
NHSL1	NaN	NaN	NaN	381447	118800	0	2	0	0	50	0	3793812	0.099906	1
TPRX1	881316	336	39	88968	33990	0	1	0	0	50	2	2086128	0.0999527	1
KPNA4	444964	408	21	128535	32835	0	1	0	0	50	1	2149356	0.0999554	1
RPH3AL	231893	591	2	74844	22176	0	1	0	0	50	2	1754346	0.0999853	1
HOXB3	946208	524	29	97416	31284	0	1	0	0	50	1	1628187	0.100003	1
SLC17A3	313920	673	30	118932	34419	0	1	0	0	50	1	1986897	0.100046	1
ENPP7	633863	209	31	106656	31845	0	1	0	0	50	1	1781604	0.100058	1
PCYOX1	669606	164	36	119691	32769	0	1	0	0	50	1	1999206	0.100065	1
E2F2	1050775	159	32	101244	31218	0	1	0	0	50	1	1690557	0.100094	1
NT5C3L	1760409	175	35	73755	19008	0	1	0	0	50	1	1943337	0.100185	1
FAR2	104924	674	-4	125004	32604	0	1	1	0	50	1	2084973	0.100202	1
CATSPER3	725156	226	27	97020	24651	0	1	0	0	50	2	2268981	0.100202	1
EVI5L	836245	270	24	192225	54879	0	1	0	0	50	0	1905816	0.100218	1
DYX1C1	298473	405	1	112959	25245	0	1	0	0	50	1	1883706	0.100221	1
SIGLEC8	393294	583	17	114774	36300	0	1	0	0	50	0	2171466	0.100239	1
GK2	112173	875	0	127347	37389	0	1	0	0	50	1	2121570	0.100315	1
REG3G	21996	1408	-29	43131	11121	0	1	0	0	50	6	2155692	0.100399	1
DDB2	1274054	198	38	102531	28149	0	1	0	0	50	1	1705902	0.100442	1
ME1	173617	711	-13	137742	37587	0	1	0	0	50	1	2289177	0.10055	1
CD300LG	1025836	241	19	86493	26565	0	1	0	0	50	2	2015376	0.100552	1
DHX36	94558	921	-11	247071	62304	0	1	0	0	50	0	2441043	0.100564	1
NPSR1	106021	949	0	97878	26763	0	1	0	0	50	2	2277132	0.1007	1
C1orf101	716278	590	1	231495	59763	0	1	0	0	50	0	2280762	0.100842	1
CDCA8	445023	375	27	68574	18843	0	1	0	0	50	1	1790679	0.101042	1
RFT1	907827	192	39	126918	39006	0	1	0	0	50	1	2097744	0.101083	1
PLAUR	441738	209	6	87582	23892	0	2	0	0	50	1	2052798	0.101207	1
WDR4	439191	276	57	99099	28116	0	1	0	0	50	1	1634952	0.101261	1
TTC31	1019591	315	50	122694	36894	0	1	0	0	50	1	2024121	0.101266	1
MMEL1	323457	335	30	190278	50688	0	1	0	0	50	0	1866645	0.101271	1
MGLL	587659	313	51	73821	22209	0	1	0	0	50	2	1706958	0.101289	1
ARMCX2	300391	NaN	31	141372	46629	0	1	0	0	50	1	2325378	0.101555	1
SLC8A2	797690	276	38	210276	67122	0	2	0	0	50	1	2105136	0.101597	1
ALKBH7	943949	407	31	49995	17325	0	1	0	0	50	2	1676301	0.101686	1
HNRPLL	859042	294	24	131637	35673	0	1	0	0	50	1	2160840	0.101755	1
PTGES2	1898149	195	32	87615	27027	0	2	0	0	50	1	2038971	0.101894	1
SUPT5H	1410725	230	39	263769	71247	0	1	0	0	50	0	2568192	0.102026	1
PGA3	1023217	531	47	92103	26796	0	1	0	0	50	3	2715702	0.102082	1
IFT80	427333	617	9	190806	47784	0	1	0	0	50	0	1854666	0.102196	1
PARL	1434591	408	37	91806	24816	0	1	0	0	50	2	2096457	0.102498	1
LRG1	2111443	278	43	77418	26532	0	1	0	0	50	1	1990692	0.102528	1
KIAA0748	246749	748	11	125895	33000	0	1	0	0	50	1	2050290	0.102533	1
LPL	203407	316	8	114741	30294	0	1	0	0	50	1	1867041	0.102617	1
RNMTL1	662733	483	10	97416	29007	0	1	0	0	50	1	1584693	0.102644	1
CYP3A43	1535089	438	36	123882	30954	0	1	0	0	50	1	2014881	0.102662	1
B3GNT7	1124713	359	42	91278	28512	0	1	0	0	50	0	1683627	0.102679	1
CD38	174323	327	55	73491	18678	0	1	0	0	50	2	1673364	0.102781	1
KMO	171933	382	-17	120252	30129	0	1	0	0	50	1	1951092	0.102902	1
RNLS	193044	396	33	87813	23760	0	1	0	0	50	2	1996533	0.102924	1
CDKAL1	132584	883	10	140712	37092	0	1	0	0	50	2	1982277	0.102956	1
FMO1	427825	968	-4	126984	34485	0	1	0	0	50	1	2058012	0.103013	1
PI4K2A	514755	143	54	113124	32802	0	1	0	0	50	1	1832259	0.103074	1
RFC3	84617	580	33	89892	23364	0	1	0	0	50	2	2040423	0.103086	1
ANKRD33	570716	438	22	110814	31746	0	1	0	0	50	1	1794606	0.103087	1
CCDC24	875223	214	39	72303	22341	0	1	0	0	50	1	1844502	0.1033	1
LIPC	441540	310	27	119163	32901	0	1	0	0	50	1	1924560	0.103358	1
CCDC15	409881	760	21	231165	57519	0	1	0	0	50	0	2220075	0.103418	1
ZMIZ2	1289776	164	55	213180	67485	0	1	0	0	50	0	2044812	0.103544	1
ZNF215	403341	827	6	125235	30195	0	1	0	0	50	1	2017983	0.103587	1
CAMK2D	166680	632	21	132792	32241	0	1	0	0	50	1	2139588	0.103595	1
KCNA4	30326	940	-38	150975	43263	0	3	0	0	50	1	1762299	0.103775	1
GPR37L1	704755	156	27	108438	35310	0	1	0	0	50	1	1742664	0.103853	1
MC3R	254407	729	-58	74316	21912	0	1	0	0	50	3	2151039	0.103877	1
SLC44A2	2082774	226	33	174306	47454	0	1	0	0	50	0	1666500	0.103878	1
CR1L	386490	361	13	136983	36861	0	1	0	0	50	1	2199087	0.103959	1
CCNB2	748599	329	34	95997	25674	0	1	0	0	50	2	2158893	0.103997	1
C19orf28	2160126	269	39	125928	40986	0	1	0	0	50	1	2020689	0.104004	1
UBE2Q1	1896659	403	41	102762	27819	0	1	0	0	50	1	1646139	0.104175	1
FRA10AC1	471978	399	17	82665	16137	0	1	0	0	50	2	1855524	0.104185	1
AGPAT3	842264	294	67	89562	25575	0	1	0	0	50	2	2009865	0.104209	1
PXN	1615004	187	57	140613	39567	0	1	0	0	50	1	2248950	0.104332	1
LINGO4	1062482	255	29	130119	46695	0	1	0	0	50	1	2078538	0.104457	1
SPACA1	176962	684	32	70554	19437	0	1	0	0	50	3	2026530	0.10463	1
C1orf156	244851	614	10	87879	23100	0	1	0	0	50	2	1963599	0.104636	1
PPP3CC	701231	142	41	125103	32406	0	1	0	0	50	1	1994817	0.104637	1
TCTE1	1037256	312	54	115005	35871	0	1	0	0	50	1	1832523	0.104708	1
RBM28	906031	255	22	186219	46629	0	4	0	0	50	0	1765731	0.104729	1
TLE2	1106128	195	32	182490	53130	0	1	0	0	50	0	1730322	0.104732	1
REST	590352	569	37	258522	68970	0	1	0	0	50	0	2451207	0.104733	1
MYBL1	329076	140	37	183447	46134	0	2	0	0	50	1	1782066	0.104734	1
CRYGD	327858	440	13	41910	11055	0	1	0	0	50	4	1977426	0.104816	1
FBXW9	1967616	218	15	105996	34089	0	1	0	0	50	2	2362305	0.104893	1
SH3GL2	28189	392	-31	86361	21648	0	1	0	0	50	2	1923834	0.104938	1
BNIPL	1614665	165	40	84843	25047	0	1	0	0	50	2	1888227	0.105032	1
PALM	1914670	200	23	90717	27687	0	1	0	0	50	2	2017026	0.105127	1
TSPAN11	315469	555	-5	60720	17490	0	1	0	0	50	1	1519848	0.105173	1
FBXO22	550701	339	47	98043	27786	0	1	0	0	50	2	2177274	0.105248	1
DDX23	1655612	214	57	195954	54021	0	1	0	0	50	0	1848693	0.105252	1
NUP54	525212	403	38	121869	33363	0	1	0	0	50	1	1931292	0.105261	1
ABHD1	1214097	238	50	95073	29073	0	1	0	0	50	2	2108205	0.105396	1
DCLK3	374894	617	-14	152394	41547	0	1	0	0	50	0	1433784	0.105538	1
ZHX2	426706	533	13	192621	56661	0	1	0	0	50	0	1811733	0.105568	1
PRR19	792230	218	42	79860	27159	0	1	0	0	50	3	2272050	0.105573	1
MKL1	578345	228	55	213015	68541	0	3	0	0	50	0	2002011	0.105648	1
CAMK2A	978175	220	47	120747	31911	0	1	0	0	50	1	1905585	0.105681	1
AASDH	639545	594	5	260469	71478	0	1	0	0	50	0	2446983	0.105691	1
ZBTB9	1397665	236	31	105666	35508	0	1	0	0	50	0	1886676	0.105882	1
CDK18	679311	268	34	121671	34254	0	1	0	0	50	1	1916343	0.105884	1
GPR110	203250	291	-5	219186	61677	0	1	0	0	50	0	2054052	0.10595	1
GPC1	409918	407	20	129327	39864	0	1	0	0	50	1	2035077	0.105977	1
CSF1	785919	216	30	129690	38313	0	1	0	0	50	1	2038377	0.106097	1
RUNX1	164915	429	45	114807	35673	0	1	0	0	50	0	2044251	0.106158	1
RUNX2	54989	416	8	123189	36399	0	1	0	0	50	1	1933965	0.106215	1
MAP2K3	415581	517	-43	85173	22539	0	1	0	0	50	2	1868229	0.106489	1
SLC28A1	355337	291	25	159720	46893	0	1	0	0	50	1	2500641	0.106494	1
ZNF559	401242	705	-65	129723	31944	0	1	0	0	50	2	2841795	0.106617	1
TBL3	1747301	183	46	190608	58377	0	1	0	0	50	0	1773981	0.106672	1
MEF2B	1260413	215	35	97614	25245	0	1	0	0	50	1	1525359	0.10669	1
REG1B	10958	1389	-22	41580	9999	0	1	0	0	50	3	1624854	0.106716	1
EPOR	1385739	197	31	116424	37521	0	1	0	0	50	0	2060685	0.106759	1
TNS4	1185295	203	19	166518	50886	0	1	0	0	40	0	1546116	0.106921	1
MRGPRX4	631291	436	20	72369	23760	0	1	0	0	50	2	2299539	0.106989	1
CTBP2	283236	508	20	227403	74844	0	2	0	0	50	0	2107281	0.107129	1
EDC3	635020	206	51	119625	33924	0	1	0	0	50	1	1860144	0.107196	1
CD1D	120333	711	8	79035	22737	0	2	0	0	50	2	2502753	0.107336	1
FIGF	200632	NaN	40	86229	21582	0	1	0	0	50	2	1874268	0.107411	1
MDGA2	14033	1195	-46	227997	62568	0	1	0	0	50	0	2105598	0.10749	1
PLXDC1	1452583	212	26	121077	32868	0	1	0	0	50	1	1875456	0.107594	1
ESR2	528074	387	46	132825	36366	0	1	0	0	50	1	2055240	0.107705	1
ANO1	763592	286	35	240207	62832	0	2	0	0	50	0	2213145	0.107739	1
LDB2	55867	983	2	99198	25641	0	1	0	0	50	2	2148960	0.107751	1
WWP2	1410481	NaN	42	210639	57354	0	3	0	0	50	1	2366859	0.107827	1
KBTBD4	995645	214	31	124608	36069	0	1	0	0	50	1	1924329	0.107907	1
KIAA1191	549164	427	28	72699	20955	0	1	0	0	50	3	2019765	0.107955	1
LIX1	382123	614	38	67881	18150	0	1	0	0	50	2	2136354	0.107962	1
CELF1	1011926	219	40	126291	32208	0	1	0	0	50	0	2207766	0.108016	1
KRT16	1494501	323	11	110583	32967	0	1	0	0	20	0	1015575	0.108082	1
ZNF585B	248427	984	-56	183876	46002	0	1	0	0	50	0	1686531	0.108219	1
RECQL5	1912060	198	37	240702	69663	0	1	0	0	50	0	2205687	0.108318	1
PRUNE	1617972	165	35	105996	31614	0	1	0	0	50	0	1846383	0.108379	1
SCUBE2	623689	357	31	249051	65472	0	3	0	0	50	0	2279574	0.108441	1
TNIP2	628294	228	46	100518	29766	0	1	0	0	50	2	2161599	0.108504	1
SMAD7	160419	191	79	97317	30690	0	1	0	0	50	2	2092761	0.108505	1
SLC20A2	582397	459	34	150975	46530	0	1	0	0	50	0	2626107	0.108526	1
KRT14	1494501	323	11	111111	32340	0	2	0	0	20	0	1015575	0.108591	1
SLC6A13	316827	557	28	144144	40491	0	1	0	0	50	1	2209845	0.108665	1
SRP54	629868	171	32	126951	28974	0	1	0	0	50	1	1944261	0.108773	1
SLC37A3	354350	587	28	133617	33693	0	1	0	0	50	1	2046099	0.108786	1
WSB2	639801	584	-3	96657	26994	0	1	0	0	50	1	2333133	0.10884	1
RFX5	1322568	174	42	141603	45210	0	1	0	0	50	1	2166846	0.10886	1
SLC16A2	357915	NaN	14	141207	43131	0	1	0	0	50	1	2160708	0.108864	1
NT5DC1	260580	640	19	112002	27984	0	1	0	0	50	1	1711545	0.109003	1
SLCO3A1	70107	867	-8	171468	51678	0	1	0	0	50	1	2620233	0.109004	1
LARP6	250598	339	10	120252	35178	0	1	0	0	50	1	1834107	0.109203	1
RASIP1	1635420	190	44	215193	75471	0	1	0	0	50	0	1953336	0.109335	1
TOX4	707390	470	30	144111	43890	0	1	0	0	50	1	2195259	0.109335	1
MSLNL	1187310	273	39	237963	81015	0	1	0	0	50	0	2159949	0.109338	1
RNF31	974559	220	41	251328	75471	0	1	0	0	50	0	2277165	0.109532	1
PAQR9	397648	422	17	84645	27621	0	1	0	0	50	2	1801965	0.109546	1
SUOX	2080397	229	31	123750	39600	0	1	0	0	50	1	1881000	0.109563	1
ULK4	310078	648	15	309045	84183	0	1	0	0	50	0	2799225	0.109566	1
P2RY10	14218	NaN	50	79596	21780	0	1	0	0	50	2	1693593	0.1096	1
TSNAX	291493	439	14	71082	17325	0	1	0	0	50	3	1942941	0.109617	1
CDK15	391799	588	32	94149	25344	0	1	0	0	50	2	2002110	0.109659	1
IL1F7	590466	420	46	59334	14520	0	1	0	0	50	3	2250633	0.109758	1
ACTB	1906749	195	34	88176	25476	0	1	0	0	50	1	2109162	0.109777	1
HINFP	1324478	195	58	125664	31746	0	1	0	0	50	1	1902516	0.109982	1
CDK5RAP1	464431	395	39	140811	38973	0	1	0	0	50	1	2131470	0.11	1
ANGPT4	824412	579	36	119691	33264	0	1	0	0	50	1	1810842	0.110054	1
MEN1	2261775	230	61	141900	44616	0	1	0	0	50	1	2145528	0.11012	1
NOBOX	185754	838	-7	132495	41052	0	1	0	0	50	1	2002308	0.110173	1
RGPD4	NaN	NaN	NaN	420387	110946	0	1	0	0	50	0	3785958	0.110187	1
KIR2DL3	1155455	625	-10	81840	22704	0	1	0	0	50	3	2224629	0.110187	1
ITGB7	1703142	191	52	187341	55506	0	1	0	0	50	0	1685904	0.110269	1
TPCN1	429315	206	36	215886	59235	0	1	0	0	50	0	1942611	0.110278	1
KCNN1	1328847	217	35	125532	39600	0	1	0	0	50	1	1894431	0.110321	1
RASGRP2	2042840	230	60	145959	41547	0	1	0	0	50	1	2199681	0.110466	1
C3orf52	268780	440	28	79629	22143	0	1	0	0	50	1	1887831	0.110702	1
PI4KA	436102	288	42	495165	133584	0	4	0	0	50	1	1958418	0.110715	1
KCNH5	68312	704	-32	237006	64053	0	1	0	0	50	0	2123286	0.110758	1
SLC13A1	99560	955	-15	142131	40623	0	1	0	0	50	1	2135958	0.110766	1
ZNF766	495542	909	-36	113157	27522	0	1	0	0	50	1	1700358	0.110776	1
IPO4	974559	220	41	254529	78309	0	1	0	0	50	0	2277165	0.110907	1
VLDLR	192846	541	-1	214203	52503	0	1	0	0	50	0	1914330	0.111024	1
TRAM1L1	24934	NaN	-31	85833	24057	0	1	0	0	50	2	1797246	0.111275	1
KBTBD3	86519	753	-16	145794	37059	0	1	0	0	50	1	2177208	0.111438	1
MLLT3	85091	575	14	140019	32934	0	1	0	0	50	1	2086920	0.111646	1
GFM1	197292	890	-9	180609	49665	0	1	0	0	50	1	2691744	0.111652	1
AP1B1	849693	251	36	225786	65076	0	1	0	0	50	0	2003430	0.111811	1
GPATCH1	420460	212	-7	223938	60390	0	1	0	0	50	0	1986534	0.111839	1
HDC	308338	282	4	156750	44517	0	1	0	0	50	1	2325081	0.112161	1
AR	106188	NaN	-7	214896	63591	0	1	0	0	50	0	1899612	0.112228	1
KIF11	347309	312	20	255354	66891	0	1	0	0	50	0	2257200	0.112231	1
LGR6	674939	297	37	233211	75372	0	1	0	0	50	0	2060058	0.112306	1
PKP2	292831	381	-18	207042	60060	0	1	0	0	50	0	1828068	0.112356	1
ATP2C1	313762	475	19	240669	62667	0	1	0	0	50	0	2123385	0.112439	1
EIF4A1	1957426	194	24	98604	26334	0	1	0	0	50	2	2037057	0.112699	1
DPEP1	1092575	211	38	97119	28809	0	1	0	0	50	1	1433157	0.112718	1
TAF4	801904	411	-25	242814	85272	0	1	0	0	50	0	2135892	0.112772	1
CPNE5	844979	244	43	145563	38973	0	1	0	0	50	1	2143977	0.112922	1
RIBC2	460724	199	8	92136	22605	0	1	0	0	50	2	1896873	0.113067	1
MORC4	177448	NaN	31	227205	57717	0	1	0	0	50	0	1992639	0.113104	1
OR2A14	221024	812	-11	70455	21813	0	1	0	0	50	3	1860210	0.113232	1
CNOT2	156657	609	-17	132858	33759	0	1	0	0	50	0	2208690	0.113252	1
CCDC110	173409	422	20	203280	46992	0	1	0	0	50	0	1779822	0.11329	1
FAM113A	766497	396	44	106029	31878	0	1	0	0	50	2	2178198	0.113297	1
ZNF280C	320988	NaN	38	181830	44484	0	1	0	0	50	0	1591854	0.113301	1
ITGBL1	26094	536	-6	122760	28215	0	1	0	0	50	0	2039499	0.113322	1
NR5A1	492584	353	24	107184	32406	0	1	0	0	50	1	1572747	0.113331	1
TUBA8	519135	179	19	105171	30261	0	1	0	0	50	0	1746756	0.113354	1
CSDE1	600480	472	3	203841	54648	0	1	0	0	50	0	1782066	0.113457	1
C12orf43	1225663	380	40	62865	17424	0	1	0	0	50	3	1655445	0.113512	1
TOMM70A	377740	361	20	146916	38313	0	1	0	0	50	1	2152062	0.113517	1
KIAA1522	1339617	195	26	239877	87912	0	1	0	0	50	0	2094939	0.113573	1
KIF5B	360559	166	29	238755	57453	0	1	0	0	50	0	2084115	0.113628	1
C9orf82	104669	632	-28	86724	22770	0	1	0	0	50	3	2280894	0.113643	1
TBC1D23	378718	265	25	168003	42174	0	1	0	0	50	1	2454969	0.113783	1
DNM2	2114424	208	31	218394	62370	0	1	0	0	50	0	1903143	0.113819	1
ST3GAL5	1164530	216	51	101739	26763	0	1	0	0	50	2	2077350	0.113952	1
NOL4	10823	966	-14	153351	40392	0	1	0	0	50	1	2237367	0.113953	1
YARS	1339617	195	26	126918	34947	0	1	0	0	50	0	2094939	0.114015	1
CTPS2	295447	NaN	30	144375	37092	0	1	0	0	50	1	2102991	0.114023	1
APP	529745	793	-13	187242	48477	0	1	0	0	50	0	1626636	0.114166	1
WHSC2	747944	321	38	125301	39039	0	1	0	0	50	1	1824009	0.114199	1
TMEM99	836683	269	-10	58608	18315	0	1	0	0	50	3	1532949	0.114231	1
CTNNA1	1432876	380	39	217107	59004	0	1	0	0	50	0	1884300	0.114272	1
MARK1	544426	520	-9	191334	51810	0	1	0	0	50	0	1659999	0.114313	1
NDRG4	678092	320	0	95733	26631	0	1	0	0	50	2	1946340	0.114415	1
EPN3	1532661	200	20	144276	46893	0	1	0	0	50	1	2094411	0.114503	1
MAPK9	1623084	362	25	114015	28446	0	1	0	0	50	1	1654455	0.114547	1
SUV420H1	1059031	161	51	212355	55341	0	1	0	0	50	0	1838001	0.114581	1
CCDC6	137718	555	0	113553	30690	0	1	0	0	50	0	1864434	0.114584	1
SEPHS2	2338593	142	59	100551	32802	0	1	0	0	50	2	2040324	0.114625	1
LMAN2	942017	227	53	84975	23826	0	2	0	0	50	1	1838199	0.114652	1
BPIL2	371339	401	3	122496	33924	0	1	0	0	50	1	1770351	0.114991	1
CA2	100997	1460	-18	63228	16665	0	1	0	0	50	2	1860441	0.115029	1
OR10G8	158396	830	-10	69861	22803	0	1	0	0	50	4	2210670	0.115208	1
PCDHB7	915569	724	-11	176847	58971	0	1	0	0	50	2	2228193	0.115282	1
MUC7	264556	861	26	82599	30459	0	1	0	0	50	3	2139225	0.11529	1
STK39	135182	980	-1	133617	35277	0	1	0	0	50	1	1925781	0.115294	1
STAT6	2122802	172	52	201960	58212	0	2	0	0	50	1	1779624	0.115481	1
NLRP11	991833	362	-35	244530	66132	0	2	0	0	50	0	2098866	0.115528	1
RBM45	234602	603	21	114807	30030	0	1	0	0	50	0	1867866	0.115572	1
HSPA2	662511	188	36	145992	44088	0	1	0	0	50	1	2097414	0.115648	1
AP1M2	2036812	226	23	103026	27456	0	1	0	0	50	2	2069826	0.115707	1
MTF1	445066	303	33	176253	51645	0	1	0	0	50	0	1510344	0.115714	1
PYGO1	306625	405	-9	97911	27621	0	1	0	0	50	2	1965480	0.115795	1
CYP2J2	60418	824	-6	120318	32439	0	1	0	0	50	1	1723887	0.115948	1
HSPA6	741254	448	41	145794	45474	0	1	0	0	50	1	2088603	0.115964	1
PTCD2	421218	342	27	94644	24651	0	1	0	0	50	2	1896807	0.115973	1
CCT3	2232742	187	30	131373	35937	0	1	0	0	50	0	2126850	0.116109	1
NBR1	1341175	172	25	232089	63030	0	1	0	0	50	0	1981089	0.116159	1
TBX20	154022	926	5	105039	30690	0	1	0	0	50	0	1699236	0.116192	1
ZDHHC8	503106	277	64	187704	64845	0	1	0	0	50	0	1601523	0.116209	1
CYP4B1	658240	475	8	123453	33462	0	1	0	0	50	1	1760913	0.116445	1
GPLD1	399209	465	7	206250	57090	0	1	0	0	50	0	1755072	0.116514	1
C1orf92	1172126	244	39	132858	39006	0	1	0	0	50	1	1893078	0.116562	1
RALGAPA1	258743	457	12	503019	132759	0	3	2	0	50	2	1756458	0.116579	1
GP2	243266	848	-5	129162	34980	0	1	0	0	50	1	1839717	0.116605	1
DUSP16	748543	157	30	155166	44616	0	1	0	0	50	1	2209251	0.116648	1
GYS2	510830	830	-17	170082	44946	0	1	0	0	50	0	1443750	0.116796	1
MUS81	3779084	287	42	128733	41151	0	1	0	0	50	1	1830015	0.116823	1
IKZF3	1607516	292	26	124641	29799	0	1	0	0	50	1	1771341	0.116855	1
SETD3	340080	429	-11	146784	39039	0	1	0	0	50	1	2085765	0.116869	1
NR5A2	120174	616	-8	129327	34419	0	1	0	0	50	1	1837308	0.116893	1
KRT3	1444461	422	38	146157	44022	0	1	0	0	50	1	2074017	0.117022	1
FOLH1	11046	1009	-19	182160	48015	0	1	0	0	36	0	1542783	0.117056	1
SLC22A12	1970283	411	54	126423	42075	0	1	0	0	50	1	1792626	0.117107	1
PGBD2	113516	547	-2	139293	37620	0	1	0	0	50	0	2232021	0.117234	1
HOXA3	356045	385	28	99660	32604	0	2	0	0	50	1	2105268	0.11724	1
MICALL1	1370748	203	50	201531	61215	0	1	0	0	50	0	1703922	0.117253	1
ADH1A	250334	786	3	89826	25212	0	2	0	0	50	1	1896444	0.117304	1
MANBA	379516	303	32	213147	54747	0	2	0	0	50	0	1800117	0.117382	1
KIAA0319L	956500	451	27	250767	69003	0	1	0	0	50	0	2116983	0.117429	1
GCKR	1193266	306	39	150447	42801	0	1	0	0	50	1	2127048	0.117435	1
KRT25	836683	269	-10	106590	30327	0	1	0	0	50	3	1532949	0.117483	1
FGD3	478130	463	43	172359	49599	0	1	0	0	50	1	2432298	0.117645	1
GALNTL6	5263	1023	-13	145761	37389	0	1	0	0	50	1	2056692	0.117659	1
FMNL3	1919377	265	60	246345	68871	0	1	0	0	50	0	2072730	0.117815	1
SNW1	442490	359	42	136653	35013	0	1	0	0	50	1	1924659	0.117865	1
ALDH1A3	378556	374	0	122265	34848	0	1	0	0	50	1	1719432	0.118034	1
ARHGEF15	772200	257	20	190971	65043	0	1	0	0	50	0	1603701	0.11804	1
UGGT2	175188	834	34	373527	92070	0	2	0	0	50	2	2103519	0.118162	1
CIZ1	1762678	201	44	212982	60357	0	3	0	0	50	0	1785300	0.118251	1
PCSK1	525524	288	24	184272	49071	0	1	0	0	50	0	1543542	0.118334	1
PSD2	714699	223	64	181533	53295	0	1	0	0	50	0	1520046	0.118376	1
DNAJC10	332624	421	7	196581	47553	0	1	0	0	50	0	1645314	0.118428	1
GNPDA1	696239	321	48	70785	17721	0	1	0	0	50	3	1781076	0.118439	1
CCNK	345332	429	2	136224	40293	0	1	0	0	50	1	1908819	0.118444	1
RUSC1	1668953	177	44	214797	70521	0	2	0	0	50	0	1796982	0.118479	1
SCNN1B	520509	611	32	153912	41217	0	1	0	0	50	1	2151435	0.118719	1
ZNF623	2198262	229	33	127149	32538	0	1	0	0	50	0	2003265	0.119108	1
UNC13A	1029781	246	37	415371	106953	0	3	0	0	50	1	1570008	0.119153	1
FBXO27	1653595	282	32	65373	20955	0	1	0	0	50	2	1851894	0.119205	1
EIF4B	1726226	177	38	146751	40557	0	1	0	0	50	1	2042271	0.119223	1
CA7	868790	142	24	63690	17391	0	2	0	0	50	2	1803087	0.119275	1
LARP1	549658	179	27	243441	66825	0	1	0	0	50	0	2021052	0.119376	1
TRAF3IP2	320530	201	32	133155	38115	0	1	0	0	50	1	1850409	0.119386	1
DOK5	139298	847	-37	74679	19272	0	1	0	0	50	3	1861266	0.119494	1
OR2C3	272980	927	-14	72897	22836	0	1	0	0	50	1	1591821	0.119596	1
KIT	92734	649	0	236577	61710	0	1	0	0	50	0	1960299	0.119602	1
RGS14	942017	227	53	132528	41415	0	1	0	0	50	1	1838199	0.119603	1
KIFC2	2043455	200	36	189519	66198	0	1	0	0	50	0	1569150	0.119693	1
ZCCHC4	233874	611	49	126819	30789	0	1	0	0	50	1	1757481	0.119703	1
PTPRE	424354	683	-15	175131	44451	0	1	0	0	50	0	1449657	0.119723	1
CYP3A5	1395063	430	34	121704	32637	0	1	0	0	50	1	1686036	0.119741	1
ASPG	622747	468	20	134343	44253	0	1	0	0	50	1	1859319	0.119852	1
WDR20	1492356	237	43	138435	39072	0	1	0	0	50	0	2166516	0.119858	1
TBC1D5	103389	701	9	200409	50853	0	1	0	0	50	1	2773419	0.119863	1
ZMAT1	262044	NaN	16	155364	36597	0	1	0	0	50	1	2144769	0.120145	1
NFE2L1	1205950	255	20	176880	54285	0	1	0	0	50	1	2439624	0.120247	1
UNC93B1	1357582	356	31	139095	42570	0	1	0	0	50	1	1915848	0.120404	1
POU2F1	399046	569	0	172755	54153	0	2	0	0	50	3	2080221	0.120421	1
GPR137	1613996	257	65	126984	38940	0	1	0	0	50	0	1976700	0.12046	1
OR3A1	506514	628	0	70587	23265	0	1	0	0	50	4	2127576	0.120519	1
CSGALNACT1	171847	356	17	127017	33660	0	1	0	0	50	1	1747581	0.12053	1
SH3PXD2A	539433	300	35	256905	76725	0	1	0	0	50	0	2107974	0.120759	1
GFOD2	1157184	136	50	87747	27687	0	1	0	0	50	2	1683264	0.120852	1
ATAD1	335357	169	45	88275	22803	0	1	0	0	50	2	1692504	0.120911	1
SLC22A4	531594	238	44	128403	39105	0	1	0	0	50	1	1760517	0.120931	1
HAT1	537965	177	33	104148	24750	0	1	0	0	50	2	1995840	0.120968	1
RBM12	1423559	169	53	211167	66330	0	1	0	0	50	0	1728243	0.121064	1
PGBD5	286328	478	10	108603	29403	0	1	0	0	50	2	2075667	0.121272	1
OR2J2	162844	808	12	71016	22044	0	1	0	0	50	3	1739232	0.121459	1
HNRNPA2B1	915230	445	43	87615	21879	0	1	0	0	50	3	2145363	0.121479	1
PIWIL2	635115	144	37	233937	64053	0	2	0	0	50	0	1905156	0.121654	1
TNFAIP8	305890	296	55	48213	11682	0	1	0	0	50	3	1637559	0.121773	1
PEPD	302640	598	-23	118701	33561	0	1	0	0	50	2	2258091	0.121805	1
KRT71	1280474	464	36	123717	35277	0	1	0	0	50	0	1902747	0.121828	1
HGFAC	547964	412	46	153549	46827	0	1	0	0	50	1	2088306	0.12187	1
OPHN1	186481	NaN	-13	197736	50259	0	1	0	0	50	0	1607232	0.121885	1
UNC45B	634684	498	20	220011	64317	0	2	0	0	50	1	1836120	0.121984	1
HIF1A	252998	315	30	200013	51150	0	1	0	0	50	0	1624095	0.122007	1
RBMXL3	NaN	NaN	NaN	244398	72996	0	1	0	0	50	0	3748008	0.122156	1
TBC1D22A	310166	538	-25	125301	33297	0	1	0	0	50	2	2375439	0.122201	1
STK32A	95084	839	-7	102003	23727	0	1	0	0	50	2	1931523	0.122334	1
HOMER1	177305	593	37	86295	22308	0	1	0	0	50	2	1630101	0.122614	1
SH3BP2	643291	228	43	150711	46200	0	1	0	0	50	1	2036199	0.122642	1
CP	388273	312	10	259479	64251	0	1	0	0	50	0	2094279	0.122732	1
GFPT2	1453124	362	19	165495	44682	0	1	0	0	50	1	2233737	0.122757	1
ECE2	1453600	241	47	252384	72930	0	2	0	0	50	0	2034417	0.122885	1
GALNT14	94332	876	6	134046	35739	0	1	0	0	50	1	1805133	0.123025	1
CABLES2	1190359	252	33	110418	35607	0	1	0	0	50	1	1486848	0.123033	1
COMMD7	661510	132	45	50688	12177	0	1	0	0	50	5	1761639	0.123149	1
MARCO	152902	553	-2	125598	35475	0	1	0	0	50	0	1909149	0.123171	1
CYLD	279624	792	2	230505	60060	0	2	0	0	50	1	1905057	0.123187	1
ZNF689	2255010	158	60	114279	35310	0	1	0	0	50	2	2147871	0.123195	1
RASSF5	504163	288	21	106656	32043	0	1	0	0	50	2	2003661	0.12325	1
CCAR1	859993	256	45	280731	70620	0	2	0	0	50	0	2254659	0.123327	1
PSTPIP1	327336	436	33	102663	26730	0	1	0	0	50	2	1926705	0.123366	1
FAM119B	1160849	344	39	63723	18645	0	1	0	0	50	4	1870209	0.123522	1
PNLIPRP2	161760	618	-16	115137	29799	0	1	0	0	50	1	2428338	0.123551	1
NUBP1	257980	356	37	78903	20592	0	1	0	0	50	1	1663398	0.123601	1
FAF2	592072	239	47	108009	28611	0	1	0	0	50	2	2021712	0.123671	1
ZNF431	173248	1093	-42	140151	32802	0	1	0	0	50	1	1876611	0.123696	1
STOX2	169045	458	-14	214731	61776	0	1	0	0	50	0	1719234	0.123705	1
THG1L	243382	987	31	72600	18183	0	1	0	0	50	3	1742664	0.123749	1
DAAM2	53428	914	26	256839	69861	0	1	0	0	50	0	2054052	0.123842	1
SMOX	784685	231	26	137544	39270	0	1	0	0	50	0	2077053	0.123929	1
P4HA1	539936	354	44	136818	35046	0	1	0	0	50	1	1828101	0.123947	1
FAM69C	162468	969	7	96690	29436	0	2	0	0	50	2	1801008	0.124022	1
GTF2E1	307733	475	11	104181	28083	0	1	0	0	50	2	1943304	0.124075	1
C1S	2495896	211	52	165165	43824	0	1	0	0	50	1	2202717	0.124169	1
ZFP57	484408	755	34	126852	33825	0	1	0	0	50	1	1691646	0.124176	1
EHD1	3218288	209	61	124476	36003	0	2	1	0	49	4	1930335	0.12418	1
CCNJL	197942	448	33	101409	30459	0	1	0	0	50	3	2423487	0.124256	1
GOLGA2	1813435	201	46	242781	65208	0	2	0	0	50	0	1932777	0.124398	1
OR13G1	191710	995	-32	70653	20823	0	1	0	0	50	3	2343165	0.124524	1
SMCR8	957114	254	9	217404	61578	0	1	0	0	50	0	1727715	0.124613	1
C20orf185	515931	491	46	110187	37224	0	1	0	0	50	2	2045637	0.124626	1
WDR3	204177	596	-5	229944	60720	0	1	0	0	50	0	1827045	0.124634	1
TMCC1	614377	357	40	152097	43329	0	1	0	0	50	0	2280696	0.124748	1
TRIM55	277437	480	30	138534	37191	0	1	0	0	50	1	1837506	0.124816	1
PTH1R	442069	376	41	140613	41349	0	1	0	0	50	1	1860771	0.125092	1
ECD	653488	233	44	163878	43230	0	1	0	0	50	1	2168331	0.125109	1
KCND3	320241	623	23	152295	45309	0	1	0	0	50	1	2013165	0.125222	1
TRIM37	678139	530	13	236148	60159	0	1	0	0	50	0	1867239	0.125231	1
GRM4	1013590	629	35	211035	63690	0	1	0	0	50	0	1668513	0.125242	1
WDR78	334231	692	-14	209649	54879	0	1	0	0	50	0	1657293	0.125262	1
TRUB1	188808	343	9	82269	24651	0	1	0	0	50	3	1948848	0.125276	1
TPM4	803963	298	26	80850	20229	0	1	0	0	50	2	2169585	0.125407	1
MEPE	423426	538	1	126093	31317	0	1	0	0	50	2	2320098	0.125676	1
USP14	527535	689	-11	123486	29469	0	1	0	0	50	1	1625448	0.125729	1
ATE1	233024	427	-3	137808	34056	0	1	0	0	50	1	1811931	0.125863	1
FAM111A	542222	686	9	146652	36300	0	1	0	0	50	0	2174073	0.126085	1
FMR1	96476	NaN	-6	161502	32835	0	1	0	0	50	1	2117280	0.126214	1
FGD2	832054	220	41	156189	44583	0	1	0	0	50	1	2046198	0.126298	1
GK	82798	NaN	34	138732	35508	0	1	0	0	50	1	1817475	0.126299	1
ACVR2B	337567	514	28	121869	34650	0	1	0	0	50	2	2229546	0.126354	1
TRIM5	134136	838	5	135762	36993	0	1	0	0	50	1	1772892	0.126684	1
KCNJ1	194422	602	1	91575	25443	0	1	0	0	50	1	1880307	0.126684	1
GCC1	411207	619	-7	178563	52305	0	1	0	0	50	0	1394943	0.126725	1
RNF25	1033606	269	43	108570	32208	0	2	0	0	50	1	2167374	0.126727	1
CDC7	269978	454	-6	139590	35937	0	1	0	0	50	1	1822194	0.126729	1
PRKD2	1153249	224	32	206811	60984	0	2	0	0	39	0	1615086	0.126767	1
PELI1	379419	441	35	99429	27390	0	1	0	0	50	2	1810017	0.126942	1
NMT2	236087	620	23	121572	31185	0	1	0	0	50	0	1783188	0.127343	1
ADAMTS14	546305	566	37	288750	83985	0	2	0	0	50	0	2242680	0.127449	1
MICALCL	445785	318	-1	162030	47850	0	1	0	0	50	1	2102496	0.127454	1
MAN2B2	501896	278	33	235950	71346	0	1	0	0	50	0	1832490	0.127455	1
DCAF4L2	26672	994	-27	89859	27951	0	1	0	0	50	2	2369169	0.127491	1
FNBP1	559377	228	38	154011	35871	0	1	0	0	50	1	1996731	0.127559	1
CASQ1	841605	386	29	97647	24222	0	1	0	0	50	2	1764807	0.127803	1
PAK2	798731	446	41	127974	33495	0	1	0	0	50	1	1652376	0.128058	1
AMPD3	777397	378	27	188034	50457	0	1	0	0	50	1	2426919	0.128105	1
E2F4	1109491	150	46	98109	28611	0	1	0	0	50	2	1768206	0.128138	1
UBXN2A	240935	226	33	64086	15510	0	1	0	0	50	2	1678809	0.12826	1
WDR59	724091	165	28	235917	63756	0	1	0	0	50	0	1820511	0.12826	1
C7orf63	134871	1140	2	231429	57057	0	1	0	0	50	0	1785465	0.12829	1
SNAI2	16597	598	-22	63459	17226	0	1	0	0	50	4	1787049	0.128316	1
VN1R1	451095	869	-24	82269	22869	0	1	0	0	50	1	1662870	0.128557	1
SLC28A2	494393	471	23	157410	45045	0	1	0	0	50	1	2023659	0.128587	1
FRMD1	142012	702	-17	131307	37290	0	1	0	0	50	1	2650494	0.128718	1
TRAM2	421188	378	33	90024	24123	0	2	0	0	50	1	1766523	0.128777	1
ITGA5	653663	190	42	249381	74151	0	1	0	0	50	0	1915518	0.128844	1
RPGRIP1	722324	263	39	309870	81675	0	1	0	0	50	0	2378904	0.12891	1
TNFRSF8	517022	191	35	140844	41910	0	1	0	0	50	1	1805430	0.128943	1
SP100	478720	559	38	267927	60555	0	1	0	0	50	0	2055174	0.129017	1
CNOT4	579978	407	19	159621	44616	0	1	0	0	50	1	2040357	0.12929	1
FXR2	2013497	194	29	151635	45177	0	1	0	0	50	1	1937925	0.129313	1
SNTB2	1187512	NaN	32	123519	39732	0	1	0	0	50	1	1577565	0.129393	1
ANKLE2	779125	601	32	219747	64086	0	2	0	0	50	2	2199846	0.129438	1
FAM71D	479620	324	19	100617	27786	0	1	0	0	50	2	1793352	0.129478	1
GGT7	1040878	205	48	153087	49566	0	1	0	0	50	1	1952412	0.129569	1
PRKAG3	1077853	296	40	115599	34881	0	1	0	0	50	1	2316864	0.129576	1
TM7SF3	408250	320	26	135564	38379	0	1	0	0	50	0	1947957	0.129806	1
AMOTL2	303429	189	21	178992	56529	0	1	0	0	50	1	2277165	0.129873	1
EDAR	358833	424	14	107910	29799	0	1	0	0	50	2	1915749	0.129958	1
RPS6KL1	884998	232	41	125466	39468	0	2	0	0	50	1	2436390	0.130038	1
PAPSS1	144822	679	4	149952	40227	0	1	0	0	50	1	1905057	0.130046	1
DIAPH3	80757	890	22	294624	72666	0	1	0	0	50	0	2239611	0.130165	1
NSF	525541	203	12	182127	47058	0	1	0	0	50	1	2311518	0.130169	1
TANK	207004	370	26	104412	27951	0	1	0	0	50	1	2081706	0.13021	1
UGT1A8	320853	284	24	124476	35013	0	1	0	0	50	1	2481666	0.130214	1
RECK	866055	155	44	236181	60621	0	1	0	0	50	1	2198031	0.13028	1
HLCS	425948	486	61	170346	48741	0	1	0	0	50	0	1293369	0.130316	1
SRBD1	73148	419	28	240141	63393	0	1	0	0	50	0	1822821	0.13035	1
CDC23	1127160	314	50	145662	38082	0	1	0	0	50	1	1845855	0.130361	1
USP20	552898	184	42	220704	60555	0	1	0	0	50	0	1674090	0.13044	1
NEK10	107333	515	-15	177144	43725	0	1	0	0	50	1	2240964	0.130573	1
RHCE	667862	185	32	101178	26730	0	1	0	0	50	2	1784475	0.130759	1
POR	1063656	218	54	162525	45672	0	1	0	0	50	1	2050686	0.130896	1
CEP70	198996	515	16	149754	34188	0	1	0	0	50	1	1889481	0.1309	1
EZR	564251	163	55	143682	35805	0	1	0	0	50	1	1812657	0.130915	1
GIMAP8	557261	584	38	156651	42735	0	1	0	0	50	0	2226774	0.131118	1
SLC7A2	462453	253	2	174570	51546	0	1	0	0	50	1	2198460	0.131134	1
CD46	321738	372	8	105336	24354	0	1	0	0	50	2	1851993	0.131143	1
KARS	449343	354	18	157080	41118	0	1	0	0	50	1	1977261	0.131193	1
PLVAP	842088	211	43	104313	29436	0	3	0	0	50	1	2005938	0.131227	1
SPRY2	44501	729	60	72666	21582	0	2	0	0	50	2	1856415	0.131295	1
ELTD1	74049	903	-17	167541	43230	0	1	0	0	50	1	2106621	0.131331	1
CWF19L1	1070791	198	40	131571	33858	0	1	0	0	50	1	1653993	0.131357	1
CGN	1385164	176	31	282018	83490	0	1	0	0	50	0	2121174	0.131525	1
LRRC43	808864	187	12	152559	47322	0	1	0	0	50	1	1915122	0.131534	1
CARS2	532346	216	42	134970	38577	0	1	0	0	50	1	1693659	0.131583	1
ACTR6	184664	650	9	98637	23430	0	1	0	0	50	3	2215389	0.131613	1
LSAMP	121424	967	-6	79299	23760	0	1	0	0	50	3	1779921	0.131691	1
SCFD2	170883	852	18	158301	48312	0	1	0	0	50	1	1981551	0.131891	1
CRIM1	267484	414	-1	248226	66297	0	2	0	0	50	1	1916211	0.131954	1
PRKCD	845193	192	46	166353	41448	0	1	0	0	50	1	2080386	0.132009	1
KLHL34	93001	NaN	7	141933	49632	0	1	0	0	50	0	2001153	0.132117	1
TRA2A	432206	231	23	66693	20130	0	1	0	0	50	2	1692207	0.132134	1
TPX2	890615	237	23	181731	46761	0	3	0	0	50	0	1359930	0.132182	1
CNOT6L	152352	493	18	134673	35013	0	1	0	0	50	1	1681581	0.132204	1
44812	717720	356	59	127809	31185	0	1	0	0	50	1	1595220	0.132255	1
ISLR2	492755	317	46	164208	57750	0	1	0	0	50	1	2048211	0.132336	1
ZNF746	588536	467	17	147939	46299	0	1	0	0	50	1	1845063	0.132351	1
ANAPC7	964525	206	50	143847	38610	0	1	0	0	50	1	1792890	0.132431	1
CREB5	58752	518	26	126786	33396	0	1	0	0	50	2	2203278	0.13258	1
WTIP	707545	355	5	97515	33264	0	1	0	0	50	3	2170542	0.132713	1
ATXN3	356163	415	27	91707	19965	0	1	0	0	50	2	2314719	0.132781	1
LYAR	146135	584	35	94644	21384	0	1	0	0	50	2	1641222	0.132844	1
ABCD1	1910154	NaN	37	169587	55539	0	1	0	0	50	1	2105499	0.132921	1
RBM41	226335	NaN	39	100485	25740	0	1	0	0	50	2	1741014	0.13295	1
TBC1D2	490665	254	52	214104	63294	0	2	0	0	50	0	1592382	0.13298	1
KIAA0355	662469	216	-1	250008	72831	0	2	0	0	50	0	1856382	0.133192	1
ZNF434	1361831	303	29	115599	29931	0	1	0	0	50	2	1996632	0.133339	1
NUP155	339666	151	25	337392	89892	0	1	0	0	50	0	2497704	0.133585	1
ZNF793	257166	914	-56	98109	24354	0	1	0	0	50	2	1689534	0.133708	1
EIF3L	1385064	203	66	139194	33561	0	1	0	0	50	1	1717056	0.133738	1
DGKZ	811789	212	44	298716	89661	0	1	0	0	50	0	2205687	0.133923	1
ZNF75D	255033	NaN	36	123387	29964	0	1	0	0	50	0	1714350	0.13393	1
CD68	1957426	194	24	81543	25872	0	4	0	0	50	2	2037057	0.134061	1
HSPA12A	198263	480	-15	159489	45639	0	1	0	0	50	1	1961223	0.134138	1
CDKL2	485383	451	31	120813	30261	0	1	0	0	50	2	2072169	0.13421	1
ZHX3	383198	262	7	220374	64251	0	1	0	0	50	1	2708178	0.134221	1
IRS1	146164	493	-3	280269	89496	0	1	0	0	50	0	2063589	0.134297	1
FGR	732210	217	24	127017	34749	0	1	0	0	50	1	2449194	0.134321	1
MMP16	27285	939	-34	158070	41316	0	1	0	0	50	1	1940697	0.13434	1
SULT1A1	1141256	269	53	84084	21252	0	2	0	0	50	2	2091408	0.134605	1
OC90	100916	999	6	115467	31647	0	2	0	0	50	1	2190144	0.134606	1
MAP7	302036	376	16	177870	51612	0	1	0	0	50	1	2179221	0.134607	1
OSR2	113665	228	33	74184	19569	0	1	0	0	50	2	1841367	0.134863	1
MORN1	644518	302	30	118800	34452	0	1	0	0	50	2	2026167	0.13492	1
UXS1	125109	844	2	104313	26466	0	1	0	0	50	2	1778832	0.134938	1
ADD2	659649	592	24	193545	50391	0	1	0	0	50	1	2362965	0.135056	1
GHITM	216194	860	-26	81675	24255	0	1	0	0	50	3	1783254	0.135097	1
COL9A2	627703	373	18	163284	54120	0	1	0	0	50	1	1992672	0.13511	1
ATG3	302697	636	41	78936	18975	0	1	0	0	50	2	1343925	0.13514	1
KRBA2	772200	257	20	116655	30360	0	1	0	0	50	0	1603701	0.135256	1
NUP107	486884	294	31	228261	57453	0	3	0	0	50	0	1668249	0.135275	1
MPP7	245887	473	-2	141966	35343	0	1	0	0	50	0	1951356	0.135276	1
SIGLEC5	443199	644	-23	128403	38709	0	1	1	0	50	1	1564563	0.13531	1
TTC30B	380902	434	27	154704	43296	0	1	0	0	50	0	2119887	0.135664	1
JMJD4	595623	459	1	114510	34386	0	1	0	0	50	0	1568226	0.135736	1
OCA2	154909	1141	-61	198462	59829	0	1	0	0	50	0	1445136	0.135763	1
TRHDE	66026	995	-40	244398	67353	0	1	0	0	50	1	2181993	0.135809	1
ARIH2	1818938	241	37	124080	28182	0	1	0	0	50	2	2100747	0.135846	1
MEFV	1445318	253	37	181830	54186	0	1	0	0	50	0	2485461	0.135974	1
SLIT3	401911	706	20	365475	101013	0	1	0	0	50	0	2656269	0.136013	1
UGT3A2	173490	614	-9	124245	33759	0	1	0	0	50	1	2361975	0.136104	1
PLK1	530660	509	35	141372	41778	0	1	0	0	50	2	2387616	0.136159	1
AMH	1603571	240	27	120384	47817	0	1	0	0	50	2	2033064	0.136164	1
TNFRSF1B	516231	263	32	108702	32274	0	1	0	0	50	2	1834932	0.136223	1
RET	454068	563	-19	263175	78474	0	2	0	0	50	0	1909611	0.136232	1
EPHA10	445060	375	30	234597	75174	0	1	0	0	50	0	1701942	0.136256	1
IVD	880617	184	45	102399	28776	0	1	0	0	50	1	1941984	0.136409	1
DARS	440321	410	30	124212	30822	0	2	1	0	50	5	1975380	0.136622	1
SLC5A2	832764	558	-3	155793	49434	0	1	0	0	50	0	2118567	0.136628	1
MICALL2	706729	345	23	209583	65538	0	1	0	0	50	1	2524731	0.136783	1
MAMDC4	1921909	176	44	266871	81609	0	2	0	0	50	0	1927299	0.136864	1
TDRD1	279026	477	22	290994	72336	0	1	0	0	50	0	2097645	0.13711	1
LCAT	879834	158	50	102597	30756	0	1	0	0	50	3	2202915	0.137195	1
TMPRSS2	266466	454	61	128634	34518	0	1	0	0	50	2	2154768	0.137202	1
BRAF	305191	616	25	183084	51645	0	1	0	0	50	1	2198394	0.137203	1
UGCG	598588	172	14	95766	24717	0	2	0	0	50	1	1777743	0.137326	1
FANCD2	885389	170	41	366861	95172	0	2	0	0	15	0	655611	0.137417	1
CYP4A11	492091	578	5	124344	34650	0	1	0	0	50	2	2077449	0.137538	1
PPM1J	559669	325	27	116160	37884	0	2	0	0	50	1	2146881	0.137886	1
KIF4A	243320	NaN	45	301125	76956	0	1	0	0	50	0	2157309	0.137941	1
INTS3	1687837	175	33	253605	67650	0	1	0	0	50	0	1816716	0.137952	1
TMC8	527017	217	27	166815	55044	0	1	0	0	50	1	1986864	0.138262	1
SYN1	775214	NaN	38	162855	51579	0	1	0	0	50	0	2184039	0.1384	1
KIR3DL1	987531	620	-23	105798	29733	0	1	0	0	50	3	2249445	0.138441	1
ZNF507	298401	596	-66	225885	59433	0	1	0	0	50	1	2686167	0.138469	1
OR4L1	383274	768	-37	71973	20988	0	1	0	0	50	2	1735866	0.138512	1
SEC31A	775541	268	38	292347	80784	0	2	0	0	50	0	2085435	0.138522	1
KIAA1919	364757	424	30	119559	35772	0	1	1	0	32	1	1419693	0.138661	1
POM121	641244	332	59	221661	75240	0	1	0	0	50	0	1578786	0.138729	1
SQLE	518053	572	19	127842	36894	0	1	0	0	50	1	1516614	0.138785	1
PKP1	758588	193	23	178563	49137	0	1	0	0	50	1	2116290	0.138912	1
PIK3CD	533533	204	35	248985	70092	0	3	0	0	50	0	1769922	0.138996	1
CITED2	187396	504	14	63756	17127	0	2	0	0	50	3	1877733	0.13909	1
PDHA1	216523	NaN	39	104973	28875	0	1	0	0	50	2	1730784	0.13924	1
COL13A1	591993	561	26	173811	54879	0	1	0	0	50	1	2053326	0.139338	1
HPD	829168	195	44	97581	25080	0	1	0	0	50	1	1808268	0.139368	1
FBXO24	1651125	242	60	148038	43626	0	1	0	0	50	0	1969704	0.139415	1
TFAP2D	17771	1090	-15	105996	31317	0	1	0	0	50	3	2235354	0.139483	1
ACCN4	554323	403	33	153285	48378	0	1	0	0	50	1	1808499	0.139509	1
XAF1	936146	438	5	74184	17886	0	1	0	0	50	1	1372701	0.139556	1
C3orf21	431673	536	46	90387	27819	0	1	0	0	50	3	1904925	0.139568	1
ARHGEF37	609620	185	37	158400	47124	0	1	0	0	50	1	1867899	0.139576	1
PER3	370145	415	23	285186	79728	0	1	0	0	50	0	2018610	0.139578	1
CARD9	1194160	258	28	132396	36894	0	1	0	0	50	1	1560273	0.139659	1
MPEG1	542222	686	9	163713	49236	0	1	0	0	50	0	2174073	0.139665	1
FLAD1	1612870	224	35	145497	45573	0	1	0	0	50	1	1713822	0.139724	1
PTPN12	306142	489	24	190212	48675	0	1	0	0	50	1	2239017	0.139813	1
ITGAE	500884	176	28	283239	79299	0	2	0	0	50	0	2001219	0.139825	1
DYNC1LI1	434251	568	35	125664	34914	0	1	0	0	50	2	2061807	0.139877	1
ANUBL1	111914	603	36	171699	47685	0	1	0	0	50	2	1784970	0.139998	1
[truncated: 16,865 more rows]

## Sheet: TCGA-African-American
Table SVII. Mutation significance scores.
gene	expr	reptime	hic	N_nonsilent	N_silent	N_noncoding	n_nonsilent	n_silent	n_noncoding	nnei	x	X	p	q
GATA3	182932	675	-2	502524	154062	0	19	1	0	50	14	9604170	1.33227e-15	1.67528e-11
TP53	2069567	213	34	500418	138186	0	77	2	0	29	6	4662036	1.77636e-15	1.67528e-11
PIK3CA	401889	613	11	1278828	318654	0	37	0	0	50	11	9936108	3.21965e-15	2.0243e-11
CDH1	924096	240	30	1019952	296622	0	9	0	0	50	3	8267022	1.08246e-08	5.10432e-05
PTEN	259678	300	34	490536	114048	0	9	0	0	50	12	8299260	5.40718e-07	0.0020398
MAP3K1	200595	412	38	1737936	504954	0	19	0	0	2	0	1273806	7.46629e-06	0.0234715
MAP2K4	45834	583	-52	480006	123606	0	5	0	0	50	9	9810720	1.58729e-05	0.0427707
MUC4	920866	365	49	1375542	385236	0	12	0	0	50	7	11117574	0.00010678	0.251761
RUNX1	164915	429	45	563598	175122	0	7	0	0	50	6	10035414	0.000142996	0.299688
FBXW7	117295	501	51	988848	265032	0	8	0	0	50	6	10925118	0.000185441	0.349778
RPL37A	590718	460	37	113400	29970	0	2	0	0	50	6	10586376	0.00022434	0.384682
NPAS4	1963418	182	55	903474	280908	0	4	0	0	50	0	9549252	0.000504578	0.793112
RBBP9	414549	436	23	224694	56700	0	3	0	0	50	5	11452266	0.00123195	1
RAB42	816470	183	25	118746	35802	0	2	0	0	50	5	9384336	0.00150812	1
GPS2	1911735	206	36	394470	104166	0	2	0	0	50	4	10044000	0.00231599	1
HIST1H2AJ	267617	634	32	139320	49734	0	2	0	0	50	4	7056072	0.00286816	1
RFX5	1322568	174	42	695142	221940	0	4	0	0	50	1	10637244	0.00298811	1
RBP2	232582	754	21	165402	38232	0	2	0	0	50	6	10001394	0.00317423	1
AKT1	711772	247	36	577530	149040	0	6	0	0	50	7	8568990	0.00372672	1
OR4D10	430021	507	-1	344898	109998	0	2	0	0	50	8	9665892	0.00443868	1
RASGRF1	420514	488	42	1503360	406620	0	5	1	0	50	4	10217340	0.00453141	1
BRCA1	1466229	201	27	2239488	555012	0	7	1	0	50	8	8501922	0.00543253	1
C16orf87	469144	217	12	186786	46008	0	3	0	0	50	9	11103804	0.00556482	1
AFTPH	532219	332	21	1093014	292086	0	4	0	0	50	4	10281978	0.00564865	1
FGF6	291341	908	23	234900	75654	0	3	0	0	50	5	9446220	0.00574919	1
LYSMD3	86012	780	7	357210	94284	0	2	0	0	50	9	9376884	0.00619153	1
SLC27A4	1928973	188	64	740178	222102	0	3	0	0	50	0	10813662	0.00647449	1
CRYBA1	1533931	159	32	265842	59778	0	2	0	0	50	5	9823032	0.00678321	1
FAHD2A	255441	536	19	365310	107568	0	2	0	0	50	8	8528652	0.00688462	1
FMNL3	1919377	265	60	1209330	338094	0	4	0	0	50	0	10175220	0.00717415	1
RHPN1	1882843	237	35	764640	240894	0	3	0	0	50	5	9936918	0.0076021	1
HIST1H3B	408919	685	43	150660	50058	0	4	0	0	50	10	7682040	0.00763333	1
FAM19A4	263741	842	-15	170262	43092	0	2	0	0	50	10	9180216	0.00781724	1
CRYL1	346767	584	28	379566	101574	0	2	0	0	50	4	11178648	0.0083076	1
SEC16B	103475	499	-10	1245294	350244	0	5	0	0	50	5	11554650	0.00884982	1
CHRNA10	537999	403	23	495720	170586	0	2	0	0	50	2	10213614	0.00902232	1
KLHL12	422793	318	28	667926	183060	0	2	0	0	50	4	9363762	0.00909811	1
RARG	1677275	191	49	582066	169290	0	2	0	0	50	5	9114120	0.00919392	1
BAG4	705837	277	46	518886	156654	0	3	0	0	50	8	10549926	0.0102219	1
CBX1	1205950	255	20	224370	54594	0	2	0	0	50	12	11976336	0.0103421	1
TFR2	1884430	247	60	919836	283500	0	2	0	0	50	0	10456290	0.0104676	1
PTCHD3	345745	581	2	872856	252720	0	5	0	0	50	12	9702666	0.010757	1
MLL3	261375	616	16	5687658	1586790	0	19	1	0	1	1	1766448	0.0109191	1
SLCO1B3	151869	521	-24	833328	218862	0	4	1	0	50	18	14849406	0.0110657	1
SLC25A27	141781	596	1	381672	106272	0	2	0	0	50	4	9414306	0.011712	1
VCX	43100	NaN	-9	239598	64152	0	2	0	0	50	14	13255974	0.0119536	1
OR2T1	104321	936	-39	415530	123444	0	2	0	0	50	9	8299746	0.0120212	1
ILVBL	703673	419	1	719118	232956	0	3	0	0	50	2	8048160	0.0123766	1
TSNARE1	163885	685	12	596484	178200	0	3	0	0	50	5	8447814	0.0123996	1
PLK2	125347	446	5	813240	212220	0	3	0	0	50	4	7528788	0.012412	1
RNF148	53042	1027	6	348624	97524	0	2	0	0	50	6	10514610	0.0125069	1
NT5DC3	1181243	358	15	659664	167022	0	3	0	0	50	8	10209726	0.0125836	1
C10orf91	152612	271	-1	165402	52326	0	3	0	0	50	13	9415278	0.0128867	1
ALG14	275272	425	-9	247212	75978	0	2	0	0	50	9	9595746	0.0128945	1
HIST1H2BG	390169	544	57	142722	43902	0	2	0	0	50	11	6308280	0.0132661	1
OR7A10	963401	546	14	346842	105138	0	2	0	0	50	5	8993430	0.0135231	1
CCDC69	916138	407	56	356238	92340	0	2	0	0	50	4	8140824	0.013593	1
TMEM192	170385	595	0	318330	88938	0	2	0	0	50	6	9111852	0.0137818	1
TNFRSF10D	640871	237	45	447606	133164	0	2	0	0	50	4	10091790	0.0139527	1
PIWIL1	224466	621	-26	1024650	271026	0	6	0	0	50	11	11971638	0.0145716	1
KIF4A	243320	NaN	45	1478250	377784	0	7	0	0	34	5	7636680	0.0147507	1
ACTG1	3582152	268	26	431892	126036	0	2	0	0	50	3	8176140	0.0147848	1
CCDC109A	635147	218	34	408564	119232	0	2	0	0	50	5	9635598	0.016221	1
LCA5L	339359	346	25	793314	199584	0	3	0	0	50	4	9232056	0.0164294	1
SPAM1	87688	541	-19	612684	163458	0	3	0	0	50	7	9825300	0.0173463	1
DLG1	751489	417	36	1127358	291276	0	5	0	0	50	7	11483694	0.0182457	1
ARID1A	975965	182	27	2591676	778248	0	6	0	0	20	3	4815936	0.0183149	1
NAALADL2	58421	1139	-15	935550	251262	0	4	0	0	50	7	11758770	0.0189326	1
LRCH3	520915	322	36	834624	240894	0	2	0	0	50	1	9376074	0.0189578	1
FANK1	207005	738	-8	413100	110808	0	4	0	0	50	8	11044674	0.0191166	1
ZFYVE16	318922	590	33	1805004	473364	0	3	0	0	50	5	9750456	0.019311	1
PQBP1	834040	NaN	38	318006	84402	0	4	0	0	50	5	6823278	0.0195023	1
MSX1	132550	558	37	329670	115506	0	2	0	0	50	8	9410094	0.0197511	1
OR4X2	400891	509	-27	340524	102708	0	3	0	0	50	7	8929278	0.0199302	1
SCN5A	366751	578	25	2365038	674892	0	6	0	0	32	1	6445008	0.0199495	1
PNMAL1	1099113	393	25	510138	145962	0	2	0	0	50	4	9476514	0.0202375	1
CHRD	1433862	268	46	1083456	353160	0	3	1	0	50	5	11958354	0.0210175	1
VAMP5	1158965	170	43	135108	40338	0	2	0	0	50	3	8947746	0.0213326	1
ITGA6	381919	371	23	1335852	358344	0	3	0	0	50	2	9628794	0.0214621	1
TUFT1	1379189	176	30	474174	120204	0	2	0	0	50	6	10791792	0.0214882	1
KLHL28	228561	481	-22	658368	182412	0	3	0	0	50	10	11529702	0.0215642	1
ATF4	721040	467	72	405486	112590	0	2	0	0	50	6	9207108	0.0216498	1
FAM90A1	172474	438	26	519534	166212	0	2	1	0	50	4	9287946	0.0217665	1
CA11	1597109	242	31	378432	116802	0	2	0	0	50	7	9456750	0.0218223	1
GPR133	218974	468	0	1030806	291600	0	3	0	0	40	3	8915832	0.0231257	1
PCGF6	533950	125	43	416016	114210	0	2	0	0	50	5	8148276	0.0232296	1
BCOR	377184	NaN	42	1997784	589680	0	4	0	0	50	5	11379204	0.0233232	1
PSG8	386041	417	-19	500742	140778	0	2	0	0	50	4	8585028	0.0235688	1
IAPP	NaN	NaN	NaN	104004	31104	0	1	0	0	50	21	18072072	0.0240271	1
MAGEA11	NaN	NaN	NaN	500742	139320	0	3	0	0	50	21	18180288	0.0241785	1
KLF7	207002	598	20	347166	100440	0	2	0	0	50	7	8197686	0.0243547	1
DEFB132	1010597	348	24	112590	30294	0	1	0	0	50	8	9932868	0.0249268	1
DHRS9	303546	646	12	368226	106110	0	2	0	0	50	11	11729286	0.0253072	1
HIST1H4K	267617	634	32	113238	39366	0	2	0	0	50	4	7056072	0.025312	1
LRAT	73491	1036	-3	259686	80514	0	2	0	0	50	10	7666488	0.0253129	1
REC8	974559	220	41	642492	191970	0	4	0	0	50	6	11178810	0.0253509	1
RNF8	485024	426	37	611226	156654	0	2	0	0	50	4	10024560	0.0256963	1
SPANXN2	4811	NaN	-27	212058	54756	0	3	0	0	50	21	13069512	0.0258669	1
SPRR2B	687290	704	30	88938	22842	0	1	0	0	50	12	9751428	0.0259607	1
BNIP3L	194595	376	26	263574	66906	0	2	0	0	50	0	10147032	0.0259756	1
BTBD1	384974	679	27	562464	155358	0	3	0	0	50	6	11596608	0.0260298	1
CCNK	345332	429	2	668736	197802	0	2	0	0	50	3	9370566	0.0261222	1
ACVR2A	90992	951	-2	612522	156330	0	4	0	0	50	10	9324720	0.026344	1
WNK3	352631	NaN	25	2091258	577368	0	2	0	0	50	1	11359764	0.0264442	1
DLGAP1	368461	215	24	1144530	326592	0	3	0	0	50	3	9534510	0.0273662	1
GJA10	383829	567	24	621270	170910	0	2	0	0	50	6	12381660	0.0275018	1
NUP54	525212	403	38	598266	163782	0	3	0	0	50	5	9480888	0.0275702	1
PVALB	1248441	537	35	137700	31914	0	1	0	0	49	9	11771568	0.0279282	1
OR11G2	371813	563	-29	385074	118422	0	2	0	0	50	8	9239670	0.0279398	1
PRB3	311837	673	-1	341496	119232	0	2	0	0	50	7	7475004	0.0279402	1
KRT222	953708	269	13	353160	89100	0	2	0	0	50	9	9156564	0.0283659	1
ESX1	354255	NaN	47	452142	148068	0	3	0	0	50	5	9111852	0.0287072	1
CDKL2	485383	451	31	593082	148554	0	3	0	0	50	12	10172466	0.02886	1
NRIP1	103852	526	8	1326456	363366	0	3	0	0	50	6	10509912	0.0290658	1
TGFB3	226588	582	34	480978	132840	0	3	0	0	50	10	9083826	0.0293388	1
EFCAB3	344431	362	8	595836	142398	0	2	0	0	50	12	9716436	0.0294787	1
HNRNPH3	615189	250	20	415854	107568	0	2	0	0	50	7	8875656	0.0295863	1
PTGES3	2757565	164	43	207684	40662	0	1	0	0	50	5	12282516	0.0297316	1
TMEM144	135911	684	-9	416826	109026	0	2	0	0	50	13	13778262	0.0297406	1
ARL6IP5	264082	443	20	219348	60102	0	1	0	0	50	3	10498896	0.0301073	1
FAM164A	49383	969	2	385074	106758	0	2	0	0	50	10	10238724	0.0302925	1
CRABP1	505232	435	56	164268	42768	0	1	0	0	50	6	10332198	0.0304897	1
DGAT2	534135	418	46	451170	129600	0	2	0	0	50	8	10265130	0.0306082	1
PPP1R14A	1410213	301	-1	170262	52326	0	1	0	0	50	3	8003934	0.030686	1
KCNJ15	109140	246	56	427680	122472	0	4	0	0	50	6	9770220	0.0312283	1
PNCK	1716845	NaN	44	520020	149688	0	2	0	0	50	5	8693244	0.0313643	1
GAP43	43284	622	-2	327726	92664	0	3	0	0	50	11	9278712	0.0314512	1
RAD21	482614	426	18	761724	185004	0	2	0	0	50	2	8101944	0.0316114	1
TAS2R19	365490	676	-2	336312	100602	0	2	0	0	50	9	8123004	0.0316319	1
CALR3	808967	218	35	469638	109188	0	2	0	0	50	5	7799490	0.0317719	1
YPEL2	1000345	452	16	144990	35802	0	1	0	0	50	4	7285140	0.0319397	1
NDUFS5	682309	208	26	128304	31590	0	2	0	0	50	10	10483668	0.0319406	1
VAMP1	2702142	198	50	152766	40662	0	1	0	0	50	10	12230190	0.0323514	1
TCL1B	256627	582	30	151632	43254	0	1	0	0	50	7	9819792	0.032449	1
SAV1	458995	259	31	445986	121662	0	2	0	0	50	7	9027450	0.0326379	1
HIST1H2BM	267617	634	32	143046	43092	0	2	0	0	50	4	7056072	0.0326656	1
COPG2	298918	433	16	487782	123120	0	2	0	0	50	6	8919558	0.0328167	1
NAPA	794875	276	44	363852	87156	0	4	0	0	50	12	9835668	0.0330522	1
EDAR	358833	424	14	529740	146286	0	3	1	0	36	3	5800410	0.0331294	1
ZBTB11	548328	445	16	1226502	329670	0	3	0	0	50	6	8815068	0.033484	1
MRPL45	1101194	504	10	339066	89100	0	2	0	0	50	8	7260030	0.0335993	1
C1orf9	116362	506	10	1481328	393174	0	4	0	0	50	10	11289942	0.033849	1
SQSTM1	1610057	359	38	511272	146286	0	2	0	0	50	5	8216802	0.0338827	1
ACTRT1	938	NaN	-35	424440	125226	0	3	1	0	48	13	9215694	0.033915	1
APEX2	245504	NaN	8	591786	175608	0	2	0	0	50	6	10555272	0.0342327	1
P2RY13	67416	548	15	406296	114210	0	2	0	0	50	10	10221390	0.0343371	1
RAP2A	343135	533	28	212220	57996	0	1	0	0	50	4	9762768	0.0351868	1
LCE2A	169158	818	24	123444	34506	0	1	0	0	50	10	9184914	0.0352154	1
SFRS13B	376032	446	27	302940	86832	0	1	0	0	50	2	11136528	0.0352731	1
LASP1	1255539	159	41	318168	75492	0	1	0	0	50	1	10307412	0.0352783	1
SYDE1	703673	419	1	803358	284310	0	2	0	0	50	2	8048160	0.0353146	1
TAS2R31	365490	676	-2	351702	102222	0	2	0	0	50	9	8123004	0.035391	1
SNX12	790100	NaN	37	191646	53784	0	1	0	0	50	7	11287998	0.0359825	1
SPPL3	1410077	392	45	449388	131382	0	2	0	0	50	13	13517442	0.0360591	1
PPYR1	NaN	NaN	NaN	419742	130410	0	2	0	0	50	21	18171378	0.0361068	1
SH2D1A	216982	NaN	-14	152118	41796	0	1	0	0	50	5	7532352	0.0361597	1
GBE1	54244	720	0	841590	212544	0	4	0	0	50	9	8967024	0.0361634	1
DCUN1D4	70055	766	17	366930	79704	0	2	0	0	50	10	8964270	0.0363532	1
PRM1	632841	308	37	63018	15714	0	1	0	0	19	0	3353724	0.0368836	1
PRPF38B	743461	225	9	641844	165402	0	2	0	0	50	6	10975662	0.0370254	1
PMP2	191177	595	1	160866	39852	0	2	0	0	50	7	9295722	0.037153	1
CHEK2	515703	219	-8	697734	187272	0	3	0	0	50	6	10344834	0.0375476	1
MAFF	1604692	184	68	181278	63180	0	1	0	0	50	7	10261080	0.0375948	1
KHDC1L	NaN	NaN	NaN	151794	41148	0	1	0	0	50	21	18082116	0.0378597	1
KIAA1147	213663	781	17	531036	149364	0	2	0	0	50	5	8020134	0.0378955	1
MDP1	974559	220	41	214488	56214	0	2	0	0	50	6	11178810	0.037947	1
IFNA2	232155	466	-14	217728	58806	0	2	0	0	50	3	8366652	0.0381447	1
BTF3	439732	289	38	241056	70470	0	2	0	0	50	2	8185050	0.0383507	1
PRDX6	426891	390	12	260982	75816	0	2	0	0	50	5	12080340	0.0390815	1
ALDH9A1	321831	408	0	604584	171558	0	2	0	0	50	6	9961380	0.0391477	1
RPAP2	363408	559	0	733536	185004	0	4	0	0	50	12	8968158	0.0393503	1
CDKN1A	904665	228	37	183708	60750	0	1	0	0	50	5	8427726	0.0393575	1
LCMT2	823006	415	50	757026	244620	0	5	0	0	50	12	11189340	0.0399707	1
GTF2F2	613630	276	50	301158	76950	0	1	0	0	50	1	8515692	0.0405504	1
RPL22	627248	240	31	158274	36612	0	1	0	0	50	7	8377344	0.0405872	1
EMR2	1032767	448	29	968598	269730	0	3	0	0	49	7	10917666	0.0406034	1
TAB3	81645	NaN	13	818424	234738	0	3	1	0	50	9	10488042	0.040846	1
TBX20	154022	926	5	515646	150660	0	2	0	0	50	6	8341704	0.0412703	1
TMEM220	59041	801	-49	190188	54270	0	1	0	0	50	9	11426832	0.0417832	1
PROCR	1346435	168	46	269730	84564	0	2	0	0	50	4	10588482	0.0420196	1
RIN3	447158	623	42	1109214	345870	0	3	2	0	50	5	10733148	0.0422203	1
ASTL	821367	251	45	492804	152118	0	3	1	0	50	12	8817984	0.0424507	1
NAA10	2341816	NaN	26	285444	73224	0	1	0	0	50	6	13301820	0.0428397	1
PDE1C	124074	828	6	765288	193590	0	4	1	0	50	12	8783964	0.0429175	1
PRKAA1	211936	496	-11	679428	177390	0	4	0	0	50	5	9331038	0.0429237	1
CCDC91	96900	922	-5	537030	129762	0	2	0	0	50	6	8437770	0.0435102	1
UBE2G1	1040590	292	26	206388	52650	0	1	0	0	50	7	10294614	0.0435905	1
FAM158A	974559	220	41	244620	71280	0	1	0	0	50	6	11178810	0.043712	1
EDDM3A	956361	577	8	177228	40500	0	3	0	0	50	15	10625742	0.0438462	1
RNF185	699351	218	41	230526	62532	0	2	0	0	50	6	10580058	0.0439007	1
CCDC105	990597	524	16	570726	170910	0	2	0	0	50	6	8840016	0.043989	1
POLE3	390186	297	36	179010	42606	0	1	0	0	50	7	8824302	0.0441869	1
MXD3	942017	227	53	269892	81000	0	1	0	0	50	3	9023886	0.0443608	1
BLK	476916	493	55	595512	165078	0	3	0	0	50	7	6526494	0.0445014	1
HOMER2	457445	683	24	425250	107892	0	3	0	0	50	8	9889452	0.0445295	1
HPD	829168	195	44	479034	123120	0	2	0	0	50	8	8876952	0.0450396	1
C8G	1979517	188	34	236196	72414	0	1	0	0	50	5	9577278	0.045085	1
SSX1	603602	NaN	5	238950	50220	0	2	0	0	50	4	8766144	0.0453027	1
LRRC45	3814891	211	28	779868	229554	0	2	0	0	50	3	8120574	0.0455429	1
FAM69A	609398	372	13	505116	129114	0	2	0	0	50	8	9361332	0.0456008	1
SYP	724395	NaN	44	364176	106272	0	2	0	0	50	13	9596880	0.045751	1
HOXC6	1185281	279	54	270054	75978	0	1	0	0	50	3	8773920	0.0457663	1
HIST1H4D	398813	636	53	113562	39042	0	1	0	0	50	9	6206058	0.0457852	1
HIST1H2AK	228884	634	40	142398	49572	0	1	0	0	50	7	6736770	0.0460262	1
TMEM49	1018847	361	22	487296	127494	0	2	0	0	50	10	10362168	0.0462142	1
WAS	824559	NaN	27	570888	184842	0	2	1	0	50	9	11100078	0.0462305	1
IGFALS	1604603	288	36	693036	248832	0	2	0	0	50	5	9427428	0.0463144	1
CSF3	1652518	216	28	237006	74034	0	2	0	0	50	6	10327986	0.0466195	1
RBMS1	191666	366	5	491832	126846	0	3	0	0	50	12	8794818	0.0467186	1
EP300	1167197	154	42	2806326	773064	0	4	0	0	31	3	7094628	0.0467721	1
GIMAP8	557261	584	38	769014	209790	0	4	1	0	50	7	10931436	0.0470084	1
CFP	775214	NaN	38	547074	156654	0	2	0	0	50	9	10721646	0.0470262	1
KCTD8	73476	1109	-10	532818	160218	0	3	0	0	50	11	12266154	0.0471407	1
PIK3R1	48999	619	32	919512	227934	0	2	1	0	50	8	9182160	0.0478553	1
LSR	767246	472	7	740178	225504	0	3	0	0	50	7	7453944	0.0480361	1
C12orf45	514255	204	37	221940	57024	0	1	0	0	50	5	8506296	0.0482066	1
B3GNT1	1963418	182	55	462186	146286	0	1	0	0	50	0	9549252	0.0483418	1
DRAM1	340236	238	17	281718	78408	0	1	0	0	50	5	10663002	0.0486761	1
PGLYRP3	836876	556	24	399492	112752	0	3	0	0	50	12	13381686	0.048862	1
SDC1	532338	320	37	348300	112914	0	1	0	0	50	2	9406206	0.048883	1
SULT1C3	354622	708	-17	372276	83592	0	2	0	0	50	8	6605226	0.0491782	1
IFIT2	253000	263	27	550476	141102	0	2	0	0	50	7	8918100	0.0492435	1
PLEKHF1	222973	612	-63	314280	95904	0	3	0	0	50	21	13433526	0.0492634	1
SLC6A14	82720	NaN	4	764640	198126	0	2	0	0	50	7	12158424	0.0495676	1
BAALC	461588	584	15	168966	47790	0	1	0	0	50	10	9014166	0.0501433	1
SLMAP	788284	196	35	981396	241380	0	3	0	0	50	5	7437096	0.0502003	1
PSMB11	1261207	185	41	329022	110808	0	2	0	0	50	3	9816876	0.0502384	1
IARS	521598	409	42	1508058	397548	0	3	0	0	50	9	11727504	0.050573	1
ALDH8A1	152922	364	19	563598	160542	0	2	1	0	50	7	8892990	0.050597	1
IL4	717412	356	59	181764	49572	0	1	0	0	50	7	7831080	0.0506518	1
SHARPIN	2720766	211	27	435294	147906	0	2	0	0	50	11	11997882	0.050943	1
LYPLAL1	82669	735	-6	283338	72414	0	1	0	0	50	7	12218850	0.0510783	1
MTHFD1	640692	221	45	1104354	312822	0	4	0	0	50	3	10173276	0.0511621	1
FAM96A	740524	234	48	191970	50544	0	2	0	0	50	9	9802458	0.0515254	1
SYBU	133930	623	11	765612	222426	0	2	0	0	50	4	8562024	0.0521384	1
ACE2	179295	NaN	32	970218	238464	0	2	0	0	50	10	10686330	0.0527259	1
PMF1	2280435	211	36	243162	65934	0	1	0	0	50	7	10260756	0.0530292	1
RNPS1	2220466	233	46	353808	104004	0	1	0	0	50	3	10045944	0.0530394	1
C6orf192	129252	443	10	533790	157788	0	2	0	0	50	9	9899982	0.0531313	1
C13orf34	257535	685	2	669384	168480	0	2	0	0	50	5	8354826	0.0533832	1
SLIT2	44181	1366	3	1830114	470610	0	4	1	0	50	8	10088550	0.0534781	1
RPS5	1900140	270	-14	239112	69984	0	2	0	0	50	6	9129186	0.0536773	1
SHISA9	NaN	NaN	NaN	524556	153900	0	2	0	0	50	21	18194868	0.0537089	1
KRTAP6-3	22916	1048	-79	125712	37098	0	1	0	0	50	12	7398216	0.0539043	1
LCN10	1898901	190	39	234576	69174	0	1	0	0	50	9	11325744	0.053957	1
CENPL	441912	417	9	453114	126684	0	1	0	0	50	3	12628872	0.0539965	1
HIST1H3C	408919	685	43	150336	50382	0	1	0	0	50	10	7682040	0.0543025	1
FAM123C	607528	203	17	947538	312660	0	3	0	0	50	6	8835804	0.0543682	1
HOXC13	1257445	274	23	367740	116802	0	1	0	0	50	3	10196280	0.0544684	1
CCBL2	316278	598	5	548046	140130	0	2	0	0	50	8	9126918	0.0544714	1
C17orf101	2598845	179	36	442098	127980	0	1	0	0	50	1	9301554	0.0549892	1
C19orf40	481910	448	-16	249966	72738	0	1	0	0	50	5	8480376	0.0550417	1
SLC16A2	357915	NaN	14	693198	211734	0	2	0	0	50	7	10607112	0.0550909	1
PPFIA2	20298	1132	-25	1498986	395442	0	3	0	0	21	0	4020030	0.0554337	1
RAB6A	549152	224	37	297108	74682	0	3	0	0	50	5	10032984	0.0556052	1
RPGRIP1	722324	263	39	1521180	400950	0	4	0	0	50	6	11678256	0.0556838	1
C9orf30	245284	516	0	325458	80838	0	2	0	0	50	3	8713818	0.0561979	1
KPNA6	1351816	218	27	634716	174474	0	2	0	0	50	8	10266264	0.0565585	1
APTX	833170	286	-5	432054	107406	0	3	0	0	50	6	8440200	0.0566209	1
OXR1	124540	888	-2	1073088	286740	0	4	0	0	50	10	9739440	0.0568763	1
RAB5C	2150553	206	33	255960	70146	0	1	0	0	50	7	10004634	0.0569278	1
WDR26	519341	256	18	773064	217404	0	3	1	0	50	4	8351424	0.0570924	1
PHACTR2	346938	363	2	754434	218052	0	2	0	0	50	5	9141984	0.0572707	1
SOSTDC1	291856	699	-19	238626	65124	0	1	0	0	50	7	9352422	0.0574191	1
OCIAD2	256817	372	61	194562	44064	0	1	0	0	50	10	9537912	0.0577113	1
RGS7	134467	834	-27	602964	141588	0	4	0	0	50	12	8983710	0.0577346	1
XPNPEP3	969480	269	43	594702	164430	0	2	0	0	50	10	11392812	0.0578952	1
TRPC7	283872	588	23	1006668	272970	0	3	1	0	50	8	11413548	0.0579887	1
HSD17B11	502611	417	16	349272	101250	0	1	0	0	50	2	8017056	0.0581607	1
YY1AP1	2262876	167	29	939276	272322	0	3	0	0	50	5	11592072	0.0584906	1
ORC2L	641949	201	29	704052	169776	0	3	0	0	50	5	7517610	0.0584962	1
IL22RA2	124672	436	50	321570	75006	0	1	0	0	50	6	11399130	0.0587166	1
HNF1B	553994	403	28	648972	180144	0	2	0	0	50	6	8494470	0.0589001	1
RPL12	784133	209	45	201366	54270	0	2	0	0	50	10	9099864	0.0589349	1
CELA2A	554165	212	29	316386	92826	0	1	0	0	50	6	11160828	0.0589941	1
RB1	349930	450	41	1119096	285930	0	3	0	0	24	2	5573124	0.0590284	1
HIST1H2BE	398813	636	53	142236	43902	0	1	0	0	50	9	6206058	0.0590519	1
ZNF486	375734	904	-57	552420	131868	0	2	0	0	50	7	8088012	0.059147	1
FBXL13	720636	510	30	883062	224046	0	2	0	0	50	11	9837936	0.0592111	1
LDOC1L	216551	425	14	258228	91692	0	1	0	0	50	7	9863856	0.0594292	1
CDH9	39282	1140	-26	930204	243000	0	2	0	0	32	2	6986412	0.0597107	1
DUSP19	350474	524	20	255960	67716	0	3	0	0	50	12	10383228	0.0597597	1
ATP6V0E1	489007	309	40	100440	25920	0	1	0	0	50	3	7887780	0.0600982	1
OTUB2	200224	560	38	278964	73386	0	1	0	0	50	5	8764848	0.060188	1
MCF2L2	398145	606	24	1342008	341010	0	3	1	0	50	4	9581490	0.060278	1
OR2T27	141426	710	-10	355266	107892	0	3	0	0	50	10	13654332	0.060306	1
PM20D2	376032	446	27	501714	148068	0	2	0	0	50	2	11136528	0.0603163	1
NEK5	407938	432	42	866862	205740	0	3	0	0	50	5	10211346	0.0603269	1
HIST1H2BH	390169	544	57	142074	44064	0	3	0	0	50	11	6308280	0.0609874	1
KCTD7	615008	246	43	332262	98334	0	2	0	0	50	5	10349046	0.0611352	1
MT2A	653985	187	28	79056	16200	0	1	0	0	50	4	7467066	0.0615461	1
TBP	425191	598	-16	398358	109026	0	2	0	0	50	6	7791876	0.0620766	1
KIAA1324	994979	215	25	1191186	328050	0	4	0	0	50	8	9908406	0.0621009	1
ATP1B3	467997	345	28	334206	85698	0	1	0	0	50	4	9185724	0.0621942	1
ZFAND5	314501	333	18	258876	64314	0	2	0	0	50	10	12071430	0.0627398	1
EPHX3	557083	381	20	411480	128466	0	2	0	0	50	3	9995562	0.0630393	1
TMEM190	1028808	209	19	210114	59130	0	3	0	0	50	11	8280144	0.0636169	1
RNF2	346010	458	-1	403380	99630	0	1	0	0	50	4	10834884	0.0637277	1
DCAF8	866729	355	27	705834	189378	0	2	0	0	50	7	9892530	0.0640967	1
ILKAP	388991	248	29	468666	125712	0	1	0	0	50	4	12539610	0.0642764	1
KIF17	632832	208	35	1180494	348462	0	2	0	0	50	3	10109448	0.0643449	1
GBX1	611046	337	38	394956	137214	0	1	0	0	50	2	8247744	0.0643723	1
LSM2	2509866	183	32	116964	30780	0	1	0	0	50	4	10222686	0.0644805	1
ANKRD45	432542	423	4	318168	80838	0	1	0	0	50	4	8452026	0.0648478	1
SMR3B	264684	915	25	89100	31428	0	1	0	0	50	4	7932330	0.0651695	1
MLLT4	138570	643	-2	2186190	596646	0	4	0	0	23	4	5368356	0.0652583	1
ZNF606	1219985	694	-30	945108	222750	0	3	0	0	50	8	9734256	0.0653755	1
ITM2A	13949	NaN	29	309096	85536	0	2	0	0	50	8	11792790	0.0656303	1
WNT8B	1153157	264	50	403866	119070	0	2	0	0	50	3	9419328	0.0659649	1
PCBP2	1712232	191	56	440964	121338	0	2	0	0	50	3	10254276	0.0661899	1
LAX1	515575	280	39	480816	129600	0	1	0	0	50	1	8448462	0.066278	1
SNAPC1	246220	410	26	450522	104976	0	1	0	0	50	2	9150246	0.0663335	1
TARSL2	255024	469	2	966330	240408	0	2	0	0	50	5	10768788	0.0664673	1
DNASE1L2	2179404	224	39	344088	104976	0	1	0	0	50	4	8886024	0.0667603	1
MYL10	653305	246	45	273618	70956	0	1	0	0	50	8	10076562	0.0672383	1
SEC23B	414545	392	23	905094	251586	0	2	0	0	50	5	9969480	0.0672691	1
OR10G2	658946	624	20	339876	113076	0	2	0	0	50	6	10770246	0.0673548	1
GJD3	1220026	191	23	313794	116316	0	1	0	0	50	6	9641916	0.0674526	1
CAPN2	528883	407	2	845640	217728	0	3	0	0	50	5	9327312	0.0680677	1
EGFR	423489	336	-13	1537542	405972	0	5	0	0	50	4	8753022	0.0681334	1
BCL7C	1546514	207	48	248184	80352	0	2	0	0	50	9	10052424	0.068258	1
YIPF6	201571	NaN	12	278802	79380	0	1	0	0	50	6	8620992	0.0682964	1
SLC25A18	431029	390	-37	366282	109998	0	3	0	0	50	7	9390492	0.0683982	1
ATP6V0B	875223	214	39	242028	71928	0	2	0	0	50	8	9054828	0.0684048	1
SEMA4A	2294665	211	39	875286	262926	0	3	0	0	50	5	9640296	0.068415	1
TREM1	270628	607	34	269406	80028	0	2	0	0	50	4	6833646	0.0684661	1
HIST1H4J	267617	634	32	113238	39366	0	2	1	0	9	1	628884	0.0685189	1
MOV10L1	934225	242	31	1461726	389448	0	3	0	0	50	1	8115228	0.0685669	1
HIST1H2AH	227588	622	29	139482	49572	0	1	0	0	50	2	7830756	0.068765	1
AANAT	1202221	197	29	284472	90234	0	1	0	0	50	7	9441684	0.0690062	1
HIST1H2AG	227588	622	29	142722	50220	0	1	0	0	50	2	7830756	0.0703076	1
TSPAN16	1385739	197	31	284634	85698	0	1	0	0	50	8	10116090	0.0704139	1
RGS17	158803	677	1	254016	61398	0	1	0	0	50	9	9606438	0.070541	1
HIST1H2BJ	227588	622	29	143532	43578	0	1	0	0	50	2	7830756	0.0706914	1
PGLS	961640	206	42	287550	98820	0	1	0	0	50	9	10953630	0.0707366	1
MCTP2	46228	457	-17	1079082	280260	0	5	2	0	39	7	6162804	0.070833	1
HIST1H2BK	227588	622	29	144342	43740	0	1	0	0	50	2	7830756	0.0710792	1
CDKL3	910029	148	49	714420	174474	0	2	0	0	50	8	10368972	0.0711906	1
SIRT6	2256881	244	42	403218	130410	0	1	0	0	50	4	9779454	0.0714602	1
PRSS1	285408	636	11	290628	80676	0	1	0	0	50	9	11019888	0.0715509	1
OTOA	520295	466	45	1356750	380700	0	5	1	0	50	9	12045186	0.0716511	1
KDM6A	59340	NaN	36	1653534	445014	0	4	0	0	41	7	8666028	0.0721022	1
PYCR1	3798594	211	19	392850	127170	0	1	0	0	50	3	8408286	0.0722382	1
KIAA1274	549709	487	39	996138	290304	0	3	0	0	50	5	10609704	0.0726805	1
PPT2	2119974	392	28	363690	102870	0	2	0	0	50	6	10818522	0.0727913	1
C18orf45	299157	244	65	363042	97200	0	1	0	0	50	7	11158560	0.0735372	1
DDX55	929791	224	44	713934	188568	0	2	0	0	50	10	11817576	0.0737426	1
JSRP1	1603571	240	27	375678	121014	0	2	0	0	50	5	9980496	0.0739526	1
MGMT	83542	1073	-25	269730	87480	0	1	0	0	50	15	13255164	0.0739645	1
HSD3B2	409405	720	3	426870	122796	0	2	0	0	50	3	8945964	0.0740673	1
CLEC4E	321790	564	13	267624	62856	0	1	0	0	50	10	9876492	0.0747309	1
CHCHD6	250457	604	39	281880	76788	0	2	0	0	50	5	7398378	0.0749945	1
PSMA3	290719	552	26	316548	77112	0	1	0	0	50	7	9946476	0.0751221	1
PTGS2	275352	552	-19	711828	187758	0	2	0	0	50	10	11921742	0.0754027	1
VASH1	308800	471	39	420390	124902	0	2	0	0	50	2	7556976	0.0755239	1
C16orf93	1632278	158	61	350892	94770	0	1	0	0	50	7	10714680	0.0758049	1
C10orf129	321487	512	1	566838	153900	0	1	0	0	50	3	11502000	0.0764765	1
OR14I1	141426	710	-10	346356	108540	0	2	0	0	50	10	13654332	0.0765305	1
HRAS	1970020	236	42	250290	69984	0	2	1	0	50	9	9219096	0.0766042	1
GLDC	213479	411	26	1205442	329832	0	2	0	0	21	0	3041550	0.0766703	1
POLR2L	1799017	232	51	78408	23652	0	1	0	0	50	7	8538534	0.0767696	1
PLG	181774	624	-9	964872	253530	0	2	0	0	50	7	12249468	0.0771916	1
CHST2	319752	591	25	573480	200718	0	2	0	0	50	4	13138362	0.0772287	1
SPRED2	545446	346	36	496044	133812	0	1	0	0	50	3	9969318	0.0773085	1
RPE	181785	778	-2	296298	77436	0	1	0	0	50	8	9723402	0.0774739	1
LRGUK	239801	634	8	984474	257742	0	3	0	0	50	10	10019700	0.0775068	1
TSPAN8	233516	489	-31	285768	74844	0	1	0	0	50	9	10110906	0.0776178	1
C4orf33	98087	645	-2	243810	57510	0	1	0	0	50	11	9467766	0.0784698	1
SNRPB	652241	477	33	279288	90072	0	1	0	0	50	12	10928358	0.0786482	1
PPP2CA	838413	147	48	364824	98820	0	1	0	0	50	7	10501974	0.0787558	1
ANKRD11	1263742	322	40	3049812	855684	0	6	0	0	10	0	3772980	0.0787639	1
CCDC60	151508	727	1	659178	169452	0	3	1	0	50	5	8980146	0.0788236	1
NKAPL	273319	502	35	465426	123120	0	2	0	0	50	2	8059014	0.0788291	1
LUZP2	1913	1282	-32	422334	104976	0	2	0	0	50	21	12123918	0.0790452	1
STAG2	338292	NaN	7	1543536	370818	0	3	0	0	34	3	5519664	0.0793829	1
PREPL	433205	522	29	872694	216432	0	2	0	0	39	4	7739874	0.0797097	1
NR4A2	117105	440	4	690120	194886	0	2	0	0	50	5	6952716	0.0800906	1
HEMGN	467637	269	40	571698	143208	0	2	0	0	50	1	8368434	0.0801145	1
IFNA10	193208	498	-3	217566	60426	0	1	0	0	50	12	8348994	0.0802094	1
SPATA2	589377	181	48	582876	179658	0	2	1	0	50	9	8613378	0.0802856	1
C18orf55	150380	981	4	292248	80514	0	1	0	0	50	8	8739090	0.081252	1
MRPL22	516166	461	38	249804	64638	0	1	0	0	50	2	11771082	0.081385	1
TPI1	2822601	232	32	336312	94770	0	1	0	0	50	7	9402480	0.0815021	1
OR9Q2	637499	828	-25	350568	110646	0	1	0	0	50	4	7570098	0.0815601	1
NLRP2	982889	432	-21	1228770	344412	0	3	0	0	50	10	8587782	0.0820133	1
TRA2B	978158	213	30	338904	98010	0	1	0	0	50	6	8832240	0.0820453	1
TRIM50	902769	422	52	555012	168156	0	3	0	0	50	11	10805238	0.0820846	1
CCDC61	931670	261	36	613008	189864	0	2	0	0	50	10	9295236	0.0821903	1
CLEC1A	396940	445	-1	336150	84240	0	2	0	0	50	6	8969130	0.0829147	1
LAPTM4B	609859	175	39	363204	112104	0	1	1	0	50	6	9522522	0.0829242	1
KIAA1009	51818	807	-15	1701324	396252	0	3	0	0	50	6	12645396	0.0829361	1
SETD8	1167786	177	45	415530	113724	0	1	0	0	50	5	9654228	0.0835771	1
DDC	180088	561	11	571050	157464	0	1	0	0	50	2	9338004	0.0836394	1
GOLGA7	284397	522	28	172692	40662	0	1	0	0	50	3	9615672	0.0836954	1
PRG4	265627	419	-24	1567350	505440	0	4	0	0	34	5	8609328	0.0841743	1
CIB2	414873	271	56	228258	55566	0	2	0	0	50	9	7788150	0.0841759	1
ANGPT4	824412	579	36	587574	163296	0	2	0	0	50	10	8889588	0.0841932	1
TTLL5	415501	540	40	1517454	411966	0	3	0	0	44	2	7434018	0.08438	1
HNRNPA2B1	915230	445	43	430110	107406	0	2	1	0	30	6	4702860	0.0845239	1
KPRP	64902	818	18	647352	200232	0	4	0	0	29	5	5839128	0.0845455	1
AJAP1	5695	921	4	458622	151794	0	1	0	0	50	5	10715490	0.0846493	1
C3orf10	825905	170	39	92340	23328	0	1	0	0	50	6	7939620	0.0846821	1
TRAPPC9	327071	689	16	1442772	419094	0	4	0	0	50	9	11231622	0.0849735	1
RABEP1	1246822	382	24	1035666	255636	0	2	0	0	50	5	9786420	0.0850844	1
CCDC65	1696692	214	56	578016	142722	0	3	0	0	50	5	8701182	0.0851028	1
NDUFA1	772178	NaN	38	86184	22194	0	1	0	0	50	9	10280844	0.0851461	1
FNTB	501431	387	39	517266	142722	0	2	0	0	50	4	10872954	0.0852418	1
ZFP36L1	543449	259	46	375678	120528	0	1	0	0	50	5	8463204	0.0855666	1
CELA1	504747	239	33	304560	87642	0	2	0	0	50	7	8693568	0.0856183	1
HAPLN2	2049505	180	37	383616	123282	0	1	0	0	50	5	8680608	0.0857745	1
PTGER2	405022	533	18	392202	133164	0	2	0	0	50	8	12117438	0.0862496	1
SCGB2A2	3058870	450	42	115182	26730	0	1	0	0	50	4	7419762	0.0864574	1
GALNTL5	309129	476	12	528606	134298	0	2	0	0	50	10	9392922	0.0866435	1
RPS16	1410725	230	39	171720	52326	0	1	0	0	50	5	12607488	0.0868533	1
TNFSF4	293612	492	-1	213840	58320	0	1	0	0	50	3	11444490	0.0869292	1
TMEM202	1116695	366	41	321408	85860	0	1	0	0	50	6	8168364	0.0872356	1
OR13G1	191710	995	-32	346842	102222	0	2	0	0	50	9	11502810	0.0872836	1
PCNA	497537	385	25	310392	81324	0	1	0	0	50	7	8353854	0.0873568	1
LYRM5	260142	633	19	110808	25758	0	1	0	0	50	6	9221202	0.0873629	1
WFDC5	865186	324	46	148068	39528	0	1	0	0	50	6	12537990	0.0873634	1
SLC22A18	552601	256	34	473850	164268	0	2	0	0	50	4	9743004	0.0874319	1
CCDC50	100733	768	12	584334	141264	0	2	0	0	50	12	9691164	0.0874505	1
IRF9	974559	220	41	460080	129438	0	1	0	0	50	6	11178810	0.0874812	1
USE1	865138	212	38	306504	88128	0	2	0	0	50	7	8584542	0.0875246	1
GABARAP	1782958	316	21	142398	35478	0	1	0	0	50	3	7563294	0.0875619	1
ZC3H12B	321325	NaN	10	965844	263250	0	4	1	0	50	7	10734768	0.0876773	1
C1orf210	1091212	264	30	127656	42444	0	1	0	0	50	5	9719190	0.0878225	1
OR4S2	1295	1091	-20	354132	100764	0	1	1	0	49	5	7939458	0.0878489	1
C11orf57	389805	179	31	356562	81810	0	1	0	0	50	8	10274364	0.0879898	1
ZNF367	355218	400	23	399330	120204	0	2	0	0	50	6	10047078	0.0880039	1
SPSB3	1604603	288	36	411804	118908	0	2	0	0	50	5	9427428	0.0880707	1
C20orf103	74540	807	-42	330804	88614	0	1	0	0	50	10	10776240	0.0887977	1
SMC1B	461206	199	17	1490400	359316	0	2	0	0	50	2	8927496	0.088991	1
OOEP	732413	446	18	171720	50868	0	1	0	0	50	3	9204192	0.0890617	1
NAB1	504177	232	37	571050	154062	0	1	0	0	50	2	8782668	0.089358	1
RBMXL3	NaN	NaN	NaN	1199772	358344	0	5	0	0	50	21	18399312	0.0894692	1
CNPY4	1299015	205	52	296946	76302	0	1	0	0	50	1	9484290	0.0896491	1
NTRK2	17424	692	1	1021248	269568	0	2	0	0	50	12	9538398	0.0897737	1
C2orf69	214653	674	14	444528	120204	0	3	0	0	50	8	7647696	0.0898571	1
LCE3D	285984	752	17	106272	31266	0	1	0	0	50	8	10282626	0.0899385	1
MGC26647	NaN	NaN	NaN	291114	80190	0	2	0	0	50	21	18121158	0.0901258	1
ECE1	744763	196	27	967302	264222	0	4	0	0	50	9	11494224	0.090236	1
OR10A3	105341	679	6	352188	106596	0	1	0	0	50	10	11330118	0.0902633	1
ITIH4	1193949	272	49	1092042	311040	0	2	0	0	50	5	10244394	0.0904708	1
SIX3	133317	566	23	366768	120690	0	1	0	0	50	7	9305118	0.0905997	1
BACH2	294466	601	13	960174	275238	0	4	0	0	14	1	2830464	0.0906339	1
PRRT2	NaN	NaN	NaN	377946	125064	0	1	0	0	50	21	18166032	0.0907918	1
PIAS4	2296242	207	29	592758	172692	0	2	0	0	50	4	11739006	0.0912295	1
NT5C3	376609	359	13	421362	106920	0	1	0	0	50	7	11078046	0.0912481	1
HNRNPK	460176	343	2	568944	154224	0	3	0	0	50	5	8549712	0.0912622	1
ARFGAP2	1206881	273	24	623052	168156	0	1	0	0	50	2	9397620	0.0913078	1
FAM8A1	470794	339	13	460728	150660	0	1	0	0	50	6	10769598	0.0913208	1
TSNAX	291493	439	14	348948	85050	0	1	0	0	50	8	9538074	0.0915063	1
RASGRP2	2042840	230	60	716526	203958	0	2	0	0	50	2	10798434	0.091642	1
PPEF2	482292	429	45	895536	234900	0	3	0	0	50	8	9828216	0.0916723	1
ZXDB	80578	NaN	-18	887112	285120	0	3	0	0	50	12	10585404	0.0920182	1
LIN37	1151198	321	30	298242	79380	0	2	0	0	50	8	8691786	0.0921441	1
WDR74	2342595	181	71	452628	132516	0	1	0	0	50	7	11048886	0.0921869	1
FCRLA	598281	504	20	436428	131706	0	2	0	0	50	4	8510022	0.0922244	1
DAB1	22463	1004	-12	658692	177228	0	2	0	0	50	11	10854972	0.0922366	1
FHL5	116593	1376	3	349110	76140	0	2	0	0	50	8	10207944	0.0923615	1
PTPLAD1	602545	187	27	439020	109674	0	1	0	0	50	5	9338976	0.0929306	1
CASP6	211934	473	25	352026	89262	0	1	0	0	50	5	7379748	0.0930112	1
P2RY8	NaN	NaN	NaN	394308	132516	0	1	0	0	50	21	18173484	0.0932005	1
PARP10	2580629	247	28	1128168	387180	0	2	0	0	50	7	12845952	0.0932733	1
C19orf73	2011861	267	47	135756	53784	0	1	0	0	50	5	9391140	0.0934037	1
SNN	602364	214	40	100440	31266	0	1	0	0	50	8	9889452	0.0934197	1
GPR174	14321	NaN	62	380538	107406	0	2	0	0	50	8	11007414	0.0934899	1
2022-03-03	298349	603	27	289980	88128	0	1	0	0	50	2	11525166	0.0936814	1
MRFAP1	501655	278	47	146934	41634	0	1	0	0	50	4	8960058	0.0936996	1
C18orf10	174235	834	53	354780	95742	0	1	0	0	50	5	7562484	0.0937631	1
AQP12A	1077835	446	25	326592	111780	0	2	0	0	50	11	11789874	0.0938802	1
TAS2R1	349235	840	-18	338256	99144	0	2	0	0	50	7	8936568	0.0939184	1
FOSB	1259254	191	39	375516	124578	0	2	0	0	50	7	9923958	0.093986	1
MYCT1	188249	600	-9	265518	81486	0	2	1	0	19	1	3332340	0.0940359	1
FAM167A	483148	520	43	241218	74196	0	1	0	0	50	2	9768276	0.0940483	1
ARFGEF1	307618	642	26	2208708	562464	0	4	0	0	50	3	9303822	0.0941525	1
ZSWIM3	734138	136	53	794610	223560	0	2	0	0	50	8	9481698	0.0941534	1
STX3	395993	494	8	373248	93312	0	2	0	0	50	6	8944020	0.0941766	1
FAM49B	272194	242	6	394308	98982	0	2	0	0	50	7	10378692	0.0943515	1
MAGEH1	140844	NaN	-23	247374	73386	0	2	0	0	50	15	10862748	0.0943843	1
HOXA2	356045	385	28	425736	125874	0	1	0	0	50	7	10334952	0.0948304	1
OR10G4	107524	830	-5	343926	109998	0	2	0	0	50	7	8944506	0.0948777	1
POLR2J	642828	230	65	142074	36774	0	1	0	0	50	3	7101918	0.0951793	1
LCE3E	285984	752	17	106596	30942	0	1	0	0	50	8	10282626	0.0952486	1
COL6A3	423594	399	10	3631554	1108404	0	4	0	0	19	1	6613650	0.0952795	1
CKS1B	1612870	224	35	98658	21870	0	1	0	0	50	7	8413308	0.0953498	1
TANK	207004	370	26	512568	137214	0	1	0	0	50	0	10219284	0.0954307	1
CD109	706356	215	15	1711206	459270	0	3	0	0	50	8	9268020	0.0954532	1
DPCR1	2483101	261	36	1545642	490698	0	4	0	0	32	1	5478192	0.0956401	1
TMEM184A	595899	243	38	475470	142722	0	2	0	0	50	5	10058580	0.0958978	1
ZFP30	484296	888	-51	618516	147420	0	2	0	0	50	9	8019000	0.0960958	1
CTAGE5	314800	300	16	984312	248184	0	2	0	0	50	6	9962676	0.0962401	1
NECAP1	142724	300	23	325296	91692	0	1	0	0	50	9	9347238	0.09654	1
CPA2	424934	212	30	500418	133326	0	1	0	0	50	6	11001582	0.0968045	1
DDX21	860888	246	52	925668	245592	0	3	0	0	50	4	8414442	0.0973114	1
TRAPPC2L	860087	252	37	171072	43254	0	1	0	0	50	5	11143980	0.09735	1
DGAT1	2525749	200	28	580284	163782	0	1	0	0	50	5	11913966	0.0974404	1
SIAH1	170149	392	3	356400	103356	0	1	0	0	50	9	9972234	0.0977412	1
LCE3C	285984	752	17	109674	30780	0	1	0	0	50	8	10282626	0.0978602	1
ILF2	1656449	183	40	465912	130410	0	2	0	0	50	5	9683874	0.0980404	1
WDR85	1315685	404	41	527958	148068	0	1	0	0	50	4	9554436	0.0980582	1
HDAC3	771583	353	25	523260	130410	0	1	0	0	50	5	10462770	0.0981044	1
LRIT1	216124	810	-10	689310	227286	0	2	1	0	50	11	9771516	0.0981876	1
ZSCAN12	NaN	NaN	NaN	719442	178686	0	2	0	0	50	21	18219654	0.0982082	1
GPR26	208204	808	17	370818	126846	0	1	0	0	50	8	9561564	0.0982832	1
PHF1	1441897	236	31	693036	162324	0	2	0	0	50	9	9038628	0.0983007	1
PDE4B	103928	596	-8	1014444	263250	0	2	0	0	50	5	8963298	0.0983127	1
CCDC39	182757	1031	2	1145016	265356	0	2	0	0	50	4	8900118	0.0983409	1
CREB3L3	2256881	244	42	526824	164268	0	2	0	0	50	4	9779454	0.0983655	1
EXOSC3	489340	453	23	315900	94284	0	2	0	0	50	7	8017056	0.0986219	1
FBXL14	333350	216	28	462024	151794	0	2	0	0	50	7	11723940	0.0987295	1
SNAP25	168916	372	-41	306018	68688	0	2	0	0	50	10	9745920	0.0987354	1
OR8K5	10101	1007	-38	348300	100278	0	1	0	0	50	11	10420164	0.0990973	1
OR9Q1	690075	744	-13	349110	106272	0	2	0	0	50	9	10426482	0.0993374	1
SLITRK4	4706	NaN	-30	954342	269406	0	3	0	0	50	13	10257516	0.0994819	1
IP6K3	1558308	328	34	474336	132678	0	3	0	0	50	6	8577414	0.0995381	1
OR5H1	200002	811	-15	354132	102708	0	2	0	0	50	8	9596394	0.0997174	1
PHLDA3	842013	209	26	140940	47628	0	1	0	0	50	4	7811478	0.0997704	1
SLC45A1	971531	321	25	837054	268596	0	2	0	0	39	5	7280604	0.0997907	1
NR2F1	263987	505	-1	477738	144342	0	2	0	0	50	4	8756586	0.0998288	1
SUN1	642960	310	29	988848	280098	0	2	0	0	50	7	10699128	0.100259	1
EEF1A2	1262904	298	54	534276	155844	0	2	0	0	50	3	8558622	0.100356	1
RAB9B	472103	NaN	26	234414	62046	0	2	0	0	50	18	11554974	0.100412	1
ARID3C	731413	298	51	462186	151146	0	2	0	0	50	3	7399836	0.100489	1
GRM3	123690	1072	-18	1006506	284310	0	3	0	0	49	7	9502110	0.100674	1
FAM81A	613635	188	39	445014	108540	0	1	0	0	50	6	9377208	0.100812	1
SMURF2	937631	151	-8	897804	229230	0	3	0	0	50	7	7915158	0.101028	1
PRKAB1	782827	498	17	320112	86670	0	1	0	0	50	8	8204490	0.101121	1
PTCRA	1086050	203	41	307152	110808	0	2	0	0	50	7	7642026	0.101126	1
SH3YL1	304765	624	-18	405810	113238	0	1	0	0	50	5	8073108	0.101238	1
RIC8A	1463610	437	24	613656	188244	0	4	0	0	50	10	8297478	0.10137	1
FCN1	237562	489	35	387342	105948	0	2	0	0	50	7	9582948	0.10161	1
R3HDM1	561193	558	20	1299240	351216	0	2	1	0	50	7	8245638	0.101923	1
FAIM3	467839	385	39	445662	139968	0	1	0	0	50	7	10310652	0.102112	1
FOXR1	1457410	180	55	342468	95418	0	1	0	0	50	8	8521848	0.102221	1
POU3F4	12933	NaN	-23	406296	122472	0	3	0	0	29	7	7194744	0.102415	1
ABCB10	255826	277	20	827172	274590	0	3	0	0	50	6	8941428	0.102419	1
REV1	383815	639	27	1472418	395766	0	2	0	0	50	5	12830076	0.102667	1
ARHGEF7	405184	579	30	1061100	288036	0	2	0	0	31	2	5812722	0.103002	1
ZMIZ1	319778	442	39	1241082	356886	0	4	0	0	50	5	9561888	0.103561	1
BAP1	1078407	229	62	849690	245754	0	3	0	0	50	11	9508590	0.103957	1
PDXDC1	535071	214	23	937494	255636	0	2	0	0	50	7	9956034	0.10429	1
OR5P2	103028	823	-1	359640	111294	0	2	0	0	50	9	10154808	0.104711	1
TOMM6	NaN	NaN	NaN	87318	25920	0	1	0	0	50	21	18066888	0.105213	1
CD70	836909	212	21	214326	72414	0	1	0	0	50	2	7684470	0.105559	1
DYTN	269047	832	14	680400	185166	0	2	0	0	50	8	7723998	0.105651	1
FAM47A	7968	NaN	-15	882252	273456	0	2	0	0	50	9	10937754	0.105764	1
TSHB	605838	601	1	163782	43254	0	1	0	0	50	6	11309058	0.106051	1
IL9R	NaN	NaN	NaN	602640	173988	0	3	1	0	50	22	18214956	0.106367	1
AXIN1	1444992	205	40	986580	291114	0	3	0	0	50	5	14328900	0.106395	1
GPATCH4	2049505	180	37	461052	110484	0	1	0	0	50	5	8680608	0.106454	1
OTOP1	178901	584	34	690444	214002	0	2	0	0	50	11	9364572	0.106652	1
MED12	759088	NaN	27	2547126	713934	0	4	0	0	22	4	5400756	0.106785	1
FAM26D	261450	479	19	150012	39042	0	1	0	0	50	6	10616508	0.106882	1
CSAG1	NaN	NaN	NaN	94284	26730	0	1	0	0	50	21	18067698	0.106893	1
LGALS13	1148741	322	25	167670	43254	0	1	0	0	50	4	8638164	0.10691	1
SNX6	516968	165	10	510138	127494	0	1	0	0	50	6	10100376	0.107193	1
DPF2	4112809	242	50	471096	120852	0	1	0	0	50	6	9416250	0.107622	1
PRPSAP2	792064	224	1	440478	118422	0	1	0	0	50	7	9392598	0.107778	1
POPDC3	108747	650	2	336150	93474	0	2	0	0	50	9	9301716	0.107857	1
KRTAP12-3	874480	461	25	110970	32400	0	1	0	0	50	9	10301742	0.108047	1
CLEC2B	295505	634	25	184518	41958	0	1	0	0	50	4	9657954	0.108297	1
RGS22	290819	449	22	1528632	368226	0	3	0	0	50	5	10211994	0.108635	1
C6orf1	1074764	233	36	181278	57834	0	1	0	0	50	3	7666002	0.108721	1
CDC73	285984	442	-12	637794	168966	0	2	0	0	50	2	8210808	0.108803	1
MCM7	1503181	254	41	832680	244296	0	2	0	0	50	3	12388302	0.108876	1
DMC1	1160654	238	38	416988	105462	0	1	0	0	50	6	8266698	0.109299	1
STARD7	850399	251	48	436428	118098	0	2	0	0	50	8	11096838	0.109638	1
FSCN1	1965381	192	56	561330	166698	0	1	0	0	50	0	9642564	0.109892	1
NDUFB8	1153157	264	50	225828	56538	0	1	0	0	50	3	9419328	0.110143	1
HNRNPA3	374611	145	30	451494	120528	0	1	0	0	50	7	9700236	0.110397	1
TBC1D2B	435470	232	54	1123794	305046	0	3	1	0	50	8	8389656	0.110657	1
AFF2	97330	NaN	-13	1550016	428490	0	5	1	0	50	7	9733446	0.111038	1
GPNMB	505224	169	25	671166	183708	0	2	1	0	50	12	10134720	0.111047	1
TTC7A	785914	242	38	1006668	282690	0	2	0	0	50	6	9321318	0.111134	1
HIST1H2AI	267617	634	32	142722	50220	0	1	0	0	50	4	7056072	0.111149	1
C5orf41	486042	309	37	766422	194886	0	1	0	0	50	1	8189748	0.1112	1
HSD11B1	219540	222	15	346842	92988	0	3	0	0	50	12	7763688	0.111483	1
UBL7	640438	204	54	442422	132516	0	1	0	0	50	9	10426806	0.111504	1
SLC6A9	875223	214	39	827982	245592	0	2	0	0	50	8	9054828	0.111508	1
OR13A1	126925	808	26	370008	111618	0	2	0	0	50	8	9152190	0.11156	1
HIST1H2BL	267617	634	32	143370	43740	0	1	0	0	50	4	7056072	0.111624	1
DEAF1	1774224	236	57	649134	197478	0	1	0	0	50	2	8130780	0.11166	1
EMCN	231787	807	-5	316710	86670	0	1	0	0	50	12	8733906	0.111677	1
FBRS	2255010	158	60	513216	178362	0	1	0	0	50	7	10544094	0.111883	1
SNX3	336217	451	42	191646	51840	0	1	0	0	50	4	9402480	0.111959	1
PNMA2	194700	452	14	410022	122148	0	1	0	0	50	8	10059228	0.112342	1
SRPRB	513771	523	23	316062	92178	0	1	0	0	50	8	6980742	0.112732	1
NANOG	175700	467	16	364338	87642	0	1	0	0	50	9	9631872	0.113059	1
FOXA1	67481	487	-58	527472	164106	0	3	0	0	50	9	7936218	0.113078	1
GTF2A1	206731	456	-16	450036	115182	0	2	0	0	50	4	7369542	0.11308	1
C12orf48	229712	552	12	591786	153252	0	1	0	0	50	5	10392462	0.113294	1
MYO1H	438867	470	39	1232982	316872	0	2	0	0	50	5	9893826	0.113299	1
GTF2A2	521844	172	33	133650	34506	0	1	0	0	50	7	9664110	0.113345	1
KANK3	752886	204	7	903798	314118	0	2	0	0	50	9	10301094	0.113399	1
GABPB2	1614665	165	40	516618	152604	0	1	0	0	50	5	9269478	0.113402	1
RAB33A	339869	NaN	58	272646	76302	0	2	0	0	50	10	7881786	0.11344	1
SH3GL3	179993	757	-3	418608	104328	0	1	0	0	50	9	9888480	0.113557	1
SELS	372683	406	2	226152	63504	0	1	0	0	50	3	9376722	0.113596	1
VNN2	127166	569	2	602964	169290	0	1	0	0	50	6	11791008	0.113673	1
AGPAT5	130932	475	32	432216	113562	0	1	0	0	50	10	11130048	0.11377	1
ASPRV1	844060	221	37	380700	120852	0	1	0	0	50	7	7966836	0.113998	1
GIGYF1	1884430	247	60	1202850	352350	0	2	0	0	50	0	10456290	0.114127	1
CCDC22	635975	NaN	35	721710	225018	0	1	0	0	50	3	10183806	0.114157	1
PCDHB7	915569	724	-11	868158	289494	0	2	1	0	50	10	10938402	0.114185	1
TAS2R16	54952	972	-23	333720	93960	0	1	0	0	50	18	11409822	0.114383	1
SGCA	1277832	210	26	443070	141102	0	2	0	0	50	8	10858374	0.114443	1
POP5	1615212	311	34	197316	51516	0	1	0	0	50	4	9417384	0.114899	1
TEC	253162	404	42	771120	183384	0	2	0	0	50	9	9043488	0.114973	1
KHDRBS1	1216050	133	33	505764	157140	0	1	1	0	50	7	10450134	0.115034	1
ALX4	301098	575	9	466074	140454	0	1	0	0	50	7	9458532	0.11516	1
SIRPA	467799	486	41	578502	173340	0	2	0	0	50	5	10535346	0.115248	1
HCFC1	2355024	NaN	25	2247588	769500	0	4	0	0	50	4	13918068	0.115572	1
KCNJ2	31424	614	-44	488592	135432	0	1	0	0	50	9	10632060	0.115737	1
KCND3	320241	623	23	747630	222426	0	3	1	0	50	5	9882810	0.115906	1
ALG3	1460188	257	49	522774	160056	0	2	0	0	50	5	9430992	0.116186	1
PLS3	231348	NaN	3	761238	187920	0	2	0	0	50	10	9699750	0.116474	1
ANKRD30A	53742	1067	-43	1642680	381024	0	5	0	0	50	14	9059850	0.116478	1
C11orf86	NaN	NaN	NaN	130734	41310	0	1	0	0	50	21	18082278	0.116519	1
PKIB	139315	1035	-16	93636	25434	0	1	0	0	50	11	9289890	0.116542	1
PIPOX	1752742	236	34	454248	129438	0	1	0	0	50	9	10294614	0.116609	1
FBXL19	1508459	247	46	769986	262764	0	3	0	0	50	5	9366354	0.116679	1
MAML3	351118	591	8	1295514	369036	0	4	0	0	50	11	9535968	0.116855	1
TYR	28803	973	-28	619164	162324	0	2	0	0	50	14	10666566	0.116872	1
RBM6	1079795	152	39	1330668	347004	0	3	0	0	24	3	6835914	0.11706	1
GPR20	219865	239	41	385398	139968	0	1	0	0	50	8	8611596	0.117621	1
SSX7	250163	NaN	25	237006	52164	0	1	0	0	50	4	11027340	0.117681	1
RPTOR	782748	381	22	1570428	441612	0	3	1	0	50	8	13573818	0.117896	1
PEX11G	609287	308	36	269082	92502	0	1	0	0	50	3	10721808	0.117909	1
POLR1C	1278255	230	56	449550	126846	0	1	0	0	50	7	9081072	0.118217	1
GPX5	247624	576	27	270702	61722	0	1	0	0	50	3	10472166	0.118225	1
NUDT11	118616	NaN	31	188082	54918	0	1	0	0	50	5	9944046	0.118546	1
TRIM5	134136	838	5	666468	181602	0	2	1	0	50	8	8703288	0.118689	1
MTG1	485067	472	8	394308	113562	0	1	0	0	50	1	9357282	0.118746	1
LILRA5	742939	507	-9	381672	110160	0	2	0	0	50	7	8176950	0.118836	1
C12orf36	548501	509	5	161028	45522	0	1	0	0	50	6	9847494	0.118893	1
CHAF1A	2078211	278	37	1118772	304722	0	2	1	0	50	7	10746594	0.11923	1
PIR	193887	NaN	37	351378	90396	0	2	0	0	50	8	8344296	0.119235	1
IFI16	97615	866	7	860706	223074	0	2	0	0	50	8	9066330	0.119447	1
EFHA1	345194	422	31	527796	128790	0	1	0	0	50	7	10857726	0.119597	1
SFRP1	248918	632	-4	365958	97200	0	2	0	0	50	11	10754208	0.119645	1
IL1F10	672307	479	25	181602	49248	0	1	0	0	50	5	9499356	0.119735	1
TRH	329991	389	43	274428	83754	0	2	0	0	50	14	9808938	0.119986	1
PLXNA3	2220716	NaN	41	2141802	649782	0	5	1	0	38	2	6732396	0.120011	1
TNIP3	214178	900	4	407268	89424	0	2	0	0	50	7	8794332	0.120121	1
C1orf177	521961	249	25	520182	141750	0	1	0	0	50	5	8809884	0.120226	1
UNCX	748119	384	40	573804	205254	0	2	0	0	50	7	11924172	0.120272	1
PMCH	229712	552	12	196992	50868	0	1	0	0	50	5	10392462	0.12066	1
PLIN5	2111443	278	43	522774	167346	0	1	0	0	50	6	9772488	0.120861	1
C3orf18	603887	293	52	186948	57996	0	1	0	0	50	3	6948504	0.121101	1
PRKCE	172588	465	32	871884	231336	0	3	0	0	50	12	10895472	0.121197	1
PARP9	410045	404	35	1024326	266490	0	3	0	0	50	8	9174384	0.121222	1
C17orf97	248876	591	1	110322	39366	0	1	0	0	50	8	8244018	0.121229	1
MCRS1	2227486	224	53	563274	161838	0	1	0	0	50	6	10365408	0.121295	1
PRUNE	1617972	165	35	520344	155196	0	2	0	0	50	5	9064062	0.121387	1
PRF1	549339	573	40	616734	199746	0	2	1	0	50	5	10732500	0.121447	1
DDHD1	306643	448	20	1055916	293220	0	2	0	0	50	6	11173950	0.121458	1
PRAMEF12	141239	571	18	544320	166212	0	1	0	0	50	4	8009442	0.121489	1
BLVRA	690958	250	45	352836	94770	0	2	0	0	50	10	9650988	0.121547	1
GPATCH1	420460	212	-7	1099332	296460	0	2	1	0	50	6	9752076	0.121741	1
SF3B4	798975	560	17	475794	154548	0	1	0	0	50	10	10423566	0.121856	1
HPS3	382046	386	7	1176930	319464	0	2	1	0	50	7	11046456	0.121868	1
CD248	2133752	236	53	826686	279450	0	2	0	0	50	3	11140578	0.122043	1
NCOR1	954548	370	-18	2847150	799308	0	7	0	0	5	0	1884870	0.122284	1
OR51V1	109545	1056	-1	361584	107406	0	2	0	0	50	8	8189262	0.122403	1
OR2Y1	831824	515	18	343440	111456	0	2	1	0	50	9	8657604	0.12256	1
MECP2	2370576	NaN	29	570078	177876	0	2	1	0	50	8	13221792	0.122759	1
SERPINC1	443726	385	13	540918	149688	0	2	0	0	50	8	12435120	0.123085	1
SLC24A4	368522	642	27	716850	198774	0	2	0	0	50	4	10867770	0.123199	1
NPEPL1	1026997	504	15	540432	171072	0	1	0	0	50	5	8830296	0.123323	1
PATE3	NaN	NaN	NaN	121176	28026	0	1	0	0	50	21	18068994	0.123353	1
ACTRT2	308009	634	19	422496	129600	0	2	0	0	50	7	8916480	0.123383	1
ASPHD1	NaN	NaN	NaN	425736	148230	0	1	0	0	50	21	18189198	0.123482	1
PPP1CC	796153	347	50	387018	97038	0	2	0	0	50	8	8929278	0.123539	1
OR6X1	92984	637	-1	345222	110160	0	2	0	0	50	11	10007388	0.12367	1
BAZ1A	615028	184	24	1847610	473040	0	4	0	0	28	2	5515128	0.123708	1
TMEM60	253754	795	28	153414	43902	0	1	0	0	50	6	9291672	0.123726	1
RHO	779764	210	59	402570	115020	0	1	0	0	50	9	8698914	0.123877	1
KIAA2018	453036	419	24	2540322	744066	0	6	0	0	9	0	2264112	0.123887	1
KRTAP10-7	874480	461	25	421848	121986	0	2	0	0	50	9	10301742	0.123912	1
AUP1	1019591	315	50	472554	148068	0	2	0	0	50	7	9936594	0.123939	1
NUDT10	112254	NaN	3	190026	54918	0	1	0	0	50	6	11479158	0.124033	1
BATF	691659	175	49	147258	40338	0	1	0	0	50	4	6474492	0.124089	1
FLNA	2356905	NaN	27	3043656	906552	0	4	0	0	36	4	11541204	0.124152	1
CYP4A22	364960	414	3	611388	170100	0	2	0	0	50	4	9276768	0.124222	1
MPP1	1741051	NaN	3	563598	145476	0	2	0	0	50	6	10679364	0.124229	1
KCTD6	567081	265	35	275400	75492	0	1	0	0	50	3	9957816	0.12426	1
UBE2D2	641116	244	39	181602	45846	0	1	0	0	50	7	11862612	0.124701	1
OR13F1	146816	930	-33	356886	108702	0	2	0	0	50	8	8170956	0.124704	1
CYP4X1	388889	479	4	607824	157140	0	2	1	0	50	4	9164340	0.124716	1
FBXL18	1906749	195	34	796554	260496	0	1	1	0	50	3	10354068	0.124881	1
NDUFC2	556958	209	38	139158	39690	0	1	0	0	50	7	8909676	0.124947	1
KLHL1	4513	1341	-27	872208	239274	0	4	1	0	20	7	5020056	0.124948	1
TRAFD1	730140	239	40	687528	183870	0	2	0	0	50	5	11690082	0.124976	1
C19orf54	1127178	201	27	392040	130896	0	2	1	0	50	8	8942886	0.125122	1
C6orf225	145073	296	-5	94932	27054	0	1	0	0	50	12	9942912	0.125127	1
C3orf27	1046071	282	53	163620	55080	0	1	0	0	50	5	8563320	0.125189	1
C17orf63	1694459	152	36	33210	9558	0	1	0	0	6	3	1240272	0.125297	1
SLC25A41	865106	219	33	421686	131868	0	2	0	0	50	8	9535320	0.125332	1
FAM49A	8240	1427	-4	394956	96876	0	1	0	0	50	12	10017756	0.125632	1
EFR3B	NaN	NaN	NaN	969246	266166	0	4	0	0	50	21	18307134	0.125668	1
IRX3	99177	509	-42	548046	189702	0	1	0	0	50	7	9832428	0.125714	1
FAF2	592072	239	47	530226	140454	0	2	0	0	50	6	9924768	0.125762	1
CHPT1	347543	338	8	488592	138348	0	2	0	0	50	7	10145574	0.125832	1
GNRH1	178665	515	21	110160	30780	0	1	0	0	50	10	9463716	0.126032	1
AGTR1	271257	825	-24	408888	117936	0	1	0	0	50	8	8470170	0.126073	1
DDX43	723493	232	21	775494	201852	0	3	0	0	50	14	9312894	0.126259	1
SULT1A2	1141256	269	53	354618	91530	0	1	0	0	50	2	10266912	0.126314	1
TCF12	203021	599	27	870750	236358	0	1	0	0	50	2	9699750	0.126425	1
G0S2	218767	300	12	115668	37908	0	1	0	0	50	8	8229762	0.12692	1
ARSD	191640	NaN	18	742122	215784	0	1	0	0	50	3	9431154	0.127161	1
RANBP6	350338	339	24	1265220	348300	0	2	0	0	50	6	10400724	0.127361	1
OR5K1	416592	885	-4	351378	100116	0	2	0	0	50	10	9179892	0.127728	1
NCKAP5	36731	826	18	2190240	629532	0	7	0	0	13	0	2181330	0.128031	1
OR52D1	99343	946	-2	352026	115020	0	2	0	0	50	11	9853326	0.128096	1
PPFIA4	430455	453	42	816966	237654	0	3	1	0	50	4	8954712	0.128381	1
SLC16A5	1311590	159	28	567972	179496	0	1	0	0	50	8	11259162	0.129049	1
BARX2	287214	440	-19	320112	94932	0	1	0	0	50	2	9041868	0.129252	1
SMPD2	328699	559	47	494586	142074	0	1	0	0	50	6	8182134	0.129378	1
OSCP1	608987	181	29	513378	135918	0	2	0	0	50	4	7488612	0.129453	1
NUPL2	509506	218	23	490536	139320	0	2	0	0	50	5	8065494	0.129471	1
AZI2	68916	925	9	507708	121176	0	1	0	0	50	10	10686006	0.129577	1
TARS2	1532790	163	43	830736	251586	0	2	0	0	50	3	10602738	0.129702	1
NDUFA7	778783	209	14	132030	40986	0	1	0	0	50	9	10441386	0.129845	1
ZNF22	79469	905	15	265680	64314	0	2	0	0	50	15	9441522	0.129904	1
NR2E1	334933	436	35	449388	128952	0	1	0	0	50	9	8893476	0.129972	1
ILDR1	524127	715	38	580284	164754	0	2	0	0	50	4	8467416	0.129977	1
MEPCE	1479297	186	60	756054	255798	0	2	1	0	50	9	8064522	0.130144	1
PUM1	498145	189	36	1378782	395604	0	4	1	0	50	8	8590050	0.130173	1
DEPDC7	415951	215	25	627588	158760	0	1	0	0	50	3	7779726	0.130174	1
DCAF17	514096	271	38	621270	164592	0	1	0	0	50	0	8906598	0.130194	1
LSM14A	655485	284	-13	553716	154872	0	1	0	0	50	5	8720136	0.130225	1
PLA2G3	731144	218	40	582066	173178	0	2	0	0	50	7	11432178	0.130253	1
WDR12	596746	392	31	510948	130572	0	1	0	0	50	7	9601578	0.130915	1
HOXB6	946208	524	29	256608	75330	0	1	1	0	30	6	4607118	0.130979	1
HEXIM1	806811	207	32	408402	116478	0	1	0	0	50	11	10124352	0.130984	1
FBXL2	496632	352	15	507546	139806	0	1	0	0	50	10	11005308	0.131133	1
P2RY10	14218	NaN	50	390744	106920	0	1	0	0	50	1	8314002	0.13149	1
MAF	10920	1003	-30	448902	143046	0	1	0	0	50	12	10199844	0.131659	1
SMARCA1	278446	NaN	-7	1265868	318978	0	2	0	0	50	5	9464526	0.131709	1
MEF2A	197556	416	12	645084	179172	0	1	0	0	50	6	10343538	0.131894	1
CHI3L1	507603	453	31	452790	124578	0	1	1	0	50	12	10436040	0.132014	1
ZBTB49	146158	506	40	894726	235710	0	2	0	0	50	10	9744462	0.132048	1
RFC4	449980	384	25	432864	119232	0	1	0	0	50	9	9102456	0.132253	1
MRPL53	1069803	343	45	128142	40500	0	1	0	0	50	8	9032310	0.132256	1
C1orf114	286300	491	7	607176	144666	0	2	0	0	50	5	9679500	0.132373	1
KIAA0040	NaN	NaN	NaN	116154	29646	0	1	0	0	50	21	18070614	0.132491	1
HAUS8	945446	386	30	482760	135918	0	1	0	0	50	8	8659548	0.13251	1
TRIM49	151171	1107	-28	541242	130896	0	1	0	0	50	12	12743082	0.132848	1
STAMBP	1124858	404	43	500904	136242	0	1	0	0	50	8	9057582	0.132934	1
C6orf163	NaN	NaN	NaN	396900	92988	0	2	0	0	50	21	18133956	0.133038	1
DLGAP2	99986	671	-37	1122822	321570	0	3	1	0	50	10	11137014	0.133117	1
ESF1	123437	617	-10	1040364	227124	0	3	0	0	50	5	9857700	0.133215	1
GRPEL2	422727	380	28	258876	76464	0	1	0	0	50	3	8801460	0.133388	1
SEC62	398638	553	20	485190	112590	0	2	0	0	50	9	11410794	0.133568	1
THBS2	172423	720	-32	1391094	359964	0	3	0	0	19	1	5213322	0.133629	1
OR4K5	431654	854	-49	361098	110322	0	2	0	0	50	9	8240130	0.133652	1
KDM4D	304973	513	-12	589194	174798	0	1	0	0	50	7	9809100	0.133841	1
CNGA3	228601	630	29	798660	228258	0	2	0	0	43	0	5894856	0.134017	1
KRT3	1444461	422	38	717498	216108	0	2	1	0	50	4	10181538	0.134245	1
S100A3	1454773	186	26	122148	30456	0	1	0	0	50	9	8817498	0.134412	1
COG1	221646	251	-11	1128330	330156	0	2	0	0	50	8	11282166	0.134468	1
MYL6	2878044	171	40	200880	48438	0	1	0	0	50	5	9431316	0.134528	1
UCN3	711034	519	-1	181764	56376	0	1	0	0	50	7	10932084	0.134666	1
ABCA7	2387949	206	26	2421900	795906	0	3	0	0	50	6	14742972	0.134685	1
TMEM120B	796879	190	43	412128	104976	0	1	0	0	50	8	7897176	0.134687	1
GAS2	52076	981	1	373410	98982	0	2	0	0	50	9	8714142	0.134844	1
C9orf72	93979	434	-12	568620	154548	0	1	0	0	50	8	11021346	0.13495	1
NUP43	425807	234	39	449550	120528	0	2	0	0	50	6	7984656	0.13511	1
SSR2	1880483	213	32	211896	65124	0	1	0	0	50	6	10831968	0.135157	1
ZC3HC1	473377	146	38	584010	167832	0	1	0	0	50	4	8000046	0.135205	1
ART1	537999	403	23	371628	114372	0	1	0	0	50	2	10213614	0.135429	1
BCL10	348743	384	3	266976	78084	0	1	0	0	50	3	9170010	0.135459	1
CRLS1	301141	290	4	348624	108702	0	1	0	0	50	3	11471706	0.135671	1
LETM1	851373	239	44	856008	248184	0	2	0	0	50	12	10715004	0.135888	1
MON1B	60048	1058	-19	603288	205416	0	2	0	0	50	5	9424350	0.135938	1
BLOC1S1	1814311	384	26	151632	39852	0	1	0	0	50	5	7256304	0.136079	1
CCDC81	356405	283	12	784566	194724	0	2	1	0	50	12	9959922	0.136196	1
ZNF620	195638	546	22	500742	123768	0	1	0	0	50	9	9534672	0.136419	1
ICOSLG	1128093	219	76	355590	97848	0	2	0	0	50	11	9330228	0.136683	1
KLHL9	232155	466	-14	707778	193266	0	1	0	0	50	3	8366652	0.136693	1
TTLL10	2356409	196	27	789264	234738	0	2	0	0	50	5	12172032	0.136853	1
CCNT1	1705947	328	30	840294	236196	0	3	0	0	50	2	7800624	0.137266	1
APOA1	421374	323	39	310878	86670	0	1	0	0	50	2	8420274	0.137276	1
GLA	374364	NaN	37	508356	131220	0	2	0	0	50	7	9813150	0.137639	1
CDH7	4645	524	-49	912222	254178	0	2	0	0	28	3	4998348	0.137663	1
RBMXL1	316278	598	5	433188	136890	0	2	0	0	50	8	9126918	0.137699	1
HDAC1	1427362	210	43	588870	141588	0	1	0	0	50	1	11727504	0.137731	1
TKTL2	74744	1164	-26	701136	213030	0	1	0	0	37	2	7243506	0.137953	1
MKRN3	94496	904	-55	574128	166536	0	2	0	0	50	4	7790742	0.138246	1
ZNF547	432083	869	-17	473688	119718	0	2	0	0	50	6	8246124	0.138396	1
UNC5B	608276	559	34	1084590	325782	0	2	0	0	50	10	11455992	0.138692	1
CD5L	116471	778	28	405000	112104	0	2	0	0	50	10	9920556	0.138742	1
ZNF562	776094	617	-51	507222	125064	0	3	0	0	50	18	13749426	0.139214	1
SNAP91	181148	734	-28	1055754	322542	0	3	0	0	26	2	5568102	0.139354	1
MSMP	922448	190	48	161838	46170	0	1	0	0	50	8	9962352	0.139376	1
RASIP1	1635420	190	44	1056402	370494	0	2	0	0	50	8	9589104	0.139426	1
CSPG5	888051	200	35	604908	190188	0	2	0	0	50	6	10465524	0.139433	1
KPNA2	779255	283	1	616572	175608	0	1	0	0	50	6	9435042	0.139447	1
TH1L	1009250	152	30	699516	190350	0	2	1	0	50	4	9347400	0.139477	1
TDRD1	279026	477	22	1428516	355104	0	2	0	0	50	5	10297530	0.139484	1
MEN1	2261775	230	61	696600	219024	0	1	0	0	50	6	10532592	0.139606	1
PSEN2	428197	373	1	523584	150498	0	2	1	0	50	5	8083638	0.13968	1
NMT1	831501	191	28	592272	154710	0	1	0	0	50	9	10839420	0.139708	1
NEXN	367341	256	1	821826	187110	0	3	0	0	50	5	11546874	0.139956	1
TBCA	251029	581	40	135432	29322	0	1	0	0	50	7	8069868	0.140183	1
PLAC9	399614	626	2	112752	35964	0	1	0	0	50	12	10451106	0.140189	1
NME7	270055	491	12	455544	116478	0	1	0	0	50	9	9309168	0.140216	1
HNRNPH2	374364	NaN	37	516942	141102	0	2	0	0	50	7	9813150	0.140306	1
GPR143	125267	NaN	2	463320	142722	0	2	0	0	50	7	8795304	0.140473	1
C16orf3	NaN	NaN	NaN	130248	42768	0	1	0	0	50	21	18083736	0.140654	1
STK17B	140953	373	14	442422	115020	0	1	0	0	50	8	8454618	0.140921	1
HIST1H4L	228884	634	40	113724	39366	0	1	0	0	50	7	6736770	0.140943	1
TMOD1	523548	420	35	428166	114210	0	2	1	0	27	2	4346298	0.140996	1
ITPKB	508274	407	19	1063854	328536	0	2	0	0	50	1	9028098	0.141388	1
GBP2	337373	745	2	703890	178686	0	1	0	0	50	6	10757934	0.141791	1
SPOPL	85990	638	15	475956	116478	0	1	0	0	50	9	8885214	0.142044	1
CCL25	954819	369	13	179496	48438	0	1	0	0	50	4	6996294	0.142665	1
KHDRBS3	16039	1124	-24	408240	113238	0	1	0	0	14	0	2823012	0.142847	1
PDE7A	167106	425	37	617220	156006	0	2	0	0	15	3	3319056	0.142875	1
ARHGEF10L	375252	279	30	1485216	435456	0	2	0	0	50	6	11203758	0.14289	1
ECM2	579226	474	38	823284	214812	0	1	0	0	50	5	11339028	0.143188	1
FGF18	300840	347	30	242676	68364	0	1	0	0	50	4	9141498	0.143276	1
IQCB1	371177	520	32	714582	184032	0	3	0	0	47	8	9429534	0.143365	1
NIP7	1202748	125	20	211410	60264	0	1	0	0	50	4	8196228	0.143368	1
RXRA	300063	295	42	536868	155682	0	1	0	0	49	7	8607870	0.143519	1
HIST2H2AB	798975	560	17	142398	49572	0	1	0	0	50	10	10423566	0.143713	1
RPL23A	1695792	208	40	186624	51030	0	1	0	0	50	8	11612322	0.143763	1
SLC26A7	79500	987	-11	804816	214812	0	2	0	0	50	11	11256894	0.143816	1
SYT2	555792	497	34	497340	130572	0	2	0	0	50	10	11811582	0.1439	1
NLGN2	1906324	206	33	925020	306504	0	2	0	0	50	3	10713384	0.144009	1
DTNB	367255	356	44	758160	195858	0	2	1	0	50	13	9679500	0.14401	1
PHTF2	246673	730	25	910764	245916	0	1	0	0	50	11	20870946	0.144074	1
RSAD1	1332860	200	23	497988	164430	0	2	0	0	50	9	11002554	0.144279	1
THEG	901402	578	-17	442098	126522	0	1	0	0	50	10	9492390	0.14429	1
CA14	1213150	197	38	401922	110322	0	2	0	0	50	10	9588780	0.144313	1
AP1M1	814131	255	26	520668	138348	0	2	0	0	50	9	11370780	0.144531	1
TNNT3	827096	481	53	371952	76626	0	2	0	0	50	14	11395728	0.144632	1
OXSM	217009	717	-3	516618	158922	0	1	0	0	50	11	9770868	0.144738	1
NRK	18768	NaN	2	1857978	504468	0	5	0	0	50	6	9045594	0.145094	1
SULT1A1	1141256	269	53	412776	104328	0	1	0	0	50	2	10266912	0.145444	1
LCE2B	169158	818	24	127170	36612	0	1	0	0	50	10	9184914	0.145503	1
IGJ	262444	609	19	189702	49410	0	1	0	0	50	6	9647424	0.145557	1
PCOLCE2	398812	422	15	489078	133002	0	2	1	0	50	6	8150382	0.145572	1
DYNC2LI1	544941	480	35	473850	115668	0	2	0	0	50	10	11195820	0.14587	1
MAN1A1	105366	702	6	763020	211896	0	3	0	0	50	10	12329496	0.145886	1
XKR6	125681	704	26	714258	226638	0	2	0	0	50	13	20632482	0.14593	1
SLC6A13	316827	557	28	707616	198774	0	1	1	0	50	7	10848330	0.146148	1
GABRB2	11638	1049	7	602316	163134	0	1	0	0	50	8	11800728	0.146345	1
PLEKHM3	331278	370	20	885330	237330	0	1	0	0	50	4	11209914	0.146719	1
UBE2A	663615	NaN	48	185976	46818	0	1	0	0	50	7	8443926	0.146937	1
PSORS1C1	3178076	283	21	178524	52326	0	1	0	0	50	7	9582786	0.147174	1
HEYL	976856	358	33	364824	123606	0	1	1	0	28	5	5101380	0.147214	1
SLC35F2	392825	538	12	435132	125226	0	1	0	0	50	12	9164664	0.147395	1
C14orf159	240206	471	35	718794	211410	0	1	0	0	50	6	10871820	0.147487	1
GPR84	664708	190	45	438534	142236	0	1	0	0	50	11	10151406	0.147612	1
COL11A1	37620	742	-20	2181492	657720	0	4	0	0	19	0	3817692	0.147744	1
MASP2	639826	307	33	804006	225828	0	2	0	0	50	5	11851434	0.147796	1
CYP11B2	447193	438	36	580446	170910	0	2	0	0	50	6	9499518	0.14781	1
C10orf128	NaN	NaN	NaN	130896	35316	0	1	0	0	50	21	18076284	0.147951	1
SERPINB4	174293	370	-5	469638	114048	0	1	0	0	50	13	10134720	0.148268	1
OAS2	605960	433	54	875610	233442	0	3	0	0	50	8	11149488	0.148288	1
EEF1B2	332753	487	25	275562	68526	0	1	0	0	50	4	10000260	0.148304	1
GLB1	520588	372	29	802224	215460	0	2	0	0	50	4	10352448	0.148398	1
CLEC14A	13985	544	-50	533628	182250	0	1	0	0	50	9	9757098	0.148457	1
SDR16C5	435368	613	-7	365148	98496	0	2	0	0	50	7	6622074	0.148471	1
SHISA5	1480689	223	45	275724	85374	0	1	0	0	50	4	10287486	0.148528	1
PTGDS	1979517	188	34	227124	63018	0	1	0	0	50	5	9577278	0.1486	1
CRYGA	321897	440	5	206388	54594	0	1	0	0	50	4	7685604	0.148804	1
SCAMP4	1944774	239	36	272970	74034	0	1	0	0	50	4	10156914	0.148909	1
CTCF	1074126	147	45	865728	215136	0	3	0	0	50	6	10227546	0.148942	1
VAV3	132139	554	-11	1045710	254340	0	2	0	0	50	8	9777510	0.148982	1
LNP1	376655	410	13	214002	52812	0	1	0	0	50	7	11537640	0.149018	1
LAMB1	481432	406	11	2127384	542214	0	3	0	0	50	6	12134124	0.149158	1
FAU	3267059	207	46	156006	48114	0	1	0	0	50	8	9320832	0.149254	1
C11orf87	32039	927	-12	213030	75654	0	1	0	0	50	7	11860830	0.14926	1
HACE1	108074	924	-9	1090422	281070	0	2	0	0	38	6	8418816	0.149302	1
RAI2	61797	NaN	26	595674	180468	0	1	0	0	50	6	9091278	0.149326	1
AHCTF1	422581	405	4	2654370	733050	0	5	0	0	50	4	8612082	0.149494	1
ARF1	702621	391	5	215460	57672	0	1	0	0	50	4	7742466	0.149648	1
ZNF439	739660	633	-2	591138	141750	0	1	0	0	50	11	10977120	0.149796	1
RPS6KA2	235623	646	9	919026	252720	0	2	0	0	50	10	9937080	0.149874	1
SF3B3	905402	131	40	1417338	407106	0	2	1	0	50	10	9478944	0.150023	1
SNRPA1	372683	406	2	305046	84726	0	1	0	0	50	3	9376722	0.150105	1
PEX7	253053	408	33	387018	103842	0	2	0	0	50	12	10011438	0.150482	1
NAALAD2	131926	1141	-22	885006	230364	0	2	0	0	48	3	9896904	0.150555	1
ZNF221	464210	419	-38	735480	173340	0	1	0	0	50	4	9082692	0.150905	1
PAPD5	294222	418	24	813726	229716	0	1	0	0	50	4	9727290	0.150914	1
CLU	346863	361	29	594378	156978	0	2	0	0	50	6	9607896	0.151245	1
PTPN3	352374	431	12	1094310	286902	0	2	0	0	50	8	10345968	0.151392	1
RPL10	2277674	NaN	40	256446	68688	0	1	0	0	50	4	9360684	0.15157	1
DUOXA1	667418	544	27	593892	173016	0	1	0	0	50	10	12552894	0.151708	1
ST3GAL6	338260	516	10	400950	100602	0	2	0	0	50	11	9864828	0.151851	1
SOBP	288292	592	36	978642	307314	0	3	0	0	50	5	8329878	0.151886	1
ZC3H12A	446254	357	25	670680	213840	0	3	0	0	14	1	2321784	0.151946	1
ACTL9	536422	487	-47	452466	156492	0	1	0	0	50	20	14078124	0.151979	1
PLEKHA8	659459	466	26	535896	131382	0	2	0	0	50	8	10421622	0.152324	1
ITFG2	495532	443	28	525690	148878	0	1	0	0	50	10	9900306	0.152357	1
DNAJB13	533576	196	41	376812	98982	0	2	0	0	50	8	7317378	0.152405	1
STK38	942238	148	37	570564	134136	0	1	0	0	50	8	9914886	0.152503	1
H3F3A	866965	237	23	156168	49410	0	1	0	0	50	6	7304742	0.15253	1
MRPS12	1794625	282	21	154548	52002	0	1	0	0	50	8	9016758	0.152551	1
SLC2A2	167361	735	18	608634	176256	0	1	1	0	50	7	9652770	0.152751	1
C19orf33	NaN	NaN	NaN	130410	33372	0	1	0	0	50	21	18074340	0.152907	1
MRPL17	424776	548	8	199098	61398	0	1	0	0	50	8	9005418	0.153387	1
GABRR3	189744	702	0	558090	139320	0	1	0	0	50	11	10378854	0.153692	1
ZNF630	582390	NaN	18	775170	190026	0	1	0	0	50	5	9989568	0.153733	1
TBX18	28205	623	-12	687852	212220	0	2	0	0	50	7	11660436	0.153756	1
RNASEH2B	137500	621	34	398682	94122	0	2	0	0	50	10	9027450	0.153769	1
C9orf142	1979517	188	34	235872	75654	0	1	0	0	50	5	9577278	0.153858	1
RPGR	141269	NaN	28	1593594	385398	0	2	0	0	26	2	6849522	0.153884	1
ZNF213	1626425	234	44	521316	157140	0	1	0	0	50	10	10310652	0.154128	1
RBM26	161846	521	30	1155222	314928	0	3	0	0	50	10	10785798	0.154201	1
RBMX	275533	NaN	28	508194	106596	0	2	0	0	50	8	9783666	0.15421	1
PRICKLE1	175176	650	6	972810	255312	0	2	1	0	39	5	6603282	0.154225	1
KCNJ5	194422	602	1	480168	136080	0	2	0	0	50	8	9230598	0.154305	1
ANP32B	466644	269	42	309420	69660	0	1	0	0	50	3	8982576	0.154363	1
B3GALT2	NaN	NaN	NaN	485028	131706	0	2	0	0	50	21	18172674	0.154415	1
FGF22	1832767	218	10	186138	66582	0	1	0	0	29	7	7738092	0.154424	1
GRK1	785061	NaN	36	377946	105624	0	2	1	0	26	3	4109454	0.155038	1
UPB1	546252	171	51	454896	123930	0	1	0	0	50	9	8394516	0.155289	1
MGC42105	505867	537	26	500904	140130	0	1	0	0	50	9	9169038	0.155349	1
MSTO1	2230401	185	32	658206	200556	0	2	0	0	50	7	10777212	0.155526	1
SLFN12L	NaN	NaN	NaN	723492	184356	0	3	0	0	50	21	18225324	0.155597	1
COL20A1	1278630	332	62	1446012	467370	0	3	1	0	50	6	7783938	0.15573	1
PRSS35	185011	557	-30	474174	131382	0	2	0	0	50	11	11302578	0.155948	1
ASTN1	6547	940	-9	1513890	418932	0	3	0	0	50	6	11762172	0.156119	1
LGALS14	1243326	439	23	206388	54108	0	1	0	0	50	5	8094654	0.156429	1
ADAT2	299410	495	7	230526	60102	0	1	0	0	50	5	9481698	0.156483	1
LRFN4	NaN	NaN	NaN	673758	255474	0	1	0	0	50	21	18296442	0.156505	1
IL1RN	672307	479	25	243486	61236	0	1	0	0	50	5	9499356	0.157184	1
MRPL3	276806	843	15	414072	112266	0	2	0	0	50	8	7768548	0.157442	1
BOLA1	798975	560	17	149040	54108	0	1	0	0	50	10	10423566	0.157659	1
KRT79	1781225	288	27	614466	183546	0	2	0	0	50	5	8585838	0.157697	1
SLC6A18	657890	541	24	721872	216594	0	1	0	0	50	9	11933244	0.15775	1
GLYATL1	368006	741	-11	399168	100440	0	1	0	0	50	11	8273340	0.157826	1
IL1R1	232947	522	20	679752	170748	0	1	0	0	50	7	9828378	0.157852	1
C20orf202	NaN	NaN	NaN	140616	41634	0	1	0	0	50	21	18082602	0.157971	1
IFNA21	137739	498	1	218052	59940	0	1	0	0	50	5	8063712	0.158177	1
OR5H6	391500	849	-2	370170	105138	0	2	0	0	50	12	9417708	0.158382	1
ATHL1	1463610	437	24	839646	261630	0	2	0	0	50	10	8297478	0.158544	1
MAVS	740484	241	42	599886	200556	0	2	0	0	50	9	12073050	0.158849	1
PPP2R2A	194762	353	13	559710	130896	0	1	0	0	50	8	9422568	0.158946	1
TPRX1	881316	336	39	436752	166860	0	2	0	0	50	11	10240992	0.159111	1
GADL1	78546	487	-12	633906	155358	0	1	0	0	50	10	11830212	0.159167	1
RASA3	434290	406	58	1005534	256608	0	3	0	0	50	5	9863046	0.159448	1
CKMT2	182569	777	30	487458	142398	0	2	0	0	50	9	9925902	0.159536	1
TCP11L2	204762	396	18	612198	163458	0	1	0	0	50	4	7154568	0.159576	1
RASSF2	467742	485	32	389124	107082	0	2	0	0	50	11	9194472	0.159599	1
TBC1D29	488195	329	28	175932	52974	0	1	0	0	50	6	7697268	0.159626	1
FAAH	597667	255	28	666954	206874	0	2	0	0	50	6	10294452	0.159658	1
CRHR2	484075	433	32	488754	133326	0	1	0	0	50	13	9970614	0.159686	1
CYP27A1	1077853	296	40	609444	181764	0	3	0	0	50	16	11373696	0.15978	1
GALNT3	104274	888	-1	750222	191646	0	2	0	0	50	13	9825624	0.1605	1
TAF4B	173138	460	31	973944	311526	0	2	0	0	50	12	11064924	0.160642	1
TSC22D2	514603	176	19	854226	290304	0	1	0	0	50	3	8791740	0.160775	1
ZNF586	680410	849	-50	471096	120366	0	1	0	0	50	10	8200602	0.160842	1
S100G	294904	NaN	28	97362	23166	0	1	0	0	6	0	1109376	0.160944	1
ABCA12	526764	857	9	3077028	823122	0	4	2	0	50	6	9684684	0.160954	1
DYNC1I1	184459	747	-7	770148	202824	0	1	0	0	50	7	10231434	0.161016	1
PPP2R5A	485902	298	16	588870	144504	0	1	0	0	50	8	9088038	0.161064	1
C16orf90	805495	246	39	206226	64476	0	1	0	0	50	7	10028286	0.161165	1
FAM83A	519858	171	22	515322	160218	0	2	0	0	50	7	8652258	0.161205	1
EPC1	511962	189	15	979128	268434	0	1	0	0	50	3	10038006	0.161226	1
C16orf79	2179404	224	39	260982	82620	0	1	0	0	50	4	8886024	0.161548	1
CCL11	40425	871	-32	114534	32238	0	1	0	0	50	12	9086256	0.161765	1
HHLA3	296134	396	5	191646	37260	0	1	0	0	50	7	9276930	0.161835	1
CTSL2	339842	464	24	402570	99468	0	1	0	0	50	4	13056390	0.162073	1
RNF39	1820240	496	30	462348	159246	0	1	0	0	50	11	8596530	0.162209	1
2022-09-06	656561	NaN	61	528768	133650	0	2	0	0	50	7	8911782	0.162233	1
PPP1R15B	517418	230	28	807894	235062	0	2	0	0	28	1	6001290	0.162359	1
INSL4	372067	616	20	158274	48762	0	1	0	0	50	8	8620506	0.162488	1
FAM180A	470926	386	-1	197640	59940	0	1	0	0	50	5	7552764	0.162644	1
PON1	134258	327	-2	421686	113886	0	2	0	0	50	12	10487718	0.162709	1
FAM127B	304745	NaN	42	151146	46170	0	1	0	0	50	9	9352908	0.162855	1
GYLTL1B	427820	291	48	820854	257094	0	3	1	0	50	7	9471492	0.162881	1
SLC2A6	1858670	315	39	564894	194238	0	2	0	0	50	7	9396648	0.163024	1
PLEKHB1	547370	311	38	285444	83916	0	1	0	0	50	3	7801110	0.163138	1
EMP1	636324	203	-3	185976	52164	0	1	0	0	50	8	9899172	0.163189	1
EPS8L3	933010	190	27	703566	198936	0	1	0	0	50	7	10305792	0.163433	1
RAX2	2144458	206	34	201690	71928	0	1	0	0	50	6	8748000	0.163459	1
GINS3	695011	385	-1	294030	85050	0	1	0	0	50	3	8233002	0.163519	1
DNAI1	811768	370	49	846126	211410	0	1	0	0	50	7	11706282	0.163616	1
C16orf13	1115707	213	39	283824	61236	0	1	0	0	50	3	7722216	0.163799	1
TSPAN2	595238	555	4	264708	73548	0	1	0	0	50	7	12853890	0.16402	1
MSTN	508463	478	28	435780	116316	0	1	0	0	50	18	11394918	0.164083	1
MEIS2	74106	628	-7	600048	151308	0	1	0	0	50	8	9705258	0.1644	1
ZNF44	1474345	671	-10	785376	190512	0	1	0	0	50	6	10669320	0.164481	1
PIP5K1C	2156221	206	32	783270	226152	0	1	0	0	50	9	11887884	0.164494	1
EIF2S2	898361	357	55	408726	93798	0	2	0	0	50	8	7385904	0.164533	1
AP1M2	2036812	226	23	505764	134784	0	1	1	0	50	12	10160964	0.164628	1
ZNF277	169396	550	-8	553716	125226	0	2	1	0	50	8	10095030	0.164812	1
KRTAP21-1	30244	1055	-70	89424	26244	0	1	0	0	50	12	6566994	0.16487	1
SAP30BP	1898715	198	32	376002	94932	0	1	0	0	50	3	10009494	0.16493	1
TFCP2	530649	155	40	609606	150984	0	1	0	0	50	6	8102106	0.164938	1
KLHL33	NaN	NaN	NaN	584172	201204	0	1	0	0	50	21	18242172	0.16496	1
RHOA	1623187	201	33	229878	60750	0	1	0	0	50	5	8924256	0.164979	1
HSPBAP1	424676	412	39	577368	149202	0	2	0	0	50	8	10501488	0.165276	1
PCP4	177752	829	-71	78732	17982	0	1	0	0	8	1	1305720	0.165449	1
SMCP	59999	804	12	141588	30942	0	1	0	0	50	11	9810558	0.165453	1
BLOC1S2	1071291	198	56	174636	42606	0	1	0	0	50	10	11172978	0.165469	1
C1orf144	783285	176	42	183222	45684	0	1	0	0	50	9	10546848	0.165582	1
ALAS2	245504	NaN	8	713124	200556	0	2	0	0	50	6	10555272	0.165733	1
QSOX2	936497	244	40	800442	241056	0	1	0	0	50	8	12462174	0.165882	1
WISP3	159324	296	16	439668	112914	0	2	0	0	50	7	6995808	0.165953	1
EWSR1	854820	251	51	817290	227610	0	1	0	0	50	5	9537426	0.166149	1
SIX1	352813	482	5	320274	97200	0	1	0	0	50	3	8791902	0.166499	1
L1CAM	2328608	NaN	27	1478898	407754	0	3	0	0	48	3	11479806	0.166499	1
MLLT10	128481	488	16	1206090	336474	0	3	1	0	50	9	7998426	0.166646	1
TTC23	273585	361	-7	528444	144180	0	2	0	0	50	8	9543420	0.166731	1
ZBTB22	1456953	262	30	689958	237816	0	1	1	0	50	7	9531270	0.166954	1
ZDHHC15	101818	NaN	-11	444042	108054	0	2	0	0	50	14	12316536	0.167013	1
PSPC1	309425	481	34	611550	167994	0	1	0	0	50	7	8489934	0.167191	1
CADM1	29879	993	5	516132	147258	0	2	1	0	35	5	6849846	0.167263	1
ZNF619	195638	546	22	727704	192294	0	3	0	0	50	9	9534672	0.167344	1
MAGEB3	74310	NaN	16	400302	107568	0	2	0	0	50	12	9303822	0.167545	1
GUCA1A	524386	273	43	240084	60264	0	1	0	0	50	6	10132938	0.167582	1
TMEM180	871726	178	41	580284	190512	0	1	0	0	50	9	9823032	0.167755	1
GNPNAT1	307859	213	26	221616	57834	0	1	0	0	50	7	10860480	0.16776	1
OR4C13	11675	1171	-40	352188	101736	0	1	0	0	50	20	9566100	0.167852	1
NCAPG2	267997	565	-31	1365336	355104	0	2	0	0	50	7	11137338	0.167903	1
STAG1	245682	512	22	1524096	375678	0	4	0	0	50	7	10789686	0.167959	1
C9orf89	504920	448	61	214002	63990	0	1	0	0	50	6	8854110	0.167983	1
PEPD	302640	598	-23	582714	164754	0	2	0	0	50	9	11085174	0.168079	1
HIST1H2AL	228884	634	40	142560	50382	0	1	0	0	50	7	6736770	0.168142	1
SLC40A1	446631	511	-2	652374	195210	0	2	0	0	50	6	9565128	0.16821	1
PI16	832054	220	41	520992	167184	0	2	0	0	50	9	10044972	0.168357	1
TMEM217	626559	236	44	272322	68850	0	1	0	0	50	5	10332360	0.16845	1
TTC29	34493	970	-9	574776	140616	0	2	0	0	50	9	11192904	0.168534	1
C9orf116	298554	539	14	167508	37098	0	1	0	0	50	9	9450756	0.16864	1
ZDHHC22	531874	235	59	293544	95256	0	1	0	0	50	4	9520254	0.168884	1
JPH1	236544	478	-15	758160	217728	0	2	0	0	50	5	9850086	0.169098	1
HTATSF1	374989	NaN	23	907038	212706	0	2	0	0	50	4	10491282	0.169162	1
ACAP1	1911735	206	36	864918	257256	0	2	0	0	50	4	10044000	0.169256	1
ZNF200	1493009	253	42	465426	119718	0	1	0	0	50	3	12214314	0.169282	1
CLDN6	1443513	234	49	240084	84078	0	1	0	0	50	5	8624880	0.169497	1
C9orf114	1768145	201	34	447606	125388	0	2	0	0	50	10	9375264	0.169577	1
KBTBD4	995645	214	31	611712	177066	0	1	0	0	50	9	9446706	0.169597	1
PRSS54	742919	385	13	460080	127008	0	2	0	0	50	9	8887644	0.169659	1
RNF24	683635	170	33	209142	50382	0	1	0	0	50	7	9781722	0.169735	1
OAZ1	1603571	240	27	265356	77760	0	1	0	0	50	5	9980496	0.169811	1
PDE4C	1178047	210	43	877068	262602	0	2	0	0	50	4	10145412	0.169879	1
B4GALNT1	1329939	344	52	600372	197154	0	1	0	0	50	13	11218824	0.170085	1
SSRP1	926574	191	-11	851796	212544	0	2	0	0	50	9	7985952	0.170283	1
PPM1B	448266	420	32	584658	155520	0	1	0	0	50	9	9742032	0.170869	1
GJC3	1584669	391	36	312498	97686	0	1	0	0	50	5	8608680	0.170926	1
NHLH1	987855	526	28	143856	51516	0	1	0	0	50	10	8881002	0.170949	1
IMPG1	187724	674	-13	945756	248832	0	3	0	0	50	11	12788928	0.171004	1
LEPR	178338	528	-8	1473390	372438	0	3	1	0	50	9	10701558	0.171066	1
CREBZF	325720	554	-19	386694	130896	0	1	1	0	20	5	4331880	0.171218	1
C19orf43	1959466	226	29	200394	62532	0	1	0	0	50	8	10661544	0.171344	1
TSPAN1	908945	190	29	288360	78084	0	1	0	0	50	6	11671614	0.171376	1
CCDC136	830283	310	35	1382022	335016	0	3	2	0	50	9	10448190	0.171454	1
SYCP2L	269928	483	20	1004724	237006	0	3	0	0	50	7	11052450	0.171561	1
CISD3	NaN	NaN	NaN	148068	45360	0	1	0	0	50	21	18086328	0.171642	1
ALOX5AP	381672	451	76	192132	52812	0	1	0	0	50	7	8393220	0.171692	1
RGS13	306250	526	-13	198774	42282	0	1	0	0	50	8	10183158	0.171821	1
CALCR	197869	823	-10	615600	153738	0	1	0	0	50	11	10441386	0.172036	1
MCART2	415934	554	29	335178	100278	0	1	0	0	50	4	10334466	0.172158	1
TRPC6	70247	847	-24	1097064	285120	0	3	1	0	27	6	5247828	0.172236	1
ZNF417	1252385	750	-19	673272	170424	0	1	0	0	50	10	10880568	0.172339	1
SLC6A6	484954	242	47	730458	203148	0	2	0	0	50	4	8329392	0.172839	1
ATPIF1	779314	213	33	144180	36612	0	1	0	0	50	9	8356284	0.172866	1
KCNAB1	502198	782	4	678618	186948	0	2	0	0	50	8	11881728	0.172902	1
AMPD1	600650	472	11	933444	236358	0	3	0	0	50	7	9569826	0.172956	1
CWF19L2	147499	853	-10	1087020	251910	0	5	0	0	50	12	12805452	0.173161	1
CLRN3	434702	806	-25	261144	73710	0	1	0	0	50	4	7869798	0.173295	1
C8A	39104	713	-15	695304	177066	0	1	0	0	50	9	11410470	0.173471	1
TCTE3	233648	447	3	238788	59130	0	1	0	0	50	7	10705770	0.173554	1
MCM6	469154	395	29	969246	261306	0	2	0	0	50	11	10275822	0.173591	1
DTX1	562320	387	44	696438	224532	0	1	0	0	50	9	9935946	0.173705	1
THSD4	312827	505	3	1189728	328050	0	3	0	0	50	3	8877276	0.173753	1
RBL1	822888	309	42	1266030	337770	0	2	0	0	50	7	9467280	0.174082	1
MIPOL1	67481	526	-48	540918	126360	0	2	0	0	50	9	10240830	0.174223	1
CASP8	571730	386	37	693198	156816	0	2	0	0	50	6	9943236	0.174403	1
GJB2	405200	472	50	260010	72900	0	1	0	0	50	7	11593854	0.174412	1
ADCY8	45406	771	-7	1434510	424926	0	4	1	0	50	6	10414818	0.174466	1
WFDC2	1053862	382	36	148068	40500	0	1	0	0	50	9	8036658	0.174678	1
APOO	509881	NaN	41	243810	61884	0	1	0	0	50	8	12261456	0.174714	1
C3orf22	289633	508	52	162648	50220	0	1	0	0	50	11	10613268	0.174733	1
DCTPP1	2338593	142	59	192456	61722	0	1	0	0	50	8	10016136	0.174817	1
CDC6	1480458	191	23	657882	181440	0	1	0	0	50	7	8358390	0.175252	1
TTC23L	245995	558	-4	434970	112266	0	1	0	0	50	13	8269128	0.175295	1
CXorf40B	280868	NaN	34	182088	53622	0	1	0	0	50	7	8071326	0.175351	1
DPPA3	237142	672	14	188892	51192	0	1	0	0	38	5	6030126	0.175421	1
BMP4	252916	645	-3	462024	138186	0	1	0	0	50	12	8031636	0.175424	1
BTBD10	285926	458	10	561006	148554	0	2	0	0	50	9	10098108	0.175468	1
SETD4	219580	318	66	534924	142560	0	1	0	0	50	10	9459666	0.175534	1
TMED10	884650	154	47	256770	72738	0	1	0	0	50	6	10296072	0.175564	1
PODN	491749	391	14	742446	243162	0	2	1	0	50	5	9451080	0.175635	1
KDM5B	463071	378	35	1813428	489726	0	3	0	0	34	1	5384556	0.175911	1
SH3PXD2B	495571	267	42	1052028	300996	0	2	0	0	50	2	8707662	0.175987	1
PRKACA	1034381	321	36	434322	109026	0	2	0	0	50	12	10061982	0.176125	1
MAPK10	77738	549	-4	568620	137052	0	1	0	0	50	13	10526274	0.176302	1
IP6K2	1646019	212	45	715392	193428	0	1	0	0	50	10	10789524	0.176364	1
TMED3	259115	736	19	249642	73062	0	1	0	0	50	7	10987164	0.176486	1
ACO1	290567	424	-18	1047978	288522	0	1	0	0	50	2	8501112	0.176744	1
SOCS4	795059	144	37	512244	132678	0	1	0	0	50	9	8384148	0.176959	1
SLC4A2	622098	373	41	1405350	448254	0	2	0	0	50	8	11440440	0.176966	1
KRTAP19-4	14979	1035	-68	94932	28512	0	1	0	0	50	12	6447438	0.177015	1
HIST4H4	340728	578	-4	113562	40014	0	1	0	0	50	11	7164126	0.17707	1
SSR4	2103463	NaN	30	206388	58968	0	1	0	0	50	7	9527382	0.177138	1
CAMK2G	998685	191	42	713934	187596	0	2	1	0	50	7	11158560	0.177286	1
SYN1	775214	NaN	38	799470	253206	0	2	0	0	25	3	3784482	0.177479	1
TRAF7	2179404	224	39	798498	218700	0	2	0	0	50	4	8886024	0.177604	1
SIRPG	421072	486	32	442260	134136	0	2	0	0	50	8	7580790	0.177634	1
HIST1H4E	390169	544	57	112914	39690	0	1	0	0	50	11	6308280	0.17776	1
NDUFAF3	1799657	241	41	209304	68202	0	1	0	0	50	8	10322640	0.177829	1
DGCR6	621867	545	-1	253530	76464	0	1	0	0	50	6	10336248	0.178152	1
C1orf54	1213150	197	38	162648	40500	0	1	0	0	50	10	9588780	0.178246	1
GLUD2	339278	NaN	-6	628722	187272	0	3	0	0	50	9	7736634	0.178343	1
MYH7B	968413	236	40	2314494	661770	0	6	1	0	50	7	10343862	0.178417	1
BIRC3	462955	280	5	712476	185166	0	1	0	0	50	8	10591884	0.178421	1
KRT4	1781225	288	27	684126	198936	0	2	0	0	50	5	8585838	0.178705	1
FOXA2	49625	627	-66	522612	155844	0	2	0	0	50	9	9539370	0.178916	1
SERAC1	572602	209	40	780516	205092	0	1	0	0	50	6	9150732	0.179032	1
C13orf28	191446	610	-22	240246	58158	0	1	0	0	50	9	12047778	0.179051	1
SLC16A6	764688	237	11	598752	174960	0	2	0	0	50	8	9888804	0.179356	1
KIAA1586	431412	348	29	919188	235548	0	1	0	0	50	5	10230462	0.179549	1
RNF183	426351	312	26	214974	68364	0	1	0	0	50	6	8394354	0.179838	1
THSD1	384523	370	28	966006	285444	0	2	0	0	50	3	9215694	0.180128	1
METTL6	507426	256	49	338580	84726	0	1	0	0	50	3	8522658	0.180131	1
CHML	NaN	NaN	NaN	754272	203634	0	1	0	0	50	21	18244602	0.180169	1
TM7SF3	408250	320	26	665496	188406	0	1	0	0	38	5	7443414	0.180262	1
FAM166B	1108352	300	27	253206	73872	0	1	0	0	50	5	8497062	0.180301	1
CCNY	158899	591	2	407754	108378	0	1	0	0	50	3	8815716	0.180368	1
MTSS1L	880781	184	34	847422	270378	0	1	0	0	50	7	10318104	0.180545	1
RABL5	838595	278	46	226800	54594	0	1	0	0	50	9	11854188	0.180749	1
THADA	428893	408	38	2306394	614466	0	2	0	0	32	3	6800922	0.180776	1
SLCO2A1	547213	487	21	744552	219672	0	3	1	0	50	7	7834806	0.180875	1
GLYR1	706891	195	33	658692	179172	0	1	0	0	50	8	8869014	0.181151	1
CLCNKA	886121	197	43	798984	241056	0	1	0	0	50	6	9146196	0.181204	1
SLC13A5	800049	424	7	656424	195534	0	1	0	0	50	4	6511104	0.181228	1
DAND5	1886809	335	40	207036	72900	0	1	0	0	50	6	8277552	0.181337	1
DBNDD1	1056657	221	35	218538	65286	0	1	0	0	50	6	7460262	0.181598	1
IMPA2	336901	181	48	333396	101574	0	1	0	0	50	3	8083638	0.18187	1
ZNF207	679038	286	30	578664	164430	0	2	0	0	50	8	9717246	0.181876	1
RAD54B	544647	412	23	1078272	277182	0	3	0	0	50	5	10660896	0.18191	1
SLC44A2	2082774	226	33	855684	232956	0	2	0	0	50	10	8181000	0.181976	1
ZNF546	1181917	521	22	989010	241056	0	3	0	0	50	8	10429560	0.182121	1
GP5	324325	269	27	605556	214326	0	1	0	0	50	2	11761686	0.182304	1
NUAK1	143018	473	7	759132	217728	0	2	0	0	50	4	8195742	0.182488	1
OR51B5	100115	1056	1	347004	109350	0	1	0	0	50	4	8086716	0.182737	1
C19orf46	984653	303	21	454896	150174	0	2	0	0	50	11	9632844	0.18296	1
KIAA1704	685405	245	40	409860	101412	0	1	0	0	50	5	11680200	0.183115	1
CGB1	2070141	200	35	173016	59292	0	1	0	0	50	8	8256006	0.183224	1
WNT10B	1737773	214	55	438210	138186	0	1	0	0	50	2	8451702	0.18346	1
TBC1D10A	622382	211	50	587898	170748	0	1	0	0	50	10	8522658	0.183541	1
MSH5	2509866	183	32	1003104	287226	0	1	0	0	50	4	10222686	0.183633	1
TBC1D21	358897	439	26	413100	98658	0	1	0	0	50	4	11669346	0.183743	1
ASCL3	548433	243	21	207522	60750	0	1	0	0	50	8	9438768	0.183861	1
POLH	1221714	194	46	823932	236520	0	1	0	0	50	8	11201814	0.183932	1
C9orf129	439538	426	41	226314	68688	0	1	0	0	50	9	11819682	0.18394	1
C10orf27	521475	579	30	411156	117612	0	2	0	0	50	12	9207270	0.183977	1
TRIM28	2673870	276	11	960822	289170	0	3	0	0	50	9	11020050	0.184008	1
GPC2	1299015	205	52	643140	219996	0	1	0	0	50	1	9484290	0.184053	1
F5	294416	415	11	2603502	687204	0	6	1	0	44	6	9429534	0.184111	1
ACRBP	2816983	210	61	636336	175284	0	1	0	0	50	13	11630790	0.184118	1
FAM84B	203378	592	-8	347328	108054	0	1	0	0	50	6	11279412	0.184166	1
GCLC	363341	337	24	764964	194400	0	2	0	0	50	6	10455318	0.184494	1
GIN1	205281	565	14	618840	157302	0	2	0	0	50	6	8452836	0.184639	1
ZNF101	768855	418	-10	512892	131058	0	2	0	0	45	6	6965352	0.184704	1
KCND1	834590	NaN	41	723978	230526	0	2	0	0	50	6	9880704	0.184825	1
CCDC124	1366136	217	36	261144	73224	0	1	0	0	50	7	11047590	0.185877	1
ZNF512	1192074	306	43	680076	174312	0	1	0	0	50	16	13112280	0.185884	1
TOR1AIP1	470940	364	5	677646	191322	0	2	1	0	50	7	10229004	0.185941	1
AATK	1737949	243	22	1525716	505278	0	3	0	0	50	4	10967238	0.185958	1
ZNF500	706891	195	33	544482	166536	0	2	0	0	50	8	8869014	0.186018	1
KLHL26	1397040	222	33	685422	217566	0	2	0	0	50	7	10170198	0.186031	1
NAA15	389880	299	26	1057536	243486	0	1	0	0	50	5	11106882	0.186162	1
EIF2B4	1245306	182	52	635202	198774	0	1	1	0	47	9	8678826	0.186176	1
CCDC120	833689	NaN	41	731754	260658	0	2	0	0	50	6	9881514	0.186223	1
RBPJL	1005559	233	36	598752	179820	0	1	1	0	50	7	7985628	0.186227	1
CCDC144NL	463169	398	-24	259038	70470	0	1	0	0	50	7	10743192	0.18623	1
ZBTB8OS	1441027	144	28	224532	50544	0	1	0	0	50	7	9472302	0.186342	1
C20orf195	1262904	298	54	353646	114372	0	1	1	0	50	3	8558622	0.18664	1
OR13H1	81234	NaN	4	344088	105948	0	1	0	0	50	7	14229432	0.186704	1
TBC1D4	196931	480	17	1517940	414882	0	3	0	0	50	8	8736498	0.187081	1
HEG1	367509	177	50	1557144	489888	0	4	0	0	24	1	4421466	0.187185	1
TASP1	121103	796	-26	501228	137862	0	2	0	0	50	10	9681444	0.187328	1
CGB2	2070141	200	35	180630	63342	0	1	0	0	50	8	8256006	0.187375	1
C1QTNF1	592461	285	15	327726	89262	0	1	0	0	50	4	9190422	0.187569	1
ZNF268	334913	834	6	235386	50868	0	1	0	0	50	6	9063414	0.187588	1
OR2T2	112460	903	-20	360126	113724	0	1	1	0	24	8	4512024	0.188284	1
FAM91A1	483934	269	10	1003914	265032	0	4	0	0	50	14	12674232	0.188397	1
AMMECR1L	588745	248	39	360288	104814	0	1	0	0	50	4	10045296	0.188543	1
ACTB	1906749	195	34	432864	125064	0	1	0	0	50	3	10354068	0.188608	1
SLC22A11	1970283	411	54	621108	199746	0	2	0	0	50	7	8800164	0.188694	1
PARP1	805195	409	9	1208034	314604	0	2	0	0	50	5	7239942	0.188726	1
PRR4	365490	676	5	199260	57348	0	1	0	0	50	8	9034254	0.188736	1
CDHR3	337002	408	29	1034532	292248	0	1	0	0	50	5	10695240	0.188871	1
UPF2	353958	125	28	1528146	368712	0	2	0	0	50	6	10286190	0.188918	1
IGF2R	653159	460	18	2930580	794124	0	4	1	0	50	3	8291484	0.188996	1
ATMIN	231500	284	4	931824	276372	0	2	0	0	50	4	9826758	0.189068	1
PGS1	980896	209	26	634716	195858	0	2	0	0	50	8	9585378	0.189123	1
NUCB2	522189	387	19	526662	109998	0	1	0	0	50	2	10038816	0.189276	1
CAPRIN2	286973	420	-8	1320624	357048	0	3	1	0	50	9	10240182	0.189343	1
HBG2	109545	1056	-1	172044	49572	0	1	0	0	50	8	8189262	0.189473	1
PKP3	1830414	344	53	892620	295164	0	1	0	0	50	5	9306900	0.189495	1
KMO	171933	382	-17	590328	147906	0	2	0	0	50	8	9578088	0.189505	1
MYLK	284041	449	32	2228634	623700	0	4	2	0	50	14	10381608	0.189653	1
TMEM86A	616892	562	25	268272	87966	0	1	0	0	50	6	9687924	0.189981	1
AKT3	208930	954	-4	605232	143208	0	1	0	0	50	11	9180216	0.190196	1
KRTAP4-1	996799	468	-7	149688	39852	0	1	0	0	50	9	7800300	0.190288	1
IFITM5	1463610	437	24	145962	50868	0	1	0	0	50	10	8297478	0.19029	1
OGFOD1	523951	285	13	659340	156654	0	1	0	0	50	12	11480130	0.190508	1
TADA3	953772	264	43	503334	144504	0	2	0	0	50	14	12365298	0.190561	1
CARNS1	1269888	177	51	1035990	368064	0	3	0	0	50	6	9419166	0.190833	1
CITED1	370863	NaN	50	247212	78408	0	1	0	0	50	7	10136664	0.191156	1
PSG11	263820	178	-32	388476	111132	0	2	0	0	50	13	8974800	0.19118	1
CRTC2	2028800	222	34	783432	254664	0	3	1	0	50	7	8319672	0.19131	1
ANKAR	408508	452	20	1695006	441936	0	2	0	0	50	6	11283300	0.191323	1
OR5L1	4183	1091	-36	347490	107406	0	2	0	0	50	16	9504864	0.191579	1
DNAJC14	1909014	256	38	800280	236358	0	2	0	0	50	6	10597554	0.191745	1
MYO7B	528013	229	36	2478924	697086	0	4	1	0	50	2	8784774	0.191875	1
TOX3	62431	993	-53	698868	193428	0	1	0	0	50	8	8626824	0.191908	1
SLC22A2	653647	326	-9	643464	186624	0	2	0	0	50	6	8494632	0.192014	1
C15orf24	409752	384	1	280260	82782	0	1	0	0	50	5	8768898	0.192037	1
MORC1	88595	1029	-12	1200906	288684	0	3	0	0	22	4	5122602	0.192139	1
IL33	355118	432	5	330804	76950	0	1	0	0	50	3	7535754	0.192375	1
LAIR2	819283	601	-4	177876	52974	0	1	0	0	50	11	10215882	0.192698	1
NUP62CL	227679	NaN	32	224046	59292	0	1	0	0	50	7	9412038	0.192827	1
ITGB1	390742	205	-15	1056726	252072	0	1	0	0	50	3	8916156	0.193002	1
PAMR1	646177	410	0	862974	235386	0	3	0	0	26	1	4148010	0.193065	1
RFNG	3850694	197	34	377460	121176	0	1	0	0	50	3	8563644	0.193085	1
NTN4	461515	237	7	741474	193104	0	1	0	0	50	11	11508642	0.193208	1
SLC39A12	94785	360	-9	809676	222588	0	2	0	0	50	6	10637406	0.193332	1
C18orf19	161398	676	44	313470	90396	0	1	1	0	50	3	7095600	0.193479	1
CDC20	1088321	252	27	580770	168642	0	2	0	0	50	9	10095516	0.193592	1
MRPS26	835590	288	54	234252	72900	0	1	0	0	50	7	7958412	0.193622	1
GPX7	647361	355	12	215622	63342	0	1	0	0	50	10	11593368	0.193661	1
UGT8	32108	966	2	624348	175608	0	1	0	0	50	11	10570824	0.193782	1
TNFAIP3	315946	256	51	923562	245268	0	2	1	0	50	11	8903358	0.19384	1
C20orf177	73597	856	-36	433026	128790	0	2	0	0	50	12	9151218	0.193905	1
KCNIP1	52578	618	31	319626	72090	0	1	0	0	50	5	10377558	0.193927	1
TCP10L	265057	182	52	250128	72090	0	1	0	0	50	5	8108910	0.194182	1
PEX26	516479	239	27	346356	109512	0	1	0	0	50	4	9327636	0.194509	1
ZNF675	451758	1464	-69	676998	158436	0	1	0	0	50	13	12429774	0.195015	1
GRIN3B	2387949	206	26	1131246	407430	0	2	0	0	50	6	14742972	0.195189	1
SRA1	706371	319	29	272646	80676	0	1	0	0	50	7	10722780	0.195322	1
TATDN3	331599	445	22	338904	90720	0	1	0	0	50	7	13565232	0.195345	1
CCDC30	644678	461	21	951588	220644	0	3	0	0	50	7	9555732	0.195379	1
HIST1H1A	408919	685	43	238464	78408	0	1	0	0	50	10	7682040	0.195566	1
PIAS3	NaN	NaN	NaN	721872	221454	0	1	0	0	50	21	18262422	0.195679	1
TRPS1	55597	711	-10	1490238	407592	0	2	0	0	45	9	12559860	0.195786	1
MARCO	152902	553	-2	616572	174150	0	1	0	0	50	12	9372186	0.195827	1
KCNA5	160467	896	22	671166	224046	0	2	0	0	50	8	10611810	0.195855	1
C15orf61	NaN	NaN	NaN	178524	54756	0	1	0	0	50	21	18095724	0.195995	1
LIPH	953031	366	31	536868	139644	0	2	0	0	50	9	9201114	0.196209	1
COL18A1	513400	481	41	2008476	682020	0	3	0	0	14	0	2996676	0.196504	1
FAM135B	6187	989	-37	1623402	464940	0	4	0	0	50	12	10708200	0.196637	1
IL17RD	426285	332	37	864432	238788	0	2	0	0	50	4	8797896	0.196734	1
CDK18	679311	268	34	597294	168156	0	2	0	0	50	8	9407502	0.196756	1
KRTAP19-1	14979	1035	-68	100926	30780	0	1	0	0	50	12	6447438	0.19679	1
CCDC12	489602	371	43	217242	57834	0	1	0	0	50	7	8912106	0.196978	1
ZNF425	605000	242	27	877878	225828	0	3	1	0	50	9	10429722	0.197127	1
CYTIP	79169	895	18	427194	112266	0	2	0	0	50	14	10337706	0.197151	1
PIGQ	1115707	213	39	888246	270864	0	1	0	0	50	3	7722216	0.19716	1
PPP1R10	2080582	271	32	1078110	328860	0	2	0	0	50	10	9844092	0.197196	1
ZFPM1	626557	184	37	1110024	376650	0	1	0	0	50	4	9913428	0.197383	1
CTSZ	1009250	152	30	353322	99630	0	1	0	0	50	4	9347400	0.197635	1
PPP2CB	365415	346	28	364824	98820	0	1	0	0	50	4	9930762	0.197798	1
HSPB3	61471	617	14	168480	51678	0	1	0	0	50	12	10304658	0.197931	1
RNF219	58504	954	4	853578	217080	0	2	0	0	50	6	10985706	0.198094	1
HOXA7	356045	385	28	262602	76140	0	1	0	0	50	7	10334952	0.198321	1
ABTB2	769733	368	32	975888	279936	0	2	0	0	50	10	9447192	0.198322	1
TMEM225	89099	736	-8	267786	67554	0	1	0	0	50	8	11697858	0.198344	1
RIPPLY2	108781	870	-22	153738	40176	0	1	0	0	50	12	9370566	0.19854	1
ACBD5	383472	555	36	635526	154710	0	1	1	0	50	8	8637840	0.198548	1
MAPT	369065	469	19	885654	274428	0	2	1	0	50	6	11373534	0.198595	1
PNPO	1183803	203	21	308124	85536	0	1	0	0	50	5	9725832	0.198882	1
PPME1	628196	280	38	468666	121824	0	1	0	0	50	2	8452674	0.198884	1
CXorf38	467563	NaN	63	377460	101250	0	1	1	0	50	3	8507754	0.198926	1
SLC22A12	1970283	411	54	620622	206550	0	2	0	0	50	7	8800164	0.19902	1
DPY19L3	308903	531	-54	851796	228582	0	2	0	0	50	20	12638430	0.199209	1
RNF6	96737	562	25	781812	224208	0	1	0	0	50	7	8688060	0.199322	1
C5orf52	NaN	NaN	NaN	185652	52488	0	1	0	0	50	21	18093456	0.199329	1
THAP1	594393	454	34	261468	54432	0	1	1	0	13	3	2183436	0.199551	1
OR52W1	466636	728	4	342468	124578	0	1	0	0	50	5	10431990	0.199645	1
TMEM179	625253	450	20	226152	67392	0	1	0	0	50	8	9625716	0.199733	1
CCDC90B	308108	414	18	310878	76464	0	1	0	0	50	6	11160990	0.199749	1
DDX20	333198	440	25	962766	259524	0	2	0	0	50	4	9640458	0.200176	1
THTPA	1250373	553	35	258552	82134	0	1	0	0	50	8	11573442	0.200192	1
SLC1A1	228047	813	19	609930	176904	0	2	0	0	50	8	9441522	0.200272	1
PIGN	125694	442	28	1117476	295812	0	3	0	0	50	7	9358902	0.200362	1
KIF20A	1127160	314	50	1046034	288036	0	2	0	0	50	3	9061470	0.200628	1
SPINLW1	1069725	438	36	181440	40662	0	1	0	0	50	11	9567558	0.200638	1
PDE6D	979792	193	33	182574	45360	0	1	0	0	50	9	8489772	0.200759	1
DEFB125	86	430	NaN	178038	52812	0	1	0	0	50	9	8424810	0.200953	1
SOCS6	64018	264	7	606204	175284	0	2	0	0	50	10	10173276	0.201024	1
C19orf10	921603	203	35	206064	58320	0	1	0	0	50	9	9747378	0.201025	1
KCND2	49438	962	7	718956	210762	0	2	0	0	50	9	11859048	0.201085	1
KCTD10	434920	420	38	367740	102708	0	1	0	0	50	6	10039788	0.201096	1
ZNF536	106911	926	-73	1475334	429300	0	4	1	0	37	11	7698240	0.201157	1
STEAP2	132955	1140	6	579798	160380	0	2	0	0	50	8	8890560	0.201317	1
HIST1H4H	390169	544	57	113238	39366	0	1	0	0	50	11	6308280	0.201445	1
ALDH1A3	378556	374	0	600210	171072	0	2	0	0	50	7	8440848	0.201567	1
FIBIN	176115	648	-17	240084	69012	0	1	0	0	50	12	11631438	0.201581	1
PLCZ1	82407	911	-29	735156	179010	0	2	0	0	50	13	7743762	0.201647	1
SLC22A5	543074	264	63	637308	193752	0	2	0	0	50	5	7187454	0.201674	1
ASPDH	762018	517	35	334530	108702	0	1	1	0	18	5	3124008	0.201698	1
SLC38A1	752720	334	9	586440	154224	0	1	0	0	50	13	10446894	0.201729	1
OR5T1	10317	969	-43	368550	108216	0	2	1	0	15	2	2688714	0.201812	1
CST8	188567	750	-16	167832	44550	0	1	0	0	50	12	10040598	0.20187	1
BEND6	428244	271	23	337284	82620	0	1	0	0	50	5	9976932	0.201931	1
SNUPN	594867	165	39	431568	110322	0	1	0	0	50	3	9556866	0.202084	1
PMVK	1695232	224	37	225990	63180	0	1	0	0	50	9	11002392	0.202226	1
GLCCI1	179344	405	24	618678	193914	0	1	0	0	33	5	6197634	0.202272	1
FAM173B	623675	325	5	271512	78408	0	1	0	0	50	9	12745998	0.202387	1
ZNF653	1204183	265	32	704376	209304	0	1	0	0	50	7	7951122	0.202652	1
LRCH2	210224	NaN	-8	916758	239922	0	1	0	0	50	10	12381174	0.202807	1
RPL18A	1216364	212	37	208494	59292	0	1	0	0	50	7	8002314	0.202811	1
KRT38	1321356	424	-6	525366	152604	0	1	0	0	50	11	7678152	0.203022	1
ANKFN1	184382	511	-53	910440	236520	0	4	0	0	50	11	7880976	0.203117	1
CYB5R1	421206	389	30	355104	107568	0	1	0	0	50	4	9380772	0.203162	1
MMP8	530224	567	-10	559872	140940	0	2	1	0	50	7	7819578	0.20323	1
PNRC1	307937	375	29	361422	118746	0	1	0	0	50	4	9119790	0.203309	1
RAF1	408529	172	32	770310	207036	0	3	0	0	9	0	1609470	0.203395	1
NEURL	532306	170	44	637794	210276	0	1	0	0	50	8	8097084	0.203443	1
KCNJ14	1418188	209	41	481950	159084	0	1	0	0	50	5	14823000	0.203534	1
ACLY	1857838	191	33	1298430	362718	0	2	0	0	20	1	3724380	0.203814	1
FAM188A	70308	903	-2	540756	136728	0	1	0	0	50	15	9197064	0.204056	1
C14orf115	604423	384	45	771768	254664	0	1	0	0	50	8	9923148	0.204114	1
AKR1A1	873800	161	27	381510	110322	0	1	0	0	50	4	9701856	0.204725	1
STK38L	555677	345	37	569430	133812	0	1	0	0	50	2	9695862	0.205129	1
BMPR2	369483	417	30	1202040	336150	0	3	1	0	50	6	10483668	0.205307	1
VPS54	352987	407	20	1170612	298080	0	1	0	0	50	4	10697346	0.205409	1
ALPL	547986	297	42	617220	167670	0	1	0	0	50	8	7925040	0.205483	1
ETV1	46434	989	-16	605070	145800	0	2	0	0	50	9	9897714	0.205603	1
TSN	227057	517	22	268272	75330	0	1	0	0	50	7	9948258	0.20584	1
HSF2BP	878395	518	73	395766	106272	0	1	0	0	50	4	9992160	0.206033	1
ANP32A	437749	562	32	304884	71280	0	1	0	0	50	6	8265402	0.206184	1
CHORDC1	132433	1152	-21	408726	96228	0	1	0	0	50	4	10305630	0.206278	1
ADAMTSL1	313133	527	-18	2032128	593730	0	6	2	0	50	11	11654604	0.206305	1
ZWINT	65824	1191	-19	333072	88776	0	1	0	0	50	5	10088550	0.206315	1
TREX1	1480689	223	45	396576	143856	0	1	0	0	50	4	10287486	0.206463	1
FAM125A	899127	211	26	317844	98172	0	1	0	0	50	4	8239968	0.206588	1
ZSCAN1	1187584	694	-42	460242	141912	0	1	0	0	50	2	7951608	0.206642	1
DHX9	673873	517	23	1497204	408402	0	2	1	0	50	8	10398132	0.206677	1
TGM3	555761	399	27	811782	224370	0	2	0	0	50	6	10023750	0.206719	1
ARL5A	269131	610	15	218052	54108	0	1	0	0	50	9	9808128	0.206804	1
RS1	65885	NaN	26	269406	69336	0	1	0	0	50	6	9001530	0.206805	1
IQCF1	1013177	370	39	239760	68364	0	1	0	0	50	7	8992944	0.207012	1
FXYD3	745516	357	-9	243486	65610	0	1	0	0	50	6	8125920	0.207024	1
SNX24	154483	532	18	207036	52488	0	1	0	0	50	9	9810720	0.207156	1
TTC33	211936	496	-11	309744	81000	0	1	0	0	50	5	9331038	0.207321	1
PPP1R7	1363901	233	35	433998	110808	0	1	0	0	50	4	10870038	0.20751	1
KLF10	528975	178	42	549504	160056	0	2	0	0	50	8	8269776	0.207527	1
GPR1	332753	487	25	405810	115182	0	1	0	0	50	4	10000260	0.207633	1
CLSTN3	1872466	224	33	1110996	317358	0	1	0	0	50	6	10825164	0.208013	1
SLC13A2	1517567	225	24	732402	225990	0	2	0	0	50	5	8010576	0.208085	1
HOOK1	59567	747	-3	896184	207522	0	1	0	0	50	10	11439792	0.208334	1
MRPL28	1549307	207	37	298566	85860	0	1	0	0	50	8	11811258	0.208347	1
PXMP4	714390	161	56	244620	71766	0	1	0	0	50	7	9106020	0.208406	1
SP140	504037	626	37	1113102	258876	0	2	0	0	11	0	2286630	0.208601	1
CYP2C19	254705	831	-17	576882	154062	0	2	0	0	50	9	9103104	0.208604	1
EIF2C3	966499	282	25	1009098	281232	0	1	0	0	50	6	10442844	0.208893	1
SLCO3A1	70107	867	-8	841752	253692	0	3	1	0	50	13	12862962	0.209236	1
MND1	202295	238	27	258552	56376	0	1	0	0	50	6	8524926	0.209258	1
ASAP2	661229	340	34	1201878	318816	0	2	0	0	50	5	13167522	0.209323	1
POLR3F	414549	436	23	384588	93150	0	1	0	0	50	5	11452266	0.209462	1
ZNF468	557083	1008	-39	617544	150822	0	2	0	0	50	9	10049508	0.209664	1
GZMM	1647685	255	-8	287226	97686	0	1	0	0	50	5	8539992	0.209755	1
EXOC1	579538	452	12	1074546	265356	0	2	0	0	50	3	8940294	0.209834	1
ANKRD28	345831	435	29	1247724	341496	0	2	0	0	50	4	12008736	0.209858	1
STARD3	1224964	213	33	546912	136890	0	1	0	0	50	9	8351262	0.209864	1
FARSB	267637	308	18	704214	188082	0	1	0	0	50	8	9362142	0.210091	1
LRRC34	404285	689	13	558900	149202	0	2	0	0	50	10	9705420	0.210246	1
TMEM216	1394229	286	57	175122	51840	0	1	0	0	50	9	8155080	0.210376	1
GALNT14	94332	876	6	658044	175446	0	2	0	0	50	7	8861562	0.210571	1
STARD6	99256	451	41	265032	66420	0	1	0	0	50	9	11894202	0.210639	1
LEUTX	NaN	NaN	NaN	193752	55566	0	1	0	0	50	21	18096534	0.210819	1
MYST2	1129239	238	27	730134	189378	0	2	0	0	50	7	9876816	0.211085	1
PRRT1	2119974	392	28	331452	121986	0	1	0	0	50	6	10818522	0.211149	1
ZEB2	56402	621	16	1423170	365796	0	2	0	0	50	7	9284058	0.211302	1
FASN	3850694	197	34	2844720	899424	0	5	0	0	16	0	2922480	0.211453	1
TRAF3	719158	178	49	678132	170910	0	1	0	0	50	6	6867180	0.211612	1
LMO4	279257	521	-10	197154	52650	0	1	0	0	50	12	11169900	0.211874	1
DDX41	1120311	347	41	738882	201528	0	2	1	0	50	6	9070866	0.212002	1
RHBDF2	1202221	197	29	995328	287226	0	3	1	0	50	7	9441684	0.212279	1
BLM	997342	176	45	1675890	432378	0	5	0	0	50	9	10880730	0.21239	1
BRD1	644644	276	-18	1216782	348624	0	1	0	0	27	0	5576526	0.212562	1
C9orf57	NaN	NaN	NaN	195534	49410	0	1	0	0	50	21	18090378	0.212577	1
PFKL	1153513	308	65	911412	269082	0	2	0	0	50	4	8658252	0.212604	1
XKR4	93897	925	-13	734184	219834	0	2	1	0	50	8	10695726	0.213144	1
RYR3	140241	806	-13	5775624	1527498	0	10	1	0	32	3	6718302	0.213181	1
ZNRF3	693562	326	-13	946566	288360	0	2	0	0	50	4	8933652	0.21328	1
PABPC5	8224	NaN	-28	433674	124740	0	2	0	0	50	18	11471058	0.21331	1
PTPRA	807310	396	46	957906	253692	0	3	0	0	50	12	12464928	0.213507	1
FCHO2	449417	440	18	977994	253044	0	1	0	0	50	3	7563942	0.213534	1
TUBB8	9202	NaN	NaN	512082	142560	0	2	0	0	50	12	10147194	0.213712	1
CNGB3	191008	1171	2	962442	252558	0	2	0	0	35	1	5475438	0.21372	1
PDE6A	1032925	135	43	1042794	253368	0	2	0	0	50	5	11216394	0.213803	1
GRHL2	424003	399	36	757350	184518	0	2	0	0	50	7	9709308	0.213918	1
GDF5	1521661	167	53	553716	180144	0	1	0	0	50	11	8894286	0.214002	1
MRPS11	212296	630	4	225342	68688	0	1	0	0	50	9	9748512	0.214061	1
SOX4	117516	676	1	515484	177066	0	2	1	0	50	10	8908866	0.214173	1
ZNF510	327128	491	14	815508	189540	0	1	0	0	50	6	8642862	0.214224	1
CACNA2D1	58044	982	4	1340388	325620	0	2	0	0	50	10	11244744	0.21458	1
ABTB1	679358	336	45	558738	162000	0	1	0	0	50	15	9579546	0.214657	1
C6orf70	233648	447	3	808056	216918	0	2	0	0	50	7	10705770	0.214675	1
C1orf103	406255	715	28	878364	250128	0	2	0	0	26	1	4974696	0.214704	1
NOSTRIN	169372	724	12	693198	162162	0	2	0	0	50	8	10153512	0.214945	1
SLC1A7	509533	391	21	636822	200556	0	1	0	0	50	2	10512666	0.215151	1
RAD51C	524193	222	17	442098	125064	0	1	0	0	50	3	8875170	0.215293	1
MFAP4	630769	332	11	301968	81972	0	1	0	0	50	9	12972798	0.215395	1
CAPRIN1	770116	279	28	854064	223884	0	3	0	0	50	12	10899684	0.215502	1
RAP2B	59808	598	-2	207522	60750	0	1	0	0	50	10	10255248	0.215595	1
PAEP	327501	539	37	220482	57024	0	1	0	0	50	8	8588754	0.216085	1
BDH1	685310	263	39	398844	114372	0	1	0	0	50	5	11463930	0.216137	1
CTAGE1	162557	417	-9	856332	231336	0	1	0	0	50	7	9470844	0.216165	1
PHF21B	350834	525	-5	610902	190026	0	2	0	0	50	10	10396674	0.216306	1
APCS	492825	646	-4	255960	73548	0	1	0	0	50	11	9757584	0.216576	1
ZNF549	459366	828	-31	736938	182574	0	1	0	0	50	7	7487964	0.216578	1
TAF6	1299015	205	52	772416	244296	0	1	0	0	50	1	9484290	0.216723	1
ATF7IP2	199617	364	9	806112	209142	0	1	0	0	50	9	9542286	0.216743	1
EFNA3	1696720	214	44	276372	80838	0	1	0	0	50	8	10916046	0.216916	1
IMMP2L	67842	871	-7	209304	57024	0	1	0	0	50	14	13186800	0.216921	1
DKKL1	2183690	309	30	276858	86184	0	1	0	0	50	7	9830646	0.217306	1
GABRA5	22005	1346	-56	545616	146934	0	2	0	0	50	14	12048102	0.217362	1
GFAP	1101543	172	28	547236	162324	0	2	0	0	50	8	7870284	0.217405	1
IL16	251183	742	17	1513890	465102	0	2	0	0	50	7	10135206	0.217526	1
NAA20	225789	502	12	225180	54756	0	1	0	0	50	9	9745596	0.217527	1
HELT	335039	582	29	366444	117126	0	1	0	0	50	5	10455642	0.217543	1
TBX3	32369	548	-30	837216	261144	0	2	0	0	50	15	8963298	0.217581	1
SPTA1	177547	940	1	2898018	729486	0	6	1	0	27	4	6592266	0.217701	1
GEMIN6	843382	297	31	198450	51354	0	1	0	0	50	10	9349020	0.217832	1
C1orf65	368078	600	-10	700650	209628	0	1	0	0	50	6	6404346	0.217865	1
TBX15	87793	927	-4	574290	162000	0	2	0	0	50	10	9726966	0.217867	1
PSMC5	1446139	380	27	481788	134946	0	2	0	0	50	10	8530434	0.217958	1
PHKA2	182760	NaN	35	1462536	401760	0	4	1	0	50	8	9306900	0.218142	1
SEMA5B	504904	328	34	1327428	394956	0	3	0	0	32	2	5814828	0.218305	1
ZFP37	492947	575	-4	746982	179820	0	2	0	0	50	7	9744948	0.21846	1
C3orf23	319459	418	27	619974	148392	0	1	0	0	50	2	9829512	0.218515	1
F11R	777836	441	19	354132	100764	0	1	0	0	50	5	10041408	0.218732	1
HTR1A	3636	1003	-20	464940	151308	0	1	0	0	15	3	3529656	0.218862	1
BRS3	374989	NaN	23	452142	135918	0	1	0	0	50	4	10491282	0.218972	1
RPL9	648710	177	43	234414	60102	0	1	0	0	50	9	10064736	0.219054	1
CCDC54	101063	575	-12	380538	100116	0	1	0	0	50	6	11906352	0.219184	1
NF2	734742	149	38	738234	182250	0	1	0	0	50	10	9971910	0.219402	1
A2ML1	300254	407	12	1717200	472716	0	2	2	0	50	7	10977768	0.219482	1
C14orf1	639204	372	46	165240	48114	0	1	0	0	50	13	10001232	0.21949	1
GPR85	110068	954	-8	415044	125874	0	1	0	0	50	4	9749160	0.219643	1
SLC30A1	380154	236	22	568620	173988	0	1	0	0	50	2	9161910	0.219797	1
FKBP7	170323	555	37	266976	63990	0	1	0	0	50	6	8322426	0.219904	1
BAT2L1	651666	272	34	2559924	750708	0	5	0	0	7	0	2049948	0.220062	1
MCTS1	388105	NaN	7	228582	54270	0	1	0	0	50	9	9101808	0.220067	1
C17orf64	436889	204	1	281880	74358	0	1	0	0	50	6	8768898	0.220299	1
C1orf124	377235	569	2	584820	153414	0	2	0	0	50	12	11129238	0.220311	1
LIMS1	363356	408	30	399978	92826	0	1	0	0	50	5	10892394	0.220488	1
CD180	36320	392	14	760590	208494	0	1	0	0	50	9	9096138	0.221088	1
OR10A5	427462	681	8	355914	107730	0	1	0	0	50	4	8294724	0.221163	1
IL29	1838894	286	29	226800	75006	0	1	0	0	50	10	10494684	0.221296	1
ZNF385B	65074	927	-3	558576	158274	0	2	0	0	50	11	9961380	0.221509	1
FAM131A	1447013	268	44	413262	131544	0	1	0	0	50	6	12774834	0.221533	1
FAM108A1	2226995	214	26	406458	129114	0	1	0	0	50	5	11007252	0.221568	1
C20orf3	545344	676	-29	480168	144342	0	2	0	0	50	11	8760312	0.221604	1
TXNDC3	103411	646	13	721548	168318	0	1	0	0	50	8	8216802	0.221629	1
ZDHHC3	472994	290	36	488268	125550	0	1	0	0	50	3	8970264	0.221752	1
MICB	2514366	220	34	442908	126684	0	1	0	0	50	4	10596906	0.221777	1
OSTM1	303865	459	38	390096	109026	0	1	0	0	50	3	7569936	0.221835	1
OTX2	191584	1012	-7	338580	99792	0	1	1	0	16	7	3397626	0.221913	1
LXN	196969	940	-12	270054	64800	0	1	0	0	50	7	9362952	0.22192	1
SLAMF9	812025	365	13	345708	82944	0	1	0	0	50	4	7897500	0.222017	1
ACTN2	427180	682	-10	1071630	272160	0	2	0	0	50	7	6777432	0.222745	1
HIST1H2BC	398813	636	53	142236	43902	0	1	0	0	50	9	6206058	0.222826	1
FKTN	215248	637	-5	552744	138348	0	2	0	0	50	13	11279736	0.222913	1
EML1	528390	354	10	989334	271836	0	2	0	0	50	7	12351042	0.223062	1
ANKRD6	403943	609	43	839646	241704	0	1	0	0	34	4	6998238	0.223217	1
TRDN	23697	1090	-16	945270	197802	0	2	0	0	50	5	9788850	0.22336	1
FIGLA	596622	629	24	254664	75816	0	1	0	0	50	6	7657416	0.223588	1
KDELC1	195534	475	24	599400	151470	0	2	0	0	50	7	7722054	0.223603	1
KRT73	1441383	464	29	624024	181278	0	2	0	0	50	9	9552492	0.223649	1
MYEOV	558031	443	37	341982	119718	0	1	0	0	50	7	11751642	0.223659	1
PPP3R2	112839	1008	-11	202338	52326	0	1	0	0	50	11	10015812	0.22366	1
DUSP26	91655	610	11	239436	75492	0	1	0	0	50	9	9852678	0.22373	1
DHFRL1	85529	1378	-18	218700	57348	0	1	0	0	50	9	9165960	0.223751	1
SHE	1711793	337	45	565218	168642	0	2	0	0	50	10	9418680	0.223797	1
FMR1NB	96935	NaN	-13	306504	77436	0	1	0	0	50	7	9723240	0.223812	1
CDH10	30232	737	-29	914004	255798	0	3	0	0	50	9	8746704	0.224371	1
ANKRD34C	NaN	NaN	NaN	598428	185004	0	2	0	0	50	21	18225972	0.224402	1
KRT28	836683	269	-10	538974	153576	0	2	0	0	50	8	7525386	0.224447	1
HCCS	80480	NaN	30	323514	80352	0	1	0	0	50	6	10177650	0.224516	1
EMR3	1036916	384	31	772740	208494	0	3	0	0	50	8	7366950	0.22473	1
SAMD10	1152034	208	48	232308	71442	0	1	0	0	50	10	10942776	0.224882	1
METTL9	479469	466	40	372762	100116	0	1	0	0	50	6	11308896	0.225217	1
ATXN1	109777	623	30	901530	290142	0	2	1	0	50	6	10406394	0.225275	1
EIF3L	1385064	203	66	683316	164754	0	1	0	0	50	10	8429184	0.225909	1
PPP2R2B	309460	509	1	588384	142560	0	1	0	0	50	3	11486286	0.225931	1
HRASLS	141065	851	-4	197316	53946	0	1	0	0	50	11	8636868	0.226215	1
MRPL23	827096	481	53	182736	50544	0	1	0	0	50	14	11395728	0.22629	1
NUP62	1679101	205	45	568458	196020	0	2	1	0	25	4	5089554	0.226363	1
TSSK1B	267968	620	13	416826	119718	0	1	0	0	50	6	12990618	0.226385	1
ANKRD7	72287	922	-13	306990	76464	0	1	0	0	50	8	11550114	0.226394	1
SPTB	584151	204	38	2743146	752166	0	5	1	0	50	4	8346726	0.226521	1
MAGEA1	607570	NaN	18	347166	106758	0	1	0	0	50	5	9167904	0.226524	1
ENAH	744021	207	2	694008	196344	0	2	0	0	50	8	9630090	0.226552	1
ANP32E	1207965	197	39	329994	73872	0	1	0	0	50	6	9423540	0.226558	1
STK24	513130	468	59	542862	145314	0	2	0	0	50	8	7571070	0.226702	1
HIST1H2BD	398813	636	53	145152	43902	0	1	0	0	50	9	6206058	0.226829	1
UGT2A2	19584	1065	-8	615924	165078	0	1	0	0	50	15	10534050	0.226943	1
ASCC2	849790	182	33	901854	240246	0	1	0	0	50	10	11380662	0.227105	1
ZNF7	1454261	384	20	806922	203472	0	2	0	0	50	14	10619910	0.227111	1
SAP25	NaN	NaN	NaN	224856	75492	0	1	0	0	50	21	18116460	0.22716	1
FAM98C	1467279	253	0	391068	133812	0	1	0	0	50	4	9095490	0.227363	1
RAPSN	1022438	245	47	481302	134460	0	1	0	0	50	4	10868418	0.22738	1
MS4A10	744779	621	23	314442	89910	0	1	0	0	50	7	10601766	0.227424	1
TMEM181	646528	306	46	720414	205416	0	1	0	0	50	10	9641916	0.227447	1
GAPDH	2764720	179	42	393660	111780	0	1	0	0	50	6	11802510	0.227561	1
USP15	239150	456	-26	1152630	276696	0	3	0	0	50	8	10985382	0.227575	1
CLTC	1083057	398	23	1983204	520668	0	2	0	0	20	1	5288166	0.227589	1
OR51B4	100115	1056	1	348138	104814	0	1	0	0	50	4	8086716	0.227613	1
RAB31	441061	148	43	237978	59454	0	1	0	0	50	7	8001828	0.227962	1
GRAMD2	1132082	352	26	427842	112104	0	1	0	0	50	4	9476676	0.228108	1
MCAT	624112	241	48	442908	133974	0	1	0	0	50	4	10255896	0.228239	1
TMEM87A	595635	394	35	692874	176094	0	2	0	0	50	8	9529488	0.228242	1
HMGB2	249666	413	23	256446	57510	0	1	0	0	50	8	8395650	0.22835	1
BCL9	NaN	NaN	NaN	1593918	498312	0	3	1	0	50	22	18539280	0.228418	1
OR7A17	963401	546	14	343926	107082	0	1	0	0	50	5	8993430	0.228499	1
CYGB	1016866	197	24	220806	63504	0	1	0	0	50	9	9357768	0.228584	1
HNRNPC	730651	357	37	365796	95418	0	1	0	0	50	6	10718892	0.228702	1
WDR70	302307	592	15	791046	198936	0	1	0	0	27	4	6460236	0.228993	1
UGT1A10	NaN	NaN	NaN	613008	169938	0	2	0	0	50	21	18210906	0.229001	1
NTF4	2070141	200	35	226476	83106	0	1	0	0	50	8	8256006	0.229074	1
STON1-GTF2A1L	75084	934	-3	1373112	372114	0	2	0	0	16	1	3641598	0.229218	1
SMTN	726734	202	32	1100142	348624	0	3	1	0	50	5	8034876	0.22936	1
ZNF329	1308496	619	-64	629694	162486	0	2	0	0	50	15	14210640	0.229386	1
G3BP2	485383	451	31	569430	156168	0	2	0	0	50	12	10172466	0.229537	1
WSB1	147758	292	-21	498312	132516	0	2	0	0	39	10	8119116	0.229576	1
KIAA1267	388537	357	21	1258092	380700	0	1	0	0	50	5	10207944	0.229675	1
EFEMP2	3779084	287	42	525528	141264	0	1	0	0	50	5	8983710	0.229761	1
VBP1	371405	NaN	-13	242190	57186	0	1	0	0	50	9	9665568	0.229814	1
CDK17	248700	405	26	647676	164916	0	1	0	0	39	1	7426566	0.230151	1
SYPL1	327117	336	29	303912	86832	0	1	0	0	50	7	10098270	0.230342	1
WBSCR27	1099366	208	37	278154	90234	0	1	0	0	50	5	7429320	0.23053	1
ABCB4	225315	837	8	1509354	420552	0	4	0	0	34	7	6316542	0.230682	1
LRRTM1	10982	1577	-18	583686	180792	0	2	1	0	34	5	5876226	0.230721	1
PARG	340607	454	28	1164294	293220	0	1	0	0	50	6	10177488	0.230848	1
ANKH	503265	410	8	572994	167184	0	1	0	0	50	5	11842848	0.230896	1
GABRG2	8332	869	-14	610578	161190	0	2	0	0	50	15	13596660	0.230955	1
MYO6	362445	482	17	1565730	375354	0	3	0	0	41	3	8902062	0.23114	1
RTP3	289420	565	32	273456	70146	0	1	0	0	50	9	11039652	0.231218	1
TM9SF4	1055549	262	36	768852	201690	0	1	0	0	50	8	7674102	0.231749	1
ZNF701	546511	1005	-53	624672	158760	0	2	0	0	50	9	8897688	0.231847	1
DDX51	608356	528	26	756702	243972	0	2	0	0	50	8	10279224	0.23185	1
ZNF569	234564	939	-52	821664	187758	0	1	0	0	50	6	7980606	0.232281	1
WIZ	524410	481	33	874476	298242	0	1	0	0	43	8	9806994	0.232564	1
TEX11	615286	NaN	4	1174824	274428	0	2	1	0	50	5	11108016	0.232683	1
DHRS4L2	984811	442	23	269244	84078	0	1	0	0	50	10	11753586	0.232884	1
GRIK4	298412	678	31	1112454	317844	0	2	0	0	36	6	6101730	0.232974	1
C12orf71	489310	328	23	310230	86346	0	1	0	0	50	6	9042678	0.233246	1
MAPK6	583597	153	23	846936	213516	0	1	0	0	37	4	6364332	0.233283	1
MYLK2	1015946	241	37	699192	194562	0	2	0	0	50	6	7818606	0.233466	1
FOSL2	465927	197	30	364662	117936	0	1	0	0	50	6	9934812	0.233707	1
SIRT7	3798594	211	19	460080	143046	0	1	0	0	50	3	8408286	0.233804	1
TMCO4	668417	220	29	725760	225342	0	2	1	0	50	6	8112636	0.23384	1
ESYT3	201756	408	19	1031292	304722	0	2	1	0	50	3	7772436	0.233891	1
CLIC5	62331	701	13	506250	134298	0	2	0	0	50	12	9371214	0.234024	1
GOLGA6B	1113552	419	37	799308	204768	0	1	1	0	50	7	7479702	0.234063	1
CPNE5	844979	244	43	714582	191322	0	1	0	0	50	13	10524978	0.23408	1
TFDP3	76255	NaN	28	464292	128628	0	1	0	0	50	7	12461040	0.234088	1
OR51Q1	99042	1030	1	354618	110970	0	1	0	0	50	5	9018864	0.234109	1
C15orf17	764533	195	46	225828	72090	0	1	0	0	50	10	9796464	0.234163	1
TMEM132D	32086	969	-33	1257768	361584	0	2	1	0	50	11	10663974	0.234166	1
XPC	308100	258	33	694656	195696	0	3	1	0	50	8	7760610	0.234238	1
C17orf82	292199	414	-9	265356	102060	0	1	0	0	50	9	10355688	0.234347	1
TMEM189-UBE2V1	571130	136	58	433836	120690	0	1	0	0	50	3	8119602	0.234411	1
DDOST	631461	208	35	532008	153738	0	1	0	0	50	3	9950364	0.234545	1
GLIPR1L2	313411	606	-22	298890	78246	0	1	0	0	50	8	10795356	0.234627	1
RAB39B	371405	NaN	-13	243486	70470	0	1	0	0	50	9	9665568	0.234647	1
VIT	577288	323	-8	857466	243324	0	1	0	0	50	8	9430020	0.234679	1
PKP1	758588	193	23	876582	241218	0	1	0	0	50	9	10389060	0.235128	1
NDC80	374218	390	0	784404	185166	0	2	1	0	50	6	8721918	0.235279	1
OSMR	193286	381	-10	1178226	301158	0	2	1	0	50	10	9515880	0.235285	1
DDX50	897697	246	45	865890	237330	0	1	0	0	50	10	10973880	0.235485	1
APOD	794351	315	38	223398	61398	0	1	0	0	50	11	10422594	0.235561	1
MAP4K4	325378	593	24	1576260	422658	0	3	1	0	50	6	12722832	0.235947	1
FAR1	171781	639	-7	613818	159894	0	2	0	0	50	13	11636784	0.236113	1
SIM1	103376	626	0	888894	248832	0	1	1	0	50	9	9878274	0.236233	1
SHISA3	197282	646	24	265356	85050	0	1	0	0	50	8	8875494	0.236282	1
TGS1	324398	409	17	1021248	247212	0	1	1	0	50	7	10610514	0.236317	1
TRAPPC5	688482	384	31	208170	70308	0	1	0	0	50	15	10306764	0.236348	1
RTN1	298900	639	-2	902178	277830	0	1	0	0	50	7	8206110	0.236501	1
WDSUB1	386986	265	29	565218	149688	0	1	0	0	50	4	12009708	0.236557	1
DDO	248863	469	20	421038	127170	0	1	0	0	50	5	10399914	0.236712	1
KY	221323	459	13	781326	204282	0	1	0	0	50	10	9243558	0.236765	1
GPRASP2	123687	NaN	23	956124	267138	0	3	1	0	50	6	7229898	0.237095	1
CRB1	212549	428	-23	1643328	429462	0	4	0	0	50	9	11857266	0.237314	1
KRTAP9-2	996799	468	-7	202824	53298	0	1	0	0	50	9	7800300	0.237363	1
C17orf81	1782958	316	21	410022	117774	0	1	0	0	50	3	7563294	0.237395	1
KCNE2	410767	518	61	145962	36774	0	1	0	0	50	10	6226470	0.237621	1
CIB3	761374	298	42	228258	56538	0	1	0	0	50	11	8555706	0.237688	1
SEMA4C	822597	392	46	946566	296622	0	2	1	0	50	8	12585294	0.237784	1
PRICKLE2	163412	502	3	980910	264708	0	1	0	0	50	6	8207730	0.237839	1
RPL26	772200	257	20	173988	45684	0	1	0	0	50	11	7872714	0.237947	1
CALM2	811122	132	35	187434	40986	0	1	0	0	50	11	8960544	0.23808	1
C9orf5	337902	387	13	1006830	310230	0	1	1	0	50	9	10417248	0.238158	1
LEPREL1	165372	399	3	827982	232956	0	1	0	0	50	8	8447166	0.238556	1
ZNF341	718430	161	58	978318	286254	0	1	0	0	50	6	8542584	0.238568	1
PLA2G4D	680403	360	46	950616	281394	0	2	0	0	50	14	9686142	0.238576	1
NAT9	983414	484	17	250938	63990	0	1	0	0	50	8	8887320	0.238667	1
RRAD	942986	142	34	348624	111618	0	1	0	0	50	7	9802782	0.238679	1
PSG4	310387	125	-33	485028	138024	0	2	0	0	50	13	9401832	0.238714	1
LARP4	855863	125	41	858438	228744	0	1	0	0	50	12	11197602	0.239087	1
PDS5A	606929	175	42	1612386	415692	0	2	0	0	50	7	9801000	0.239353	1
TMEM212	NaN	NaN	NaN	224370	68688	0	1	0	0	50	21	18109656	0.239635	1
CHMP6	1660463	211	27	246240	62856	0	1	0	0	50	10	10206486	0.239695	1
VWC2L	52906	1018	-1	266328	64638	0	1	0	0	50	9	10297368	0.240092	1
ZNF763	719617	678	-1	475146	110970	0	1	0	0	50	17	10244070	0.240112	1
DIRAS2	94332	706	13	231984	61560	0	1	0	0	50	11	9011574	0.240351	1
PTPDC1	449197	349	25	963414	272484	0	3	1	0	50	6	7497198	0.240359	1
NOP16	576954	347	45	212868	55404	0	1	0	0	50	11	9517338	0.24044	1
SIRT1	321700	296	-2	866214	241866	0	2	0	0	50	7	10489014	0.24045	1
TPT1	680643	296	78	214650	48276	0	1	0	0	50	11	9779940	0.240473	1
NDUFB10	1747301	183	46	211086	47952	0	1	0	0	50	10	8708634	0.240669	1
ACRC	848605	NaN	39	833166	199098	0	1	0	0	50	5	7024644	0.240746	1
ADAM19	261911	1079	45	1082160	301482	0	4	0	0	14	1	2636388	0.240931	1
GK	82798	NaN	34	681048	174312	0	2	1	0	50	8	8922150	0.241058	1
PTPN18	369510	593	29	540918	159408	0	1	0	0	50	3	9544554	0.241065	1
NLRP5	631041	561	-72	1381536	396738	0	4	0	0	9	10	6832836	0.241169	1
CA2	100997	1460	-18	310392	81810	0	1	0	0	50	9	9133074	0.241218	1
FMR1	96476	NaN	-6	792828	161190	0	2	0	0	50	8	10393920	0.241371	1
TP53I13	760947	353	26	433998	153090	0	1	0	0	50	5	10983762	0.241607	1
GLIPR1L1	112974	692	-33	280260	69660	0	1	0	0	50	10	11724750	0.241678	1
SLC9A8	649593	165	52	687528	190188	0	2	1	0	50	6	7424136	0.241679	1
FOXD3	146780	565	-4	514836	183546	0	2	0	0	50	13	9869850	0.242445	1
C1orf101	716278	590	1	1136430	293382	0	2	0	0	50	11	11196468	0.242464	1
CACNA1B	286606	675	29	2701836	797364	0	5	1	0	50	6	10628982	0.242527	1
FLJ46321	37702	928	-45	1780218	526824	0	7	0	0	28	3	3519450	0.242531	1
UHRF2	251045	431	23	944622	255312	0	1	0	0	34	1	4720356	0.242615	1
TANC1	311739	405	27	2147958	617868	0	2	0	0	50	5	10848168	0.242653	1
CNNM2	711862	233	38	1005048	305208	0	2	0	0	50	6	10866150	0.242739	1
PVRL3	79394	878	-15	629532	182088	0	2	0	0	50	13	12066084	0.242888	1
MAP2K5	449735	377	31	553878	141588	0	1	0	0	50	2	7779888	0.242928	1
SNRNP48	825677	209	14	414234	98010	0	1	0	0	50	5	9919260	0.243183	1
MB	936853	205	-13	184842	47952	0	1	0	0	50	11	8142930	0.24354	1
BRMS1L	188271	400	10	400464	89424	0	1	0	0	50	5	10037034	0.243659	1
CHMP5	856503	167	38	269730	64638	0	1	0	0	50	8	9657468	0.243675	1
HPCAL1	732179	270	44	230850	57834	0	1	0	0	50	10	9558324	0.243865	1
OR4C6	1295	1091	-20	348300	102708	0	1	0	0	50	5	8720136	0.243884	1
ANKRD40	1585602	196	18	421686	124092	0	1	0	0	50	6	11051640	0.244181	1
GPR160	396829	426	27	392850	103356	0	1	0	0	50	6	10415142	0.244279	1
OLFML2B	407279	388	15	853092	255474	0	2	0	0	50	5	8040060	0.244416	1
CNR1	172187	799	37	533790	157788	0	2	0	0	50	12	9370404	0.244492	1
OR5A1	430021	507	-1	350568	110160	0	1	0	0	50	8	9665892	0.24471	1
CD99	NaN	NaN	NaN	229878	58806	0	1	0	0	50	21	18099774	0.244856	1
CACNB2	74282	408	4	895374	241380	0	1	0	0	50	8	9367326	0.245094	1
RNASEL	597206	812	-3	856656	234900	0	1	0	0	50	11	10215720	0.245294	1
COMMD2	449009	263	21	236844	63504	0	1	0	0	50	9	8929926	0.245391	1
AMPD3	777397	378	27	923076	247698	0	2	0	0	50	8	11913966	0.245406	1
RBM19	198554	673	11	1143072	304722	0	3	1	0	50	7	9172116	0.245703	1
PCYT2	3798594	211	19	487134	133002	0	1	0	0	50	3	8408286	0.245712	1
BCAP31	1716845	NaN	44	367416	104004	0	1	0	0	50	5	8693244	0.245731	1
ZNF358	609287	308	36	621756	210762	0	1	0	0	50	3	10721808	0.245906	1
HIST1H2BI	390169	544	57	142074	44064	0	1	0	0	50	11	6308280	0.245913	1
FOXL2	345888	340	21	410346	139320	0	1	0	0	50	5	9854298	0.246087	1
INVS	246802	735	19	1240758	344574	0	1	0	0	50	6	10379016	0.24613	1
C2orf61	738157	206	39	299538	82458	0	1	0	0	50	7	9049158	0.246413	1
AASDH	639545	594	5	1278666	350892	0	3	0	0	50	9	12012462	0.246786	1
NCEH1	314731	235	20	510948	151470	0	1	0	0	50	4	10332684	0.246934	1
OR2AE1	1535089	438	36	362880	109512	0	1	0	0	50	6	9891234	0.247237	1
CPNE4	238347	974	8	670680	171558	0	1	0	0	50	14	9651798	0.247337	1
CORO2B	396006	603	25	567324	156330	0	1	0	0	50	4	11973096	0.24743	1
DHCR24	465622	249	27	601992	167346	0	1	0	0	50	2	8277876	0.247444	1
C1orf26	333911	535	-7	1085400	263250	0	3	2	0	45	6	7461558	0.247448	1
FLRT3	NaN	NaN	NaN	733860	215784	0	1	0	0	50	21	18256752	0.247471	1
RBM4B	1432488	187	46	410346	120366	0	1	0	0	50	6	11169576	0.247533	1
BZW1	620967	155	38	434160	103356	0	1	1	0	50	4	9156726	0.247567	1
KCTD14	556958	209	38	291762	84402	0	1	0	0	50	7	8909676	0.247896	1
TSPAN4	1799017	232	51	279774	82296	0	1	0	0	50	7	8538534	0.24802	1
OFD1	135235	NaN	48	1219860	299862	0	1	0	0	50	5	9075564	0.248075	1
ATP11A	585697	416	45	1446984	387180	0	3	0	0	50	7	11760552	0.248249	1
TPTE2	288628	778	-16	643626	157788	0	1	1	0	50	9	7200090	0.248359	1
MRPL32	163131	744	-6	218214	62208	0	1	0	0	50	10	8845038	0.248387	1
PTDSS1	219234	671	13	572508	142884	0	2	1	0	40	7	6286410	0.248525	1
FAM108C1	334777	313	7	369846	115182	0	1	0	0	50	7	11246040	0.248812	1
HLA-DOA	1276842	431	40	286416	88290	0	1	0	0	50	8	9655524	0.249095	1
PLSCR5	124275	768	-20	323190	86994	0	1	0	0	50	7	9812178	0.249138	1
IFI30	1249693	226	42	293706	84888	0	1	0	0	50	9	10867932	0.24941	1
FASLG	116331	506	7	322380	94608	0	1	0	0	50	7	9768114	0.249566	1
ALDH1L1	203027	610	30	1057698	301644	0	2	0	0	50	4	8724834	0.249685	1
PPARG	372685	222	25	595188	155196	0	1	0	0	50	4	10353744	0.249798	1
CARD8	1052191	391	32	639252	167508	0	1	0	0	50	9	7218396	0.249804	1
MTO1	720190	139	29	878202	252234	0	1	0	0	34	5	6837696	0.249983	1
SNX25	295066	528	30	1014930	246240	0	1	0	0	50	9	10562562	0.250122	1
SLC44A1	265154	490	0	773388	215136	0	1	0	0	50	2	10737036	0.250284	1
RAB40AL	208589	NaN	36	312174	95580	0	1	0	0	50	5	7348644	0.250356	1
ECM1	1532790	163	43	628074	178200	0	1	0	0	50	3	10602738	0.250471	1
TNFAIP1	1405196	214	10	369036	102870	0	1	0	0	50	6	10238724	0.250474	1
VEGFB	1613996	257	65	239112	76788	0	3	1	0	6	2	754110	0.250531	1
HUS1B	138359	674	23	305532	102222	0	1	0	0	50	7	9214398	0.25059	1
XRCC2	256955	444	6	327402	87156	0	1	0	0	50	6	8785260	0.250613	1
IFNAR1	857199	179	81	667602	165402	0	1	1	0	50	15	9368946	0.250926	1
KIF25	142012	702	-17	439668	138186	0	1	1	0	12	3	2758698	0.251093	1
EXOC6B	148260	625	-1	978966	246726	0	1	0	0	45	6	8037144	0.25122	1
PTCHD1	397667	NaN	-2	1008774	292248	0	3	1	0	50	10	10004796	0.251254	1
TWSG1	499362	387	43	269244	65124	0	1	0	0	50	8	9302526	0.2513	1
MED24	1613074	202	28	1162674	331290	0	2	0	0	50	4	9437310	0.251346	1
RIOK2	381706	614	28	670680	165726	0	1	0	0	50	4	13286592	0.251353	1
B4GALT3	728669	234	37	440964	145152	0	1	0	0	50	7	10251684	0.251389	1
OR4N2	275024	858	-57	343278	105300	0	1	0	0	50	5	8293266	0.25152	1
NCF1	895858	125	49	464616	125874	0	1	0	0	50	5	10693296	0.251665	1
LEMD2	1565139	428	28	569106	182250	0	2	0	0	50	10	8485074	0.251669	1
CDKL1	655106	279	33	430110	110808	0	1	0	0	50	6	11289456	0.251675	1
ADCY5	372027	458	42	1446660	433188	0	3	0	0	27	2	6303258	0.251788	1
NFX1	909394	141	38	1389636	346842	0	2	0	0	48	9	10101834	0.251835	1
NPAS3	24372	929	-23	1090908	319950	0	3	0	0	7	0	1398060	0.251956	1
TUBA1B	2141275	214	56	515646	149202	0	1	0	0	50	4	10654416	0.251985	1
ABT1	411992	498	24	308124	94770	0	1	0	0	50	10	12280248	0.252024	1
GRAMD1A	821282	419	-46	846450	247536	0	2	0	0	50	6	8905140	0.252086	1
AQP11	603969	401	30	305532	94932	0	1	0	0	50	7	8989056	0.252122	1
PIN4	374992	NaN	53	221292	59130	0	1	0	0	50	8	7355772	0.252144	1
TUBA1A	2141275	214	56	516132	149688	0	1	0	0	50	4	10654416	0.252194	1
NKX2-6	NaN	NaN	NaN	238626	84564	0	1	0	0	50	21	18125532	0.252593	1
ARFIP2	424988	469	20	395442	116802	0	1	0	0	50	8	11383578	0.252811	1
SFTPA1	478276	NaN	11	308610	87480	0	1	0	0	50	9	11236644	0.252904	1
SARNP	1861663	256	32	262764	65286	0	1	0	0	50	9	9564480	0.252968	1
CXorf22	3828	NaN	-13	1150686	303912	0	1	0	0	50	11	12851298	0.253114	1
FOLH1	11046	1009	-19	894240	235710	0	1	0	0	36	6	7573662	0.253142	1
AGBL5	1257014	290	34	1037448	314604	0	3	0	0	50	8	8899956	0.253196	1
FAM177B	221712	236	-4	194400	45198	0	1	0	0	50	14	10255086	0.253273	1
ZNF662	301212	447	21	571050	148230	0	1	0	0	50	4	11192904	0.253685	1
NAA11	103025	821	-5	266976	70308	0	1	1	0	50	7	8207568	0.253771	1
DPP8	620582	187	39	1075032	274590	0	1	0	0	50	6	9239184	0.253823	1
ATP1A2	835734	386	23	1184382	347004	0	1	0	0	35	6	9563670	0.253979	1
MSN	325257	NaN	47	693684	172368	0	2	0	0	12	0	2632500	0.254003	1
SLC25A2	800016	708	-15	337932	102384	0	1	0	0	50	13	11535372	0.254116	1
ROPN1L	628188	219	21	272160	73386	0	1	0	0	50	9	9672696	0.254145	1
IFNGR1	117339	309	35	572994	153576	0	1	0	0	50	12	8894772	0.254731	1
PTPLB	306542	274	38	299052	85374	0	1	0	0	50	6	7861374	0.255087	1
TRIM56	1066804	272	39	819720	283986	0	1	0	0	50	12	10506348	0.255129	1
C7orf42	490088	228	41	369198	101736	0	1	0	0	50	4	7515180	0.255255	1
CDX4	221528	NaN	-13	325134	93798	0	1	0	0	50	5	7354800	0.255447	1
NAMPT	246330	370	27	585306	151470	0	1	0	0	50	3	9644832	0.255743	1
UBE2F	507348	433	27	231336	57348	0	1	0	0	50	12	10360386	0.255834	1
GSTO2	293891	376	8	289170	76302	0	1	0	0	50	9	9334926	0.25589	1
GEMIN8	121538	NaN	35	288846	71280	0	1	0	0	50	8	9432774	0.256013	1
CPT1C	1716449	192	41	929556	277668	0	1	0	0	50	11	11294154	0.256045	1
DNAJC2	375620	620	8	762858	176094	0	1	0	0	50	12	9243234	0.256115	1
CTRB1	612638	171	16	306342	92178	0	1	0	0	50	7	8847954	0.256156	1
LRG1	2111443	278	43	380052	130248	0	1	0	0	50	6	9772488	0.256174	1
CAMK2B	1467518	412	65	794610	224046	0	3	0	0	50	9	7410366	0.256283	1
ZNF561	776094	617	-51	570888	146934	0	2	0	0	50	18	13749426	0.256304	1
TMOD4	1562281	184	33	416664	106272	0	1	0	0	50	5	9539856	0.256417	1
MVP	NaN	NaN	NaN	1014120	319464	0	1	0	0	50	21	18360432	0.256458	1
PHOX2B	308280	376	22	348948	114210	0	1	0	0	50	7	10595124	0.256496	1
C6orf15	2992134	283	23	357534	119718	0	1	0	0	50	9	9997668	0.256712	1
SLC22A7	1293543	363	51	607986	210924	0	2	1	0	41	8	7691112	0.256853	1
LIM2	368509	610	-9	249966	72738	0	1	0	0	50	6	6517098	0.256904	1
LARP4B	378329	515	9	862650	246888	0	1	1	0	50	9	8417358	0.257016	1
NR1H4	191698	787	-6	566676	140454	0	2	0	0	50	11	8989380	0.257246	1
AKD1	345757	686	21	2315304	555012	0	3	1	0	50	8	12469464	0.257324	1
EIF2B2	875817	222	53	410832	116964	0	1	0	0	50	4	8278686	0.25748	1
SLC34A2	218417	631	35	798822	231984	0	3	0	0	35	5	4588812	0.257506	1
CGRRF1	559596	348	34	396900	99306	0	1	0	0	50	6	10142658	0.257532	1
SLC34A3	1724821	399	43	669708	229878	0	2	0	0	50	7	7570584	0.257883	1
ATP4A	1081638	390	41	1200744	351540	0	2	0	0	50	3	8275284	0.257905	1
SEMA3F	905995	196	40	911412	269568	0	1	0	0	50	11	10204542	0.258049	1
KRTAP4-9	NaN	NaN	NaN	244458	63180	0	1	0	0	50	21	18104148	0.258143	1
PRDX2	1937827	226	32	296784	85698	0	1	0	0	50	8	9598014	0.258166	1
COMMD4	814680	296	43	237492	68688	0	1	0	0	50	10	9021456	0.258468	1
AASDHPPT	86519	753	-16	367416	94284	0	1	0	0	50	7	10688112	0.258489	1
SSX5	590474	NaN	11	283986	66906	0	1	0	0	50	8	9167580	0.258559	1
ULBP2	423805	245	34	287874	81000	0	1	0	0	50	8	9117198	0.258787	1
PCDHA6	896676	606	-12	1061586	338580	0	3	0	0	50	11	11034144	0.258832	1
GTF2IRD1	896611	194	52	1126224	324000	0	1	0	0	50	5	8701668	0.259052	1
CACNA1A	1604988	497	12	2955204	844830	0	5	1	0	50	14	11291562	0.25909	1
IRF8	407770	461	27	500094	137538	0	1	1	0	50	5	11669346	0.259139	1
ATP1A1	616485	464	18	1206900	335664	0	1	0	0	50	5	8834832	0.259394	1
RBM12	1423559	169	53	1036638	325620	0	1	0	0	50	7	8484102	0.259405	1
SPTY2D1	637558	457	28	788616	221292	0	2	0	0	50	9	10014516	0.259622	1
TMEM38B	214951	773	-8	341820	93636	0	1	0	0	50	8	10972746	0.259816	1
AADAC	200470	526	2	462996	128952	0	1	0	0	50	5	10766520	0.2599	1
CADM2	8467	1155	-19	537030	149688	0	1	0	0	20	0	3565134	0.260017	1
MMP24	1290513	170	45	653508	183384	0	1	0	0	50	3	10562238	0.260024	1
DUSP22	224772	684	46	226800	56538	0	1	0	0	50	7	6549336	0.260115	1
EMR1	748613	383	27	1057860	275238	0	2	0	0	50	8	12610080	0.260118	1
CMPK1	257134	210	7	273132	70470	0	1	0	0	50	9	9619560	0.260229	1
CAPN6	132204	NaN	23	760104	199260	0	2	0	0	50	6	7672968	0.260282	1
P2RY2	554585	189	59	410508	142560	0	1	0	0	50	5	9233676	0.260351	1
C10orf120	321415	530	1	394632	101088	0	1	0	0	50	7	10905354	0.260375	1
STAR	705837	277	46	335664	92988	0	1	0	0	50	8	10549926	0.260486	1
ANXA1	247950	411	-15	420876	108378	0	1	0	0	50	4	8365032	0.260537	1
IVD	880617	184	45	502686	141264	0	1	0	0	50	4	9533376	0.260969	1
TSTA3	2183482	235	37	386208	102708	0	1	0	0	50	5	8935920	0.261028	1
SPRYD5	4214	1074	-46	539460	132678	0	2	0	0	50	12	9111852	0.261126	1
EFNA1	1801444	194	32	244944	63180	0	1	0	0	50	10	9072000	0.261129	1
2022-09-02	1242448	383	24	441126	109998	0	1	0	0	50	5	9883782	0.261229	1
C5orf15	568918	269	60	303102	88614	0	1	0	0	50	6	8005878	0.261284	1
SPRY2	44501	729	60	356724	105948	0	1	0	0	50	6	9113310	0.261417	1
ABL2	328468	301	6	1405836	417636	0	2	0	0	50	4	11126646	0.261451	1
PPP1R1B	1164935	239	28	245754	64800	0	1	0	0	50	9	8608194	0.261453	1
WDR86	608657	190	39	422820	136566	0	1	0	0	50	5	9306414	0.261515	1
SNX11	1195543	255	11	317358	89424	0	1	0	0	50	7	9414792	0.261649	1
MEI1	1452842	180	49	1484244	433998	0	3	1	0	50	6	10397160	0.261815	1
CYP8B1	301212	447	21	566676	165240	0	1	0	0	50	4	11192904	0.261933	1
SLC25A43	655775	NaN	34	384588	121824	0	1	0	0	50	7	11000286	0.262249	1
IL1RAPL1	11003	NaN	14	823446	213192	0	3	0	0	22	5	5227416	0.262396	1
METTL2B	893183	199	45	453924	115182	0	1	0	0	50	5	10435554	0.26246	1
TRMT5	216411	578	-1	592920	159408	0	1	0	0	50	11	8373132	0.262552	1
ZFPL1	3267059	207	46	354456	112590	0	1	0	0	50	8	9320832	0.262616	1
MGAM	196155	846	-7	2210652	589680	0	5	0	0	34	5	7036146	0.262629	1
FAH	201157	561	32	503658	134946	0	1	1	0	25	10	5210406	0.262912	1
C10orf58	340132	598	-7	269892	75168	0	1	0	0	50	6	7076160	0.262938	1
STX16	1026997	504	15	385398	105462	0	1	0	0	50	5	8830296	0.26323	1
ARMC5	839076	558	11	1101438	424602	0	1	0	0	36	4	7301340	0.263453	1
EFNB1	141847	NaN	19	396090	117612	0	1	0	0	50	4	7536402	0.263728	1
ANO5	51558	935	-7	1102410	271026	0	2	0	0	50	6	11056014	0.263858	1
OVCH1	100195	539	-5	1353024	355266	0	3	0	0	50	12	9834534	0.26392	1
MYLK4	470344	285	28	474984	113562	0	1	0	0	50	4	8889426	0.263948	1
CCDC144A	1101297	499	-18	1711368	404676	0	4	2	0	50	14	8704908	0.264009	1
FBXO16	295355	204	47	354132	88614	0	1	0	0	50	6	8790444	0.26403	1
PA2G4	2785610	165	39	479682	119556	0	1	0	0	50	4	9113634	0.264047	1
FAM119B	1160849	344	39	312822	91530	0	1	0	0	50	7	9181026	0.264074	1
TMED2	987941	424	47	237006	63342	0	1	0	0	50	14	11908296	0.264086	1
SLC39A7	1474628	377	24	532494	166374	0	2	0	0	50	15	10715976	0.264154	1
MICAL2	319572	254	10	1324188	366606	0	3	1	0	50	11	8885376	0.264174	1
KCNK5	181911	634	29	567324	169452	0	1	0	0	50	4	9630900	0.26426	1
MIB1	246867	325	47	1187298	319788	0	3	0	0	24	3	5016330	0.264266	1
SYCP1	601139	601	2	1216782	267948	0	1	0	0	50	7	11029284	0.264362	1
TP53INP1	418153	395	48	296136	72738	0	1	0	0	50	8	9641430	0.264429	1
MAP3K6	884974	188	30	1469016	464778	0	1	0	0	50	8	13034196	0.264533	1
HDDC2	155442	373	-19	244620	63990	0	1	0	0	50	11	9976122	0.264562	1
CALML6	1434423	233	27	224532	51516	0	1	0	0	50	11	9144414	0.264871	1
HMGCLL1	28261	691	-14	434808	123606	0	1	0	0	50	9	12547386	0.264875	1
FKBP15	448462	456	9	1432242	399006	0	1	0	0	50	3	8877924	0.264986	1
PALB2	544239	561	38	1377324	376650	0	2	0	0	50	4	10762146	0.265169	1
MR1	201966	253	23	401274	108054	0	1	0	0	50	6	8722728	0.265175	1
THOC1	402181	689	-26	807732	191484	0	2	0	0	50	7	8896716	0.265192	1
PLSCR4	119025	361	-10	394470	102222	0	1	0	0	50	7	11123082	0.265465	1
CLDN15	1022626	258	39	260658	81000	0	1	0	0	50	9	8967024	0.265509	1
C6orf105	117356	372	24	294516	80190	0	1	0	0	50	8	9216504	0.265529	1
PHIP	209556	739	0	2167074	565218	0	3	0	0	7	0	2686122	0.265575	1
CLEC12A	305376	565	19	321894	75654	0	1	0	0	50	13	11905542	0.265676	1
LMBRD2	174910	599	-4	837216	210600	0	1	1	0	50	13	10078182	0.265705	1
AP1G1	460697	NaN	24	981234	267786	0	2	0	0	50	7	10624770	0.26574	1
CILP	720558	183	57	1348650	392688	0	2	0	0	50	3	9003312	0.265745	1
ALDH5A1	407627	461	18	626454	194400	0	1	0	0	50	3	10124514	0.266052	1
TFAP2A	199695	375	6	526662	154710	0	2	1	0	50	11	8100000	0.266116	1
PLEKHB2	461881	331	16	268434	70308	0	1	0	0	50	9	9207918	0.266179	1
ODF3L2	1370962	423	-24	317520	111132	0	1	0	0	50	9	8178246	0.266459	1
MTX2	239999	888	11	322866	79542	0	1	0	0	50	8	9508266	0.266519	1
CTAGE6P	453170	544	-7	889866	245430	0	1	0	0	50	6	7226172	0.266636	1
ZNF678	606105	575	-6	689796	163134	0	2	0	0	50	10	9913266	0.266806	1
TPPP2	971417	320	12	202662	53460	0	1	0	0	50	11	8180028	0.266911	1
AMELX	NaN	NaN	NaN	244458	67554	0	1	0	0	50	21	18108522	0.266916	1
KRTAP10-3	860604	461	30	249318	76302	0	1	0	0	50	11	10053720	0.267123	1
PSMF1	524116	527	14	316548	93636	0	1	0	0	50	7	9165960	0.267135	1
DMGDH	215159	434	45	1011366	282852	0	2	1	0	50	7	11158236	0.267446	1
IL1R2	215759	556	12	467046	131220	0	1	0	0	50	5	10171332	0.267634	1
PCYOX1L	422727	380	28	563598	168804	0	1	0	0	50	3	8801460	0.267772	1
FCER1A	285980	737	-6	309258	76626	0	1	0	0	50	10	11269044	0.267818	1
MAN2A2	833957	291	42	1325808	394146	0	3	1	0	50	7	9880056	0.267904	1
HIST1H3F	390169	544	57	151470	50220	0	1	0	0	50	11	6308280	0.268113	1
UPK1A	1162794	390	27	302454	86832	0	1	1	0	35	4	5641974	0.26822	1
TRIB1	322911	193	40	415044	132678	0	1	0	0	50	5	9012384	0.268305	1
CANT1	612708	177	22	455544	136404	0	1	1	0	50	4	8485074	0.268562	1
PTDSS2	2206786	344	58	573480	159408	0	1	0	0	50	4	10980036	0.268982	1
EDA2R	28261	NaN	-6	350730	94446	0	1	0	0	50	7	9734094	0.269088	1
AMHR2	1712232	191	56	670032	188244	0	1	0	0	50	3	10254276	0.269133	1
ZNF432	436768	901	-53	769500	188406	0	1	0	0	50	10	7824114	0.269251	1
ME3	346701	316	1	703080	206226	0	1	0	0	50	3	10753560	0.269257	1
PTGDR	405022	533	18	393660	134136	0	1	0	0	50	8	12117438	0.269286	1
TBC1D22B	516467	376	38	602478	158598	0	1	0	0	50	3	9346428	0.269297	1
TROVE2	288840	433	-13	659502	170586	0	1	0	0	50	2	8212590	0.269406	1
DAZL	140687	470	24	356724	94284	0	1	0	0	50	6	8797248	0.269416	1
TEAD3	683460	280	36	516132	142884	0	1	0	0	50	5	10952334	0.269802	1
GRID2	4518	1143	-17	1170288	328050	0	2	0	0	45	3	7732422	0.269812	1
ZKSCAN4	273319	502	35	633744	170100	0	1	0	0	50	2	8059014	0.269828	1
IRS4	110759	NaN	29	1389960	446148	0	2	0	0	50	5	12194226	0.269957	1
PTCD3	971062	420	46	847422	205254	0	1	0	0	50	15	11750832	0.269963	1
OR10Z1	179404	940	1	347004	110322	0	1	0	0	50	8	10456452	0.270029	1
C6orf138	100851	907	-18	962928	276858	0	1	0	0	50	13	11265804	0.270138	1
CYP2D6	1296288	363	43	563112	180468	0	1	0	0	50	4	10415952	0.270153	1
KDR	175189	706	3	1607850	427032	0	1	0	0	50	3	9237402	0.270196	1
TEAD4	506329	267	35	516618	138996	0	1	0	0	50	4	9833724	0.270329	1
FLNC	830283	310	35	3124170	941706	0	6	2	0	50	9	10448190	0.270354	1
RNASET2	225834	633	18	312336	78894	0	1	0	0	50	7	8620506	0.270363	1
OR13J1	847663	227	54	340848	115020	0	1	0	0	50	7	9398916	0.270561	1
TSGA13	278944	433	9	331128	82944	0	1	0	0	50	7	9125622	0.270701	1
OR2A42	199649	767	-2	341496	110970	0	1	0	0	50	9	11270988	0.270771	1
PARS2	578299	343	23	531846	164106	0	1	0	0	50	4	9808938	0.270827	1
SC5DL	173979	744	28	355752	89424	0	1	0	0	50	7	9795006	0.270913	1
NFKB2	975992	178	39	1033560	322866	0	2	0	0	50	15	11822760	0.270981	1
WDR89	320174	221	27	447120	120528	0	1	0	0	50	7	12302604	0.27107	1
SLC4A11	1086365	338	49	1113102	329832	0	1	0	0	50	7	8791578	0.271088	1
OR5AU1	730598	357	36	406296	122472	0	1	0	0	50	7	11175084	0.271152	1
GUCY2C	339860	720	4	1288224	328212	0	3	0	0	50	5	8136450	0.271305	1
GSTK1	379894	399	14	329832	95418	0	1	0	0	50	8	10416276	0.271391	1
ZIM3	311003	924	-64	565380	132030	0	2	0	0	50	11	8558622	0.271708	1
MAGEA6	203033	NaN	-1	356238	104976	0	1	0	0	50	8	10848978	0.271761	1
CPS1	158852	465	-1	1780704	491346	0	4	1	0	18	1	3920076	0.271803	1
IFLTD1	200328	517	1	523584	135432	0	1	0	0	50	4	9615024	0.271812	1
NOX1	352830	NaN	29	669870	177228	0	1	0	0	50	3	10550412	0.271961	1
CC2D1A	930314	231	32	1107756	334692	0	2	0	0	50	4	8411526	0.272317	1
PARD6G	161542	NaN	38	412776	140778	0	1	0	0	32	2	5074164	0.272392	1
IBSP	423426	538	1	381996	93312	0	1	0	0	50	8	11389572	0.272473	1
CCR1	211405	639	48	400302	120690	0	1	0	0	50	4	7209000	0.272736	1
PDGFC	39685	595	-24	404676	109512	0	1	0	0	13	0	2539674	0.272781	1
PISD	538801	268	47	432540	127332	0	1	0	0	50	5	9207918	0.272878	1
KIAA1524	214268	867	2	1079730	280098	0	2	1	0	50	5	9326178	0.272887	1
EBAG9	134329	623	8	259524	64152	0	1	0	0	50	10	9247770	0.272962	1
PROM2	238302	558	8	964872	297270	0	1	0	0	50	11	10430208	0.272981	1
C1orf186	755856	400	10	209466	52488	0	1	0	0	50	10	7602336	0.273051	1
CCDC150	165315	393	3	1340712	318492	0	2	1	0	50	10	9793224	0.27322	1
RALY	873171	398	61	355104	108054	0	1	0	0	50	7	9507618	0.273291	1
HSD17B4	302141	472	27	879984	239274	0	2	0	0	50	6	8567856	0.273502	1
NRL	992350	355	19	258228	92664	0	1	0	0	50	10	9682578	0.27385	1
CRYZ	103167	1070	-17	388152	108540	0	1	0	0	50	7	10542636	0.274073	1
NDUFB5	397411	520	10	225828	61884	0	1	0	0	50	11	8664408	0.274211	1
FIBP	3779084	287	42	431568	118098	0	1	0	0	50	5	8983710	0.274256	1
IL17RE	950574	170	54	764154	240894	0	2	0	0	36	6	7378614	0.274324	1
CD40	559725	526	55	349272	72576	0	1	0	0	50	4	6333552	0.274749	1
FAM129B	857814	182	46	876582	247536	0	2	0	0	50	7	9445572	0.274781	1
NDUFA9	277828	874	18	445824	125712	0	1	0	0	50	5	9412848	0.274784	1
C10orf2	1020226	247	40	774198	240570	0	2	0	0	50	8	9173898	0.274876	1
HNRNPH1	1600541	229	28	544968	135432	0	1	0	0	50	4	9604656	0.275147	1
MOS	344171	552	20	377622	127818	0	1	0	0	50	9	12453264	0.27523	1
ITGAV	266463	373	7	1267002	342630	0	3	0	0	50	11	7452486	0.275322	1
NEDD4L	321507	522	58	1188918	306990	0	3	2	0	50	11	6845310	0.275425	1
VANGL1	71378	604	7	600048	177066	0	2	0	0	21	6	5782590	0.275654	1
PLA2G4A	265620	592	-18	904608	221940	0	2	0	0	50	6	8758044	0.275688	1
DBX2	126551	805	-18	379566	121986	0	1	0	0	50	7	10226736	0.275941	1
ART3	507519	322	41	475956	114048	0	1	0	0	50	4	8586324	0.275954	1
UBE2J2	2050211	196	28	326268	88776	0	1	0	0	50	8	9748188	0.276206	1
ALG11	385945	461	41	567972	157626	0	1	0	0	50	4	10233702	0.27624	1
APBA2	161108	927	-21	879984	236844	0	3	1	0	50	15	10255086	0.276258	1
FANCB	111662	NaN	21	1008450	260982	0	2	1	0	50	6	9642402	0.276326	1
2022-03-06	627256	164	17	1074222	302616	0	1	1	0	50	8	9288432	0.276351	1
FAM131B	379715	379	29	420876	117126	0	1	0	0	50	6	10073322	0.276357	1
BTN1A1	426020	498	34	602640	178362	0	2	1	0	50	10	8272368	0.276408	1
TNFSF14	745830	259	29	269892	89262	0	1	0	0	50	11	10453698	0.276424	1
C3orf1	290702	599	38	333882	94770	0	1	0	0	50	7	8817012	0.276502	1
ORC1L	815523	448	26	996948	290952	0	2	0	0	50	7	10678878	0.276652	1
C6orf141	NaN	NaN	NaN	265842	91368	0	1	0	0	50	21	18132336	0.276893	1
EEF2	2173603	207	30	995490	285120	0	2	0	0	49	6	9598500	0.276968	1
PICALM	366028	313	11	790722	211896	0	1	0	0	50	13	9919584	0.277016	1
GPR158	43942	814	-21	1390932	402408	0	6	1	0	7	1	1639926	0.277153	1
TMEM169	603452	419	35	339714	96714	0	1	0	0	50	8	10104750	0.277249	1
CNTN2	655446	431	37	1200258	360288	0	2	1	0	50	4	8997804	0.277309	1
LINGO2	8941	927	-34	682830	204120	0	2	0	0	50	10	8938998	0.277405	1
OIP5	897414	237	24	263412	80676	0	1	0	0	50	7	7051860	0.277449	1
PCSK6	372683	406	-1	1314630	369360	0	3	0	0	50	6	8633790	0.277455	1
NONO	728362	NaN	26	560520	147096	0	1	0	0	50	8	13083444	0.277621	1
CCDC68	89155	373	-5	413586	97686	0	1	0	0	50	7	11063466	0.277631	1
P4HA3	641945	201	37	631638	187272	0	1	0	0	50	3	9451566	0.277657	1
RFPL3	413546	556	-16	360612	104976	0	1	0	0	50	9	10081260	0.277684	1
CALCOCO1	1501666	272	56	810162	225990	0	2	0	0	50	8	9333630	0.277822	1
SNRPN	NaN	NaN	NaN	272484	90558	0	1	0	0	50	21	18131526	0.277938	1
FBXW8	208959	359	16	694494	199260	0	2	0	0	50	8	8061930	0.277943	1
ZNF167	419284	467	45	887112	232146	0	2	0	0	31	4	6633900	0.27807	1
YWHAQ	700762	154	40	292248	76140	0	1	0	0	50	8	8966214	0.278131	1
REEP3	207194	412	22	306018	80838	0	1	0	0	50	8	9387414	0.278168	1
BBX	224591	699	2	1118124	284472	0	2	0	0	50	6	10642104	0.278221	1
WNK4	1633092	190	33	1396278	453438	0	3	0	0	50	6	9270126	0.278334	1
KEL	294033	676	2	862002	241704	0	1	1	0	50	8	7919532	0.278359	1
C13orf1	342767	321	50	235872	59130	0	1	0	0	50	11	8890560	0.278362	1
OR10K1	177013	929	7	344574	112266	0	1	0	0	50	9	9274014	0.278397	1
KCNQ2	1314528	298	49	1023192	311850	0	2	0	0	50	9	12488904	0.278428	1
ZNF99	83716	1439	-72	1240596	283986	0	2	1	0	50	12	9780588	0.278552	1
CSNK1A1	607110	152	32	445338	107730	0	1	0	0	50	6	9138906	0.27856	1
GDI1	2277674	NaN	40	532980	139644	0	1	0	0	50	4	9360684	0.278599	1
RPA4	53531	NaN	36	297270	84726	0	1	0	0	50	9	9653418	0.27885	1
KIAA0528	213736	811	-9	1186974	319140	0	2	0	0	50	11	9003474	0.278878	1
CXCR6	NaN	NaN	NaN	391878	110160	0	1	0	0	50	21	18151128	0.278883	1
GNA14	180930	608	-10	423468	107244	0	1	0	0	50	7	11266452	0.27891	1
ADH4	166160	760	1	445500	126522	0	1	0	0	50	6	10116576	0.278948	1
EPB41L1	1300256	235	50	1036800	289980	0	2	0	0	50	6	9923310	0.27896	1
LGR5	250555	516	-34	1054134	303750	0	1	0	0	50	9	9829188	0.278978	1
PPP1CB	483830	229	30	393660	100116	0	1	0	0	50	5	8161236	0.279061	1
LRRC33	1117984	250	31	763182	251100	0	2	0	0	50	8	8919882	0.279262	1
MAD1L1	814176	544	26	847584	233766	0	2	1	0	50	10	11712762	0.279273	1
GCLM	558028	275	9	324972	87642	0	1	0	0	50	10	11483370	0.279312	1
ZNF578	547660	989	-53	701946	165564	0	2	1	0	50	9	8758854	0.27936	1
GPM6B	135235	NaN	35	426870	109674	0	2	1	0	17	3	2732454	0.279525	1
OLIG2	824830	554	61	350082	124254	0	1	0	0	50	7	9124488	0.27959	1
POGZ	1356854	163	37	1617732	479844	0	3	0	0	50	8	12805290	0.279738	1
DUS1L	3850694	197	34	562140	154224	0	1	0	0	50	3	8563644	0.279743	1
BCL6	88374	374	24	817614	228744	0	2	0	0	50	8	9341892	0.279784	1
SNAPC2	952640	320	27	366282	130896	0	1	0	0	50	7	9525276	0.280131	1
HS2ST1	332598	515	0	426870	106272	0	1	0	0	50	6	9882972	0.280139	1
LBXCOR1	305591	319	21	1030158	331614	0	1	0	0	50	10	10941966	0.280143	1
CXCR3	947642	NaN	52	456192	160056	0	1	0	0	50	5	9412038	0.280203	1
VAPB	962331	385	24	289818	75654	0	1	0	0	50	12	11888532	0.280266	1
GCM2	263829	483	14	585468	162486	0	2	0	0	50	11	8652582	0.28066	1
OSR1	63105	842	-9	299862	93312	0	1	0	0	50	13	13146948	0.280749	1
TSPYL1	260958	593	22	491670	146934	0	1	0	0	50	11	10926414	0.280889	1
TNFRSF14	339388	228	38	334206	93474	0	1	0	0	50	6	7838856	0.281112	1
TUBGCP2	362932	393	1	1052838	296784	0	2	0	0	50	5	8819928	0.28115	1
ABCA8	295848	637	-41	1883250	495234	0	4	1	0	50	6	9735228	0.281174	1
CLMN	207561	612	30	1170936	314766	0	2	0	0	50	4	8666190	0.281245	1
NBPF1	675669	259	40	1374084	336150	0	2	0	0	50	6	13062546	0.281434	1
FPR3	435870	690	-35	399492	118584	0	1	0	0	50	6	9352422	0.28156	1
SULT1B1	14468	1020	1	363852	82782	0	1	0	0	50	7	9571770	0.28157	1
ANKRD27	369667	455	-38	1247724	339066	0	2	0	0	50	3	7931844	0.281605	1
DUSP9	1716845	NaN	44	423954	143208	0	1	0	0	50	5	8693244	0.281658	1
TAS1R2	636814	532	25	954342	280584	0	2	0	0	50	7	10003824	0.281664	1
[truncated: 16,865 more rows]

## Sheet: African-American
Table SVII. Mutation significance scores.
gene	expr	reptime	hic	N_nonsilent	N_silent	N_noncoding	n_nonsilent	n_silent	n_noncoding	nnei	x	X	p	q
SETD8	1167786	177	45	33345	9126	0	8	0	0	50	1	774722	4.03122e-13	7.60369e-09
PRSS1	285408	636	11	23322	6474	0	8	0	0	50	0	884312	5.92063e-08	0.000558374
TMIE	298503	495	41	14625	4212	0	4	0	0	50	1	692822	9.01579e-08	0.000566853
PABPC1	1141833	276	41	60281	16393	0	4	0	0	50	1	922246	7.69038e-06	0.036264
OR8D4	89099	736	-8	28353	8424	0	3	0	0	50	0	938717	1.39229e-05	0.0525227
OR6P1	NaN	NaN	NaN	28262	8905	0	3	0	0	50	2	1456637	1.80836e-05	0.0568487
EPHB6	284406	645	18	92742	29289	0	4	0	0	43	0	701415	3.39677e-05	0.0915285
BMP2K	234707	489	30	110370	29328	0	4	0	0	50	0	743678	4.7777e-05	0.112646
MEF2A	197556	416	12	51766	14378	0	3	0	0	50	0	830037	0.000114982	0.225696
TPP1	424523	491	17	52091	15847	0	3	0	0	50	0	823875	0.000119657	0.225696
ALDH6A1	495634	236	40	50063	14443	0	3	0	0	50	0	612118	0.00025198	0.432078
F5	294416	415	11	208923	55146	0	13	0	0	50	1	809809	0.00040229	0.632333
ROM1	2695768	217	42	30420	11076	0	2	0	0	50	0	865826	0.000574496	0.817765
CDKL4	391680	375	16	30420	7644	0	2	0	0	50	0	811148	0.000654855	0.817765
KIAA1012	416975	489	28	136409	35971	0	3	0	0	50	0	807092	0.000664312	0.817765
MAGEF1	1301642	485	36	27755	8281	0	2	0	0	50	1	961558	0.000693683	0.817765
FAM131C	876105	197	40	26377	7436	0	2	0	0	50	1	779948	0.000956302	1
NOX4	30048	1071	-25	56017	14378	0	2	0	0	50	0	1125527	0.00115582	1
SERPINI2	135686	933	-18	39221	9529	0	2	0	0	50	0	783913	0.0011681	1
C5orf25	532154	427	25	42887	11947	0	2	0	0	50	1	819650	0.00232188	1
KRT76	1444461	422	38	59150	16939	0	2	0	0	50	0	817037	0.00245319	1
MAGED2	257482	NaN	20	56394	16497	0	2	0	0	50	0	741156	0.00271097	1
CTU2	802673	189	41	48568	14144	0	2	0	0	50	1	757731	0.00350915	1
HMHA1	2387949	206	26	104871	31590	0	2	0	0	50	0	1183078	0.00368357	1
ZNF717	NaN	NaN	NaN	86684	20956	0	4	0	0	50	2	1468688	0.00453138	1
PAPSS2	379125	169	46	58305	16107	0	3	0	0	50	0	586287	0.00463982	1
OR2A5	222080	812	-11	27833	8632	0	2	0	0	50	2	732810	0.00647374	1
SIRPB1	421731	424	39	70473	21489	0	2	0	0	50	1	803582	0.00663037	1
GOLGA2	1813435	201	46	95641	25688	0	2	0	0	50	0	761397	0.00740931	1
MED15	474817	286	44	74529	20514	0	2	0	0	50	1	783120	0.00782505	1
EFHC1	396934	431	34	60879	15990	0	4	0	0	50	0	730223	0.00862142	1
TSC22D1	205312	350	38	99099	31824	0	2	0	0	50	0	714792	0.0089879	1
GP6	1125216	432	-26	58474	15353	0	2	0	0	50	0	688948	0.00909253	1
G6PD	2163759	NaN	42	51532	14222	0	4	0	0	50	1	807131	0.0103005	1
ATXN1	109777	623	30	72345	23283	0	2	0	0	50	2	835081	0.0104501	1
GPRC6A	232554	730	-15	86320	23075	0	2	0	0	50	1	775359	0.0107566	1
MTHFR	530804	196	39	61425	17160	0	4	0	0	50	0	636298	0.0113639	1
NEBL	71095	484	-19	112268	25168	0	2	0	0	50	0	688974	0.0123906	1
ARID1B	143122	621	27	206791	59423	0	3	1	0	50	2	761202	0.0137695	1
RPS21	1190359	252	33	8567	2119	0	1	0	0	50	0	585728	0.0146239	1
HIST4H4	340728	578	-4	9113	3211	0	1	0	0	50	0	574899	0.0158485	1
CMTM5	1220624	456	31	14612	4381	0	1	0	0	50	0	909415	0.0160643	1
CNPY1	267612	599	-5	9334	2015	0	1	0	0	50	1	725907	0.0171171	1
NOP10	542657	234	22	6175	1664	0	1	0	0	50	0	688129	0.017781	1
DENND4B	2028800	222	34	134641	44720	0	2	0	0	50	0	667628	0.0188777	1
UBE2D2	641116	244	39	14573	3679	0	1	0	0	50	1	951938	0.0203959	1
ATG12	384075	759	1	13117	3848	0	1	0	0	50	1	848354	0.0206008	1
EIF1AX	262207	NaN	37	14742	3159	0	1	0	0	50	0	706511	0.0208593	1
A2ML1	300254	407	12	137800	37934	0	2	0	0	50	1	880932	0.0213625	1
C11orf51	715293	267	62	12454	2444	0	1	0	0	50	1	660725	0.0251413	1
RAI1	1199281	260	16	169130	54613	0	5	0	0	50	1	844116	0.0262982	1
LCE2B	169158	818	24	10205	2938	0	1	0	0	50	0	737061	0.0272967	1
C11orf86	NaN	NaN	NaN	10491	3315	0	1	0	0	50	2	1451047	0.0284977	1
PGPEP1L	217299	248	-20	18083	5590	0	1	0	0	50	1	804063	0.0300307	1
PFN2	622464	490	17	16406	4381	0	1	0	0	50	1	713427	0.0307117	1
SYCN	1652029	286	26	12090	4017	0	1	0	0	50	0	769899	0.0309003	1
NANOS3	754888	241	31	17017	5720	0	1	0	0	50	1	727298	0.0312517	1
SLC25A34	683349	174	22	27027	9282	0	1	0	0	50	0	849173	0.0318042	1
OR5I1	4262	1044	-40	28431	8385	0	1	0	0	50	0	869895	0.0326581	1
PPP1R11	1820240	496	30	11687	3484	0	1	0	0	50	0	689845	0.0332939	1
C16orf78	18490	907	-25	25623	6201	0	1	0	0	50	0	766766	0.0333901	1
CHIC1	319167	NaN	11	21567	5538	0	2	0	0	50	1	846027	0.03407	1
FAM128B	349797	593	22	14183	4810	0	1	0	0	50	0	807716	0.0344863	1
C11orf88	401074	326	18	19175	4810	0	1	0	0	50	1	737997	0.0347302	1
UTS2D	112669	773	9	11739	2925	0	1	0	0	50	1	984828	0.0351118	1
TNFSF9	836909	212	21	21892	8333	0	1	0	0	50	0	616655	0.035469	1
CLEC17A	1022856	198	29	28470	7254	0	1	0	0	50	0	787579	0.0361148	1
TIPRL	475438	391	16	27118	6656	0	1	0	0	50	0	749879	0.0361292	1
OR6C3	667726	802	-14	28210	8255	0	1	0	0	50	0	710203	0.0396762	1
RBM24	249340	560	-6	22451	7111	0	1	0	0	50	1	750542	0.0400272	1
TCF15	617464	404	39	17277	6357	0	1	0	0	50	0	841516	0.0401989	1
HBB	109545	1056	-1	13533	4173	0	1	0	0	50	0	657163	0.0403182	1
DAZL	140687	470	24	28626	7566	0	1	0	0	50	0	705952	0.0405018	1
RPL14	195734	546	20	20735	5668	0	1	0	0	50	1	668161	0.041538	1
ZBTB42	NaN	NaN	NaN	37180	12467	0	1	0	0	50	2	1460199	0.0426227	1
PEX3	318754	401	13	36192	9282	0	1	0	0	50	0	847990	0.0426243	1
OR5K4	414958	885	-14	29211	8385	0	1	0	0	50	0	677040	0.0430879	1
BHLHE22	9265	1050	-1	32877	11817	0	1	0	0	50	0	753246	0.0435879	1
RBMS3	30243	808	-11	43810	11375	0	1	0	0	50	0	997763	0.0438481	1
LZIC	757819	183	29	18733	4550	0	1	0	0	50	0	831636	0.044014	1
SIRT4	1621662	187	56	28691	8593	0	2	0	0	50	1	864799	0.0444317	1
GKAP1	468451	384	5	36101	8554	0	1	0	0	50	0	799279	0.0451015	1
IFNA8	242654	411	-6	17576	4732	0	1	0	0	50	0	714753	0.0479465	1
OR5AC2	200002	811	-15	27937	8255	0	1	0	0	50	1	770081	0.0486223	1
FAM173A	1207790	194	33	20748	7644	0	1	0	0	50	0	821951	0.049185	1
SFXN5	453374	421	27	32266	9659	0	1	0	0	50	1	874380	0.0494654	1
GPX1	1661046	201	34	19253	6526	0	1	0	0	50	0	753259	0.0497869	1
C14orf50	662511	188	36	41236	10127	0	1	0	0	50	0	826254	0.0498194	1
KCNRG	337743	357	44	28093	7982	0	1	0	0	50	1	752349	0.0500587	1
C1orf58	221959	236	-1	40014	10140	0	1	0	0	50	0	776971	0.0514037	1
KIAA0174	471197	218	31	33787	9854	0	1	0	0	50	0	650702	0.0518253	1
SNX32	3779084	287	42	38363	10777	0	1	0	0	50	0	720915	0.0531083	1
F2RL3	901964	305	31	32604	12714	0	1	0	0	50	1	819741	0.05322	1
C19orf26	2214581	234	29	40144	13520	0	1	0	0	50	0	748072	0.0535546	1
CASQ2	287179	639	8	39312	9048	0	1	0	0	50	0	725894	0.054045	1
CHGA	325312	387	30	42939	11739	0	1	0	0	50	0	787592	0.0544054	1
ZMYND19	1315685	404	41	21567	5889	0	1	0	0	50	0	766714	0.0546475	1
HTRA1	252955	279	5	43771	13754	0	1	0	0	50	0	789971	0.055289	1
QRFPR	268761	809	-2	40261	11063	0	1	0	0	50	0	717093	0.0560206	1
RGS11	1340678	205	43	44967	12519	0	1	0	0	50	0	798213	0.0562092	1
DYRK4	276521	874	24	49881	12792	0	1	0	0	50	0	876733	0.0567651	1
SH2D3A	736129	272	27	51389	17524	0	1	0	0	50	0	895570	0.057249	1
FKBP2	1613996	257	65	13559	3952	0	1	0	0	19	0	235404	0.0574647	1
CALHM2	542721	170	51	28808	9256	0	1	0	0	50	1	663689	0.0580674	1
ARHGEF9	108759	NaN	-13	51337	11960	0	1	0	0	50	0	876967	0.0583989	1
PGLYRP2	524410	481	33	50791	17420	0	1	0	0	50	0	862680	0.0587331	1
OPN1LW	2438903	NaN	17	33917	9646	0	1	0	0	50	0	1112020	0.0591101	1
IL20	467839	385	39	16887	4524	0	1	0	0	50	1	827398	0.0593473	1
TMEM218	428178	762	30	10439	3601	0	1	0	0	50	2	676247	0.0598445	1
FAM43B	573203	429	30	28691	9919	0	1	0	0	50	2	792597	0.060195	1
AIG1	298429	699	13	22763	6058	0	1	0	0	50	0	713336	0.0617539	1
RALY	873171	398	61	28496	8671	0	1	0	0	50	2	762957	0.0620279	1
HOMEZ	1171456	330	20	49712	14911	0	1	0	0	50	0	790816	0.0626888	1
PIGV	1022828	188	30	44187	14079	0	1	0	0	50	0	695071	0.0633933	1
TMEM41A	953031	366	31	24258	7449	0	1	0	0	50	0	738361	0.0635177	1
C15orf41	74456	598	-16	27820	6890	0	1	0	0	50	0	832299	0.0645851	1
MXRA8	1744013	273	28	40586	12727	0	1	0	0	50	1	832520	0.0649439	1
CHRNA3	495901	373	46	52312	14144	0	1	0	0	50	0	798304	0.0653336	1
ARL13A	414180	NaN	45	28795	7631	0	1	0	0	50	1	588159	0.0653774	1
SERPINA9	278548	858	13	40092	11544	0	1	0	0	50	0	607165	0.0658317	1
MAVS	740484	241	42	48139	16094	0	1	0	0	50	1	968825	0.0659912	1
P4HA3	641945	201	37	50687	15028	0	1	0	0	50	0	758459	0.0666221	1
C19orf63	1038277	491	30	26377	9035	0	1	0	0	50	0	762606	0.0667517	1
FOXJ2	139049	167	22	53690	15145	0	1	0	0	50	0	788138	0.0679037	1
GFRA4	942842	353	32	27495	8229	0	1	0	0	50	0	777998	0.0681518	1
KIAA2018	453036	419	24	203853	59709	0	2	0	0	50	0	790010	0.0683142	1
CELF3	1210719	255	29	44564	12064	0	1	0	0	50	0	646607	0.0686934	1
CYHR1	2043455	200	36	42666	13338	0	1	0	0	50	0	618150	0.0687948	1
RFPL1	723458	203	35	29016	8346	0	1	0	0	50	0	810758	0.0689842	1
TH	837088	579	38	48867	15132	0	1	0	0	50	0	705822	0.0690048	1
MFSD8	230666	331	9	49049	13546	0	1	0	0	50	0	698880	0.0699436	1
GOLIM4	147581	681	-8	68263	15626	0	1	0	0	50	0	970385	0.070106	1
KCNA10	435777	589	29	46397	13585	0	1	0	0	50	1	872573	0.0706135	1
C16orf13	1115707	213	39	22776	4914	0	1	0	0	50	0	619684	0.0707752	1
TPRN	1722012	202	36	59332	20423	0	1	0	0	50	0	828087	0.071396	1
OIP5	897414	237	24	21138	6474	0	1	0	0	50	0	565890	0.0718852	1
BCL6B	1696302	360	24	43667	13741	0	1	0	0	50	0	593632	0.0732852	1
ICOSLG	1128093	219	76	28535	7852	0	1	0	0	50	0	748722	0.0732872	1
C12orf57	2704950	211	47	11843	3484	0	1	0	0	10	0	160004	0.0737374	1
ZNF155	498673	419	-36	51272	12415	0	1	0	0	50	0	688376	0.0741987	1
MPP3	1053443	192	27	56043	15327	0	1	0	0	50	0	749333	0.0745031	1
SGTA	1354357	291	25	30589	7865	0	1	0	0	50	0	785759	0.0747969	1
DNAH5	148607	674	-17	438256	115115	0	2	0	0	44	0	1052246	0.0755233	1
TRA2A	432206	231	23	26273	7930	0	1	0	0	50	0	666627	0.0756868	1
ZNF384	2816983	210	61	53833	15197	0	1	0	0	50	1	933335	0.0765856	1
TG	237421	677	9	258544	72878	0	2	0	0	50	1	825968	0.0769334	1
TBC1D3B	739634	565	19	51870	14469	0	1	0	0	50	1	890760	0.0772629	1
FRG1	49764	1059	-15	25792	5837	0	1	0	0	50	1	954109	0.0778187	1
SLC10A5	158801	681	12	39520	11765	0	1	0	0	50	1	669981	0.0782625	1
B3GNT6	368988	395	37	33696	11544	0	1	0	0	50	0	824551	0.0783626	1
TMEM180	871726	178	41	46566	15288	0	1	0	0	50	1	788268	0.0784344	1
C6orf10	1754032	479	27	46306	11570	0	1	0	0	50	0	583622	0.079001	1
ACSS3	26211	1037	-20	64272	18525	0	1	0	0	50	0	808639	0.0791386	1
TXNDC15	727517	696	49	33202	9659	0	1	0	0	50	0	796783	0.0798391	1
TLX3	269453	434	25	26104	8450	0	1	0	0	50	0	626223	0.0798661	1
EPB42	834640	330	43	66963	19461	0	1	0	0	50	0	825175	0.0807857	1
OR10A4	427462	681	8	28262	8866	0	1	0	0	50	0	665626	0.0812857	1
KRTAP10-8	874480	461	25	23478	7098	0	1	0	0	50	1	826683	0.0815866	1
MME	72464	650	-12	73632	17667	0	1	0	0	50	0	877500	0.0835094	1
A4GALT	808038	168	72	31447	10127	0	1	0	0	50	0	713947	0.0841881	1
DACH1	30451	1135	-22	64805	19708	0	1	0	0	50	0	762580	0.0845644	1
TAS2R3	200522	844	14	28665	8580	0	1	0	0	50	0	645892	0.0847973	1
SLC1A1	228047	813	19	48945	14196	0	1	0	0	50	1	757653	0.0855583	1
VSX2	652027	358	47	33124	9932	0	1	0	0	50	0	738205	0.0856916	1
DCAF12L1	11311	NaN	-16	41054	13390	0	1	0	0	50	0	911989	0.0859555	1
PIGW	416822	556	23	45526	13715	0	1	0	0	50	0	1009086	0.0861381	1
OR4C46	68	1239	-43	28145	8047	0	1	0	0	50	1	935298	0.0862257	1
ZNF439	739660	633	-2	47437	11375	0	1	0	0	50	2	880880	0.0862261	1
COL25A1	157338	437	-5	65650	19799	0	1	0	0	50	0	757419	0.0862345	1
NOTCH4	2119974	392	28	183066	56082	0	2	0	0	25	0	408200	0.0864166	1
EIF5AL1	342919	284	39	14222	3991	0	1	0	0	50	2	626028	0.0867924	1
SUSD4	464408	581	-4	50323	14339	0	1	0	0	50	1	764439	0.0868124	1
LASS4	826957	209	15	37050	10686	0	1	0	0	50	0	814060	0.0868601	1
AKT3	208930	954	-4	48568	11492	0	1	0	0	50	1	736684	0.0873061	1
TXNDC3	103411	646	13	57902	13507	0	1	0	0	50	0	659373	0.0873552	1
DNAJC4	1608193	179	61	22516	6656	0	1	0	0	50	1	737789	0.0873905	1
MAP3K4	80018	860	-2	151996	40313	0	2	0	0	14	0	336388	0.0875966	1
PPYR1	NaN	NaN	NaN	33683	10465	0	1	0	0	50	2	1458197	0.0881814	1
TLE1	36728	629	-33	72761	20410	0	1	0	0	50	0	820625	0.0881938	1
FAM161A	758678	249	34	62322	15873	0	1	0	0	50	0	699725	0.0885887	1
IGSF5	285788	762	-70	38415	10608	0	1	0	0	50	3	817960	0.0885913	1
RETSAT	975949	211	18	56147	16900	0	1	0	0	50	0	630331	0.0885975	1
RNF126	1832767	218	10	29068	8684	0	1	0	0	29	0	620958	0.0892208	1
DMRTA1	160489	448	-26	44356	14885	0	1	0	0	50	0	939276	0.0899684	1
XRCC6BP1	844463	298	22	23712	6045	0	1	0	0	50	1	753350	0.0900012	1
PSMB7	492165	406	37	26078	7618	0	1	0	0	50	1	828269	0.0900272	1
RAE1	181292	604	9	35984	8905	0	1	0	0	50	0	760825	0.0900997	1
C20orf177	73597	856	-36	34749	10335	0	1	0	0	50	0	734357	0.0901413	1
ACTRT2	308009	634	19	33904	10400	0	1	0	0	50	0	715520	0.0902587	1
METTL8	515299	342	49	39416	9724	0	1	0	0	50	0	811499	0.0924099	1
NHLRC1	487819	397	-1	34749	11661	0	1	0	0	50	0	713687	0.0926226	1
NUDT13	539834	354	40	33462	9087	0	1	0	0	50	0	685750	0.0928156	1
ZNF544	1471648	581	-53	67262	17134	0	1	0	0	50	0	715377	0.0934642	1
NOP58	386034	270	50	51467	12727	0	1	0	0	50	1	716053	0.093777	1
LEFTY2	923085	239	20	32760	10647	0	1	0	0	50	0	656136	0.0948603	1
C16orf7	1090549	219	38	57720	18408	0	1	0	0	50	0	604422	0.0949114	1
CCDC78	1207790	194	33	41093	12298	0	1	0	0	50	0	821951	0.094979	1
EFNA3	1696720	214	44	22178	6487	0	1	0	0	50	2	875979	0.0962236	1
DMKN	954618	367	35	54782	15730	0	1	0	0	50	1	725634	0.0967052	1
GGNBP2	468055	548	23	67106	16432	0	1	0	0	50	0	686647	0.0971048	1
HSD3B1	422140	672	7	34411	9815	0	1	0	0	50	0	672399	0.0971075	1
PTPMT1	1001413	219	34	22607	5590	0	1	0	0	50	1	661167	0.0973704	1
CREBZF	325720	554	-19	31031	10504	0	1	0	0	50	1	902915	0.0978429	1
KCNN3	1958370	559	34	67665	19851	0	1	0	0	50	0	685178	0.098111	1
ACAA1	302137	411	32	39325	12116	0	1	0	0	50	0	759499	0.0981881	1
SIX4	352813	482	5	69875	22009	0	1	0	0	50	0	705523	0.0983902	1
SCNN1D	1744013	273	28	64870	19877	0	1	0	0	50	1	832520	0.0987429	1
ZNF681	445524	1441	-58	61529	14521	0	1	0	0	50	2	972244	0.0991909	1
FAM189B	1574928	194	45	59345	20644	0	1	0	0	50	1	759395	0.0997233	1
PNPT1	501257	354	17	75647	20371	0	1	0	0	50	0	745589	0.100763	1
SLC25A12	443171	185	35	64077	18096	0	1	0	0	50	1	791765	0.101741	1
C20orf160	1022704	386	29	39481	12623	0	1	0	0	50	0	728494	0.102521	1
NUP62	1679101	205	45	45617	15730	0	2	0	0	50	2	759018	0.102627	1
C14orf4	429724	206	52	69485	23764	0	1	0	0	50	0	670345	0.102914	1
FOXA2	49625	627	-66	41938	12506	0	1	0	0	50	0	765505	0.103574	1
AKR1B1	328321	415	9	30680	7891	0	1	0	0	50	1	840307	0.103608	1
ZNF519	134820	933	-24	51623	11986	0	1	0	0	50	0	941330	0.103673	1
CA9	1202125	248	37	42133	13325	0	1	0	0	50	0	759070	0.10486	1
CHRNA1	414231	577	21	45513	12480	0	1	0	0	50	0	817583	0.105149	1
BTN2A1	384310	375	47	49725	14118	0	2	0	0	50	1	633464	0.1059	1
PHF10	233648	447	3	48230	12025	0	1	0	0	50	0	859105	0.10599	1
EPOR	1385739	197	31	45864	14781	0	1	0	0	50	0	811785	0.106626	1
OR4Q3	275024	858	-57	28275	8385	0	2	2	0	12	2	154661	0.106669	1
C16orf71	717235	194	35	47853	14508	0	1	0	0	50	0	839254	0.107552	1
EXOSC10	577167	408	34	85514	22048	0	1	0	0	50	0	787241	0.107777	1
C1orf228	NaN	NaN	NaN	41782	11531	0	1	0	0	50	2	1459263	0.108102	1
RECQL5	1912060	198	37	94822	27443	0	1	0	0	50	0	868907	0.108268	1
SYT11	2096440	179	32	39429	11583	0	1	0	0	50	0	677716	0.109613	1
ATP6V0A4	310803	385	7	80587	20930	0	1	0	0	50	0	727792	0.109832	1
SLAMF7	1188881	618	29	31421	8905	0	1	0	0	50	1	801463	0.110803	1
ANKK1	107636	610	12	69667	21125	0	1	0	0	50	1	781586	0.110865	1
HRC	2011861	267	47	67249	15509	0	1	0	0	50	1	753610	0.111052	1
SIL1	1351545	442	35	42991	12467	0	1	0	0	50	0	726674	0.111352	1
CHIA	398726	559	15	45539	12064	0	1	0	0	50	0	769639	0.111366	1
ZNF397OS	260556	599	7	47398	11687	0	1	0	0	50	0	797888	0.111782	1
SH2B3	466447	479	47	51415	17069	0	1	0	0	50	0	862030	0.112206	1
SUPT16H	713944	380	38	101790	24726	0	1	0	0	50	0	899288	0.112235	1
PSG5	307971	178	-25	31057	9035	0	1	0	0	50	1	778921	0.112576	1
INCENP	2712305	253	52	85683	24648	0	1	0	0	50	1	995839	0.11274	1
KCNIP4	35439	1264	3	28743	6864	0	1	0	0	50	1	718692	0.112899	1
HAVCR2	166999	1198	18	28223	8047	0	1	0	0	50	1	703105	0.113289	1
MRPS30	87489	1075	-7	40391	11791	0	1	0	0	50	0	669448	0.113426	1
PKD2	435445	367	21	90428	25207	0	1	0	0	50	0	789620	0.113533	1
OTUD4	192885	1089	33	99216	26832	0	1	0	0	50	0	857116	0.114737	1
SYTL3	606618	188	51	51402	14157	0	1	0	0	50	2	714766	0.11594	1
UBTF	930750	175	41	75010	17615	0	1	0	0	50	1	795821	0.116705	1
PNMA1	600464	191	47	31967	9451	0	1	0	0	50	1	762749	0.117969	1
LMOD1	743998	168	27	55185	15444	0	1	0	0	50	0	872820	0.118513	1
FAM20A	662487	313	-28	50193	14781	0	1	0	0	50	0	787254	0.119444	1
PLEKHA5	149622	577	-29	117104	29965	0	2	0	0	50	0	961493	0.120615	1
PROKR2	504598	489	14	34996	10166	0	1	0	0	50	1	810472	0.121311	1
ELN	1047492	240	54	66573	23907	0	1	0	0	50	1	702390	0.121897	1
D2HGDH	960711	380	30	47164	15314	0	1	0	0	50	0	718510	0.12274	1
ZNF746	588536	467	17	58279	18239	0	1	0	0	50	2	726843	0.122755	1
SMARCA1	278446	NaN	-7	101582	25597	0	1	0	0	50	0	759499	0.122867	1
MAML3	351118	591	8	103961	29614	0	1	0	0	50	0	765232	0.124649	1
EPHB2	568787	464	29	92170	25766	0	1	0	0	50	1	908765	0.125001	1
GNAT1	846254	199	44	33683	8593	0	1	0	0	50	1	753077	0.125367	1
UGT1A3	NaN	NaN	NaN	49127	14092	0	1	0	0	50	2	1461824	0.125631	1
ATL3	1058363	170	50	51740	13546	0	1	0	0	50	3	773695	0.125833	1
C6	252021	888	-14	89583	22464	0	1	0	0	50	0	703027	0.126083	1
FGB	59883	1034	20	47229	11505	0	1	0	0	50	0	698386	0.126198	1
FAM71A	409070	224	26	53235	16380	0	1	0	0	50	0	784693	0.126573	1
POLG	636068	420	24	115466	32890	0	1	0	0	50	0	900744	0.126825	1
MAMDC4	1921909	176	44	105131	32149	0	1	0	0	50	0	759239	0.126855	1
ASTN1	6547	940	-9	121485	33618	0	1	0	0	50	0	943878	0.127328	1
C10orf68	493605	708	-15	62127	14586	0	1	0	0	50	1	592189	0.128422	1
CCDC66	178940	477	24	92157	21762	0	1	0	0	50	0	654862	0.128755	1
POLR3B	247626	539	7	108537	28353	0	1	0	0	50	0	832780	0.1289	1
AKAP8L	509601	481	30	61854	16029	0	1	0	0	50	0	892476	0.129114	1
ARHGEF6	306872	NaN	39	74854	19331	0	1	0	0	50	1	707343	0.129383	1
LYST	438216	401	9	358306	94484	0	2	0	0	29	0	632931	0.129648	1
ZNHIT2	3267059	207	46	34684	12740	0	1	0	0	50	1	747968	0.129655	1
BMP15	15214	NaN	27	35828	10465	0	1	0	0	50	1	770666	0.129964	1
MYBPC2	1038277	491	30	108459	29445	0	1	0	0	50	0	762606	0.13001	1
TRAK2	511735	479	26	85267	23972	0	1	0	0	50	1	801294	0.130128	1
HSPA1B	2509866	183	32	57473	17641	0	1	0	0	50	0	820339	0.130419	1
MAP2K5	449735	377	31	44447	11362	0	1	0	0	50	0	624312	0.132377	1
RASGRF1	420514	488	42	120640	32630	0	1	0	0	50	0	819910	0.134124	1
ZNF467	471461	615	29	53729	16627	0	1	0	0	50	0	741793	0.134511	1
RIC3	244487	555	19	34658	9373	0	1	0	0	50	1	718003	0.134581	1
AHDC1	738004	217	25	138814	49166	0	1	0	0	50	0	939055	0.134696	1
VPS36	365031	318	37	37713	9672	0	1	0	0	50	1	776698	0.13532	1
TPTE	30271	1268	-81	54145	13715	0	1	0	0	50	1	484900	0.135597	1
SPATA1	241849	585	-1	44720	11050	0	1	0	0	50	0	611351	0.135746	1
TRIM41	1034999	415	35	60736	17615	0	1	0	0	50	1	543777	0.136022	1
MPRIP	783403	214	11	99333	27261	0	1	0	0	50	1	887900	0.136066	1
PCDH12	696239	321	48	105612	33501	0	1	0	0	50	0	701636	0.136943	1
RELB	1135715	208	25	52364	16900	0	1	0	0	50	0	702221	0.138183	1
SPNS2	1252775	318	22	49842	16380	0	1	0	0	50	0	666796	0.13849	1
IGSF3	691376	359	23	111488	32227	0	3	1	0	50	1	954122	0.141003	1
IMPDH1	902782	246	34	56498	16822	0	1	0	0	50	0	740649	0.141113	1
CDC7	269978	454	-6	54990	14157	0	1	0	0	50	0	717834	0.141665	1
FBXW10	752804	391	-6	98943	26247	0	1	0	0	50	0	629265	0.142505	1
PDE6B	639827	489	12	82186	21203	0	1	0	0	50	1	693017	0.14359	1
MAPT	369065	469	19	71071	22022	0	1	0	0	50	0	912691	0.14382	1
TMPRSS6	699535	379	44	75777	21879	0	1	0	0	50	0	971230	0.144079	1
CNGB1	822498	125	10	119717	32851	0	1	0	0	50	0	750958	0.144305	1
KLHL11	1857838	191	33	64792	18395	0	1	0	0	50	0	826696	0.144679	1
CASS4	254881	551	-25	71539	21320	0	1	0	0	50	0	912379	0.144738	1
OAS2	605960	433	54	70265	18733	0	1	0	0	50	0	894712	0.144949	1
ZNF609	841050	278	43	129025	37427	0	1	0	0	50	0	803569	0.145248	1
USP6	1391000	384	20	133978	35126	0	1	0	0	50	0	833963	0.14532	1
WIPF1	463489	400	39	44395	15665	0	1	0	0	50	1	837564	0.14674	1
FLII	925111	223	18	120068	33124	0	1	0	0	50	0	733915	0.14774	1
TTLL6	727820	415	24	87126	22737	0	1	0	0	50	0	1081483	0.148389	1
CYP2D6	1296288	363	43	45188	14482	0	1	0	0	50	1	835848	0.149432	1
BRPF3	821543	358	31	110656	32318	0	1	0	0	50	0	667446	0.149534	1
MPHOSPH8	306203	602	18	82225	20618	0	1	0	0	50	0	1010698	0.149731	1
HIC1	1415256	294	27	64064	21970	0	1	0	0	50	0	786461	0.149906	1
ALPK1	185655	467	42	116662	31343	0	1	0	0	50	1	932581	0.1501	1
FAM120C	610328	NaN	28	100672	30875	0	1	0	0	50	0	601796	0.150756	1
CDH18	4731	1195	-17	74464	19643	0	1	0	0	50	0	907634	0.150891	1
NES	1851672	180	37	145132	45110	0	1	0	0	50	0	857246	0.152399	1
VWDE	NaN	NaN	NaN	152100	38415	0	1	0	0	50	2	1486147	0.153736	1
ANKRD26	390573	459	24	166452	38883	0	1	0	0	50	0	972088	0.153971	1
MARCH7	363925	374	28	65611	18278	0	1	0	0	50	0	781287	0.154152	1
DYNC1LI2	804191	145	10	46683	12948	0	1	0	0	50	1	817310	0.15716	1
ZNF479	13773	995	-29	49907	12142	0	1	0	0	50	1	873691	0.15717	1
ZNF654	123235	894	-3	54717	13533	0	1	0	0	50	0	631215	0.15869	1
DAGLB	NaN	NaN	NaN	63661	17264	0	1	0	0	50	2	1464996	0.159307	1
BTBD18	NaN	NaN	NaN	63882	19851	0	1	0	0	50	2	1467583	0.159555	1
F10	774267	229	26	46397	12064	0	1	0	0	50	1	798512	0.15964	1
P2RX3	923815	191	-3	38324	10114	0	1	0	0	50	1	655876	0.160461	1
BEST1	2389859	185	53	62439	17589	0	1	0	0	50	0	710814	0.16062	1
NOC4L	608356	528	26	48321	14508	0	1	0	0	50	1	824876	0.160832	1
NUP85	1723762	171	31	62920	16835	0	1	0	0	50	0	714181	0.161052	1
LOR	836876	556	24	26741	10036	0	1	1	0	10	1	196430	0.162132	1
ZNF180	743733	511	-55	65754	15951	0	1	0	0	50	1	1105143	0.163131	1
FLT4	855370	515	13	128102	36322	0	1	0	0	50	0	698087	0.163887	1
CDH5	479049	262	-20	72761	20800	0	1	0	0	50	0	808860	0.164137	1
SLAIN2	310987	328	55	53105	16081	0	1	0	0	50	0	589693	0.164303	1
TPCN1	429315	206	36	85046	23335	0	1	1	0	50	2	765271	0.165129	1
NDOR1	1724821	399	43	55770	17277	0	1	0	0	50	0	607516	0.167194	1
ZFYVE20	564079	395	44	73346	20059	0	1	0	0	50	0	793715	0.1682	1
MTHFSD	70370	416	3	39013	11765	0	1	0	0	50	1	632957	0.168456	1
CD44	685695	222	28	72670	16913	0	1	0	0	50	2	639704	0.168476	1
CATSPER1	3854361	208	57	73281	19812	0	1	0	0	50	0	789542	0.16887	1
SOX17	240943	554	-8	36855	11856	0	1	0	0	50	2	795249	0.168934	1
LRRN1	61807	888	-18	65559	18330	0	1	0	0	50	0	703872	0.169408	1
SETD1B	NaN	NaN	NaN	172432	55250	0	1	0	0	50	2	1502982	0.170002	1
SLITRK3	26494	1315	-17	88088	26494	0	1	0	0	50	0	934388	0.171275	1
GPR128	342000	509	12	75088	20618	0	1	0	0	50	0	795626	0.171443	1
IQGAP3	2095354	166	39	152971	43823	0	1	0	0	50	0	791206	0.171742	1
ZNF780B	1181917	521	22	79274	18928	0	1	0	0	50	0	836940	0.172007	1
PDZRN3	82249	888	-7	98371	27950	0	1	0	0	50	0	1038115	0.172073	1
PDLIM3	168463	422	4	39754	11531	0	1	0	0	50	1	627835	0.172624	1
SLC5A5	1291250	204	37	58305	19227	0	1	0	0	50	0	613067	0.17264	1
ALDH8A1	152922	364	19	45227	12883	0	1	0	0	50	1	713635	0.172763	1
SLC9A5	1155617	142	51	82082	25285	0	1	0	0	50	2	700479	0.173677	1
GABRR2	415409	541	41	46527	12246	0	1	0	0	50	1	727571	0.174177	1
YEATS2	1447754	410	26	132002	39169	0	1	0	0	50	0	671502	0.17431	1
NEK9	919043	222	47	92001	25935	0	1	0	0	50	0	948753	0.1757	1
C7orf27	783535	226	47	73645	24557	0	1	0	0	50	0	759447	0.175702	1
INPP5J	731144	218	40	59319	17394	0	1	0	0	50	1	917397	0.17593	1
WNT1	1737773	214	55	33124	10751	0	1	0	0	50	2	678223	0.177158	1
SEMG2	842540	324	25	54990	13611	0	1	0	0	50	1	833053	0.179244	1
CDH17	474043	543	18	78650	21463	0	1	0	0	50	0	788775	0.180173	1
RASAL1	518680	387	34	74945	22360	0	1	0	0	50	0	748839	0.180775	1
RGS7	134467	834	-27	48386	11362	0	1	0	0	50	1	720915	0.181952	1
KIF1A	1094176	446	29	159692	45331	0	1	0	0	50	0	774124	0.181962	1
CNTN5	3647	1135	-26	103493	28912	0	1	0	0	50	0	1021735	0.18274	1
UNC5A	1056724	222	44	77402	23413	0	1	0	0	46	0	748657	0.186132	1
ITIH3	1193949	272	49	85085	22516	0	1	0	0	50	0	822081	0.186313	1
TRPC5	113544	NaN	10	90896	24622	0	1	0	0	50	0	878046	0.186347	1
PANX2	944000	242	49	60047	19591	0	1	0	0	50	1	865852	0.187385	1
KIF12	244063	558	0	47502	14820	0	1	0	0	50	1	681005	0.18836	1
CTBP2	283236	508	20	89583	29484	0	1	0	0	50	0	830141	0.193406	1
GRIK3	361850	626	30	85709	24271	0	1	0	0	50	0	794209	0.193413	1
ANO10	106227	518	29	62946	16263	0	1	0	0	50	1	875823	0.193473	1
JHDM1D	462584	624	29	90259	22997	0	1	0	0	50	0	824369	0.195923	1
FRMPD4	191024	NaN	22	122369	34918	0	1	0	0	50	1	1667900	0.197066	1
GRIN2D	1448469	209	38	117858	40443	0	1	0	0	50	0	1068639	0.197196	1
PYHIN1	97254	914	6	47372	12688	0	1	0	0	50	1	641316	0.198262	1
DRD4	1774224	236	57	36218	13468	0	1	0	0	50	2	652470	0.198735	1
LMNB1	237464	579	37	55159	15080	0	1	0	0	50	1	742261	0.199326	1
SPHK2	1597109	242	31	56394	21021	0	1	0	0	50	1	758875	0.199327	1
KLHL5	497247	209	46	70798	19214	0	1	0	0	50	0	634023	0.199385	1
PLEKHM2	683349	174	22	94965	27339	0	1	0	0	50	0	849173	0.199651	1
HCN1	80822	1235	-24	81549	23868	0	1	0	0	50	0	727740	0.200009	1
TGM6	611435	477	30	65754	18915	0	1	0	0	50	1	880295	0.200241	1
CDC40	132627	636	19	56316	13806	0	1	0	0	50	1	753337	0.200384	1
GAS2L1	849693	251	36	59475	21216	0	1	0	0	50	1	789230	0.201821	1
HS3ST3B1	92906	944	-54	34697	11206	0	1	0	0	50	2	607815	0.203748	1
PIGQ	1115707	213	39	71279	21736	0	1	0	0	50	0	619684	0.204701	1
RERE	916698	436	27	143260	43355	0	1	0	0	50	1	808613	0.205508	1
CDH3	777628	299	24	77077	22373	0	1	1	0	50	1	1002118	0.205516	1
CD93	199022	554	-50	57928	18629	0	1	0	0	50	1	751855	0.20583	1
ADAMTSL2	1869593	315	35	89414	24622	0	1	0	0	50	0	770224	0.206376	1
NLRP11	991833	362	-35	96330	26052	0	1	0	0	50	0	826826	0.207033	1
DCST2	1654795	214	40	71188	21788	0	1	0	0	50	1	904254	0.209796	1
ZNF117	216422	994	-9	46124	10816	0	1	0	0	50	2	778895	0.210481	1
MMP11	637355	196	52	44629	13754	0	1	0	0	50	2	749385	0.211539	1
DLGAP1	368461	215	24	91845	26208	0	1	0	0	50	0	765115	0.212569	1
ZNF804A	18097	1171	4	112463	29575	0	2	0	0	34	0	514020	0.212629	1
NNT	439246	597	0	99918	30537	0	1	0	0	50	0	831480	0.212769	1
C3	740979	259	28	157586	43498	0	1	0	0	50	1	855348	0.21278	1
TRIM36	219228	619	-1	76921	19448	0	1	0	0	50	0	638599	0.213211	1
C17orf70	3665223	205	12	77740	26780	0	1	0	0	50	0	643175	0.21386	1
PDHA1	216523	NaN	39	41353	11375	0	1	0	0	50	2	681824	0.214974	1
EPHA3	27204	NaN	-18	93574	24986	0	1	0	0	50	0	769314	0.21505	1
RHOBTB3	310056	242	46	58474	14846	0	1	0	0	50	1	720837	0.215417	1
BIRC2	463959	312	15	58578	14937	0	1	0	0	50	1	717236	0.216707	1
GIGYF2	325071	328	35	127049	32071	0	1	0	0	50	1	669604	0.2184	1
ANKMY1	452566	485	21	96018	27261	0	1	0	0	50	0	771199	0.219503	1
CTNNA2	10595	1614	-24	78650	21892	0	1	0	0	50	0	631280	0.219632	1
MYO1H	438867	470	39	98943	25428	0	1	0	0	50	0	793949	0.219683	1
TMC8	527017	217	27	65715	21684	0	1	0	0	50	1	782704	0.22203	1
LRDD	1793686	176	50	80691	28392	0	1	0	0	50	0	636948	0.222865	1
CACNA1A	1604988	497	12	237146	67795	0	1	0	0	50	0	906113	0.224252	1
PJA1	136194	NaN	39	58825	16523	0	1	0	0	50	1	688532	0.225446	1
MTBP	193807	877	-3	87178	22139	0	1	0	0	50	0	669864	0.22817	1
PTBP1	2041736	198	25	52364	15106	0	1	0	0	50	2	804869	0.22863	1
EFTUD1	373597	701	13	106210	27911	0	1	0	0	50	0	813592	0.228784	1
SLC9A11	426813	335	9	108979	26858	0	1	0	0	50	0	830934	0.229712	1
STAT2	2869106	184	52	81185	22087	0	1	0	0	50	1	925236	0.230759	1
GPR156	429121	146	19	74321	22282	0	1	0	0	50	1	846027	0.230992	1
GPRASP2	123687	NaN	23	76726	21437	0	1	0	0	50	0	580177	0.231377	1
MYO1F	674374	214	-7	104221	28574	0	1	0	0	50	0	778947	0.233735	1
B4GALNT4	1454043	344	48	94939	29783	0	1	0	0	50	1	1063348	0.234276	1
PRDM10	631721	248	1	109993	30290	0	1	0	0	50	3	802074	0.235999	1
KIR2DL1	NaN	NaN	NaN	32760	9243	0	1	1	0	28	2	485147	0.236166	1
IRS1	146164	493	-3	110409	35256	0	1	0	0	50	0	812929	0.236791	1
FAM184B	NaN	NaN	NaN	100087	26702	0	1	0	0	50	2	1474434	0.237246	1
MAST3	1249693	226	42	119405	37921	0	1	0	0	50	0	872118	0.238447	1
ENPEP	81828	684	-3	91156	23894	0	1	0	0	50	0	661193	0.23988	1
KLHL17	1911331	239	9	58435	18512	0	1	0	0	29	1	636025	0.240167	1
CCDC114	1265470	217	34	62829	17706	0	1	0	0	50	1	678899	0.241682	1
EIF3D	1184089	359	38	53391	13026	0	1	0	0	50	2	768677	0.242016	1
VPS16	766497	396	44	79716	22308	0	1	0	0	50	1	858078	0.242484	1
NUP133	249616	277	25	109577	29770	0	1	0	0	50	0	780390	0.243702	1
PCIF1	725555	209	59	66131	18694	0	1	0	0	50	1	707252	0.243844	1
LIPE	704668	235	34	95849	31564	0	1	0	0	50	0	679965	0.244523	1
SEL1L	192523	330	-11	76323	19812	0	1	0	0	50	1	807612	0.246094	1
IFI16	97615	866	7	69069	17901	0	1	0	0	50	1	727545	0.247059	1
NDST1	1109777	188	60	81744	23595	0	1	0	0	50	1	856375	0.248222	1
DGKA	2080397	229	31	71149	18551	0	1	0	0	50	1	741000	0.249484	1
WDR35	482678	390	24	113711	28795	0	1	0	0	50	0	785356	0.250221	1
C20orf194	1015129	338	40	114218	29302	0	1	0	0	50	0	779675	0.252746	1
LEPREL2	2822601	232	32	66833	21619	0	1	0	0	31	0	449709	0.255871	1
RGS22	290819	449	22	122668	29549	0	1	0	0	50	0	819481	0.257453	1
ADAMTS1	33367	441	-72	89167	25337	0	1	0	0	50	0	586261	0.260974	1
RPS6KC1	226813	600	0	100425	26598	0	1	0	0	50	0	659711	0.261166	1
DGKH	191275	407	57	116753	30706	0	1	0	0	50	0	765492	0.261596	1
ANGEL1	308800	471	39	61880	18031	0	1	0	0	50	1	606424	0.262823	1
THBS1	467443	433	-5	111514	28769	0	1	0	0	50	0	725816	0.263228	1
ATP8B3	2180359	206	29	123643	34658	0	1	0	0	50	0	804427	0.263321	1
SLCO1B1	518292	799	-25	65780	17368	0	1	0	0	50	1	620672	0.271419	1
EP400	408569	269	27	286377	87126	0	1	0	0	45	0	865202	0.27406	1
TBL3	1747301	183	46	75088	22997	0	1	0	0	50	1	698841	0.274587	1
RTN1	298900	639	-2	72397	22295	0	1	0	0	50	1	658515	0.279948	1
CLK1	635570	201	31	51571	11960	0	1	0	0	50	2	625053	0.280345	1
STARD13	157153	583	41	107978	30199	0	1	0	0	50	0	650637	0.280942	1
HIPK1	350373	545	10	113906	34177	0	1	0	0	50	0	685880	0.281106	1
ASAP1	264818	427	30	107302	29354	0	1	0	0	50	1	966511	0.282258	1
ZNF429	164342	1162	-59	63765	15678	0	1	0	0	50	1	574197	0.282324	1
ZNF541	NaN	NaN	NaN	124436	37570	0	1	0	0	50	2	1485302	0.283973	1
VLDLR	192846	541	-1	84383	20683	0	1	1	0	50	1	754130	0.284123	1
CDK2AP2	1392213	215	53	11622	3705	0	2	1	0	5	1	54093	0.285494	1
CAMTA2	1416161	231	30	115544	34879	0	1	0	0	50	0	682175	0.285779	1
ZNF445	366436	418	42	96447	25077	0	1	0	0	50	1	846989	0.288318	1
ERBB4	20702	1173	-5	124735	32708	0	1	0	0	50	0	720278	0.291117	1
COL28A1	220971	682	6	106470	30654	0	1	0	0	50	1	912691	0.294186	1
ZNF536	106911	926	-73	118391	34450	0	1	0	0	50	0	674999	0.294214	1
COL5A1	229207	421	31	171301	54002	0	1	0	0	50	0	976352	0.294291	1
RBM33	213580	646	10	108316	31343	0	1	0	0	50	1	925925	0.294871	1
PTCHD2	759100	482	25	126607	39494	0	1	0	0	50	0	715338	0.296431	1
AKNA	218424	360	14	130468	41132	0	1	0	0	50	0	733577	0.297628	1
EHBP1L1	3945819	202	45	136942	44174	0	1	0	0	50	0	757198	0.301775	1
TRIM33	727314	264	13	105989	29029	0	1	0	0	50	1	874159	0.303756	1
ZNF226	554986	634	-28	78091	18785	0	1	0	0	50	1	643110	0.304129	1
SMO	811174	420	54	71695	22217	0	1	0	0	50	2	785044	0.305128	1
ZFYVE16	318922	590	33	144846	37986	0	1	0	0	50	0	782444	0.307625	1
SFRS14	1327004	215	24	99710	28483	0	1	0	0	50	1	809393	0.307767	1
SCUBE1	473937	440	30	94484	24583	0	1	0	0	50	1	763061	0.309065	1
DLGAP4	874457	360	46	94289	28171	0	1	0	0	50	2	1007188	0.311419	1
LRRC36	1158788	125	49	71188	20267	0	1	0	0	50	2	689065	0.313525	1
MYST4	246599	335	42	193869	51129	0	1	0	0	50	1	671489	0.314236	1
BTAF1	366076	306	22	175370	46930	0	1	0	0	50	0	920699	0.314897	1
ZNF836	460879	901	-41	88010	22009	0	1	0	0	50	1	682630	0.319466	1
SIN3B	854784	305	35	108797	30316	0	1	0	0	50	1	839917	0.320688	1
TMTC4	123356	622	28	71331	20358	0	1	0	0	50	2	728624	0.323028	1
ROR2	457045	572	30	85995	25701	0	1	0	0	50	1	657657	0.323159	1
SAPS1	1035412	209	5	82888	23894	0	1	1	0	50	1	628082	0.325588	1
RREB1	664661	310	35	157573	47918	0	1	0	0	50	0	793130	0.325874	1
LMTK2	457962	375	19	138359	39637	0	1	0	0	50	0	691886	0.3276	1
BAT2	2517260	193	28	192114	65052	0	1	0	0	50	0	960128	0.327757	1
RACGAP1	1018478	211	52	60021	16536	0	1	0	0	50	2	601770	0.327962	1
UNC80	NaN	NaN	NaN	305630	85579	0	4	1	0	50	3	1533311	0.329011	1
CLMN	207561	612	30	93964	25259	0	1	0	0	50	1	695435	0.331858	1
SCAPER	393531	675	22	135135	34944	0	1	0	0	50	1	981955	0.336804	1
CARD11	635400	558	24	108927	29796	0	1	0	0	50	1	776815	0.341911	1
RELN	291011	954	7	328978	85943	0	1	0	0	50	0	754520	0.343904	1
NCOA6	1006385	170	47	187642	55874	0	1	0	0	50	2	734331	0.345468	1
PHLDB1	1404506	161	46	124800	39858	0	1	1	0	50	1	858988	0.351727	1
PLEKHG3	608112	186	46	106548	31824	0	1	0	0	50	1	731848	0.352305	1
HTT	661693	464	41	293423	84604	0	2	0	0	17	0	363168	0.355203	1
YTHDC2	171693	686	10	135694	36413	0	1	0	0	50	1	922311	0.35525	1
PTPN14	464456	404	-8	111007	30641	0	1	0	0	50	1	751842	0.356249	1
ZDBF2	328087	597	18	218933	57070	0	1	0	0	50	0	977158	0.358716	1
GRIP1	228672	944	-6	100880	28717	0	1	0	0	50	1	675610	0.35943	1
KIAA0556	349212	620	12	151177	42536	0	1	0	0	50	0	660647	0.364715	1
SPEN	823686	169	28	329628	101361	0	1	0	0	50	0	696631	0.367148	1
KIAA1797	125322	525	20	170144	47398	0	1	0	0	50	0	729742	0.370091	1
MICAL3	415161	288	11	207805	59969	0	1	0	0	50	3	889811	0.372617	1
PSD	975992	178	39	92222	30199	0	1	0	0	22	0	384566	0.378267	1
FAM13B	992763	396	39	91806	22347	0	1	1	0	50	1	569738	0.381489	1
COL27A1	224550	425	3	170638	56420	0	1	0	0	50	0	697567	0.384113	1
CDC27	955548	395	18	79248	20787	0	4	4	0	2	4	38948	0.387495	1
ANAPC1	NaN	NaN	NaN	184743	50154	0	1	0	0	50	2	1497886	0.387997	1
EML6	NaN	NaN	NaN	185406	50115	0	1	0	0	50	2	1497847	0.389077	1
SPTBN5	874211	259	40	335140	101036	0	1	0	0	50	1	892606	0.390853	1
GON4L	2156898	179	33	212888	58708	0	1	0	0	50	0	839293	0.394933	1
CACNA1B	286606	675	29	216814	63986	0	1	0	0	50	0	852943	0.395578	1
WDR33	605495	187	43	136877	38701	0	1	0	0	50	1	804921	0.397605	1
PLEKHH1	483892	311	46	126945	37128	0	1	0	0	50	1	742950	0.399059	1
PLEC	2478735	247	25	439621	140621	0	2	0	0	42	0	998504	0.400226	1
FREM3	NaN	NaN	NaN	193492	57980	0	1	0	0	50	2	1505712	0.400403	1
KDM5C	877207	NaN	80	146692	43589	0	1	0	0	50	1	826683	0.410652	1
SI	13371	1355	-23	176644	44486	0	1	0	0	50	0	657982	0.412252	1
PTPRQ	NaN	NaN	NaN	201799	53573	0	1	0	0	50	2	1501305	0.414273	1
ZNF407	190381	1127	23	211588	57629	0	1	0	0	50	0	778024	0.41626	1
TRIO	518529	557	29	291811	79469	0	2	0	0	29	1	452686	0.416766	1
ATP13A5	141358	851	1	116272	30797	0	1	0	0	35	1	642252	0.416882	1
DFNB31	260520	290	19	80262	27690	0	1	0	0	18	0	289042	0.422771	1
ZFHX3	122465	495	-11	337207	97565	0	1	0	0	47	1	807794	0.425658	1
KNTC1	917926	215	37	213967	54431	0	1	0	0	49	0	744627	0.433589	1
MED23	147816	864	7	131131	34463	0	1	0	0	30	0	454688	0.434751	1
ATG2A	3218288	209	61	176774	56329	0	1	0	0	50	1	914771	0.437557	1
TCF20	1257937	305	43	178685	52156	0	1	0	0	50	1	901537	0.445736	1
TCOF1	949599	212	40	137267	41899	0	1	0	0	50	2	877630	0.463072	1
CEP250	1521661	167	53	226616	64090	0	1	0	0	50	0	713739	0.466011	1
SNED1	1332160	278	33	132483	37752	0	1	0	0	50	2	837772	0.466733	1
ARID1A	975965	182	27	207974	62452	0	1	0	0	37	0	641810	0.472781	1
C11orf30	268174	391	43	121251	36660	0	1	1	0	50	2	750607	0.473849	1
CHD6	378513	502	-1	254956	68432	0	1	0	0	50	0	781534	0.475021	1
ABCA4	512482	370	-2	213980	59722	0	1	0	0	50	0	618215	0.494999	1
KIAA0430	538786	282	29	162838	45266	0	1	0	0	50	1	706589	0.496067	1
AOX1	572062	160	23	127699	34346	0	1	0	0	50	2	730301	0.500811	1
MYH15	257473	874	3	187343	46930	0	1	0	0	50	1	767143	0.516077	1
RGNEF	279980	577	39	164320	43940	0	1	0	0	50	1	670462	0.517324	1
PCNXL2	146659	581	-1	198991	56303	0	1	0	0	29	0	491127	0.549759	1
NUP153	474858	267	12	135486	40482	0	1	2	0	50	4	875628	0.564556	1
MLL	1338034	192	49	363012	107016	0	1	0	0	50	0	847977	0.569319	1
DSCAML1	413931	624	44	194207	58201	0	1	1	0	50	1	675974	0.573657	1
DMXL2	380843	422	11	285025	76973	0	1	0	0	50	1	958178	0.586186	1
DOCK11	207684	NaN	38	200759	50089	0	1	0	0	50	1	674544	0.586376	1
TTC3	351773	343	47	195520	48542	0	1	0	0	50	1	635648	0.598291	1
PLCE1	299843	633	2	225719	59722	0	1	1	0	50	1	690365	0.620437	1
SRCAP	1632278	158	61	284323	98540	0	1	0	0	50	1	859820	0.624548	1
EML4	251363	292	17	93470	24856	0	1	0	0	15	0	185861	0.627245	1
ZFHX4	72333	731	8	332423	92326	0	1	0	0	50	1	985907	0.631616	1
CSMD1	10896	1290	-36	330668	89908	0	1	1	0	50	1	945191	0.645006	1
FNDC1	805575	596	23	170261	54886	0	1	0	0	10	0	308412	0.660849	1
LAMA5	1090360	252	21	339807	105027	0	1	0	0	8	0	301457	0.676411	1
HYDIN	592186	723	1	480896	132067	0	4	2	0	50	3	883558	0.710329	1
NOTCH1	1489379	212	43	237146	67054	0	1	0	0	19	0	373061	0.710975	1
ASCC3	103404	825	2	212030	55900	0	1	0	0	18	0	297336	0.750539	1
CDH23	641879	524	41	322634	96733	0	2	0	0	13	0	291668	0.758386	1
ACACA	526151	346	13	227422	62231	0	1	0	0	4	0	133445	0.777321	1
DNAH10	1032254	482	39	422227	113087	0	2	0	0	10	0	356044	0.784358	1
RYR3	140241	806	-13	463476	122577	0	1	0	0	31	0	537433	0.811748	1
USP42	1663156	229	43	78988	21437	0	1	1	0	8	1	130000	0.831611	1
ALMS1	777501	590	22	381342	109746	0	1	0	0	16	0	409292	0.834647	1
BSN	1657622	271	40	345124	115895	0	1	1	0	40	2	734396	0.842226	1
PCLO	42656	1075	-27	468403	137657	0	1	0	0	18	0	463359	0.8573	1
MYH11	435762	283	29	190437	49062	0	1	0	0	4	0	86645	0.859927	1
PKD1	1696923	224	41	381056	129532	0	1	0	0	13	0	342030	0.882091	1
HUWE1	888642	NaN	47	407368	117143	0	1	0	0	14	0	312377	0.916716	1
USH2A	82180	967	-25	485160	134979	0	1	0	0	1	0	144417	0.939913	1
PKHD1L1	134643	732	6	399594	108966	0	1	0	0	13	0	267488	0.94088	1
MEGF8	792230	218	42	251173	80210	0	1	0	0	7	0	131404	0.97175	1
REV3L	343769	434	41	292695	78468	0	1	0	0	3	0	123019	0.987346	1
HERC1	706823	369	40	451347	129519	0	1	0	0	4	0	186654	0.98815	1
MUC5B	1400716	311	46	505440	176748	0	1	0	0	2	0	194909	0.991165	1
PLXNB1	1401411	263	32	193544	61984	0	1	0	0	1	0	73658	0.991656	1
TTN	172693	713	23	3385902	960531	0	2	0	0	0	0	960531	0.992629	1
DNAH9	42730	859	-75	419978	115687	0	1	0	0	3	0	143026	0.994983	1
ASPM	221779	614	-25	326092	85046	0	1	0	0	1	0	106795	0.995853	1
AKAP13	230754	454	17	264277	73307	0	1	1	0	5	1	125814	0.995969	1
MDN1	372470	603	34	528411	142194	0	1	0	0	2	0	169897	0.996216	1
DNAH17	999172	188	25	419224	115427	0	1	0	0	2	0	129636	0.996898	1
CACNA1I	725838	466	60	203775	62049	0	1	0	0	0	0	62049	0.997138	1
MUC16	551668	537	-61	1276665	433797	0	2	1	0	0	1	433797	0.998157	1
A1BG	1621097	406	-25	44694	14508	0	0	0	0	50	0	725946	1	1
A1CF	113129	613	19	59592	16770	0	0	1	0	50	1	734695	1	1
A2BP1	2474	1138	-47	44382	11739	0	0	0	0	50	0	802061	1	1
A2LD1	NaN	NaN	NaN	13546	4628	0	0	0	0	50	2	1492231	1	1
A2M	348389	364	17	139061	38974	0	0	0	0	50	2	957814	1	1
A4GNT	190056	464	9	31525	8684	0	0	0	0	50	1	815165	1	1
AAAS	1701810	166	58	50661	15756	0	0	0	0	50	2	754182	1	1
AACS	894670	306	13	64480	16913	0	0	0	0	50	0	717470	1	1
AADAC	200470	526	2	37154	10348	0	0	0	0	50	1	863980	1	1
AADACL2	91028	611	-5	37453	10205	0	0	0	0	50	0	831922	1	1
AADACL3	145424	454	23	32695	9074	0	0	0	0	50	0	717951	1	1
AADACL4	145424	454	23	37193	11011	0	0	0	0	50	0	717951	1	1
AADAT	132912	831	-13	41405	10465	0	0	0	0	50	1	907478	1	1
AAGAB	312039	320	45	30511	7865	0	0	0	0	50	0	815477	1	1
AAK1	639466	309	35	89908	25766	0	0	0	0	50	0	898001	1	1
AAMP	730654	197	33	41028	11505	0	0	0	0	50	0	675896	1	1
AANAT	1202221	197	29	22828	7241	0	0	0	0	50	0	757666	1	1
AARS	1335968	139	42	90831	25662	0	0	0	0	50	1	823069	1	1
AARS2	1037256	312	54	89700	29016	0	0	0	0	50	0	721903	1	1
AARSD1	1507064	201	26	57473	15457	0	0	0	0	50	0	643357	1	1
AASDH	639545	594	5	102609	28158	0	0	0	0	50	0	963963	1	1
AASDHPPT	86519	753	-16	29484	7566	0	0	0	0	50	0	857688	1	1
AASS	57655	988	-13	88296	23751	0	0	0	0	45	0	839709	1	1
AATF	668463	384	16	53716	13637	0	0	0	0	50	0	746122	1	1
AATK	1737949	243	22	122434	40547	0	0	0	0	50	1	880087	1	1
ABAT	402778	358	-10	48360	12597	0	0	0	0	50	1	763503	1	1
ABCA1	195112	637	-18	213772	58526	0	0	0	0	50	0	892723	1	1
ABCA10	137274	415	-43	148850	37414	0	0	0	0	50	0	813384	1	1
ABCA12	526764	857	9	246922	66053	0	0	0	0	10	0	266877	1	1
ABCA13	93300	878	-11	470275	124553	0	0	0	0	26	0	698334	1	1
ABCA2	1951939	202	40	228800	70096	0	0	0	0	50	0	781183	1	1
ABCA3	2220466	233	46	157586	46579	0	0	0	0	50	1	806156	1	1
ABCA5	52620	314	-50	158301	39858	0	0	0	0	50	0	815880	1	1
ABCA6	240031	493	-39	155675	39559	0	0	0	0	50	0	730704	1	1
ABCA7	2387949	206	26	194350	63869	0	0	0	0	50	0	1183078	1	1
ABCA8	295848	637	-41	151125	39741	0	0	1	0	50	1	781222	1	1
ABCA9	263023	602	-42	155207	40846	0	0	0	0	50	1	798369	1	1
ABCB1	287293	822	0	120523	33566	0	0	0	0	50	0	721747	1	1
ABCB10	255826	277	20	66378	22035	0	0	0	0	16	0	270634	1	1
ABCB11	223582	560	1	124605	34281	0	0	0	0	50	1	747526	1	1
ABCB4	225315	837	8	121121	33748	0	0	0	0	50	0	712400	1	1
ABCB5	164218	648	4	120042	32799	0	0	0	0	5	0	90220	1	1
ABCB6	773232	177	36	77311	24128	0	0	0	0	50	0	729027	1	1
ABCB7	183021	NaN	-5	70681	20033	0	0	0	0	50	0	710580	1	1
ABCB8	622098	373	41	64922	21619	0	0	0	0	50	0	918060	1	1
ABCB9	1093113	196	47	69706	21749	0	0	0	0	50	2	843349	1	1
ABCC1	409366	264	33	142870	41054	0	0	0	0	50	0	671359	1	1
ABCC10	1270265	230	49	129870	44499	0	0	0	0	50	0	872807	1	1
ABCC11	216539	578	-22	129506	36829	0	0	0	0	50	1	930696	1	1
ABCC12	229669	628	-27	127608	35880	0	0	0	0	50	1	992771	1	1
ABCC2	1035115	171	30	144807	40911	0	0	0	0	50	0	693667	1	1
ABCC3	1585602	196	18	142779	43953	0	0	0	0	50	0	886860	1	1
ABCC4	200377	596	30	126594	35061	0	0	0	0	50	0	742677	1	1
ABCC5	1425631	375	43	135564	38844	0	0	0	0	50	0	980603	1	1
ABCC6	385823	188	23	139321	44486	0	0	0	0	50	1	805051	1	1
ABCC8	454503	598	14	147498	43524	0	0	0	0	50	0	751933	1	1
ABCC9	529911	984	-17	151164	41496	0	0	0	0	50	0	640003	1	1
ABCD1	1910154	NaN	37	66807	21879	0	0	0	0	50	0	829439	1	1
ABCD2	70113	596	-16	68978	19123	0	0	0	0	50	0	823953	1	1
ABCD3	459824	348	-8	64896	16965	0	0	1	0	50	1	831636	1	1
ABCD4	652027	358	47	57707	16120	0	0	0	0	50	0	738205	1	1
ABCE1	189309	1139	32	58214	14755	0	0	0	0	50	0	752375	1	1
ABCF1	2080582	271	32	81783	21021	0	0	0	0	50	1	789958	1	1
ABCF2	610106	290	32	60619	16094	0	0	0	0	50	1	846105	1	1
ABCF3	1460188	257	49	67093	19097	0	0	0	0	50	0	756808	1	1
ABCG1	289449	464	75	68367	19890	0	0	0	0	50	1	627055	1	1
ABCG2	432576	209	-7	62153	16939	0	0	0	0	50	0	782574	1	1
ABCG4	1258103	195	57	60060	17823	0	0	0	0	50	1	857519	1	1
ABCG5	544941	480	35	60242	17914	0	0	0	0	50	0	898430	1	1
ABCG8	501561	480	30	62894	17914	0	0	0	0	50	0	894140	1	1
ABHD1	1214097	238	50	37453	11453	0	0	0	0	50	0	830505	1	1
ABHD10	239044	250	10	28483	8138	0	0	0	0	50	0	770445	1	1
ABHD11	1082063	214	54	36842	11557	0	0	0	0	50	2	904865	1	1
ABHD12	608597	348	-3	39897	10998	0	0	0	0	50	0	697658	1	1
ABHD12B	411016	431	41	28457	7423	0	0	0	0	50	0	898300	1	1
ABHD13	71759	952	-32	30953	8749	0	0	0	0	50	0	663208	1	1
ABHD14A	1045639	224	36	24115	8333	0	0	0	0	50	1	650039	1	1
ABHD14B	1045639	224	36	18915	6240	0	0	0	0	50	1	650039	1	1
ABHD15	802576	353	23	40950	14157	0	0	0	0	50	1	773578	1	1
ABHD2	639252	388	22	40417	10829	0	0	0	0	50	1	977717	1	1
ABHD3	269726	244	57	38558	10660	0	0	0	0	50	1	741039	1	1
ABHD4	975314	380	49	31993	9152	0	0	0	0	50	2	879671	1	1
ABHD5	103561	437	33	32825	9061	0	0	0	0	50	0	899535	1	1
ABHD6	611196	221	43	32110	8684	0	0	1	0	26	2	383071	1	1
ABHD8	842088	211	43	39312	12792	0	0	0	0	50	0	790218	1	1
ABI1	342602	447	30	49023	14391	0	0	0	0	50	1	851942	1	1
ABI2	415048	298	23	44434	12662	0	0	0	0	50	0	739310	1	1
ABI3	816202	346	24	33137	10894	0	0	0	0	50	1	890227	1	1
ABI3BP	459170	548	-1	103311	27963	0	0	1	0	50	1	913783	1	1
ABL1	505506	211	29	107055	32292	0	0	0	0	50	0	749450	1	1
ABL2	328468	301	6	112814	33514	0	0	0	0	50	0	892879	1	1
ABLIM1	267957	257	13	79573	20930	0	0	0	0	50	0	730158	1	1
ABLIM2	172573	230	36	64233	16497	0	0	0	0	50	1	670228	1	1
ABLIM3	339889	423	17	66690	16926	0	0	0	0	50	0	792831	1	1
ABO	1865433	416	45	32773	9737	0	0	0	0	50	0	656084	1	1
ABP1	763140	604	19	68094	20592	0	0	0	0	50	1	863824	1	1
ABR	1346718	270	22	86164	23309	0	0	0	0	50	0	734422	1	1
ABRA	113560	708	18	35204	9724	0	0	0	0	50	0	702221	1	1
ABT1	411992	498	24	24726	7605	0	0	0	0	50	0	985452	1	1
ABTB1	679358	336	45	44837	13000	0	0	0	0	50	0	768729	1	1
ABTB2	769733	368	32	78312	22464	0	0	0	0	50	0	758108	1	1
ACAA2	290591	530	35	37271	10699	0	0	0	0	50	0	707109	1	1
ACACB	528828	519	29	230568	65169	0	0	0	0	50	1	879281	1	1
ACAD10	599161	203	33	101465	29458	0	0	0	0	50	0	722683	1	1
ACAD11	210777	598	19	74594	19747	0	0	0	0	6	0	113581	1	1
ACAD8	270350	623	21	39338	10972	0	0	0	0	50	0	653588	1	1
ACAD9	1117839	382	54	58760	16666	0	0	0	0	50	1	746044	1	1
ACADL	190249	696	2	40950	11037	0	0	0	0	50	0	737685	1	1
ACADM	152734	578	-13	40872	10686	0	0	0	0	50	0	871169	1	1
ACADS	1741363	349	42	38350	11375	0	0	0	0	50	1	687570	1	1
ACADSB	256010	673	17	41197	11024	0	0	0	0	50	1	683579	1	1
ACADVL	1782958	316	21	61659	18135	0	0	0	0	50	0	606931	1	1
ACAN	561599	560	-1	224029	74750	0	0	0	0	50	1	944645	1	1
ACAP1	1911735	206	36	69407	20644	0	0	0	0	50	0	806000	1	1
ACAP2	431673	561	43	76102	18473	0	0	0	0	50	1	749528	1	1
ACAP3	1744013	273	28	78923	22438	0	0	0	0	50	1	832520	1	1
ACAT1	417904	695	19	40404	11466	0	0	0	0	50	0	1082497	1	1
ACAT2	648197	420	22	36985	10829	0	0	0	0	50	0	910780	1	1
ACBD3	756400	214	24	49569	13494	0	0	0	0	50	0	921440	1	1
ACBD4	806811	207	32	36868	5720	0	0	0	0	50	0	812448	1	1
ACBD5	383472	555	36	50999	12415	0	0	0	0	50	0	693160	1	1
ACBD6	543108	445	12	26988	7215	0	0	0	0	50	1	748514	1	1
ACBD7	254900	620	21	8866	2093	0	0	0	0	50	0	616902	1	1
ACCN1	34504	1007	-15	68835	20280	0	0	0	0	50	0	890851	1	1
ACCN2	1003045	211	56	54314	14677	0	0	0	0	50	1	725049	1	1
ACCN3	622098	373	41	53651	14716	0	0	0	0	50	0	918060	1	1
ACCN4	554323	403	33	60385	19058	0	0	0	0	50	0	712439	1	1
ACCN5	43787	643	-2	48542	12142	0	0	0	0	50	1	764855	1	1
ACCS	345807	680	3	47684	13156	0	0	0	0	50	0	785798	1	1
ACCSL	389604	680	1	54197	14560	0	0	0	0	50	0	711516	1	1
ACD	1065785	147	41	49634	16510	0	0	0	0	50	0	1028716	1	1
ACE	874574	267	-20	129090	35607	0	0	0	0	50	0	749931	1	1
ACE2	179295	NaN	32	77857	19136	0	0	0	0	50	0	857545	1	1
ACER1	943949	407	31	25246	6617	0	0	0	0	50	0	660361	1	1
ACER2	496889	421	24	26013	7059	0	0	0	0	50	0	849173	1	1
ACER3	279729	351	36	26377	6539	0	0	0	0	50	2	672568	1	1
ACHE	1339207	433	48	58149	19617	0	0	0	0	50	1	874692	1	1
ACIN1	1261207	185	41	127972	37661	0	0	0	0	50	0	787774	1	1
ACLY	1857838	191	33	104195	29107	0	0	0	0	50	0	826696	1	1
ACMSD	275440	496	15	32682	8229	0	0	0	0	50	0	668408	1	1
ACN9	146007	987	-9	11752	3146	0	0	0	0	50	1	746343	1	1
ACO1	290567	424	-18	84097	23153	0	0	0	0	50	0	682188	1	1
ACO2	1474160	162	69	73021	21086	0	0	0	0	50	0	692627	1	1
ACOT1	NaN	NaN	NaN	37349	12337	0	0	0	0	50	2	1460069	1	1
ACOT11	688014	415	18	62543	17485	0	0	0	0	50	0	820144	1	1
ACOT12	114956	831	16	53092	14222	0	0	0	0	50	0	650117	1	1
ACOT13	421216	362	24	13416	3939	0	0	0	0	50	0	726869	1	1
ACOT2	606300	169	39	42822	14118	0	0	0	0	50	0	752570	1	1
ACOT4	606300	169	39	37726	11960	0	0	0	0	50	0	752570	1	1
ACOT6	606300	169	39	19331	5239	0	0	0	0	50	0	752570	1	1
ACOT7	643590	176	26	43212	12597	0	0	0	0	50	2	682240	1	1
ACOT8	742720	180	48	30277	8528	0	0	0	0	50	0	562523	1	1
ACOT9	473183	NaN	48	44174	10699	0	0	0	0	50	0	727025	1	1
ACOX1	1667990	194	22	67743	18213	0	0	0	0	50	1	993759	1	1
ACOX2	551037	265	33	63973	18083	0	0	0	0	50	0	772980	1	1
ACOX3	138504	332	47	65871	18798	0	0	0	0	50	0	715676	1	1
ACOXL	NaN	NaN	NaN	55367	15262	0	0	0	0	50	2	1462994	1	1
ACP1	304765	624	-18	21112	4394	0	0	0	0	50	2	647842	1	1
ACP2	1274054	198	38	40495	11882	0	0	0	0	50	0	672022	1	1
ACP5	1152381	272	31	29497	9191	0	0	0	0	50	0	715507	1	1
ACP6	NaN	NaN	NaN	40612	11063	0	0	0	0	50	2	1458795	1	1
ACPL2	333903	352	22	44759	12298	0	0	0	0	50	0	858481	1	1
ACPP	210154	765	13	40820	10660	0	0	0	0	50	0	803218	1	1
ACPT	652250	593	27	38272	13325	0	0	0	0	50	2	820430	1	1
ACR	669934	295	41	38142	12012	0	0	0	0	50	0	747695	1	1
ACRBP	2816983	210	61	51064	14066	0	0	0	0	50	1	933335	1	1
ACRC	848605	NaN	39	66859	15977	0	0	0	0	50	0	563706	1	1
ACRV1	564542	595	13	25311	6279	0	0	0	0	50	1	828880	1	1
ACSBG1	421357	314	52	67964	18967	0	0	0	0	50	0	735839	1	1
ACSBG2	1332100	417	40	63752	16471	0	0	0	0	50	0	861302	1	1
ACSF2	1332860	200	23	58084	16328	0	0	0	0	50	1	882921	1	1
ACSF3	1277584	239	40	52585	16328	0	0	0	0	50	0	823901	1	1
ACSL1	311713	515	30	66794	18109	0	0	0	0	50	0	863889	1	1
ACSL3	261505	361	14	68380	18161	0	0	0	0	50	2	816686	1	1
ACSL4	209488	NaN	44	67626	17706	0	0	0	0	50	1	914420	1	1
ACSL5	184750	409	-4	70772	18928	0	0	0	0	50	1	724464	1	1
ACSL6	331471	484	25	71383	19565	0	0	0	0	50	0	872651	1	1
ACSM1	175989	641	11	54483	15093	0	0	0	0	50	1	906412	1	1
ACSM2A	181483	823	6	54470	15184	0	0	0	0	50	1	670423	1	1
ACSM2B	166410	726	-6	54496	15158	0	0	0	0	50	0	749892	1	1
ACSM3	211686	580	23	60827	16315	0	0	0	0	50	0	740753	1	1
ACSM4	1157790	439	27	54938	14911	0	0	0	0	50	1	753792	1	1
ACSM5	181483	823	6	54184	15704	0	0	0	0	50	1	670423	1	1
ACSS1	572146	563	-18	63882	18876	0	0	0	0	50	0	749073	1	1
ACSS2	1004645	205	44	67990	18473	0	0	0	0	50	0	954070	1	1
ACTA1	243405	361	29	35321	9841	0	0	0	0	50	0	736671	1	1
ACTA2	181406	267	30	35737	9737	0	0	0	0	50	0	635206	1	1
ACTB	1906749	195	34	34736	10036	0	0	0	0	50	0	830882	1	1
ACTBL2	160055	456	3	34086	10101	0	0	0	0	50	1	667433	1	1
ACTC1	521214	306	-1	35243	9919	0	0	0	0	50	0	853021	1	1
ACTG1	3582152	268	26	34658	10114	0	0	0	0	50	0	656110	1	1
ACTG2	1036341	284	45	35659	9776	0	0	0	0	50	1	902512	1	1
ACTL6A	399933	477	11	41899	10595	0	0	0	0	50	0	779948	1	1
ACTL6B	1884430	247	60	40807	11180	0	0	0	0	50	1	839085	1	1
ACTL7A	336944	471	9	39299	11713	0	0	0	0	50	0	728221	1	1
ACTL7B	336944	471	9	37245	11583	0	0	0	0	50	0	728221	1	1
ACTL8	249962	416	27	33215	10036	0	0	0	0	50	0	750295	1	1
ACTL9	536422	487	-47	36309	12558	0	0	0	0	50	1	1129726	1	1
ACTN1	609757	344	44	87490	22841	0	0	0	0	50	0	867035	1	1
ACTN2	427180	682	-10	85995	21840	0	0	1	0	50	1	543868	1	1
ACTN3	1343990	194	62	85254	23478	0	0	0	0	50	0	730418	1	1
ACTN4	1596646	322	36	87399	22503	0	0	0	0	50	1	766961	1	1
ACTR10	291132	545	21	39806	11011	0	0	0	0	50	0	800800	1	1
ACTR1A	871726	178	41	35620	10049	0	0	0	0	50	1	788268	1	1
ACTR1B	362146	520	25	35399	10270	0	0	0	0	50	0	936026	1	1
ACTR2	606183	343	31	37960	10244	0	0	0	0	50	0	989235	1	1
ACTR3	402980	629	15	40209	10530	0	0	0	0	50	0	775840	1	1
ACTR3B	190917	535	5	40105	10634	0	0	0	0	50	1	749255	1	1
ACTR3C	NaN	NaN	NaN	20371	5408	0	0	0	0	50	2	1453140	1	1
ACTR5	358558	551	35	56199	16263	0	0	0	0	50	0	765557	1	1
ACTR6	184664	650	9	38857	9230	0	0	0	0	50	1	872729	1	1
ACTR8	128709	552	39	59176	15899	0	0	0	0	50	0	623051	1	1
ACTRT1	938	NaN	-35	34060	10049	0	0	0	0	50	1	880490	1	1
ACVR1	81110	935	2	48334	12740	0	0	0	0	50	1	840554	1	1
ACVR1B	493265	371	27	51077	14404	0	0	0	0	50	0	605059	1	1
ACVR1C	79510	911	7	46202	12844	0	0	0	0	50	2	711867	1	1
ACVR2A	90992	951	-2	49153	12545	0	0	0	0	50	0	748280	1	1
ACVR2B	337567	514	28	48009	13650	0	0	0	0	50	0	878306	1	1
ACVRL1	493265	371	27	46605	13767	0	0	0	0	50	0	605059	1	1
ACY1	1045639	224	36	39130	10907	0	0	0	0	50	1	650039	1	1
ACY3	1408104	424	60	29211	9165	0	0	0	0	50	1	667160	1	1
ACYP1	919043	222	47	12272	2977	0	0	0	0	3	0	56043	1	1
ACYP2	619188	448	11	9711	2457	0	0	0	0	50	0	705094	1	1
ADA	801801	171	42	34931	9373	0	0	0	0	50	1	738712	1	1
ADAD1	227942	612	-14	54990	14313	0	0	0	0	50	2	664872	1	1
ADAD2	582429	364	12	59748	19734	0	0	0	0	50	1	865215	1	1
ADAL	823006	415	50	35269	8957	0	0	0	0	50	2	897910	1	1
ADAM10	506165	386	31	72150	17823	0	0	0	0	50	0	765011	1	1
ADAM11	1224408	175	31	73346	20800	0	0	0	0	50	0	761150	1	1
ADAM12	214443	485	-29	88998	25038	0	0	0	0	50	0	827788	1	1
ADAM15	1696720	214	44	80951	23647	0	0	0	0	50	2	875979	1	1
ADAM17	691902	278	38	79833	19500	0	0	0	0	50	0	826514	1	1
ADAM18	175645	764	4	72267	17355	0	0	0	0	50	1	760981	1	1
ADAM19	261911	1079	45	86840	24193	0	0	0	0	50	1	613431	1	1
ADAM2	12694	576	-2	72215	17095	0	0	0	0	50	0	1032096	1	1
ADAM20	333836	706	26	71890	19175	0	0	0	0	50	1	901316	1	1
ADAM21	423685	706	22	66586	18005	0	0	0	0	50	2	942448	1	1
ADAM22	178742	722	17	91715	22867	0	0	0	0	20	0	248833	1	1
ADAM23	290387	726	16	80834	20527	0	0	0	0	44	0	709592	1	1
ADAM28	55817	565	5	77922	18486	0	0	0	0	50	1	945256	1	1
ADAM29	49942	889	-36	76154	19903	0	0	0	0	50	0	677105	1	1
ADAM30	390094	560	9	72826	19721	0	0	0	0	50	0	743938	1	1
ADAM32	347510	612	-5	77116	18824	0	0	0	0	50	0	613223	1	1
ADAM33	942842	353	32	76011	22581	0	0	0	0	50	0	777998	1	1
ADAM7	56052	741	6	73918	17732	0	0	0	0	50	1	846222	1	1
ADAM8	339279	452	-12	79820	17095	0	0	0	0	50	0	783328	1	1
ADAM9	389317	428	22	78923	20371	0	0	0	0	50	1	977964	1	1
ADAMDEC1	57540	741	5	45422	11713	0	0	0	0	50	1	885924	1	1
ADAMTS10	622624	214	-14	102648	30264	0	0	0	0	50	0	798902	1	1
ADAMTS12	373086	875	7	150020	40261	0	0	0	0	50	0	797875	1	1
ADAMTS13	1843278	263	33	131300	40144	0	0	0	0	50	0	781482	1	1
ADAMTS14	546305	566	37	113750	33085	0	0	0	0	50	1	883480	1	1
ADAMTS15	686411	396	0	85306	27053	0	0	0	0	50	1	672230	1	1
ADAMTS16	89385	683	-23	114959	31798	0	0	0	0	50	0	837161	1	1
ADAMTS17	143599	755	-36	102102	29484	0	0	0	0	50	0	870987	1	1
ADAMTS18	61971	1102	-26	115245	31161	0	0	0	0	50	0	1009190	1	1
ADAMTS19	38096	1075	-16	114101	30667	0	0	0	0	50	1	711399	1	1
ADAMTS2	1496298	677	-4	114972	33033	0	0	0	0	50	0	948480	1	1
ADAMTS20	126632	906	-21	183768	45708	0	0	0	0	50	0	777738	1	1
ADAMTS3	70065	633	-15	114894	29562	0	0	0	0	50	0	889148	1	1
ADAMTS4	728669	234	37	74932	24362	0	0	0	0	50	1	822666	1	1
ADAMTS5	33106	441	-79	84279	25740	0	0	0	0	50	0	549484	1	1
ADAMTS6	275284	480	5	107419	26975	0	0	0	0	50	0	810355	1	1
ADAMTS7	507164	413	46	153153	47814	0	0	0	0	50	0	798200	1	1
ADAMTS8	693280	382	-6	80314	25064	0	0	0	0	50	0	713856	1	1
ADAMTS9	90552	783	-10	184730	47944	0	0	0	0	50	1	1030354	1	1
ADAMTSL1	313133	527	-18	163072	47645	0	0	0	0	50	1	935246	1	1
ADAMTSL3	112410	888	-7	159562	42926	0	0	0	0	50	0	1045460	1	1
ADAMTSL4	1475649	152	31	99424	31928	0	0	0	0	50	0	745485	1	1
ADAMTSL5	2122824	221	35	43420	13364	0	0	0	0	50	0	665392	1	1
ADAP1	737267	310	41	35958	9477	0	0	0	0	50	0	786903	1	1
ADAP2	594135	209	20	36699	9555	0	0	0	0	50	0	700648	1	1
ADAR	1927515	403	36	113828	31915	0	0	0	0	50	0	629226	1	1
ADARB1	596496	250	42	68458	20345	0	0	0	0	50	1	750945	1	1
ADARB2	284080	633	8	66105	21879	0	0	0	0	50	0	749814	1	1
ADAT1	449343	354	18	47424	12831	0	0	0	0	50	0	778921	1	1
ADAT2	299410	495	7	18499	4823	0	0	0	0	50	0	760877	1	1
ADAT3	NaN	NaN	NaN	30238	10946	0	0	0	0	50	2	1458678	1	1
ADC	756118	264	21	42874	12467	0	0	0	0	50	1	724438	1	1
ADCK1	427928	517	24	49088	13780	0	0	0	0	50	0	926497	1	1
ADCK2	354697	567	38	55900	18551	0	0	0	0	50	1	732498	1	1
ADCK4	1022809	201	31	50713	15236	0	0	0	0	50	0	631735	1	1
ADCK5	2284602	200	32	53768	16471	0	0	0	0	50	0	783328	1	1
ADCY1	287931	686	11	102024	32058	0	0	0	0	50	1	757653	1	1
ADCY10	534611	238	13	155571	37908	0	0	0	0	50	4	931047	1	1
ADCY2	60911	1014	-22	103220	28366	0	0	0	0	50	0	843284	1	1
ADCY3	284877	296	37	106626	30537	0	0	0	0	50	2	674544	1	1
ADCY4	906124	173	39	99229	30797	0	0	0	0	15	1	323765	1	1
ADCY5	372027	458	42	116090	34762	0	0	0	0	50	0	806338	1	1
ADCY6	1715886	328	38	107471	32578	0	0	0	0	50	1	745030	1	1
ADCY7	304156	520	21	100295	29926	0	0	0	0	50	0	831493	1	1
ADCY8	45406	771	-7	115115	34099	0	0	0	0	50	0	835757	1	1
ADCY9	740126	140	19	123825	36153	0	0	0	0	50	0	695864	1	1
ADCYAP1	272034	531	-13	16341	5031	0	0	0	0	50	0	802425	1	1
ADCYAP1R1	364216	631	7	45474	11817	0	0	0	0	50	0	720798	1	1
ADD1	669373	264	45	73099	20540	0	0	0	0	50	0	765661	1	1
ADD2	659649	592	24	76245	19851	0	0	0	0	50	0	930865	1	1
ADD3	349258	424	3	66937	17966	0	0	0	0	50	0	773565	1	1
ADH1A	250334	786	3	35386	9932	0	0	0	0	50	0	747084	1	1
ADH1B	332785	854	8	35126	10192	0	0	0	0	50	0	732927	1	1
ADH1C	332785	854	8	35178	10140	0	0	0	0	50	0	732927	1	1
ADH4	166160	760	1	35750	10153	0	0	0	0	50	1	811824	1	1
ADH5	192327	549	11	35308	9893	0	0	0	0	50	0	832754	1	1
ADH6	167884	786	-3	35490	9906	0	0	0	0	50	0	785915	1	1
ADH7	332944	854	12	38909	10816	0	0	0	0	50	0	626691	1	1
ADHFE1	259302	268	12	43836	13026	0	0	0	0	50	0	746499	1	1
ADI1	254699	390	16	17290	4316	0	0	0	0	50	2	785798	1	1
ADIG	525955	539	39	7852	1859	0	0	0	0	48	1	809549	1	1
ADIPOQ	449980	384	25	22321	6656	0	0	0	0	50	0	730444	1	1
ADIPOR1	421206	389	30	35087	9997	0	0	0	0	50	0	752778	1	1
ADIPOR2	259057	403	29	36556	9815	0	0	0	0	50	0	979589	1	1
ADK	622159	598	40	35854	8879	0	0	0	0	50	1	937755	1	1
ADM	860704	273	12	16913	5317	0	0	0	0	50	0	882739	1	1
ADM2	1075525	207	42	12922	4667	0	0	0	0	50	0	782119	1	1
ADNP	386595	367	36	102492	27027	0	0	0	0	50	1	781742	1	1
ADNP2	477656	572	4	101634	31278	0	0	0	0	50	1	851929	1	1
ADO	176901	852	32	23764	7943	0	0	0	0	50	0	851890	1	1
ADORA1	469029	453	37	29445	9126	0	0	0	0	50	0	720473	1	1
ADORA2A	611616	186	54	36608	11869	0	0	0	0	50	1	737945	1	1
ADORA2B	931951	350	-33	29614	9503	0	0	0	0	50	0	838435	1	1
ADORA3	374092	330	27	54275	15301	0	0	0	0	50	0	799396	1	1
ADPGK	1106545	526	43	45292	13871	0	0	0	0	21	0	549263	1	1
ADPRH	289679	595	40	33072	9282	0	0	0	0	50	1	588289	1	1
ADPRHL1	808201	223	49	33501	9048	0	0	0	0	50	0	726037	1	1
ADPRHL2	853740	282	27	33319	10127	0	0	0	0	50	1	862823	1	1
ADRA1A	259233	692	3	50570	15340	0	0	0	0	50	0	743119	1	1
ADRA1B	206270	458	31	45864	15249	0	0	0	0	50	0	958204	1	1
ADRA1D	805921	428	14	49725	17550	0	0	0	0	50	0	665847	1	1
ADRA2A	285613	547	-1	40560	13962	0	0	0	0	50	1	651950	1	1
ADRA2B	792336	366	41	39338	13078	0	0	0	0	50	0	947089	1	1
ADRA2C	326572	592	36	39793	14456	0	0	0	0	50	0	779402	1	1
ADRB1	272214	502	25	40976	15028	0	0	0	0	50	0	743730	1	1
ADRB2	298390	408	22	37531	10907	0	0	0	0	50	1	771498	1	1
ADRB3	672861	356	25	34710	13299	0	0	0	0	50	1	785577	1	1
ADRBK1	1369264	177	44	66560	17290	0	0	0	0	50	1	871624	1	1
ADRBK2	149272	580	-13	67717	16016	0	0	0	0	50	0	825617	1	1
ADRM1	990360	252	9	37791	11388	0	0	0	0	50	1	652743	1	1
ADSL	445026	427	47	46267	12506	0	0	0	0	50	0	816712	1	1
ADSS	710088	534	2	43732	11609	0	0	0	0	50	0	906347	1	1
ADSSL1	681504	208	29	52572	15639	0	0	0	0	50	3	529425	1	1
AEBP1	1151124	282	56	108030	30693	0	0	0	0	50	0	848887	1	1
AEBP2	152349	339	-21	48828	13182	0	0	0	0	50	0	758745	1	1
AEN	393645	605	14	29666	8944	0	0	0	0	50	0	801606	1	1
AES	1092464	195	30	25805	7345	0	0	0	0	50	0	690651	1	1
AFAP1	166375	260	38	76258	21749	0	0	0	0	50	0	746798	1	1
AFAP1L1	386336	380	25	72722	20059	0	0	0	0	50	0	708448	1	1
AFAP1L2	303560	299	6	77376	21255	0	0	0	0	50	0	846885	1	1
AFF1	270752	518	48	114309	32175	0	0	0	0	50	1	711646	1	1
AFF2	97330	NaN	-13	124384	34385	0	0	0	0	50	0	781079	1	1
AFF3	353071	868	12	117507	32565	0	0	0	0	50	0	661687	1	1
AFF4	686574	200	66	109941	29367	0	0	0	0	50	1	585689	1	1
AFG3L2	492344	214	26	74919	20943	0	0	0	0	50	0	926250	1	1
AFM	331900	594	3	58617	13845	0	0	0	0	50	1	783783	1	1
AFMID	605209	191	26	29913	7956	0	0	0	0	50	1	811460	1	1
AFP	331900	594	3	58916	14716	0	0	0	0	50	1	783783	1	1
AFTPH	532219	332	21	87711	23439	0	0	0	0	50	0	825097	1	1
AG2	NaN	NaN	NaN	10972	3419	0	0	0	0	50	2	1451151	1	1
AGA	44980	837	-8	32929	8918	0	0	0	0	50	0	878618	1	1
AGAP1	134111	614	3	79963	23075	0	0	0	0	3	0	51584	1	1
AGAP11	401785	164	45	50570	14521	0	0	0	0	50	0	623883	1	1
AGAP2	1160849	344	39	111540	37245	0	0	0	0	50	2	736749	1	1
AGAP3	616572	337	39	85449	26520	0	0	0	0	50	0	715949	1	1
AGAP4	136259	NaN	34	61373	17251	0	0	0	0	50	0	792727	1	1
AGAP5	NaN	NaN	NaN	63804	17745	0	0	0	0	50	2	1465477	1	1
AGAP6	NaN	NaN	NaN	63817	17654	0	0	0	0	50	2	1465386	1	1
AGAP7	NaN	NaN	NaN	61373	17251	0	0	0	0	50	2	1464983	1	1
AGAP8	NaN	NaN	NaN	61477	17147	0	0	0	0	50	2	1464879	1	1
AGBL1	5624	980	-56	101140	27287	0	0	0	0	50	1	616824	1	1
AGBL2	984490	155	23	86619	21762	0	0	0	0	50	0	727805	1	1
AGBL3	NaN	NaN	NaN	88374	21879	0	0	0	0	50	2	1469611	1	1
AGBL4	16483	1041	-18	48711	12285	0	0	0	0	50	1	790114	1	1
AGBL5	1257014	290	34	83252	25246	0	0	0	0	50	1	714194	1	1
AGER	2119974	392	28	40157	9997	0	0	0	0	50	1	868153	1	1
AGFG1	194117	353	23	55146	15561	0	0	0	0	50	2	775385	1	1
AGFG2	1651125	242	60	44174	13936	0	0	0	0	50	2	775944	1	1
AGGF1	261159	333	30	68471	17212	0	0	0	0	50	0	625989	1	1
AGK	227799	887	16	40872	10959	0	0	0	0	50	1	904059	1	1
AGL	289704	595	9	149201	37999	0	0	0	0	50	0	781170	1	1
AGMAT	656850	162	31	31798	10439	0	0	0	0	50	1	649428	1	1
AGPAT1	2119974	392	28	26026	8138	0	0	0	0	50	1	868153	1	1
AGPAT2	1918290	190	56	25506	7995	0	0	0	0	50	1	716807	1	1
AGPAT3	842264	294	67	35282	10075	0	0	0	0	50	1	791765	1	1
AGPAT4	74993	874	-5	35880	9711	0	0	0	0	50	0	818831	1	1
AGPAT5	130932	475	32	34684	9113	0	0	0	0	50	0	893152	1	1
AGPAT6	365713	496	30	43524	11661	0	0	0	0	50	0	764140	1	1
AGPAT9	186399	436	21	41262	11349	0	0	0	0	50	0	683514	1	1
AGPHD1	506023	375	39	35308	9269	0	0	0	0	50	0	703469	1	1
AGPS	378489	434	26	63401	16744	0	0	0	0	50	0	847938	1	1
AGR2	361606	385	-7	17316	4368	0	0	0	0	50	0	787137	1	1
AGR3	360434	376	-15	16718	3913	0	0	0	0	50	0	756587	1	1
AGRN	1971475	239	15	184938	59982	0	0	0	0	12	1	312962	1	1
AGRP	1082466	153	49	12246	3861	0	0	0	0	50	3	781456	1	1
AGT	422372	568	6	43589	13897	0	0	0	0	50	0	814450	1	1
AGTPBP1	227838	613	9	113594	29185	0	0	0	0	50	0	834613	1	1
AGTR1	271257	825	-24	32812	9464	0	0	0	0	50	1	679705	1	1
AGTR2	224760	NaN	7	33280	9464	0	0	0	0	50	0	832377	1	1
AGTRAP	606580	187	36	20683	2600	0	0	0	0	50	0	841126	1	1
AGXT	1187158	297	30	36387	11154	0	0	0	0	50	0	770510	1	1
AGXT2	243997	675	23	49010	13273	0	0	0	0	50	0	787839	1	1
AGXT2L1	104349	499	21	48321	12207	0	0	0	0	50	0	711750	1	1
AGXT2L2	672705	448	46	42679	11960	0	0	0	0	50	0	929162	1	1
AHCTF1	422581	405	4	213005	58825	0	0	0	0	50	0	691093	1	1
AHCY	962066	151	50	40781	11284	0	0	0	0	50	1	830336	1	1
AHCYL1	660515	373	29	51194	13429	0	0	0	0	50	0	753259	1	1
AHCYL2	776656	420	44	61958	16822	0	0	0	0	50	1	825305	1	1
AHI1	152087	422	29	117598	28652	0	0	0	0	50	0	830258	1	1
AHNAK	2746294	204	49	539747	154336	0	0	0	0	2	0	174473	1	1
AHNAK2	854493	205	30	518583	160485	0	0	0	0	7	0	262171	1	1
AHR	370010	410	2	80041	20852	0	0	0	0	50	0	764231	1	1
AHRR	808969	399	34	66833	20878	0	0	0	0	50	0	975455	1	1
AHSA1	504548	359	47	32487	8424	0	0	0	0	50	0	770328	1	1
AHSA2	704383	371	36	13377	3393	0	0	0	0	50	0	951431	1	1
AHSG	508316	436	45	33631	10439	0	0	0	0	50	0	1021605	1	1
AHSP	826452	688	-17	9737	2626	0	0	0	0	50	1	922064	1	1
AICDA	291883	422	15	18824	5161	0	0	0	0	50	0	759538	1	1
AIDA	222206	392	1	30069	7254	0	0	0	0	50	1	1006863	1	1
AIF1	2517285	220	35	20644	5408	0	0	0	0	50	0	796978	1	1
AIF1L	829407	293	36	17563	4082	0	0	0	0	50	1	976391	1	1
AIFM1	379257	NaN	58	62023	17810	0	0	0	0	50	0	648258	1	1
AIFM2	484729	425	25	34541	10465	0	0	0	0	50	0	798512	1	1
AIFM3	577297	192	58	58084	16484	0	0	0	0	50	0	767026	1	1
AIM1	220264	271	41	159926	44746	0	0	0	0	50	1	737451	1	1
AIM1L	1021101	217	22	58149	16536	0	0	0	0	50	0	677560	1	1
AIM2	97976	866	8	32461	8567	0	0	0	0	50	0	818545	1	1
AIMP1	158895	711	5	32032	8489	0	0	0	0	50	1	859885	1	1
AIMP2	NaN	NaN	NaN	29484	8541	0	0	0	0	50	2	1456273	1	1
AIP	1392213	215	53	30914	8593	0	0	0	0	50	1	564382	1	1
AIPL1	249769	359	6	35646	10257	0	0	0	0	50	0	703872	1	1
AIRE	1153513	308	65	58409	18655	0	0	0	0	50	0	694798	1	1
AJAP1	5695	921	4	36803	12181	0	0	0	0	50	0	859885	1	1
AK1	1278941	201	51	18473	5278	0	0	0	0	50	0	814684	1	1
AK2	807536	233	27	22906	6383	0	0	0	0	50	1	865644	1	1
AK3	231882	608	30	21008	6292	0	0	0	0	50	1	708981	1	1
AK3L1	280010	351	-9	21112	5720	0	0	0	0	50	1	771693	1	1
AK5	484699	536	-8	54015	13884	0	0	0	0	50	0	571168	1	1
AK7	328475	560	14	69901	17537	0	0	0	0	50	0	841386	1	1
AKAP1	413131	258	-6	82511	24817	0	0	0	0	50	0	887614	1	1
AKAP10	545359	348	-11	63297	16458	0	0	0	0	50	1	778349	1	1
AKAP11	183147	411	51	177099	47151	0	0	0	0	50	0	823901	1	1
AKAP12	340429	383	11	163176	46956	0	0	0	0	50	0	763308	1	1
AKAP14	772178	NaN	38	19669	4628	0	0	0	0	50	0	825006	1	1
AKAP2	NaN	NaN	NaN	85982	25597	0	0	0	0	50	2	1473329	1	1
AKAP3	277828	874	18	78195	22113	0	0	0	0	19	0	305331	1	1
AKAP4	56301	NaN	5	79924	20891	0	0	0	0	50	0	987727	1	1
AKAP5	670466	221	54	39390	10686	0	0	0	0	50	1	848367	1	1
AKAP6	127586	715	-10	215319	58149	0	0	0	0	50	0	1068769	1	1
AKAP7	165730	682	15	35750	8359	0	0	0	0	50	0	609778	1	1
AKAP8	494792	481	28	65624	17563	0	0	0	0	50	0	875511	1	1
AKAP9	674222	611	16	374595	90285	0	0	0	0	40	0	541762	1	1
AKD1	345757	686	21	185796	44538	0	0	0	0	50	0	1000636	1	1
AKIRIN1	681587	318	30	18135	5070	0	0	0	0	50	1	825110	1	1
AKIRIN2	235638	346	33	18993	5499	0	0	0	0	50	0	707278	1	1
AKNAD1	801073	236	8	79820	20332	0	0	0	0	50	2	758810	1	1
AKR1A1	873800	161	27	30615	8853	0	0	0	0	50	0	778544	1	1
AKR1B10	403585	319	21	30628	7865	0	0	0	0	50	1	842972	1	1
AKR1B15	403585	319	21	33475	8450	0	0	0	0	50	1	842972	1	1
AKR1C1	343868	608	-13	30797	8359	0	0	0	0	50	1	583310	1	1
AKR1C2	343868	608	-13	32591	8710	0	0	0	0	50	1	583310	1	1
AKR1C3	438967	678	-14	31044	8190	0	0	0	0	50	1	586612	1	1
AKR1C4	630098	678	-21	31070	8164	0	0	0	0	50	1	651495	1	1
AKR1D1	220333	478	16	31486	8099	0	0	0	0	50	2	663455	1	1
AKR1E2	287187	559	-13	31083	7878	0	0	0	0	50	1	631033	1	1
AKR7A2	810462	448	40	33215	9919	0	0	0	0	50	0	619138	1	1
AKR7A3	810462	448	40	30901	8957	0	0	0	0	50	0	619138	1	1
AKR7L	799326	448	35	33020	6760	0	0	0	0	50	0	896389	1	1
AKT1	711772	247	36	46345	11960	0	0	0	0	50	0	687635	1	1
AKT1S1	1673246	205	37	22932	7761	0	0	0	0	50	0	769210	1	1
AKT2	1005838	400	30	46228	12194	0	0	0	0	50	0	657995	1	1
AKTIP	247554	403	8	28158	7527	0	0	0	0	50	0	752765	1	1
ALAD	390186	297	36	31369	9074	0	0	0	0	50	1	708123	1	1
ALAS1	1114737	181	52	59683	16874	0	0	1	0	50	2	827788	1	1
ALAS2	245504	NaN	8	57226	16094	0	0	0	0	50	0	847028	1	1
ALB	315782	613	8	58929	14703	0	0	0	0	50	0	827125	1	1
ALCAM	165047	784	-3	56147	14521	0	0	0	0	50	0	787358	1	1
ALDH16A1	2173457	290	44	71773	24674	0	0	0	0	50	1	724880	1	1
ALDH18A1	369001	454	26	74373	21411	0	0	0	0	50	0	960856	1	1
ALDH1A1	344512	542	1	47723	12961	0	0	0	0	50	0	901875	1	1
ALDH1A2	187239	674	-1	49231	13520	0	0	0	0	50	0	775463	1	1
ALDH1A3	378556	374	0	48165	13728	0	0	0	0	50	0	677352	1	1
ALDH1B1	272380	622	3	46423	14339	0	0	0	0	50	1	698932	1	1
ALDH1L1	203027	610	30	84877	24206	0	0	0	0	50	1	700141	1	1
ALDH1L2	244603	334	33	87724	23816	0	0	0	0	50	0	682708	1	1
ALDH2	691258	242	44	48399	14079	0	0	0	0	50	1	775372	1	1
ALDH3A1	550749	220	-13	42809	11869	0	0	0	0	50	0	773305	1	1
ALDH3A2	544087	332	-2	48412	13364	0	0	0	0	50	1	852605	1	1
ALDH3B1	1357582	356	31	42874	13169	0	0	0	0	50	0	754728	1	1
ALDH3B2	1408104	424	60	36127	10283	0	0	0	0	50	1	667160	1	1
ALDH4A1	642600	453	27	52858	15470	0	0	0	0	50	1	800722	1	1
ALDH5A1	407627	461	18	50271	15600	0	0	0	0	50	0	812461	1	1
ALDH7A1	235232	191	19	51610	14222	0	0	0	0	50	1	700492	1	1
ALDH9A1	321831	408	0	48516	13767	0	0	0	0	50	0	799370	1	1
ALDOA	NaN	NaN	NaN	33865	10088	0	0	0	0	50	2	1457820	1	1
ALDOB	112947	898	-22	34255	9698	0	0	0	0	50	0	787956	1	1
ALDOC	1651143	225	31	33826	10127	0	0	0	0	50	1	789113	1	1
ALG1	552298	419	3	43758	12597	0	0	0	0	50	1	724386	1	1
ALG10	23464	1025	-29	43797	11973	0	0	0	0	50	0	854828	1	1
ALG10B	42332	589	-38	43797	11973	0	0	0	0	50	0	864786	1	1
ALG11	385945	461	41	45578	12649	0	0	0	0	50	0	821223	1	1
ALG12	771339	208	6	44148	14469	0	0	0	0	50	2	820495	1	1
ALG13	124127	NaN	20	114426	28392	0	0	0	0	50	1	767676	1	1
ALG14	275272	425	-9	19838	6097	0	0	0	0	50	0	770029	1	1
ALG1L	213057	583	19	18031	4823	0	0	0	0	50	1	582699	1	1
ALG1L2	NaN	NaN	NaN	20592	5772	0	0	0	0	50	2	1453504	1	1
ALG2	203560	410	37	37414	11609	0	0	0	0	50	0	758706	1	1
ALG3	1460188	257	49	41951	12844	0	0	0	0	50	0	756808	1	1
ALG5	176745	650	16	31083	8424	0	0	0	0	50	2	704561	1	1
ALG6	133567	477	2	48802	12662	0	0	0	0	50	1	661180	1	1
ALG8	551110	208	23	51662	14404	0	0	0	0	50	0	859508	1	1
ALG9	437477	182	28	58708	16094	0	0	0	0	50	1	805948	1	1
ALK	202198	882	19	149877	44148	0	0	0	0	6	0	101231	1	1
ALKBH1	455772	384	47	36426	10140	0	0	0	0	50	0	784082	1	1
ALKBH2	595266	487	20	24050	7111	0	0	0	0	50	1	719030	1	1
ALKBH3	437017	676	6	27794	7189	0	0	0	0	50	0	593944	1	1
ALKBH4	611052	174	63	27040	8801	0	0	0	0	50	0	620958	1	1
ALKBH5	918230	192	23	35750	10933	0	0	0	0	50	0	650546	1	1
ALKBH6	980636	320	19	24817	7436	0	0	0	0	50	0	677625	1	1
ALKBH7	943949	407	31	19695	6825	0	0	0	0	50	0	660361	1	1
ALKBH8	234842	643	-2	63323	16198	0	0	0	0	50	0	758810	1	1
ALLC	252769	496	5	37492	10088	0	0	0	0	50	0	901069	1	1
ALOX12	1645511	360	14	62101	17693	0	0	0	0	25	0	465192	1	1
ALOX12B	1528802	272	26	65520	18798	0	0	0	0	50	0	679900	1	1
ALOX15	1226703	318	25	61503	18174	0	0	0	0	50	0	749580	1	1
ALOX15B	1528802	272	26	62660	18577	0	0	0	0	50	0	679900	1	1
ALOX5	127792	737	36	64233	16848	0	0	0	0	50	0	781430	1	1
ALOX5AP	381672	451	76	15418	4238	0	0	0	0	50	1	673530	1	1
ALOXE3	1455014	202	31	78143	22945	0	0	0	0	50	0	827229	1	1
ALPI	271362	191	32	48724	14807	0	0	0	0	50	0	638378	1	1
ALPK2	204534	290	67	200174	55705	0	0	0	0	50	1	817427	1	1
ALPK3	351352	213	28	169962	55302	0	0	0	0	50	1	901069	1	1
ALPL	547986	297	42	49530	13455	0	0	0	0	50	1	635960	1	1
ALPP	307666	204	37	48971	15301	0	0	0	0	50	2	597155	1	1
ALPPL2	307666	204	37	48854	15145	0	0	0	0	50	2	597155	1	1
ALS2	438202	523	29	158119	43979	0	0	0	0	4	0	87932	1	1
ALS2CL	298503	495	41	89505	26013	0	0	0	0	50	1	692822	1	1
ALS2CR11	436378	491	24	177047	44083	0	0	0	0	50	0	965484	1	1
ALS2CR12	554245	411	31	44486	9880	0	0	0	0	50	1	754624	1	1
ALS2CR4	435399	534	25	39468	11037	0	0	0	0	50	0	718575	1	1
ALS2CR8	543912	392	33	68575	18551	0	0	0	0	50	0	765921	1	1
ALX1	35916	925	-34	30667	8138	0	0	0	0	50	0	729352	1	1
ALX3	571576	400	29	30719	10075	0	0	0	0	50	2	717418	1	1
ALX4	301098	575	9	37401	11271	0	0	0	0	50	0	759018	1	1
AMAC1	753178	505	16	28964	10777	0	0	0	0	50	0	590291	1	1
AMAC1L2	499514	671	36	28912	10829	0	0	0	0	50	0	727272	1	1
AMAC1L3	NaN	NaN	NaN	29185	10712	0	0	0	0	50	2	1458444	1	1
AMACR	270768	793	4	48503	9802	0	0	0	0	50	0	867594	1	1
AMBN	262055	689	14	42484	11882	0	0	0	0	50	0	710008	1	1
AMBP	244063	558	0	33722	8983	0	0	0	0	50	1	681005	1	1
AMBRA1	880494	212	45	110292	33813	0	0	0	0	50	0	901095	1	1
AMD1	321448	282	31	32526	7917	0	0	0	0	50	0	730522	1	1
AMDHD1	366272	436	8	39858	11349	0	0	0	0	50	1	720148	1	1
AMDHD2	2085452	321	49	59059	17576	0	0	0	0	50	1	768690	1	1
AMELX	NaN	NaN	NaN	19617	5421	0	0	0	0	50	2	1453153	1	1
AMELY	0	0	0	18174	5187	0	0	0	0	50	0	773188	1	1
AMFR	498079	442	-9	60125	17251	0	0	0	0	50	0	861536	1	1
AMH	1603571	240	27	47424	18837	0	0	0	0	50	0	800904	1	1
AMHR2	1712232	191	56	53768	15106	0	0	0	0	50	2	822874	1	1
AMICA1	707709	293	56	37895	10309	0	0	0	0	50	0	585936	1	1
AMIGO1	1056159	272	37	44291	13663	0	0	0	0	50	1	656461	1	1
AMIGO2	150007	380	-12	47203	14144	0	0	0	0	50	0	824941	1	1
AMIGO3	NaN	NaN	NaN	43862	15223	0	0	0	0	50	2	1462955	1	1
AMMECR1	157872	NaN	34	30433	9503	0	0	0	0	50	0	779883	1	1
AMMECR1L	588745	248	39	28912	8411	0	0	0	0	50	0	806104	1	1
AMN	758150	286	50	40898	14014	0	0	0	0	50	0	652496	1	1
AMN1	313930	228	11	24479	6760	0	0	0	0	50	0	745667	1	1
AMOT	25417	NaN	10	98462	30043	0	0	1	0	50	3	938262	1	1
AMOTL1	332670	472	-7	88686	25155	0	0	0	0	50	0	940290	1	1
AMOTL2	303429	189	21	70512	22269	0	0	0	0	50	0	897065	1	1
AMPD1	600650	472	11	74906	18967	0	0	0	0	50	1	767949	1	1
AMPD2	989433	201	29	83018	24037	0	0	0	0	50	0	859924	1	1
AMPD3	777397	378	27	74074	19877	0	0	0	0	50	0	956059	1	1
AMPH	167080	639	7	66157	18473	0	0	0	0	50	1	792545	1	1
AMT	1585328	201	32	37999	11609	0	0	0	0	50	0	693732	1	1
AMTN	264427	861	27	19656	6162	0	0	0	0	50	0	819910	1	1
AMY1A	NaN	NaN	NaN	147381	37284	0	0	0	0	50	2	1485016	1	1
AMY1B	NaN	NaN	NaN	147381	37284	0	0	0	0	50	2	1485016	1	1
AMY1C	24508	1029	-14	147381	37284	0	0	0	0	50	0	763620	1	1
AMY2A	27205	1015	-20	48958	12506	0	0	0	0	50	0	809250	1	1
AMY2B	31276	974	-19	49036	12506	0	0	0	0	50	0	888706	1	1
AMZ1	767440	392	30	44941	14222	0	0	0	0	50	0	770185	1	1
AMZ2	764688	237	11	34346	8749	0	0	0	0	50	1	793546	1	1
ANAPC10	182708	1139	20	17862	4524	0	0	0	0	50	1	785330	1	1
ANAPC11	3798594	211	19	19383	4134	0	0	0	0	50	0	674739	1	1
ANAPC13	254024	188	16	7358	1729	0	0	0	0	50	1	655603	1	1
ANAPC16	764632	140	40	10335	3120	0	0	0	0	50	0	769379	1	1
ANAPC2	1722012	202	36	75660	22659	0	0	0	0	50	0	828087	1	1
ANAPC4	233480	611	44	79521	19656	0	0	0	0	50	1	584285	1	1
ANAPC5	959300	258	39	71786	19162	0	0	0	0	50	1	930397	1	1
ANAPC7	964525	206	50	56667	15210	0	0	0	0	50	2	706290	1	1
ANG	NaN	NaN	NaN	13442	4030	0	0	0	0	50	2	1451762	1	1
ANGEL2	315884	412	12	51571	13442	0	0	0	0	50	1	913510	1	1
ANGPT1	50022	671	-19	48165	11466	0	0	0	0	50	0	867321	1	1
ANGPT2	NaN	NaN	NaN	48022	11375	0	0	0	0	50	2	1459107	1	1
ANGPT4	824412	579	36	47151	13104	0	0	0	0	50	0	713362	1	1
ANGPTL1	NaN	NaN	NaN	46449	11739	0	0	0	0	50	2	1459471	1	1
ANGPTL2	NaN	NaN	NaN	45591	12831	0	0	0	0	50	2	1460563	1	1
ANGPTL3	NaN	NaN	NaN	44278	10673	0	0	0	0	50	2	1458405	1	1
ANGPTL4	726988	204	0	37570	10985	0	0	0	0	50	1	747760	1	1
ANGPTL5	416999	514	-21	37726	9035	0	0	0	0	50	0	1008917	1	1
ANGPTL6	1675365	272	15	42185	13780	0	0	0	0	1	0	22061	1	1
ANGPTL7	NaN	NaN	NaN	32864	8359	0	0	0	0	50	2	1456091	1	1
ANK1	574508	533	36	189514	55952	0	0	0	0	50	1	877552	1	1
ANK2	237324	911	14	367640	105157	0	0	0	0	32	0	490789	1	1
ANK3	213806	634	-8	414245	117598	0	0	0	0	12	0	344409	1	1
ANKAR	408508	452	20	136019	35464	0	0	0	0	50	0	905450	1	1
ANKDD1A	705779	185	57	49244	14209	0	0	0	0	50	1	737425	1	1
ANKFN1	184382	511	-53	73060	18980	0	0	0	0	50	0	632424	1	1
ANKFY1	816229	357	26	112567	31772	0	0	0	0	50	0	757224	1	1
ANKH	503265	410	8	45981	13416	0	0	0	0	50	0	950352	1	1
ANKHD1	NaN	NaN	NaN	236210	70525	0	0	0	0	50	2	1518257	1	1
ANKHD1-EIF4EBP3	688522	296	30	242112	70629	0	0	1	0	50	1	782795	1	1
ANKIB1	708388	452	30	103545	26949	0	0	0	0	50	0	900796	1	1
ANKLE1	865138	212	38	54873	18447	0	0	0	0	50	1	688883	1	1
ANKLE2	779125	601	32	86567	25246	0	0	0	0	50	1	866606	1	1
ANKMY2	291955	612	-13	42549	10569	0	0	0	0	50	2	639782	1	1
ANKRA2	403014	289	42	29757	8073	0	0	0	0	50	0	793221	1	1
ANKRD1	103854	510	4	30641	8047	0	0	0	0	50	1	667368	1	1
ANKRD10	506421	402	22	38922	11115	0	0	0	0	50	0	855049	1	1
ANKRD11	1263742	322	40	244738	68666	0	0	0	0	49	1	919867	1	1
ANKRD12	434324	391	56	195299	47944	0	0	0	0	50	0	748800	1	1
ANKRD13A	950689	254	54	56797	14534	0	0	0	0	50	2	746005	1	1
ANKRD13B	719319	383	30	58227	17316	0	0	0	0	50	0	730821	1	1
ANKRD13C	295772	396	-1	51545	13741	0	0	0	0	50	1	865982	1	1
ANKRD13D	1369264	177	44	56446	16640	0	0	0	0	50	1	871624	1	1
ANKRD16	649866	305	28	33969	9555	0	0	0	0	50	2	873665	1	1
ANKRD17	265492	747	19	238043	71773	0	0	0	0	20	0	309387	1	1
ANKRD18A	NaN	NaN	NaN	95563	23036	0	0	0	0	50	2	1470768	1	1
ANKRD2	564805	169	40	33436	10049	0	0	0	0	50	0	738868	1	1
ANKRD20A1	NaN	NaN	NaN	79222	19370	0	0	0	0	50	2	1467102	1	1
ANKRD20A2	NaN	NaN	NaN	158496	38688	0	0	0	0	50	2	1486420	1	1
ANKRD20A3	NaN	NaN	NaN	237718	58058	0	0	0	0	50	2	1505790	1	1
ANKRD20A4	NaN	NaN	NaN	79365	19227	0	0	0	0	50	2	1466959	1	1
ANKRD22	175425	289	26	18369	4875	0	0	0	0	50	0	744965	1	1
ANKRD23	822597	392	46	28665	8463	0	0	0	0	50	1	1009931	1	1
ANKRD24	2194691	244	41	104299	33020	0	0	0	0	50	1	763750	1	1
ANKRD27	369667	455	-38	100126	27209	0	0	0	0	50	0	636506	1	1
ANKRD28	345831	435	29	100126	27404	0	0	0	0	50	1	963664	1	1
ANKRD29	331927	138	67	28145	8593	0	0	0	0	50	0	799487	1	1
ANKRD30A	53742	1067	-43	131820	30576	0	0	0	0	50	0	727025	1	1
ANKRD30B	NaN	NaN	NaN	135590	32851	0	0	0	0	50	2	1480583	1	1
ANKRD31	NaN	NaN	NaN	178464	44538	0	0	1	0	50	3	1492270	1	1
ANKRD32	54375	399	20	101829	25116	0	0	0	0	50	0	765908	1	1
ANKRD33	570716	438	22	43654	12506	0	0	0	0	50	1	706966	1	1
ANKRD33B	NaN	NaN	NaN	43836	14547	0	0	0	0	50	2	1462279	1	1
ANKRD34A	NaN	NaN	NaN	42445	15704	0	0	0	0	50	2	1463436	1	1
ANKRD34B	321394	545	38	47021	13390	0	0	0	0	50	1	735995	1	1
ANKRD34C	NaN	NaN	NaN	48022	14846	0	0	0	0	50	2	1462578	1	1
ANKRD35	NaN	NaN	NaN	91039	28223	0	0	0	0	50	2	1475955	1	1
ANKRD36	NaN	NaN	NaN	192894	46020	0	0	0	0	50	2	1493752	1	1
ANKRD36B	390850	455	29	133224	31902	0	0	0	0	50	0	870480	1	1
ANKRD37	173409	422	20	15223	4121	0	0	0	0	50	1	701142	1	1
ANKRD39	822597	392	46	16861	5213	0	0	0	0	50	1	1009931	1	1
ANKRD40	1585602	196	18	33839	9958	0	0	0	0	50	0	886860	1	1
ANKRD42	308108	414	18	37778	9256	0	0	0	0	50	0	895635	1	1
ANKRD43	718028	356	58	46306	18044	0	0	0	0	50	0	639262	1	1
ANKRD44	744603	444	27	88062	23478	0	0	0	0	50	0	783458	1	1
ANKRD45	432542	423	4	25532	6487	0	0	0	0	50	0	678249	1	1
ANKRD46	1144761	214	67	21099	6162	0	0	0	0	50	0	753246	1	1
ANKRD49	341083	589	-7	22464	5928	0	0	0	0	50	0	559273	1	1
ANKRD5	194301	442	-34	72462	19851	0	0	0	0	50	0	859716	1	1
ANKRD50	47412	616	-24	130143	37635	0	0	0	0	50	0	727974	1	1
ANKRD52	2878071	171	46	100178	30121	0	0	0	0	11	1	191971	1	1
ANKRD53	380551	561	27	52416	15600	0	0	0	0	50	1	851331	1	1
ANKRD54	1385064	203	66	27742	8645	0	0	0	0	50	0	676416	1	1
ANKRD55	248990	402	45	57733	15938	0	0	0	0	50	2	724191	1	1
ANKRD56	411278	462	26	69719	23179	0	0	0	0	50	0	922857	1	1
ANKRD57	191347	329	22	46033	15509	0	0	1	0	50	2	705783	1	1
ANKRD58	649508	NaN	73	27183	9867	0	0	0	0	50	1	619736	1	1
ANKRD6	403943	609	43	67379	19396	0	0	0	0	50	1	734656	1	1
ANKRD7	72287	922	-13	24635	6136	0	0	0	0	50	0	926861	1	1
ANKRD9	1673146	191	42	26936	10504	0	0	0	0	50	2	894751	1	1
ANKS1A	664697	304	26	105612	30771	0	0	0	0	50	1	941291	1	1
ANKS1B	149256	941	-9	126555	34554	0	0	0	0	50	0	817570	1	1
ANKS3	717235	194	35	61841	17524	0	0	0	0	50	0	839254	1	1
ANKS4B	402663	575	41	38558	10582	0	0	0	0	50	1	819715	1	1
ANKS6	298496	375	12	79079	25207	0	0	0	0	50	0	811564	1	1
ANKZF1	733837	158	40	66521	20566	0	0	0	0	50	0	655356	1	1
ANLN	332583	329	21	109291	29510	0	0	0	0	50	0	783055	1	1
ANO1	763592	286	35	94627	24752	0	0	0	0	50	0	871845	1	1
ANO2	349024	712	13	95667	25194	0	0	0	0	50	0	849667	1	1
ANO3	20260	970	-20	96018	22932	0	0	0	0	50	0	844194	1	1
ANO4	245388	937	-16	89492	22165	0	0	0	0	50	0	607932	1	1
ANO5	51558	935	-7	88465	21749	0	0	0	0	50	0	887211	1	1
ANO6	313473	719	1	96499	24440	0	0	0	0	50	0	803127	1	1
ANO7	1333138	317	35	89505	26286	0	0	0	0	50	1	894465	1	1
ANO8	842088	211	43	111657	35256	0	0	0	0	50	0	790218	1	1
ANO9	2206786	344	58	74451	20670	0	0	0	0	50	0	881114	1	1
ANP32A	437749	562	32	24466	5720	0	0	0	0	50	1	663273	1	1
ANP32B	466644	269	42	24830	5590	0	0	0	0	50	0	720824	1	1
ANP32C	NaN	NaN	NaN	21918	5538	0	0	0	0	50	2	1453270	1	1
ANP32D	904892	390	11	12181	3224	0	0	0	0	50	0	552357	1	1
ANP32E	1207965	197	39	26481	5928	0	0	0	0	50	0	756210	1	1
ANPEP	934542	212	37	91000	25220	0	0	0	0	50	2	766116	1	1
ANTXR1	338803	288	14	55926	15678	0	0	0	0	50	1	749372	1	1
ANTXR2	62176	905	6	47827	13520	0	0	0	0	50	1	675753	1	1
ANUBL1	111914	603	36	67639	18785	0	0	0	0	50	0	703170	1	1
ANXA1	247950	411	-15	33774	8697	0	0	0	0	50	0	671268	1	1
ANXA10	55532	402	-16	32188	7553	0	0	0	0	50	0	783497	1	1
ANXA11	366637	626	7	47372	14014	0	0	0	0	50	0	729079	1	1
ANXA13	492587	192	12	34632	9048	0	0	0	0	50	1	854633	1	1
ANXA2	431518	299	14	35152	8840	0	0	0	0	50	2	693667	1	1
ANXA3	243621	351	21	31837	7943	0	0	0	0	50	1	758524	1	1
ANXA4	864962	193	50	31317	8229	0	0	0	0	50	0	816309	1	1
ANXA5	311234	440	9	31109	8320	0	0	0	0	50	2	729885	1	1
ANXA6	926280	300	41	65858	16900	0	0	0	0	50	0	866281	1	1
ANXA7	847821	249	45	46150	13052	0	0	0	0	50	0	890799	1	1
ANXA8	NaN	NaN	NaN	64506	15678	0	0	0	0	50	2	1463410	1	1
ANXA8L1	NaN	NaN	NaN	64506	15678	0	0	0	0	50	2	1463410	1	1
ANXA8L2	NaN	NaN	NaN	32253	7839	0	0	0	0	50	2	1455571	1	1
ANXA9	1621279	172	30	32929	9425	0	0	0	0	50	0	707902	1	1
AOAH	247838	600	15	67990	15860	0	0	0	0	50	0	694382	1	1
AOC2	1631295	190	28	67405	21710	0	0	0	0	50	0	780832	1	1
AOC3	1629499	190	23	68432	21424	0	0	0	0	50	0	866281	1	1
AP1AR	181002	351	22	29731	7124	0	0	0	0	50	2	770679	1	1
AP1B1	849693	251	36	88946	25636	0	0	0	0	50	1	789230	1	1
AP1G1	460697	NaN	24	78741	21489	0	0	0	0	50	0	852605	1	1
AP1G2	1250373	553	35	72579	22659	0	0	0	0	2	0	48243	1	1
AP1M1	814131	255	26	41782	11102	0	0	0	0	50	0	912470	1	1
AP1M2	2036812	226	23	40586	10816	0	0	1	0	8	1	101790	1	1
AP1S1	1044715	199	39	15366	3861	0	0	0	0	50	0	678444	1	1
AP1S2	170722	NaN	47	15223	3809	0	0	0	0	50	0	735683	1	1
AP1S3	263604	197	16	15210	3549	0	0	0	0	50	1	661271	1	1
AP2A1	1686482	172	42	90844	27170	0	0	0	0	50	0	739128	1	1
AP2A2	1509286	246	48	87672	25584	0	0	0	0	50	0	793507	1	1
AP2B1	715620	196	9	89765	24895	0	0	0	0	50	2	802178	1	1
AP2M1	1456939	257	45	42848	9763	0	0	0	0	50	0	780637	1	1
AP2S1	1217560	186	44	13832	3523	0	0	0	0	50	0	854126	1	1
AP3B1	262852	592	40	104468	27703	0	0	0	0	50	1	669058	1	1
AP3B2	509813	608	16	98852	28795	0	0	0	0	50	1	753441	1	1
AP3D1	1712606	216	30	115154	30550	0	0	0	0	50	1	852072	1	1
AP3M1	776926	227	49	39624	10647	0	0	0	0	50	0	704353	1	1
AP3M2	580110	382	45	39429	10842	0	0	0	0	50	0	778102	1	1
AP3S1	380598	759	6	18785	4693	0	0	0	0	50	1	903331	1	1
AP3S2	952242	212	33	18564	4914	0	0	0	0	50	0	755794	1	1
AP4B1	335231	545	13	68835	19383	0	0	0	0	50	0	722267	1	1
AP4E1	343136	355	34	107744	28600	0	0	1	0	50	1	644410	1	1
AP4M1	1401098	205	46	42484	12896	0	0	0	0	50	1	910273	1	1
AP4S1	432061	238	23	19812	4797	0	0	0	0	50	0	681668	1	1
APAF1	488214	461	11	120458	29731	0	0	0	0	50	0	762047	1	1
APBA1	209495	673	-5	78117	21801	0	0	0	0	50	0	851461	1	1
APBA2	161108	927	-21	70616	19006	0	0	0	0	50	0	822939	1	1
APBA3	2144458	206	34	52078	16874	0	0	0	0	50	0	702000	1	1
APBB1	424837	471	17	65767	19448	0	0	0	0	50	0	742729	1	1
APBB1IP	236125	536	19	62400	17589	0	0	0	0	11	0	205023	1	1
APBB2	227095	394	39	71669	19591	0	0	0	0	50	1	726908	1	1
APBB3	706371	319	29	45955	13559	0	0	0	0	50	1	860470	1	1
APC	247811	399	28	262119	72969	0	0	0	0	11	0	186355	1	1
APC2	2352825	221	38	199940	71812	0	0	0	0	34	0	456105	1	1
APCDD1	219220	604	2	47307	13572	0	0	0	0	50	0	708435	1	1
APCDD1L	1027182	485	24	43979	15223	0	0	0	0	50	0	848354	1	1
APCS	492825	646	-4	20540	5902	0	0	0	0	50	0	783016	1	1
APEH	1551582	271	48	69550	19487	0	0	0	0	50	0	800579	1	1
APEX1	464497	395	17	29406	8541	0	0	0	0	50	0	780936	1	1
APEX2	245504	NaN	8	47489	14092	0	0	0	0	50	0	847028	1	1
APH1A	1213150	197	38	24544	7865	0	0	0	0	50	0	769470	1	1
APH1B	450620	272	49	24011	7033	0	0	0	0	50	0	781859	1	1
API5	349378	924	-23	50388	13065	0	0	0	0	50	0	791115	1	1
APIP	650532	399	1	24037	5993	0	0	0	0	50	1	662987	1	1
APITD1	771199	383	28	20449	5057	0	0	0	0	50	0	893906	1	1
APLF	227462	617	22	48997	12311	0	0	0	0	50	0	659893	1	1
APLN	340263	NaN	46	7124	2314	0	0	0	0	50	1	754273	1	1
APLNR	929334	250	-20	34216	10361	0	0	0	0	50	0	763425	1	1
APLP1	1060028	321	47	60476	18304	0	0	0	0	45	0	641303	1	1
APLP2	624855	203	15	73424	18616	0	0	0	0	50	1	728364	1	1
APOA1	421374	323	39	24947	6955	0	0	0	0	50	0	675701	1	1
APOA1BP	2049505	180	37	26572	8099	0	0	0	0	50	0	696592	1	1
APOA2	728669	234	37	9620	2665	0	0	0	0	50	1	822666	1	1
APOA4	419339	326	36	36322	10439	0	0	0	0	50	0	772499	1	1
APOA5	419339	326	36	33735	9828	0	0	0	0	50	0	772499	1	1
APOB	222162	698	-11	421395	116961	0	0	0	0	7	0	181662	1	1
APOB48R	NaN	NaN	NaN	97799	30316	0	0	0	0	50	2	1478048	1	1
APOBEC1	237142	672	14	22789	5642	0	0	0	0	50	0	828269	1	1
APOBEC2	145501	611	37	20878	5759	0	0	0	0	50	0	738400	1	1
APOBEC3A	1413709	372	44	19058	4966	0	0	0	0	50	0	980603	1	1
APOBEC3B	1413709	372	44	36699	9282	0	0	0	0	50	0	980603	1	1
APOBEC3C	1386387	372	71	18408	4446	0	0	0	0	50	0	586456	1	1
APOBEC3D	1386387	372	71	36946	9269	0	0	0	0	50	0	586456	1	1
APOBEC3F	1386387	372	71	40001	10036	0	0	0	0	50	0	586456	1	1
APOBEC3G	1386387	372	71	37180	8957	0	0	0	0	50	0	586456	1	1
APOBEC3H	1225154	223	75	20124	4602	0	0	0	0	50	0	688337	1	1
APOBEC4	NaN	NaN	NaN	33982	9230	0	0	0	0	50	2	1456962	1	1
APOC1	1003719	196	6	8099	2197	0	0	0	0	50	1	625027	1	1
APOC2	1003719	196	6	9685	2717	0	0	0	0	50	1	625027	1	1
APOC3	421374	323	39	9542	2626	0	0	0	0	50	0	675701	1	1
APOC4	1003719	196	6	12051	3315	0	0	0	0	50	1	625027	1	1
APOD	794351	315	38	17927	4927	0	0	0	0	50	1	836381	1	1
APOE	1003719	196	6	28587	9087	0	0	0	0	50	1	625027	1	1
APOF	2869106	184	52	29263	9230	0	0	0	0	50	1	925236	1	1
APOH	135537	178	-23	33124	8567	0	0	0	0	50	1	670800	1	1
APOL1	1237332	331	42	38649	10842	0	0	0	0	50	1	912678	1	1
APOL2	1237332	331	42	30849	9165	0	0	0	0	50	1	912678	1	1
APOL3	1228837	331	13	36283	11258	0	0	0	0	50	0	815113	1	1
APOL4	1233084	331	28	34645	8489	0	0	0	0	50	0	790504	1	1
APOL5	1161568	376	-43	39611	11791	0	0	0	0	50	0	721266	1	1
APOL6	936853	205	-13	31330	9230	0	0	0	0	50	0	653445	1	1
APOLD1	767161	129	35	24453	8814	0	0	0	0	50	0	825435	1	1
APOM	2517236	193	20	18174	4797	0	0	0	0	50	0	1002937	1	1
APOO	509881	NaN	41	19565	4966	0	0	0	0	50	0	983944	1	1
APOOL	83775	NaN	-12	25766	7033	0	0	0	0	50	0	857662	1	1
APP	529745	793	-13	73762	19097	0	0	0	0	50	1	640796	1	1
APPBP2	372707	242	7	56056	14378	0	0	0	0	50	0	818948	1	1
APPL1	427002	389	33	69147	17277	0	0	0	0	50	0	724893	1	1
APPL2	233879	387	30	64324	16601	0	0	0	0	50	0	917501	1	1
APRT	813333	189	51	16432	5447	0	0	0	0	50	0	752492	1	1
APTX	833170	286	-5	34671	8619	0	0	0	0	50	0	677300	1	1
AQP1	402058	568	10	31889	10270	0	0	0	0	50	0	659724	1	1
AQP10	1653296	236	29	27027	9165	0	0	0	0	50	1	838526	1	1
AQP11	603969	401	30	24518	7618	0	0	0	0	50	1	721344	1	1
AQP12A	1077835	446	25	26208	8970	0	0	0	0	50	2	946101	1	1
AQP12B	1077835	446	25	26975	9451	0	0	0	0	50	2	946101	1	1
AQP2	1033911	220	48	23881	8489	0	0	0	0	50	1	767403	1	1
AQP3	1001877	166	4	26624	8515	0	0	0	0	50	1	621881	1	1
AQP4	65361	639	-33	29939	8749	0	0	0	0	50	0	800007	1	1
AQP5	1033911	220	48	23491	8099	0	0	0	0	50	1	767403	1	1
AQP6	1033911	220	48	24817	8762	0	0	0	0	50	1	767403	1	1
AQP7	982082	163	21	31590	9711	0	0	0	0	50	0	649714	1	1
AQP8	189953	551	12	23634	7878	0	0	0	0	50	0	828178	1	1
AQP9	242649	602	4	27235	8177	0	0	0	0	50	0	658632	1	1
AQPEP	372067	763	17	93847	25064	0	0	0	0	15	0	186550	1	1
AQR	468734	288	-5	142272	36894	0	0	0	0	50	1	753636	1	1
AR	106188	NaN	-7	84656	25051	0	0	0	0	50	0	748332	1	1
ARAF	775214	NaN	38	56810	16549	0	0	0	0	50	0	860379	1	1
ARAP1	637045	234	54	134329	40586	0	0	0	0	50	1	866307	1	1
ARAP2	28107	1066	26	163033	41288	0	0	0	0	50	0	780468	1	1
ARAP3	771583	353	25	141895	43862	0	0	0	0	50	1	839605	1	1
ARC	300961	567	26	35659	10790	0	0	0	0	50	0	893035	1	1
ARCN1	1359480	167	47	48256	13052	0	0	0	0	50	1	837707	1	1
AREG	172071	NaN	10	48308	12454	0	0	0	0	50	0	896493	1	1
ARF1	702621	391	5	17290	4628	0	0	0	0	50	1	621309	1	1
ARF3	1737773	214	55	17251	4667	0	0	0	0	50	2	678223	1	1
ARF4	703082	422	29	17329	4628	0	0	0	0	50	0	785317	1	1
ARF5	411207	619	-7	17251	4784	0	0	0	0	50	0	549523	1	1
ARF6	680412	174	41	15873	4719	0	0	0	0	50	1	776477	1	1
ARFGAP1	1278630	332	62	40664	10153	0	0	0	0	50	1	624637	1	1
ARFGAP2	1206881	273	24	49998	13494	0	0	0	0	50	0	754130	1	1
ARFGAP3	722786	187	60	50089	12740	0	0	0	0	50	1	687596	1	1
ARFGEF1	307618	642	26	177242	45136	0	0	0	0	50	0	746603	1	1
ARFGEF2	808420	174	49	170586	44304	0	0	0	0	50	0	636259	1	1
ARFIP1	218185	385	33	35581	9425	0	0	0	0	50	0	767338	1	1
ARFIP2	424988	469	20	31733	9373	0	0	0	0	50	0	913497	1	1
ARFRP1	1126597	202	36	19526	5239	0	0	0	0	50	0	671255	1	1
ARG1	147816	864	7	30030	8931	0	0	0	0	50	2	718016	1	1
ARG2	481915	260	42	32851	9776	0	0	0	0	50	0	641498	1	1
ARGFX	289448	613	18	29432	8164	0	0	0	0	50	0	908232	1	1
ARGLU1	169398	1237	11	25350	7176	0	0	0	0	50	0	724165	1	1
ARHGAP1	939971	176	44	42068	11284	0	0	0	0	50	1	635804	1	1
ARHGAP10	75227	678	22	76232	19279	0	0	0	0	50	0	774319	1	1
ARHGAP11A	244857	383	1	96460	25961	0	0	0	0	50	1	963313	1	1
ARHGAP11B	220858	693	10	25389	6903	0	0	0	0	50	1	732810	1	1
ARHGAP12	359237	346	25	81575	20332	0	0	0	0	50	0	850226	1	1
ARHGAP15	57425	639	11	46345	11375	0	0	0	0	50	2	802256	1	1
ARHGAP17	272834	185	22	82511	23725	0	0	0	0	50	0	821574	1	1
ARHGAP18	73209	550	26	63726	16224	0	0	0	0	50	1	851942	1	1
ARHGAP19	945635	397	26	47151	12558	0	0	0	0	50	2	844766	1	1
ARHGAP20	146681	501	-5	110890	30758	0	0	0	0	50	0	773565	1	1
ARHGAP21	164987	309	-3	182052	50895	0	0	0	0	40	0	689650	1	1
ARHGAP22	NaN	NaN	NaN	63596	19591	0	0	0	0	50	2	1467323	1	1
ARHGAP23	NaN	NaN	NaN	125593	41249	0	0	0	0	50	2	1488981	1	1
ARHGAP24	29589	739	13	74607	18876	0	0	0	0	50	1	835354	1	1
ARHGAP25	385975	470	20	62465	16276	0	0	0	0	50	0	1043328	1	1
ARHGAP26	156598	456	38	78845	20020	0	0	1	0	50	1	865566	1	1
ARHGAP27	754492	194	21	51883	14690	0	0	0	0	50	0	797186	1	1
ARHGAP28	241496	281	-28	59202	15444	0	0	0	0	50	0	859339	1	1
ARHGAP29	466144	327	-9	120029	31057	0	0	0	0	50	1	713661	1	1
ARHGAP30	689033	250	23	100412	30238	0	0	0	0	50	0	696397	1	1
ARHGAP31	265987	585	23	131404	39377	0	0	0	0	50	0	884962	1	1
ARHGAP32	195815	546	-11	192166	55406	0	0	0	0	50	1	809042	1	1
ARHGAP33	1151198	321	30	114283	39533	0	0	0	0	50	0	697489	1	1
ARHGAP36	65931	NaN	13	50583	15093	0	0	0	0	50	1	834925	1	1
ARHGAP39	1706542	291	12	101868	30303	0	0	0	0	4	0	83070	1	1
ARHGAP4	2328608	NaN	27	91169	27820	0	0	0	0	50	0	961961	1	1
ARHGAP40	NaN	NaN	NaN	62608	18629	0	0	0	0	50	2	1466361	1	1
ARHGAP42	NaN	NaN	NaN	84487	21554	0	0	0	0	50	2	1469286	1	1
ARHGAP5	153921	392	1	140231	36400	0	0	0	0	43	1	792545	1	1
ARHGAP6	65396	NaN	34	92638	27989	0	0	0	0	50	0	766311	1	1
ARHGAP8	NaN	NaN	NaN	45851	13117	0	0	0	0	50	2	1460849	1	1
ARHGAP9	1347802	194	32	67275	21021	0	0	0	0	50	1	760240	1	1
ARHGDIA	3798594	211	19	19669	5096	0	0	0	0	50	0	674739	1	1
ARHGDIB	360900	426	8	19487	4927	0	0	0	0	50	1	732160	1	1
ARHGDIG	1340678	205	43	20878	6422	0	0	0	0	50	0	798213	1	1
ARHGEF1	1255704	364	28	87360	25662	0	0	0	0	50	1	765167	1	1
ARHGEF10	100967	551	-24	127140	34593	0	0	0	0	50	0	922454	1	1
ARHGEF10L	375252	279	30	119184	34944	0	0	0	0	50	0	899067	1	1
ARHGEF11	958228	350	36	146471	42640	0	0	0	0	50	0	814203	1	1
ARHGEF12	264872	312	25	148421	38662	0	0	0	0	50	1	792727	1	1
ARHGEF15	772200	257	20	75231	25623	0	0	0	0	50	0	631761	1	1
ARHGEF16	248448	483	21	66014	19240	0	0	0	0	50	0	829348	1	1
ARHGEF17	601834	218	54	184431	60255	0	0	0	0	50	1	785356	1	1
ARHGEF18	613770	308	30	108251	32071	0	0	0	0	50	1	800826	1	1
ARHGEF19	824719	186	40	73333	22958	0	0	0	0	50	1	639808	1	1
ARHGEF2	1880483	213	32	91247	27508	0	0	0	0	50	0	869232	1	1
ARHGEF3	380604	450	43	59956	15665	0	0	0	0	50	0	779636	1	1
ARHGEF33	NaN	NaN	NaN	82017	22308	0	0	0	0	50	2	1470040	1	1
ARHGEF35	NaN	NaN	NaN	44499	12402	0	0	0	0	50	2	1460134	1	1
ARHGEF37	609620	185	37	62400	18564	0	0	0	0	50	0	735839	1	1
ARHGEF38	233591	486	15	21112	5096	0	0	0	0	50	0	620399	1	1
ARHGEF4	547548	369	13	67925	18304	0	0	0	0	50	1	814476	1	1
ARHGEF5	189369	838	0	145301	43849	0	0	0	0	50	0	671957	1	1
ARHGEF7	405184	579	30	85150	23114	0	0	0	0	50	1	662766	1	1
ARID2	820796	602	10	168350	49582	0	0	0	0	50	2	882102	1	1
ARID3A	2292363	206	44	53651	16939	0	0	0	0	50	0	735787	1	1
ARID3B	655453	206	59	51402	15483	0	0	0	0	50	1	686920	1	1
ARID3C	731413	298	51	37089	12129	0	0	0	0	50	0	593814	1	1
ARID4A	290710	552	36	121680	29094	0	0	0	0	50	1	654225	1	1
ARID4B	550877	297	22	126412	30797	0	0	0	0	50	0	799435	1	1
ARID5A	872383	360	47	53911	16718	0	0	0	0	50	2	995891	1	1
ARID5B	81587	388	20	110071	30446	0	0	0	0	50	0	745875	1	1
ARIH1	1093921	432	37	54600	12714	0	0	0	0	50	1	800514	1	1
ARIH2	1818938	241	37	48880	11102	0	0	0	0	50	0	827567	1	1
ARL1	283715	649	2	17628	4446	0	0	0	0	50	1	679393	1	1
ARL10	563059	347	37	22100	7111	0	0	0	0	50	2	812838	1	1
ARL11	425192	296	62	17615	5590	0	0	0	0	50	1	672386	1	1
ARL13B	85478	1310	-13	41418	10335	0	0	0	0	50	0	885287	1	1
ARL14	493112	396	8	17693	4888	0	0	0	0	50	0	1007526	1	1
ARL15	83263	721	5	19591	5096	0	0	0	0	50	1	905749	1	1
ARL16	3745109	205	30	18070	5798	0	0	0	0	50	0	653302	1	1
ARL17A	NaN	NaN	NaN	41561	11089	0	0	0	0	50	2	1458821	1	1
ARL17B	372453	231	22	20787	5538	0	0	0	0	50	0	779740	1	1
ARL2	3151458	209	52	17329	5018	0	0	0	0	50	1	867412	1	1
ARL2BP	717872	149	48	16081	3887	0	0	0	0	50	1	652691	1	1
ARL3	878626	180	27	17589	4602	0	0	0	0	50	0	742612	1	1
ARL4A	120492	469	-11	18577	5213	0	0	0	0	50	1	968773	1	1
ARL4C	121224	608	15	17329	5252	0	0	0	0	50	1	761085	1	1
ARL4D	1147224	172	1	17784	6006	0	0	0	0	50	1	599092	1	1
ARL5A	269131	610	15	17498	4342	0	0	0	0	50	0	787072	1	1
ARL5B	74299	539	-5	17433	4407	0	0	0	0	50	0	819520	1	1
ARL5C	NaN	NaN	NaN	17368	4433	0	0	0	0	50	2	1452165	1	1
ARL6	89238	731	-5	18512	4459	0	0	0	0	50	0	869180	1	1
ARL6IP1	739644	279	45	19500	5226	0	0	0	0	50	0	707460	1	1
ARL6IP4	1093113	196	47	33800	11089	0	0	0	0	50	2	843349	1	1
ARL6IP5	264082	443	20	17602	4823	0	0	0	0	50	0	842504	1	1
ARL6IP6	275277	716	6	20553	6474	0	0	0	0	50	0	737568	1	1
ARL8A	649164	297	34	18304	4511	0	0	0	0	50	0	823784	1	1
ARL8B	263029	325	22	18252	4563	0	0	0	0	50	2	798837	1	1
ARL9	662749	594	27	11687	3211	0	0	0	0	50	2	848445	1	1
ARMC1	145894	455	4	26702	7345	0	0	0	0	50	1	637325	1	1
ARMC10	594757	579	34	31798	9386	0	0	0	0	50	1	855270	1	1
ARMC2	414039	431	32	82030	22178	0	0	0	0	50	0	711633	1	1
ARMC3	164960	449	12	82862	22048	0	0	0	0	50	0	745589	1	1
ARMC4	125789	454	-4	98384	26845	0	0	0	0	50	0	832884	1	1
ARMC5	839076	558	11	88387	34073	0	0	0	0	50	1	825006	1	1
ARMC6	1327004	215	24	43537	13364	0	0	0	0	50	1	809393	1	1
ARMC7	1511891	168	25	17901	5694	0	0	0	0	50	0	681382	1	1
ARMC8	199119	358	18	65702	17446	0	0	0	0	5	0	63284	1	1
ARMC9	1157442	394	41	64259	16783	0	0	0	0	50	0	656032	1	1
ARMCX1	329999	NaN	8	40950	12168	0	0	0	0	50	0	776165	1	1
ARMCX2	300391	NaN	31	55692	18369	0	0	0	0	50	1	916058	1	1
ARMCX3	329999	NaN	8	34567	9893	0	0	0	0	50	0	776165	1	1
ARMCX5	95798	NaN	27	51025	14378	0	0	0	0	50	2	878800	1	1
ARMCX6	329999	NaN	8	27638	7579	0	0	0	0	50	0	776165	1	1
ARMS2	252955	279	5	9711	3159	0	0	0	0	50	0	789971	1	1
ARNT	1787393	188	33	74997	20709	0	0	0	0	50	0	750867	1	1
ARNT2	365740	542	8	68458	18356	0	0	0	0	50	0	743119	1	1
ARNTL	296688	414	13	60424	15977	0	0	0	0	50	1	765843	1	1
ARNTL2	544579	377	40	61750	15392	0	0	0	0	50	0	718159	1	1
ARPC1A	903923	263	51	35724	9087	0	0	0	0	50	1	857935	1	1
ARPC1B	903923	263	51	35503	9542	0	0	0	0	50	1	857935	1	1
ARPC2	724341	197	30	29536	7319	0	0	0	0	50	2	664040	1	1
ARPC3	964525	206	50	17901	4056	0	0	0	0	50	2	706290	1	1
ARPC4	953772	264	43	16471	4082	0	0	0	0	50	1	992277	1	1
ARPC5	608114	407	24	14261	3991	0	0	0	0	50	1	866086	1	1
ARPC5L	1125524	207	41	14404	4160	0	0	0	0	50	0	687180	1	1
ARPM1	397180	820	-9	34099	9698	0	0	0	0	50	1	758888	1	1
ARPP19	469724	386	15	10712	2821	0	0	0	0	50	0	725127	1	1
ARPP21	3796	1075	-21	77662	20696	0	0	0	0	50	0	754286	1	1
ARR3	188610	NaN	39	37596	10491	0	0	0	0	50	3	752362	1	1
ARRB1	740999	252	46	40378	10985	0	0	0	0	50	0	799669	1	1
ARRB2	1272092	222	28	39195	10959	0	0	0	0	50	0	872482	1	1
ARRDC1	1197708	478	45	39338	12610	0	0	0	0	50	0	1022593	1	1
ARRDC2	1291557	226	34	43810	15197	0	0	0	0	50	1	679939	1	1
ARRDC3	51436	334	5	39104	10543	0	0	0	0	50	2	710658	1	1
ARRDC4	32065	851	-57	38649	11466	0	0	0	0	50	2	741806	1	1
ARRDC5	777835	173	42	31512	8931	0	0	0	0	50	1	858481	1	1
ARSA	1073094	203	43	45188	15496	0	0	0	0	50	0	845429	1	1
ARSB	203299	452	50	49725	15054	0	0	0	0	50	0	1046604	1	1
ARSD	191640	NaN	18	59553	17316	0	0	0	0	30	0	425412	1	1
ARSE	191640	NaN	18	54860	15730	0	0	0	0	30	0	425412	1	1
ARSF	217524	NaN	-11	55185	15522	0	0	0	0	50	0	847301	1	1
ARSG	745529	225	-8	48906	14196	0	0	0	0	50	0	701441	1	1
ARSH	218545	NaN	-4	52338	14742	0	0	0	0	50	1	686374	1	1
ARSI	954044	220	46	50869	15977	0	0	0	0	50	0	998504	1	1
ARSJ	100364	497	15	54847	15509	0	0	0	0	50	1	712101	1	1
ARSK	310860	359	29	50609	13312	0	0	0	0	50	0	695942	1	1
ART1	537999	403	23	29822	9178	0	0	0	0	50	0	819611	1	1
ART3	507519	322	41	38194	9152	0	0	0	0	50	1	689026	1	1
ART4	340728	578	-4	29146	8099	0	0	0	0	50	0	574899	1	1
ART5	537999	403	23	26663	8125	0	0	0	0	50	0	819611	1	1
ARTN	877978	214	35	21866	8710	0	0	0	0	50	1	721149	1	1
ARV1	376655	616	12	26078	6604	0	0	0	0	50	0	746278	1	1
ARVCF	616246	217	37	86671	28808	0	0	0	0	50	0	830869	1	1
ARX	252498	NaN	11	49296	17199	0	0	0	0	50	0	864786	1	1
AS3MT	711862	192	45	36166	9425	0	0	0	0	50	1	819507	1	1
ASAH1	366238	474	20	43160	11167	0	0	0	0	50	0	852488	1	1
ASAH2	377258	409	14	73957	20462	0	0	0	0	50	0	841516	1	1
ASAH2B	131929	508	36	15912	4368	0	0	0	0	50	0	751452	1	1
ASAM	713809	216	13	34346	10348	0	0	0	0	50	1	892099	1	1
ASAP2	661229	340	34	96447	25584	0	0	0	0	50	0	1056653	1	1
ASAP3	1050777	159	29	86203	24206	0	0	0	0	50	0	675922	1	1
ASB1	246085	513	27	30446	9568	0	0	0	0	50	0	637871	1	1
ASB10	611046	337	38	49322	16861	0	0	0	0	50	0	661856	1	1
ASB11	201763	NaN	43	33943	9659	0	0	0	0	50	0	878579	1	1
ASB12	57924	NaN	2	27820	8606	0	0	0	0	50	0	961298	1	1
ASB13	761737	299	21	25844	7657	0	0	0	0	50	1	880958	1	1
ASB14	399197	454	29	56160	15366	0	0	0	0	50	0	852735	1	1
ASB15	86799	644	-7	55029	15288	0	0	0	0	50	0	817635	1	1
ASB16	930750	175	41	47996	9295	0	0	0	0	50	1	795821	1	1
ASB17	140995	603	-11	27391	7631	0	0	0	0	50	0	837837	1	1
ASB18	121194	481	8	41730	13650	0	0	0	0	50	0	770809	1	1
ASB2	200153	600	30	53781	16107	0	0	0	0	50	0	710840	1	1
ASB3	NaN	NaN	NaN	49387	13169	0	0	0	0	50	2	1460901	1	1
ASB4	176832	333	14	41938	11297	0	0	0	0	50	0	708279	1	1
ASB5	134663	504	-4	30888	8736	0	0	0	0	50	0	844701	1	1
ASB6	794813	198	40	40144	10010	0	0	0	0	50	1	671463	1	1
ASB7	290809	374	-9	29679	8346	0	0	0	0	50	1	798369	1	1
ASB8	511392	352	32	26273	8008	0	0	0	0	50	2	683943	1	1
ASB9	204248	NaN	17	28834	7826	0	0	0	0	50	1	776971	1	1
ASCC1	761166	140	40	34775	8515	0	0	0	0	50	0	781963	1	1
ASCC2	849790	182	33	72371	19279	0	0	0	0	50	0	913263	1	1
ASCL1	21203	964	3	21294	6591	0	0	0	0	50	0	848159	1	1
ASCL2	NaN	NaN	NaN	16393	6461	0	0	0	0	50	2	1454193	1	1
ASCL3	548433	243	21	16653	4875	0	0	0	0	50	0	757432	1	1
ASCL4	119393	805	22	15158	5200	0	0	0	0	50	0	781612	1	1
ASF1A	116680	856	16	15808	4316	0	0	0	0	50	0	683540	1	1
ASF1B	1034381	321	36	18798	5421	0	0	0	0	50	2	807443	1	1
ASGR1	1682013	348	15	28171	7241	0	0	0	0	18	0	238914	1	1
ASGR2	1682013	348	15	30251	7501	0	0	0	0	18	0	238914	1	1
ASH1L	1960625	247	33	275340	75777	0	0	0	0	50	1	795379	1	1
ASH2L	671169	258	34	60333	15756	0	0	0	0	50	0	709540	1	1
ASIP	962066	151	50	12246	3705	0	0	0	0	50	1	830336	1	1
ASL	477708	345	38	44473	12428	0	0	0	0	50	1	699296	1	1
ASMT	NaN	NaN	NaN	35360	9880	0	0	0	0	50	2	1457612	1	1
ASMTL	NaN	NaN	NaN	60476	17563	0	0	0	0	50	2	1465295	1	1
ASNA1	1959466	226	29	32968	8879	0	0	0	0	50	1	855556	1	1
ASNS	455051	636	0	53638	13832	0	0	0	0	50	0	822640	1	1
ASNSD1	418427	511	16	59176	16640	0	0	0	0	50	0	861315	1	1
ASPA	403115	442	6	30017	7657	0	0	0	0	50	0	648336	1	1
ASPDH	762018	517	35	26845	8723	0	0	0	0	50	1	836329	1	1
ASPG	622747	468	20	52923	17433	0	0	0	0	50	1	732459	1	1
ASPH	423823	377	14	97760	23179	0	0	0	0	50	0	821977	1	1
ASPHD1	NaN	NaN	NaN	34164	11895	0	0	0	0	50	2	1459627	1	1
ASPHD2	163136	553	-46	33670	9932	0	0	0	0	50	1	739505	1	1
ASPN	NaN	NaN	NaN	36465	9204	0	0	0	0	50	2	1456936	1	1
ASPRV1	844060	221	37	30550	9698	0	0	0	0	50	1	639314	1	1
ASPSCR1	3814891	211	28	51441	15873	0	0	0	0	50	0	651651	1	1
ASRGL1	3053973	413	49	28743	8502	0	0	0	0	50	0	729313	1	1
ASS1	502828	260	35	40118	10387	0	0	0	0	50	0	827333	1	1
ASTE1	313779	586	19	63427	16757	0	0	0	0	50	0	1017627	1	1
ASTL	821367	251	45	39546	12207	0	0	0	0	50	0	707616	1	1
ASTN2	63839	937	-17	126126	36855	0	0	0	0	50	0	730782	1	1
ASXL1	780777	242	57	140010	42432	0	0	0	0	50	2	780871	1	1
ASXL2	602691	287	31	130949	38779	0	0	0	0	50	1	908804	1	1
ASXL3	7579	1014	-10	204932	59995	0	0	0	0	50	0	834340	1	1
ASZ1	262404	394	-1	45981	11661	0	0	0	0	50	1	934648	1	1
ATAD1	335357	169	45	34775	8983	0	0	0	0	50	0	666744	1	1
ATAD2	544857	225	30	132496	34463	0	0	0	0	50	1	740662	1	1
ATAD2B	233701	431	27	138567	36348	0	0	0	0	50	0	627874	1	1
ATAD3A	1714469	248	27	59332	17381	0	0	0	0	50	1	786968	1	1
ATAD3B	1714469	248	27	60294	18057	0	0	0	0	50	1	786968	1	1
ATAD3C	1725369	187	27	38636	11284	0	0	0	0	50	0	787540	1	1
ATAD5	605762	209	25	175097	44200	0	0	0	0	50	1	853463	1	1
ATCAY	2187414	201	34	35932	9464	0	0	0	0	50	0	875641	1	1
ATE1	233024	427	-3	54288	13416	0	0	0	0	50	0	713791	1	1
ATF1	665195	250	42	25389	7371	0	0	0	0	50	1	878553	1	1
ATF2	347113	641	24	47450	13624	0	0	0	0	50	0	817141	1	1
ATF3	418310	224	22	18993	5187	0	0	0	0	50	0	693173	1	1
ATF4	721040	467	72	32539	9035	0	0	0	0	50	1	738842	1	1
ATF5	1679101	205	45	24505	8762	0	0	0	0	50	2	759018	1	1
ATF6	407279	420	16	63388	17537	0	0	0	0	50	0	604721	1	1
ATF6B	2170336	224	32	64870	20228	0	0	0	0	50	0	925236	1	1
ATF7	1542915	154	52	45565	14066	0	0	0	0	50	0	766311	1	1
ATF7IP	339265	882	12	116545	34346	0	0	0	0	50	0	624923	1	1
ATF7IP2	199617	364	9	64688	16783	0	0	0	0	50	0	765739	1	1
ATG10	156562	717	25	21632	5317	0	0	0	0	6	0	127491	1	1
ATG16L1	427221	155	31	58123	15665	0	0	0	0	50	0	706355	1	1
ATG16L2	528497	281	50	57993	17277	0	0	0	0	50	0	604591	1	1
ATG2B	327434	501	14	196365	53274	0	0	0	0	50	0	793156	1	1
ATG3	302697	636	41	31096	7475	0	0	0	0	50	2	529425	1	1
ATG4A	201673	NaN	25	39182	9373	0	0	0	0	50	1	700115	1	1
ATG4B	1268313	406	27	38961	9828	0	0	0	0	50	1	676988	1	1
ATG4C	220392	415	5	44343	10920	0	0	0	0	50	0	654784	1	1
ATG4D	2036812	226	23	43654	13403	0	0	0	0	50	3	815386	1	1
ATG5	181529	390	32	27053	6331	0	0	0	0	50	0	847301	1	1
ATG7	184628	425	30	67002	18174	0	0	0	0	50	0	946959	1	1
ATG9A	773232	177	36	77363	23101	0	0	0	0	50	0	729027	1	1
ATG9B	622098	373	41	82394	27898	0	0	0	0	50	0	918060	1	1
ATHL1	1463610	437	24	67379	20995	0	0	0	0	50	0	665847	1	1
ATIC	530312	531	12	56173	15548	0	0	0	0	50	1	803998	1	1
ATL1	483990	295	43	53690	13741	0	0	0	0	50	1	787540	1	1
ATL2	808394	366	25	59085	15483	0	0	0	0	50	0	967720	1	1
ATM	415837	582	16	293761	73580	0	0	0	0	50	0	851929	1	1
ATMIN	231500	284	4	74776	22178	0	0	0	0	50	1	788567	1	1
ATN1	2704950	211	47	104403	36192	0	0	0	0	50	1	971412	1	1
ATOH1	58522	802	24	31395	10140	0	0	0	0	50	0	685802	1	1
ATOH7	459384	251	17	13546	4355	0	0	0	0	50	1	834782	1	1
ATOH8	1105419	181	46	27885	10101	0	0	0	0	50	1	793650	1	1
ATOX1	584468	406	46	6890	1729	0	0	0	0	30	0	547131	1	1
ATP10A	104149	1350	-49	137163	41457	0	0	0	0	50	2	1007838	1	1
ATP10B	170108	904	11	136669	37817	0	0	0	0	50	0	777816	1	1
ATP10D	93423	528	29	133770	36621	0	0	0	0	50	1	926770	1	1
ATP11A	585697	416	45	116116	31070	0	0	0	0	50	0	943748	1	1
ATP11B	228613	559	16	112931	29419	0	0	0	0	19	0	251199	1	1
ATP11C	66616	NaN	18	110721	28977	0	0	0	0	50	1	761605	1	1
ATP12A	467468	619	40	98501	27313	0	0	0	0	50	1	881166	1	1
ATP13A1	768855	418	-10	110630	34333	0	0	0	0	50	0	627835	1	1
ATP13A2	678965	221	52	115973	35854	0	0	1	0	50	1	765375	1	1
ATP13A3	324325	269	27	117624	30771	0	0	0	0	50	0	943839	1	1
ATP13A4	144678	776	-2	113789	30784	0	0	0	0	50	0	767403	1	1
ATP1A1	616485	464	18	96850	26936	0	0	0	0	50	1	708968	1	1
ATP1A2	835734	386	23	95043	27846	0	0	0	0	50	0	992329	1	1
ATP1A3	1150724	438	33	94848	27222	0	0	0	0	50	0	800696	1	1
ATP1A4	841605	386	29	96447	27339	0	0	0	0	50	0	695227	1	1
ATP1B1	231221	416	19	28977	7371	0	0	0	0	50	1	689078	1	1
ATP1B2	2069567	213	34	28093	6890	0	0	0	0	50	0	673725	1	1
ATP1B3	467997	345	28	26819	6877	0	0	0	0	50	0	737126	1	1
ATP1B4	484939	NaN	23	34580	8476	0	0	0	0	50	0	598663	1	1
ATP2A1	1167826	218	55	93249	27690	0	0	0	0	50	1	970697	1	1
ATP2A2	969445	178	26	97773	27846	0	0	0	0	50	0	805272	1	1
ATP2A3	617494	268	33	98397	29952	0	0	0	0	50	0	695890	1	1
ATP2B1	235578	418	9	119457	32526	0	0	0	0	50	1	805792	1	1
ATP2B2	673500	458	50	116038	32786	0	0	0	0	50	0	850564	1	1
ATP2B3	940418	NaN	24	117533	34450	0	0	0	0	50	2	640042	1	1
ATP2B4	513211	256	35	117572	33592	0	0	0	0	50	0	774358	1	1
ATP2C1	313762	475	19	94809	24687	0	0	0	0	50	0	836485	1	1
ATP2C2	646239	396	5	89453	25480	0	0	1	0	50	1	640107	1	1
ATP4A	1081638	390	41	96356	28210	0	0	0	0	50	1	664066	1	1
ATP4B	723091	370	36	28028	7150	0	0	0	0	50	0	901134	1	1
ATP5A1	388169	300	67	51220	15548	0	0	0	0	50	1	807937	1	1
ATP5B	2757565	164	43	48295	15119	0	0	0	0	50	1	985634	1	1
ATP5C1	199228	475	16	29081	7618	0	0	0	0	50	2	699075	1	1
ATP5D	2214581	234	29	15262	5213	0	0	0	0	50	0	748072	1	1
ATP5E	948552	126	25	5187	1287	0	0	0	0	26	0	358345	1	1
ATP5F1	397613	348	23	24245	6760	0	0	0	0	50	0	697736	1	1
ATP5G1	757963	239	29	12805	3926	0	0	0	0	50	1	849108	1	1
ATP5G2	1616455	189	50	17927	5980	0	0	0	0	50	1	768170	1	1
ATP5G3	343228	752	28	13260	4173	0	0	0	0	50	1	829166	1	1
ATP5H	1111289	171	31	16042	3770	0	0	0	0	50	0	633061	1	1
ATP5I	639827	489	12	6968	1846	0	0	0	0	50	1	693017	1	1
ATP5J	534575	641	29	11739	2808	0	0	0	0	26	1	368420	1	1
ATP5J2	1327454	288	60	10374	2340	0	0	0	0	50	0	628927	1	1
ATP5L	963668	192	48	9646	2834	0	0	0	0	50	2	761839	1	1
ATP5L2	NaN	NaN	NaN	8918	2899	0	0	0	0	31	1	640796	1	1
ATP5O	948739	419	44	20202	5928	0	0	0	0	50	1	798421	1	1
ATP5S	666223	337	28	22438	5330	0	0	0	0	50	0	714116	1	1
ATP5SL	1104034	376	38	26754	5850	0	0	0	0	50	2	642330	1	1
ATP6AP1	2277674	NaN	40	43316	13273	0	0	0	0	50	0	751166	1	1
ATP6AP1L	146069	476	1	20878	6071	0	0	0	0	50	1	739557	1	1
ATP6AP2	456094	NaN	63	33111	9282	0	0	0	0	50	1	691730	1	1
ATP6V0A1	1993535	162	27	81159	20982	0	0	0	0	50	1	788528	1	1
ATP6V0A2	953707	315	40	81731	21502	0	0	0	0	50	0	930267	1	1
ATP6V0B	875223	214	39	19422	5772	0	0	0	0	50	1	726622	1	1
ATP6V0C	2085452	321	49	13897	4667	0	0	0	0	50	1	768690	1	1
ATP6V0D1	1099149	153	45	33449	8905	0	0	0	0	50	1	723606	1	1
ATP6V0D2	192441	1158	-20	33631	8606	0	0	0	0	50	0	800085	1	1
ATP6V0E1	489007	309	40	8060	2080	0	0	0	0	50	0	632970	1	1
ATP6V0E2	438832	686	26	21515	7735	0	0	0	0	50	1	834041	1	1
ATP6V1A	442365	364	33	58591	15899	0	0	0	0	50	0	661102	1	1
ATP6V1B1	504483	623	25	48490	13754	0	0	0	0	50	1	760981	1	1
ATP6V1B2	158991	511	-4	48230	13702	0	0	0	0	50	0	769834	1	1
ATP6V1C1	470948	438	47	37596	9087	0	0	0	0	50	0	891995	1	1
ATP6V1C2	744427	428	42	41015	11089	0	0	0	0	50	0	885677	1	1
ATP6V1D	484235	291	32	23946	6318	0	0	0	0	50	1	648947	1	1
ATP6V1E1	431401	243	-32	22451	5356	0	0	0	0	50	0	774436	1	1
ATP6V1E2	587710	213	36	20891	5785	0	0	0	0	50	0	753870	1	1
ATP6V1F	845100	361	49	11024	3250	0	0	0	0	50	2	924677	1	1
ATP6V1G1	288977	221	10	11401	2834	0	0	0	0	50	0	723788	1	1
ATP6V1G2	2517285	220	35	11401	2990	0	0	0	0	50	0	796978	1	1
ATP6V1G3	105821	404	-16	13806	2535	0	0	0	0	50	0	736554	1	1
ATP6V1H	263637	437	9	47242	11414	0	0	0	0	50	2	722800	1	1
ATP7A	549429	NaN	19	138814	40235	0	0	0	0	50	1	869414	1	1
ATP7B	353147	461	28	134498	40144	0	0	0	0	50	0	768547	1	1
ATP8A1	189404	856	28	115024	29939	0	0	0	0	50	0	830362	1	1
ATP8A2	331788	648	20	114010	30719	0	0	0	0	50	0	885976	1	1
ATP8B1	340613	247	36	119574	31122	0	0	0	0	50	1	608101	1	1
ATP8B2	1695430	236	31	119587	32825	0	0	0	0	50	1	809354	1	1
ATP8B4	278209	408	-21	114582	29211	0	0	0	0	50	0	841750	1	1
ATP9A	171625	419	0	98930	27898	0	0	0	0	50	1	823277	1	1
ATP9B	91487	731	13	109057	29861	0	0	0	0	50	0	793195	1	1
ATPAF1	612038	266	23	30966	8775	0	0	0	0	50	0	686114	1	1
ATPAF2	886959	193	17	27287	7735	0	0	0	0	50	0	731679	1	1
ATPBD4	189209	811	-14	32045	7969	0	0	0	0	50	0	842803	1	1
ATPIF1	779314	213	33	11570	2938	0	0	0	0	50	0	670566	1	1
ATR	564756	403	24	251030	65611	0	0	0	0	50	1	824330	1	1
ATRIP	1441050	223	39	72722	21970	0	0	0	0	50	1	1095757	1	1
ATRN	971216	421	27	136981	35633	0	0	0	0	50	2	941772	1	1
ATRNL1	45264	1002	-20	132340	33488	0	0	0	0	50	0	799656	1	1
ATRX	548517	NaN	8	239291	57694	0	0	0	0	50	1	757939	1	1
ATXN10	498533	172	15	45110	12298	0	0	0	0	50	1	692588	1	1
ATXN1L	NaN	NaN	NaN	60515	20215	0	0	0	0	50	2	1467947	1	1
ATXN2	523776	302	42	121459	36023	0	0	0	0	50	1	655096	1	1
ATXN2L	1146511	221	56	105560	32812	0	0	0	0	50	1	1001624	1	1
ATXN3	356163	415	27	36127	7865	0	0	0	0	50	0	911859	1	1
ATXN3L	295243	NaN	40	33449	8203	0	0	0	0	50	1	737594	1	1
ATXN7	156786	683	8	88530	26598	0	0	0	0	50	1	1010789	1	1
ATXN7L1	406187	454	33	81406	24791	0	0	0	0	50	1	656669	1	1
ATXN7L2	1056159	272	37	65780	20449	0	0	0	0	50	1	656461	1	1
ATXN7L3	930750	175	41	34892	8437	0	0	0	0	50	1	795821	1	1
ATXN7L3B	NaN	NaN	NaN	8918	2548	0	0	0	0	31	1	640445	1	1
AUH	124246	342	24	31746	9516	0	0	0	0	50	1	755963	1	1
AUP1	1019591	315	50	37921	11882	0	0	0	0	50	0	797381	1	1
AURKA	254679	672	-43	38168	10348	0	0	0	0	50	1	985660	1	1
AURKAIP1	1736268	273	28	18148	5837	0	0	0	0	50	1	766350	1	1
AURKB	870950	218	18	32383	9230	0	0	0	0	50	0	679055	1	1
AURKC	407201	924	-63	29250	8346	0	0	0	0	50	3	672360	1	1
AUTS2	52369	997	12	119652	36153	0	0	0	0	50	1	819741	1	1
AVEN	409752	499	0	33280	10049	0	0	0	0	50	1	807898	1	1
AVIL	1106109	238	40	77961	20865	0	0	0	0	50	0	635245	1	1
AVL9	371440	595	10	61412	16861	0	0	0	0	50	0	784472	1	1
AVP	835590	288	54	15132	4641	0	0	0	0	50	0	638638	1	1
AVPI1	514755	143	54	13572	4056	0	0	0	0	50	1	721799	1	1
AVPR1A	250995	521	-32	37947	11232	0	0	0	0	50	0	752024	1	1
AVPR1B	755856	400	10	37154	12727	0	0	0	0	50	0	610064	1	1
AVPR2	2328608	NaN	27	33124	11492	0	0	0	0	50	0	961961	1	1
AWAT1	161347	NaN	27	31161	8346	0	0	0	0	50	1	826943	1	1
AWAT2	166632	NaN	16	31460	8788	0	0	0	0	50	0	779597	1	1
AXIN1	1444992	205	40	79170	23361	0	0	0	0	50	1	1149850	1	1
AXIN2	212714	773	-26	77792	22360	0	0	0	0	50	2	789165	1	1
AXL	1180169	214	15	83226	24453	0	0	1	0	20	1	304382	1	1
AZGP1	1584669	391	36	28080	7449	0	0	0	0	50	0	690820	1	1
AZI1	1748003	243	28	100711	29666	0	0	0	0	50	1	842608	1	1
AZI2	68916	925	9	40742	9724	0	0	0	0	50	1	857519	1	1
AZIN1	689560	171	54	43329	10764	0	0	0	0	50	1	693836	1	1
AZU1	2168802	198	28	22685	7501	0	0	0	0	50	0	824512	1	1
B2M	673122	428	36	11518	3068	0	0	0	0	50	0	731744	1	1
B3GALNT1	340975	583	-20	30979	8021	0	0	0	0	50	1	838370	1	1
B3GALNT2	536528	350	16	47476	12857	0	0	0	0	50	1	766246	1	1
B3GALT1	67289	1010	-14	30199	8060	0	0	0	0	50	0	814528	1	1
B3GALT2	NaN	NaN	NaN	38922	10569	0	0	0	0	50	2	1458301	1	1
B3GALT4	1456953	262	30	32877	11466	0	0	0	0	50	0	764855	1	1
B3GALT5	286705	689	-70	28626	7839	0	0	0	0	50	1	1216592	1	1
B3GALT6	2356409	196	27	28353	10335	0	0	0	0	50	0	976768	1	1
B3GALTL	183118	606	27	48412	12155	0	0	0	0	50	2	763893	1	1
B3GAT1	270422	686	5	30030	9945	0	0	0	0	50	0	768391	1	1
B3GAT2	178636	733	7	29016	9438	0	0	0	0	50	1	881335	1	1
B3GAT3	2695768	217	42	29757	10257	0	0	0	0	50	0	865826	1	1
B3GNT1	1963418	182	55	37089	11739	0	0	0	0	50	1	766298	1	1
B3GNT2	316454	412	38	36855	9867	0	0	0	0	50	1	743184	1	1
B3GNT3	1216364	212	37	33163	10790	0	0	0	0	50	0	642161	1	1
B3GNT4	808864	187	12	33709	10946	0	0	0	0	50	1	754442	1	1
B3GNT5	NaN	NaN	NaN	35282	9061	0	0	0	0	50	2	1456793	1	1
B3GNT7	1124713	359	42	35958	11232	0	0	0	0	50	0	663247	1	1
B3GNT8	1104034	376	38	34359	12363	0	0	0	0	50	2	642330	1	1
B3GNT9	1093307	150	47	34645	12506	0	0	0	0	50	2	819390	1	1
B3GNTL1	303219	483	14	34827	9477	0	0	0	0	50	0	723671	1	1
B4GALNT1	1329939	344	52	48178	15821	0	0	0	0	50	1	900276	1	1
B4GALNT2	868792	346	21	53131	15548	0	0	0	0	50	0	720499	1	1
B4GALNT3	496097	246	32	93704	26143	0	0	0	0	50	0	701935	1	1
B4GALT1	901836	181	28	36296	11167	0	0	0	0	50	0	991432	1	1
B4GALT2	875223	214	39	34164	10413	0	0	0	0	50	1	726622	1	1
B4GALT3	728669	234	37	35386	11648	0	0	0	0	50	1	822666	1	1
B4GALT4	248430	588	3	32591	8554	0	0	0	0	50	0	735254	1	1
B4GALT5	1040657	132	55	36946	9815	0	0	0	0	50	1	778622	1	1
B4GALT6	293258	554	32	36855	9204	0	0	0	0	50	0	920517	1	1
B4GALT7	1316033	475	42	30264	8970	0	0	0	0	50	1	855569	1	1
B9D1	630769	332	11	19578	5343	0	0	0	0	12	0	159029	1	1
B9D2	1193025	249	33	16289	4771	0	0	0	0	50	0	603044	1	1
BAALC	461588	584	15	13559	3835	0	0	0	0	50	1	723359	1	1
BAAT	112947	898	-22	38051	11440	0	0	0	0	50	0	787956	1	1
BACE1	436617	360	36	46293	13689	0	0	0	0	50	0	704288	1	1
BACE2	197460	530	-6	47710	14261	0	0	0	0	50	1	795002	1	1
BACH1	315733	289	60	68497	18356	0	0	0	0	50	1	787683	1	1
BACH2	294466	601	13	77051	22087	0	0	0	0	50	0	844415	1	1
BAD	1613996	257	65	17953	5096	0	0	0	0	50	2	778700	1	1
BAG1	856503	167	38	32149	9347	0	0	0	0	50	1	774982	1	1
BAG2	314024	348	23	19864	5252	0	0	0	0	50	0	823823	1	1
BAG3	731222	199	48	51298	16562	0	0	0	0	50	0	596271	1	1
BAG4	705837	277	46	41639	12571	0	0	0	0	50	0	846599	1	1
BAG5	867608	225	39	45292	12233	0	0	0	0	50	1	715325	1	1
BAGE	NaN	NaN	NaN	4407	1170	0	0	0	0	28	1	477074	1	1
BAGE2	NaN	NaN	NaN	11037	3159	0	0	0	0	31	1	641056	1	1
BAGE3	NaN	NaN	NaN	11037	3159	0	0	0	0	31	1	641056	1	1
BAGE4	NaN	NaN	NaN	4407	1170	0	0	0	0	28	1	477074	1	1
BAGE5	30235	1262	-79	4407	1170	0	0	0	0	50	1	484900	1	1
BAHCC1	3216151	268	24	227981	74893	0	0	0	0	44	0	649090	1	1
BAHD1	888588	192	47	69212	23101	0	0	0	0	50	1	762957	1	1
BAI1	296361	567	25	145028	44941	0	0	0	0	50	0	937729	1	1
BAI2	1169755	173	36	145314	45084	0	0	0	0	50	0	785694	1	1
BAI3	11277	1175	-22	145444	37427	0	0	0	0	50	0	798070	1	1
BAIAP2	1727896	243	16	55042	15236	0	0	0	0	2	0	37297	1	1
BAIAP2L1	609918	249	36	48932	13000	0	0	0	0	50	0	832091	1	1
BAIAP2L2	1528130	197	73	49348	14690	0	0	0	0	50	0	823160	1	1
BAIAP3	1150864	215	36	110942	33202	0	0	0	0	50	0	698178	1	1
BAK1	1252332	205	35	19695	5889	0	0	0	0	50	0	616798	1	1
BAMBI	204133	418	13	24310	6539	0	0	0	0	50	0	770471	1	1
BANF1	3854361	208	57	8502	2340	0	0	0	0	50	0	789542	1	1
BANF2	594840	432	1	9594	2340	0	0	0	0	50	1	644514	1	1
BANK1	80568	482	-7	75894	18564	0	0	0	0	50	0	802334	1	1
BANP	639210	231	31	50791	14066	0	0	0	0	50	1	669058	1	1
BAP1	1078407	229	62	68185	19721	0	0	0	0	50	0	763035	1	1
BARD1	310874	948	11	73099	19487	0	0	0	0	50	0	844051	1	1
BARHL1	1522970	581	37	29016	9672	0	0	0	0	50	1	1027611	1	1
BARHL2	82474	897	-4	35100	10686	0	0	0	0	50	0	785278	1	1
BARX1	448425	479	25	22867	7436	0	0	0	0	50	0	928746	1	1
BARX2	287214	440	-19	25688	7618	0	0	0	0	50	0	725582	1	1
BASP1	237391	349	-10	20631	6201	0	0	0	0	50	1	757887	1	1
BAT1	2515825	220	35	41015	10738	0	0	0	0	50	0	796978	1	1
BAT2L1	651666	272	34	205426	60242	0	0	0	0	50	0	786838	1	1
BAT2L2	406372	793	2	256100	74542	0	0	1	0	50	1	706108	1	1
BAT3	2517236	193	20	103038	33345	0	0	0	0	50	0	1002937	1	1
BAT4	2517236	193	20	31876	10205	0	0	0	0	50	0	1002937	1	1
BAT5	2517236	193	20	58123	16601	0	0	0	0	50	0	1002937	1	1
BATF	691659	175	49	11817	3237	0	0	0	0	50	1	519558	1	1
BATF2	3151458	209	52	24271	8216	0	0	0	0	50	1	867412	1	1
BATF3	399829	364	30	11895	3393	0	0	0	0	50	0	773214	1	1
BAX	1927185	211	43	23452	7046	0	0	0	0	50	0	750880	1	1
BAZ1A	615028	184	24	148265	37960	0	0	0	0	50	1	739999	1	1
BAZ1B	929895	162	48	140478	36114	0	0	0	0	50	0	845130	1	1
BAZ2A	2782714	164	50	175656	51714	0	0	1	0	50	1	947648	1	1
BAZ2B	351229	414	23	205283	53950	0	0	1	0	50	1	837967	1	1
BBC3	1350139	232	33	29016	2106	0	0	0	0	50	1	728533	1	1
BBOX1	178328	527	-18	37206	9282	0	0	0	0	50	0	950079	1	1
BBS1	1642783	194	56	55133	16939	0	0	0	0	50	1	887692	1	1
BBS10	563668	507	-10	66287	18655	0	0	0	0	50	0	717340	1	1
BBS12	134067	172	14	64857	18486	0	0	0	0	50	0	690547	1	1
BBS2	543900	285	20	67860	19110	0	0	0	0	50	1	768781	1	1
BBS4	1110048	380	40	50453	12805	0	0	0	0	50	1	657982	1	1
BBS5	370890	418	22	33488	8320	0	0	0	0	50	1	920608	1	1
BBS7	324357	506	29	69017	17680	0	0	0	0	50	0	791947	1	1
BBS9	233203	759	-6	84708	22620	0	0	0	0	50	0	808210	1	1
BBX	224591	699	2	89726	22828	0	0	0	0	50	0	853996	1	1
BCAM	920101	196	-3	57720	18213	0	0	0	0	50	1	646477	1	1
BCAN	1851672	180	37	84799	26741	0	0	0	0	50	0	857246	1	1
BCAP29	512690	753	26	34359	7722	0	0	0	0	50	2	769106	1	1
BCAP31	1716845	NaN	44	29484	8346	0	0	0	0	50	1	697606	1	1
BCAR1	568174	171	16	88946	29107	0	0	0	0	50	1	709020	1	1
BCAR3	595695	173	9	76466	21892	0	0	0	0	50	1	786864	1	1
BCAS1	163555	415	2	54626	15535	0	0	0	0	50	1	761878	1	1
BCAS2	652485	394	6	22074	5382	0	0	0	0	50	1	733681	1	1
BCAS3	211130	576	-11	87841	24596	0	0	0	0	50	0	717600	1	1
BCAS4	421783	191	36	22191	6318	0	0	0	0	50	2	817492	1	1
BCAT1	252342	905	2	38298	10530	0	0	0	0	50	0	928161	1	1
BCAT2	1700740	181	39	36751	10868	0	0	0	0	50	0	805207	1	1
BCCIP	206845	738	-4	37349	9490	0	0	0	0	50	0	716599	1	1
BCDIN3D	1291800	231	45	26702	7813	0	0	0	0	50	0	975572	1	1
BCHE	28918	1215	-18	56303	14716	0	0	0	0	50	0	806949	1	1
BCKDHA	1104034	376	38	41860	11648	0	0	0	0	50	2	642330	1	1
BCKDHB	131029	869	-9	37206	10413	0	0	0	0	50	1	1150370	1	1
BCKDK	1296884	351	35	38389	11570	0	0	0	0	50	2	818597	1	1
BCL10	348743	384	3	21424	6266	0	0	0	0	50	0	735865	1	1
BCL11A	151287	732	7	80392	21944	0	0	0	0	50	1	890240	1	1
BCL11B	316817	629	-40	80106	25077	0	0	0	0	50	1	785447	1	1
BCL2	207116	522	60	22126	7397	0	0	0	0	50	0	540202	1	1
BCL2A1	234803	702	28	18408	4680	0	0	0	0	50	0	795132	1	1
BCL2L1	864206	213	21	21372	6162	0	0	0	0	50	0	624221	1	1
BCL2L10	540700	195	21	18057	6162	0	0	0	0	50	1	690196	1	1
BCL2L11	NaN	NaN	NaN	22646	6136	0	0	0	0	50	2	1453868	1	1
BCL2L12	1733181	195	36	29939	10192	0	0	0	0	50	0	829413	1	1
BCL2L13	413666	221	-23	44356	13442	0	0	0	0	50	1	767364	1	1
BCL2L14	331421	489	26	33436	8957	0	0	0	0	50	0	831311	1	1
BCL2L15	335231	545	13	15509	4147	0	0	0	0	50	0	722267	1	1
BCL2L2	1171456	330	20	17238	5772	0	0	0	0	50	0	790816	1	1
BCL3	812266	188	-22	40339	14222	0	0	0	0	50	0	765505	1	1
BCL6	88374	374	24	65611	18356	0	0	0	0	50	0	749658	1	1
BCL7A	796948	211	31	22152	5772	0	0	0	0	50	1	811148	1	1
BCL7B	955146	171	48	19084	5447	0	0	0	0	50	1	825214	1	1
BCL7C	1546514	207	48	19916	6448	0	0	0	0	50	0	806676	1	1
BCL9	NaN	NaN	NaN	127907	39988	0	0	0	0	50	2	1487720	1	1
BCL9L	1488276	175	54	133848	42744	0	0	0	0	36	0	497627	1	1
BCLAF1	286851	153	21	86411	23062	0	0	0	0	38	0	678054	1	1
BCMO1	302391	288	1	52026	13650	0	0	0	0	50	0	989833	1	1
BCO2	389593	362	2	54938	14638	0	0	0	0	50	0	652470	1	1
BCOR	377184	NaN	42	160316	47320	0	0	0	0	50	0	913146	1	1
BCORL1	389645	NaN	38	159133	51857	0	0	0	0	50	1	789646	1	1
BCORL2	NaN	NaN	NaN	16809	4290	0	0	0	0	50	2	1452022	1	1
BCR	384444	575	43	118716	33540	0	0	0	0	50	0	647153	1	1
BCS1L	1033606	269	43	38584	11726	0	0	0	0	50	1	853814	1	1
BDH1	685310	263	39	32006	9178	0	0	0	0	50	1	919945	1	1
BDH2	350185	454	27	23946	6240	0	0	0	0	50	0	860496	1	1
BDKRB1	326763	501	16	31590	10062	0	0	0	0	50	0	793455	1	1
BDKRB2	330952	500	10	35633	10543	0	0	0	0	50	0	767078	1	1
BDNF	380275	534	-24	33670	9269	0	0	0	0	50	0	859443	1	1
BDP1	365874	516	16	247884	65169	0	0	0	0	50	0	969124	1	1
BEAN	NaN	NaN	NaN	23543	7501	0	0	0	0	50	2	1455233	1	1
BECN1	1633092	190	33	43719	10842	0	0	0	0	50	0	743899	1	1
BEGAIN	402460	304	5	53768	16666	0	0	0	0	50	0	869284	1	1
BEND2	66906	NaN	11	76362	20280	0	0	0	0	50	1	836225	1	1
BEND3	208838	417	30	75517	21944	0	0	0	0	50	0	940498	1	1
BEND4	263825	496	24	48919	14300	0	0	0	0	50	0	699491	1	1
BEND5	25250	886	-8	39494	10816	0	0	0	0	50	0	1087385	1	1
BEND6	428244	271	23	27066	6630	0	0	0	0	50	0	800618	1	1
BEND7	241076	532	25	45058	12818	0	0	0	0	50	0	687752	1	1
BEST2	1959466	226	29	46709	14209	0	0	0	0	50	1	855556	1	1
BEST3	499701	394	14	62465	17212	0	0	0	0	50	1	722124	1	1
BEST4	574317	191	43	43446	13338	0	0	0	0	50	1	745758	1	1
BET1	467883	483	0	11492	2899	0	0	0	0	50	0	774709	1	1
BET1L	1463610	437	24	14703	4290	0	0	0	0	50	0	665847	1	1
BET3L	NaN	NaN	NaN	17342	4654	0	0	0	0	50	2	1452386	1	1
BEX1	456169	NaN	16	12025	2873	0	0	0	0	50	0	686192	1	1
BEX2	455954	NaN	17	15509	3640	0	0	0	0	50	0	837265	1	1
BEX4	466184	NaN	-5	11453	2860	0	0	0	0	50	0	763997	1	1
BEX5	119562	NaN	22	10569	2691	0	0	0	0	50	0	666458	1	1
BFAR	519767	367	45	42614	11245	0	0	0	0	50	0	667823	1	1
BFSP1	552334	239	-23	61139	18109	0	0	0	0	50	0	749580	1	1
BFSP2	342402	497	14	38246	11362	0	0	0	0	50	0	810524	1	1
BGLAP	2266205	211	33	9698	2665	0	0	0	0	6	0	69030	1	1
BGN	971101	NaN	7	34411	9854	0	0	0	0	50	0	501631	1	1
BHLHA15	464632	375	26	16653	5733	0	0	0	0	50	0	693160	1	1
BHLHA9	NaN	NaN	NaN	19682	7891	0	0	0	0	50	2	1455623	1	1
BHLHB9	162942	NaN	27	50076	14040	0	0	0	0	50	1	923481	1	1
BHLHE23	821863	447	61	19435	7085	0	0	0	0	50	1	712855	1	1
BHLHE40	274112	183	33	37817	11128	0	0	0	0	50	0	637962	1	1
BHLHE41	151502	396	15	42965	14170	0	0	0	0	50	0	651716	1	1
BHMT	164477	578	36	38415	10296	0	0	0	0	50	0	721630	1	1
BHMT2	236664	526	38	34541	9217	0	0	0	0	50	1	673699	1	1
BICC1	156609	497	-22	91546	25649	0	0	0	0	50	0	976118	1	1
BICD1	387398	460	23	91208	24466	0	0	0	0	50	0	1105065	1	1
BICD2	573438	393	45	78169	23309	0	0	0	0	50	0	837954	1	1
BID	395559	280	-18	22555	6539	0	0	0	0	50	0	848354	1	1
BIK	624112	241	48	14989	4472	0	0	0	0	50	1	823004	1	1
BIN1	324544	324	17	58149	16068	0	0	0	0	50	2	960349	1	1
BIN2	499804	194	37	53391	14781	0	0	0	0	50	1	678106	1	1
BIN3	761528	224	49	24960	6084	0	0	0	0	50	0	724256	1	1
BIRC3	462955	280	5	57174	14859	0	0	0	0	50	1	849966	1	1
BIRC5	683401	191	24	19721	4342	0	0	0	0	50	0	874939	1	1
BIRC6	388754	517	24	451230	128544	0	0	0	0	15	0	356941	1	1
BIRC7	1005137	285	50	27703	8216	0	0	0	0	50	0	728520	1	1
[truncated: 16,865 more rows]

## Sheet: Hispanic
Table SVII. Mutation significance scores.
gene	expr	reptime	hic	N_nonsilent	N_silent	N_noncoding	n_nonsilent	n_silent	n_noncoding	nnei	x	X	p	q
SETD8	1167786	177	45	38475	10530	0	8	0	0	50	0	893910	2.9392e-12	5.54393e-08
MTHFR	530804	196	39	70875	19800	0	19	0	0	50	0	734190	1.95391e-11	1.84274e-07
PRSS1	285408	636	11	26910	7470	0	11	0	0	50	1	1020360	3.0951e-08	0.000194599
KIAA2018	453036	419	24	235215	68895	0	12	0	0	3	0	142335	2.58641e-06	0.0121962
CDC27	955548	395	18	91440	23985	0	4	1	0	50	1	918495	3.43567e-05	0.129607
ZNF384	2816983	210	61	62115	17535	0	3	0	0	50	0	1076925	9.50018e-05	0.298654
MEF2A	197556	416	12	59730	16590	0	4	0	0	50	0	957735	0.000122833	0.301514
F5	294416	415	11	241065	63630	0	12	0	0	50	0	934395	0.000127882	0.301514
NUDT15	324467	567	34	17805	4830	0	2	0	0	50	0	905580	0.000181336	0.380041
EIF1AX	262207	NaN	37	17010	3645	0	2	0	0	50	0	815205	0.000204293	0.385337
GPRC6A	232554	730	-15	99600	26625	0	3	0	0	50	0	894645	0.000632192	1
OR2A12	222080	812	-11	32325	9615	0	2	0	0	50	2	845550	0.00165399	1
ACSF2	1332860	200	23	67020	18840	0	2	0	0	50	0	1018755	0.00204742	1
ATXN1	109777	623	30	83475	26865	0	2	0	0	50	1	963555	0.00592368	1
CLCN7	1232935	209	37	86685	26445	0	3	0	0	50	0	688095	0.00754092	1
ICAM5	1802015	191	21	93795	32970	0	2	0	0	50	0	1086465	0.00949492	1
NDUFA7	778783	209	14	12225	3795	0	1	0	0	50	1	966795	0.015822	1
CMTM5	1220624	456	31	16860	5055	0	1	0	0	50	0	1049325	0.0160645	1
PPCDC	887844	262	43	22350	6225	0	1	0	0	50	0	1120590	0.0199389	1
CXXC4	18498	982	18	20865	6270	0	1	0	0	50	0	936210	0.0222787	1
DCAKD	831501	191	28	24255	7605	0	1	0	0	50	0	1003650	0.0241566	1
SPANXE	28355	NaN	-20	10905	2775	0	1	0	0	50	0	868695	0.0247839	1
GAA	663665	237	27	101115	30960	0	2	0	0	50	1	987030	0.0250217	1
CHIC1	319167	NaN	11	24885	6390	0	2	0	0	50	0	976185	0.0254801	1
C4orf51	221010	1168	26	22485	5820	0	2	0	0	50	0	866625	0.025933	1
EMP3	1478750	217	36	17850	5100	0	1	0	0	50	0	1317915	0.0267128	1
C6orf221	732413	446	18	22905	6975	0	1	0	0	50	0	852240	0.0268623	1
LCE2B	169158	818	24	11775	3390	0	1	0	0	50	0	850455	0.0272987	1
TM2D1	174892	296	-9	22770	6390	0	1	0	0	50	1	989430	0.0289548	1
FXYD1	745516	357	-9	11115	2700	0	1	0	0	50	0	752400	0.0290991	1
SPINK8	1054170	263	37	11385	2565	0	1	0	0	50	0	765975	0.029275	1
SERINC4	784327	286	37	30300	8445	0	1	0	0	50	0	1005435	0.0301168	1
C20orf202	NaN	NaN	NaN	13020	3855	0	1	0	0	50	2	1674315	0.0306186	1
GSTO2	293891	376	8	26775	7065	0	1	0	0	50	0	864345	0.0309561	1
SPARC	725286	496	43	34080	8580	0	1	0	0	50	0	1070730	0.0318058	1
C19orf41	1458117	445	27	24360	6870	0	1	0	0	50	0	751605	0.0323864	1
CDON	611194	249	10	135180	39015	0	2	0	0	50	1	1140375	0.0326452	1
FAM32A	787753	219	34	12855	3030	0	1	0	0	50	0	746385	0.0338405	1
CLEC11A	652250	593	27	33645	10635	0	1	0	0	50	0	946650	0.0355094	1
DLX6	99426	991	-15	31470	8580	0	1	0	0	50	0	857250	0.0366755	1
NAP1L3	33770	NaN	-11	54645	13800	0	1	0	0	50	0	1483455	0.036801	1
THAP11	1039476	143	49	32295	10230	0	1	0	0	50	0	853185	0.037814	1
ST8SIA2	288853	578	-30	40185	11475	0	1	0	0	50	0	1061565	0.0378161	1
ASPN	NaN	NaN	NaN	42075	10620	0	1	0	0	50	2	1681080	0.0382999	1
OR14I1	141426	710	-10	32070	10050	0	1	0	0	50	2	1264290	0.0388021	1
RPL6	715909	201	31	31260	8835	0	1	0	0	50	0	740025	0.0421888	1
JOSD1	1056349	262	45	22155	5790	0	1	0	0	50	0	1024110	0.0423144	1
POU4F2	38882	987	-10	42465	13065	0	1	0	0	50	0	990720	0.0428075	1
BHLHE22	9265	1050	-1	37935	13635	0	1	0	0	50	0	869130	0.0435887	1
SYNC	1452351	195	34	53850	14955	0	1	0	0	50	0	1200210	0.0448039	1
GLRA3	62161	797	-15	51195	13200	0	1	0	0	50	0	1109715	0.0460646	1
NECAB1	108662	842	-13	40305	9375	0	1	0	0	50	2	1323855	0.0468108	1
GLTP	876814	323	39	22845	6225	0	1	0	0	50	0	940515	0.0473811	1
HOXA1	356045	385	28	35940	9690	0	1	0	0	50	1	956940	0.0475732	1
STAP2	2122615	220	27	49065	14025	0	1	0	0	50	0	1005225	0.0487289	1
ATXN3	356163	415	27	41685	9075	0	1	0	0	50	1	1052145	0.0502285	1
ASAH1	366238	474	20	49800	12885	0	1	0	0	50	0	983640	0.050538	1
BNIP3L	194595	376	26	24405	6195	0	1	0	0	50	0	939540	0.0505819	1
C18orf21	399000	585	15	24150	6405	0	1	0	0	50	0	928965	0.050622	1
LAG3	2816186	232	48	54345	18015	0	1	0	0	50	0	1067295	0.0508266	1
TMEM54	1019374	232	15	23280	7725	0	1	0	0	50	0	889785	0.0509384	1
TBP	425191	598	-16	36885	10095	0	1	0	0	50	0	721470	0.0510318	1
CNO	501020	201	62	22320	7200	0	1	0	0	50	0	850080	0.0511141	1
RAB27A	212605	573	-20	24675	6195	0	1	0	0	50	0	928335	0.0517268	1
ZNF286B	NaN	NaN	NaN	56940	14205	0	1	0	0	50	2	1684665	0.0517698	1
IDI2	338115	407	30	24915	6585	0	1	0	0	50	0	929325	0.052162	1
FRG1	49764	1059	-15	29760	6735	0	1	0	0	50	0	1100895	0.0525834	1
ACTG1	3582152	268	26	39990	11670	0	1	0	0	50	0	757050	0.0527211	1
C19orf22	2230583	191	36	28830	8835	0	1	0	0	50	0	1021800	0.054817	1
HTRA1	252955	279	5	50505	15870	0	1	0	0	50	0	911505	0.0552906	1
E2F4	1109491	150	46	44595	13005	0	1	0	0	50	0	803730	0.0553668	1
MPZL3	805791	211	41	25605	7245	0	1	0	0	50	0	896070	0.0554957	1
TMEM33	272281	261	25	27045	7515	0	1	0	0	50	0	944925	0.0555836	1
FA2H	612822	173	27	39990	11535	0	1	0	0	50	0	712635	0.0559935	1
PRDM6	NaN	NaN	NaN	62535	19185	0	1	0	0	50	2	1689645	0.0560573	1
RNF166	802673	189	41	26010	7200	0	1	0	0	50	0	874305	0.0577077	1
ELP4	165949	879	-7	46020	13065	0	1	0	0	50	1	997380	0.0586492	1
PTEN	259678	300	34	45420	10560	0	1	0	0	50	0	768450	0.0589636	1
HIST1H2BM	267617	634	32	13245	3990	0	1	0	0	50	1	653340	0.0589671	1
PSMB6	1368906	195	28	25605	7875	0	1	0	0	50	0	829710	0.0597946	1
TMEM184A	595899	243	38	44025	13215	0	1	0	0	50	1	931350	0.0601103	1
CTDSPL	408788	457	22	30540	8205	0	1	0	0	50	0	980550	0.0603303	1
FGF3	783792	561	37	24405	8355	0	1	0	0	50	0	780075	0.0605923	1
CYP4F2	825892	575	15	56730	15720	0	1	0	0	50	0	933720	0.0606026	1
C11orf46	28896	1021	-17	28515	7260	0	1	0	0	50	0	897060	0.0615325	1
JMJD8	1207790	194	33	30600	9630	0	1	0	0	50	0	948405	0.0624264	1
ZIC3	12849	NaN	-2	49140	14400	0	1	0	0	50	0	784755	0.0624497	1
C3orf54	1306720	191	39	29625	9525	0	1	0	0	50	0	917625	0.0624633	1
C18orf45	299157	244	65	33615	9000	0	1	0	0	50	0	1033200	0.0629317	1
TPP1	424523	491	17	60105	18285	0	1	0	0	50	0	950625	0.0630533	1
C2orf61	738157	206	39	27735	7635	0	1	0	0	50	0	837885	0.0639902	1
ZNF844	NaN	NaN	NaN	72525	18060	0	1	0	0	50	2	1688520	0.0644227	1
FAAH	597667	255	28	61755	19155	0	1	0	0	50	0	953190	0.0646015	1
SLC18A1	158991	511	-4	57645	15885	0	1	0	0	50	0	888270	0.0647085	1
NAP1L2	196410	NaN	-3	49500	12735	0	1	0	0	50	0	756060	0.0652789	1
TRIM25	320339	324	-38	67875	18840	0	2	0	0	50	0	1034670	0.0654074	1
MTX2	239999	888	11	29895	7365	0	1	0	0	50	0	880395	0.0655862	1
CA3	100997	1460	-18	28740	7665	0	1	0	0	50	0	845655	0.0656405	1
ICA1	176442	544	19	54630	13230	0	1	0	0	50	0	815040	0.0668215	1
DKC1	1739324	NaN	7	57015	15030	0	1	0	0	37	0	848115	0.067018	1
CHRNE	1416161	231	30	52935	16005	0	1	0	0	50	0	787125	0.0670432	1
CTSA	725555	209	59	54930	15225	0	1	0	0	50	0	816060	0.0671029	1
MED28	271066	989	32	19320	5475	0	1	0	0	50	1	833715	0.0671086	1
VSTM2B	NaN	NaN	NaN	29295	10035	0	1	0	0	50	2	1680495	0.0673161	1
ARGLU1	169398	1237	11	29250	8280	0	1	0	0	50	0	835575	0.067541	1
LOXL1	337765	439	34	59820	18885	0	1	0	0	50	0	882495	0.0675724	1
FBXO6	682357	264	32	31785	8805	0	1	0	0	50	0	906465	0.0676507	1
ADRA1A	259233	692	3	58350	17700	0	1	0	0	50	0	857445	0.0678359	1
C15orf43	706600	569	31	25185	5820	0	1	0	0	50	1	1068330	0.0682278	1
CYP2D6	1296288	363	43	52140	16710	0	1	0	0	50	1	964440	0.0688184	1
TPI1	2822601	232	32	31140	8775	0	1	0	0	50	0	870600	0.0689586	1
EDN3	831202	402	-9	27195	7725	0	1	0	0	50	0	754830	0.0694407	1
HSPA6	741254	448	41	66270	20670	0	1	0	0	50	0	949365	0.0695727	1
PARM1	175795	775	18	31905	10620	0	1	0	0	50	0	880695	0.0698103	1
RBM46	73501	1021	-18	57435	15375	0	1	0	0	50	0	818925	0.0698995	1
MYADML2	NaN	NaN	NaN	30690	10980	0	1	0	0	50	2	1681440	0.0703661	1
HDDC2	155442	373	-19	22650	5925	0	1	0	0	50	1	923715	0.0708653	1
TUBE1	152199	296	5	52800	13530	0	1	0	0	50	0	728250	0.0722436	1
FOSB	1259254	191	39	34770	11535	0	1	0	0	50	0	918885	0.0727975	1
NCL	1052303	216	43	78285	20040	0	1	0	0	50	0	1069575	0.0729265	1
KIAA1467	697100	196	7	66000	20355	0	1	0	0	50	0	899070	0.0731408	1
BCL6B	1696302	360	24	50385	15855	0	1	0	0	50	0	684960	0.0732888	1
CDCA8	445023	375	27	31170	8565	0	1	0	0	50	0	813945	0.0736399	1
GPX1	1661046	201	34	22215	7530	0	1	0	0	50	1	869145	0.0737522	1
PIM1	705207	236	50	33750	9540	0	1	0	0	50	0	875685	0.0740949	1
STYXL1	1072825	218	49	34920	8865	0	1	0	0	50	0	905760	0.0741172	1
DMKN	954618	367	35	63210	18150	0	1	0	0	50	0	837270	0.075204	1
MCAM	1087523	214	48	70035	20100	0	1	0	0	50	0	926415	0.0753053	1
HAGHL	1207790	194	33	37230	10830	0	1	0	0	50	0	948405	0.075413	1
BCL2L10	540700	195	21	20835	7110	0	1	0	0	50	1	796380	0.0754221	1
ANKRD10	506421	402	22	44910	12825	0	1	0	0	50	3	986595	0.0763869	1
GYPA	131210	1033	-8	16905	4560	0	1	0	0	50	2	850395	0.0763881	1
GPR88	348181	846	-6	37245	14910	0	1	0	0	50	0	901140	0.079233	1
MAGEB16	3857	NaN	-24	34365	9690	0	1	0	0	50	1	1242015	0.0795842	1
GMPS	345838	388	4	75855	20625	0	1	0	0	50	0	935400	0.0807347	1
POTEA	236622	755	-37	56100	13515	0	2	0	0	50	2	1065930	0.0825803	1
ZACN	1611239	218	22	43845	13440	0	1	0	0	50	0	1014540	0.0826892	1
PSG11	263820	178	-32	35970	10290	0	1	0	0	50	0	831000	0.0828145	1
STRADB	468064	491	26	46215	12330	0	1	0	0	50	0	1065510	0.0829762	1
SYNGR3	1747301	183	46	23700	7890	0	1	0	0	50	1	806355	0.0843199	1
SOX11	10248	1198	-17	46110	13650	0	1	0	0	50	0	1038405	0.0848599	1
FAM164C	919043	222	47	48645	13410	0	1	0	0	50	0	1094715	0.0849175	1
MTMR1	288573	NaN	9	72930	19680	0	1	0	0	50	0	852150	0.0851637	1
PRB1	175992	673	-18	33930	11520	0	1	0	0	50	1	1126860	0.0862881	1
TMEM229A	NaN	NaN	NaN	38355	13080	0	1	0	0	50	2	1683540	0.0870374	1
ZNF764	2214934	142	54	42210	13365	0	1	0	0	50	0	924765	0.0871188	1
SIRPB1	421731	424	39	81315	24795	0	1	0	0	50	0	927210	0.0872478	1
FAM53A	902379	350	33	40935	13470	0	1	0	0	50	0	894075	0.0873747	1
EYA3	827177	316	28	63780	16770	0	1	0	0	50	1	885750	0.0885238	1
ANKK1	107636	610	12	80385	24375	0	1	0	0	50	0	901830	0.0886629	1
MAP3K4	80018	860	-2	175380	46515	0	2	0	0	14	0	388140	0.0889526	1
RIMKLB	302894	262	17	41235	11910	0	1	0	0	50	0	883260	0.0890114	1
YTHDC1	126481	485	0	80805	20355	0	1	0	0	50	0	902025	0.0891023	1
COQ4	1813435	201	46	27825	9165	0	1	0	0	50	1	878535	0.0905506	1
ZRSR2	170722	NaN	47	54555	12630	0	1	0	0	50	2	848865	0.0913855	1
FAM169A	424900	581	31	73455	19290	0	1	0	0	50	1	982950	0.0918835	1
DCAF12L2	11596	NaN	-29	47085	15555	0	1	0	0	50	0	973215	0.0920863	1
FOXD4L1	528113	595	15	40935	14280	0	1	0	0	50	0	834465	0.0933063	1
GMDS	160107	647	20	41205	10950	0	1	0	0	50	0	834075	0.0939327	1
PPP1R13L	1269856	191	31	85845	28230	0	1	0	0	50	0	907200	0.0940644	1
C16orf7	1090549	219	38	66600	21240	0	1	0	0	50	0	697410	0.0949191	1
QPCTL	939821	180	44	39180	13605	0	1	0	0	50	0	780810	0.0953341	1
LRRC26	1722012	202	36	32190	13440	0	1	0	0	50	1	955485	0.0960269	1
KCNK3	1198614	300	41	40365	13140	0	1	0	0	50	1	1197240	0.0960955	1
CLEC4G	688482	384	31	32220	9000	0	1	0	0	50	1	954330	0.0962223	1
PCDHB13	915569	724	-11	81510	26355	0	1	1	0	50	1	1012815	0.0966001	1
ACTBL2	160055	456	3	39330	11655	0	1	0	0	50	0	770115	0.0969406	1
GPR19	791330	136	44	43890	12450	0	1	0	0	50	0	855810	0.0973266	1
NPY5R	74427	1197	-18	47280	13110	0	1	0	0	50	0	920025	0.0975158	1
NKD1	307084	646	-6	50640	14565	0	1	0	0	50	0	977325	0.0982799	1
CTH	339263	379	-3	44790	12000	0	1	0	0	50	0	858885	0.0988801	1
GSPT1	564730	294	51	69915	18735	0	1	0	0	50	0	701640	0.0989924	1
OR4S1	278638	642	-40	32190	9615	0	1	0	0	50	1	920925	0.0994412	1
TMEM176B	734961	689	14	28920	8880	0	1	0	0	50	1	822045	0.100052	1
ASH2L	671169	258	34	69615	18180	0	1	0	0	50	1	818700	0.100492	1
RASSF5	504163	288	21	48480	14565	0	1	0	0	50	0	910755	0.10082	1
PYGO2	1612870	224	35	41610	13695	0	1	0	0	50	0	779010	0.101149	1
B3GALT2	NaN	NaN	NaN	44910	12195	0	1	0	0	50	2	1682655	0.101173	1
ZNF714	164756	1079	-42	60750	14715	0	1	0	0	50	2	848115	0.101297	1
THAP8	980636	320	19	27900	9765	0	1	0	0	50	1	781875	0.101405	1
DSN1	794301	231	64	40020	9975	0	1	0	0	50	0	746655	0.101481	1
LRRTM1	10982	1577	-18	54045	16740	0	1	0	0	50	0	1002525	0.102035	1
MPND	2122615	220	27	54270	15840	0	1	0	0	50	0	1005225	0.102177	1
RTF1	820644	237	37	79125	20010	0	1	0	0	50	0	761640	0.103151	1
SLC22A7	1293543	363	51	56295	19530	0	1	0	0	50	0	1030455	0.103327	1
ABHD5	103561	437	33	37875	10455	0	1	0	0	50	1	1037925	0.103575	1
SHBG	2069567	213	34	42600	13245	0	1	0	0	50	0	777375	0.103628	1
FOXE3	193133	347	8	31125	12075	0	1	0	0	50	1	844680	0.104532	1
TRMU	493681	260	39	46500	12270	0	1	0	0	50	0	840150	0.104605	1
CES3	993495	135	41	61860	17610	0	1	0	0	50	0	1116105	0.104744	1
PRMT5	1177534	225	34	72150	19695	0	1	0	0	50	0	681555	0.105083	1
FBXW7	117295	501	51	91560	24540	0	1	0	0	50	1	1011585	0.106476	1
[truncated: 18,671 more rows]
